# Supplementary material for: Multi-omics analysis to examine microbiota, host gene expression and metabolites in the intestine of black tiger shrimp (Penaeus monodon) with different growth performance
Source: PeerJ. 2020 Aug 14;8:e9646. doi: 10.7717/peerj.9646 (PMC7430268; doi:10.7717/peerj.9646)
Supplement: Supplemental Information 4 [file peerj-08-9646-s004.xlsx]

## Sheet: Sheet4
Table S1.Raw read counts and taxonomy assignment of 16S amplicon sequences in Top-weight group (T, n=15) and Bottom-weight group (B, n=15).
Phylum	Genus	T01	T02	T03	T04	T05	T06	T07	T08	T09	T10	T11	T12	T13	T14	T15	B01	B02	B03	B04	B05	B06	B07	B08	B09	B10	B11	B12	B13	B14	B15
Acidobacteria	Acanthopleuribacter	1	1	0	1	4	0	0	1	2	0	2	1	1	6	27	6	2	2	6	6	147	567	5	10	0	85	4	20	24	90
	Blastocatella	0	0	0	0	1	0	0	0	0	0	0	0	0	0	0	0	0	0	0	0	0	0	0	0	0	0	1	0	0	0
	Unclassified Blastocatellaceae (Subgroup 4)	0	5	0	0	0	0	0	0	0	0	0	0	0	0	0	0	0	0	0	0	0	0	0	0	0	0	0	0	0	0
Acidobacteria Total		1	6	0	1	5	0	0	1	2	0	2	1	1	6	27	6	2	2	6	6	147	567	5	10	0	85	5	20	24	90
Actinobacteria	Brevibacterium	0	9	0	0	10	2	3	0	0	2	10	0	0	0	3	13	2	0	0	0	3	3	0	1	0	3	0	2	0	0
	Corynebacterium	0	3	0	0	0	0	0	0	0	0	1	0	0	0	0	0	0	0	0	0	0	0	0	0	0	0	1	0	0	0
	Corynebacterium 1	1	22	3	2	14	0	0	0	0	1	15	0	1	2	0	3	1	0	0	2	4	0	9	7	0	4	0	11	27	0
	Demequina	1	1	0	0	12	0	0	0	0	0	1	0	1	0	26	0	0	3	2	7	0	2	0	1	0	0	0	3	0	22
	Dietzia	1	18	0	0	7	3	3	3	0	2	19	2	0	0	3	7	0	0	0	0	7	2	2	0	0	2	3	4	13	0
	Glutamicibacter	0	0	0	0	0	0	0	0	0	0	0	0	0	0	0	3	0	0	0	0	0	0	0	0	0	0	0	0	0	0
	Ilumatobacter	0	0	0	0	3	1	0	6	0	0	0	0	0	0	0	0	0	0	1	2	1	5	3	0	0	0	0	0	7	0
	Janibacter	0	0	0	0	0	0	0	0	0	0	0	0	0	0	0	0	0	0	0	0	0	0	0	0	0	5	0	0	0	0
	Lawsonella	0	0	0	0	0	0	0	0	0	7	0	0	0	0	0	0	0	0	0	0	0	0	0	0	0	0	0	0	0	0
	Micrococcus	0	38	2	0	0	0	2	1	1	1	23	0	1	0	2	6	0	0	0	1	2	0	0	1	0	3	0	0	5	0
	Mycobacterium	0	26	0	0	0	0	0	0	0	0	31	0	0	0	0	0	0	0	0	0	0	0	0	0	0	0	0	0	0	0
	Ornithinimicrobium	0	10	0	0	2	0	0	0	0	0	6	0	0	0	0	0	0	2	0	0	1	0	0	0	0	1	1	0	0	0
	Propionibacterium	2	19	0	5	10	0	0	12	2	18	10	0	0	1	6	2	0	0	18	0	1	2	2	2	1	8	2	3	22	1
	Pseudonocardia	0	12	0	0	0	0	0	1	1	0	6	1	1	0	1	0	0	0	0	0	1	0	0	0	0	1	0	0	0	0
	Rhodococcus	0	8	4	1	0	0	2	0	0	1	14	0	0	0	0	0	0	0	0	0	0	0	0	0	0	1	0	0	0	0
	Rothia	0	0	0	0	0	0	0	0	0	0	0	0	0	0	0	0	0	0	0	0	0	0	0	0	0	0	0	16	0	0
	Timonella	0	0	0	0	301	0	0	0	1	0	0	16	19	8	35	0	0	1	0	1	0	0	0	1	0	0	0	0	0	0
	Turicella	0	0	0	0	0	0	0	0	0	0	0	1	0	0	0	0	0	0	104	0	0	0	0	0	0	0	0	4	0	0
	Unclassified	0	10	3	0	15	1	2	15	3	0	12	8	2	1	11	0	0	0	0	3	3	4	7	3	0	3	2	6	39	0
	Unclassified Acidimicrobiaceae	1	1	0	0	8	0	0	0	0	0	0	2	1	0	0	0	0	0	1	0	0	3	0	0	0	0	1	0	0	0
	Unclassified Microbacteriaceae	5	17	8	0	3	9	0	50	4	1	14	2	1	0	14	14	0	1	0	1	8	15	1	2	0	3	4	12	102	10
	Unclassified Sva0996 marine group	0	0	0	0	5	1	0	29	0	0	0	8	1	0	4	0	0	0	0	1	9	30	2	1	0	6	6	3	0	1
	uncultured actinobacterium	0	0	0	0	1	0	5	0	0	0	0	0	0	0	0	0	0	0	0	0	0	0	0	2	0	0	0	0	0	0
Actinobacteria Total		11	194	20	8	391	17	17	117	12	33	162	40	28	12	105	48	3	7	126	18	40	66	26	21	1	40	20	64	215	34
Bacteroidetes	Algoriphagus	0	0	1	0	3	0	0	2	1	0	0	4	0	0	12	4	2	9	2	0	42	46	8	0	1	7	2	0	276	11
	Alloprevotella	0	0	0	0	0	0	0	0	0	0	0	0	0	0	0	0	0	0	0	0	0	0	1	0	0	0	0	7	0	0
	Aquibacter	0	0	1	0	0	3	0	25	7	0	0	7	0	0	2	0	0	0	1	0	5	2	2	0	0	1	1	3	3	0
	Aquimarina	1	1	9	0	46	15	0	2	0	2	0	0	1	0	0	0	0	0	0	1	0	3	0	0	0	0	0	0	0	0
	Aureisphaera	0	3	0	0	0	0	4	2	1	0	1	2	33	0	0	0	0	0	0	0	0	0	0	0	0	1	0	0	4	0
	Carboxylicivirga	0	0	0	0	1	18	10	1	0	0	0	3	0	52	302	0	0	0	0	0	0	0	0	0	0	0	0	0	0	0
	Chryseobacterium	0	0	15	0	0	0	0	0	0	0	0	0	0	0	0	0	0	0	0	0	0	0	0	0	0	0	0	0	0	0
	Cloacibacterium	0	2	0	0	3	0	1	0	0	0	3	0	0	0	0	6	0	2	0	1	0	0	0	2	0	5	0	0	3	0
	Confluentibacter	1	0	0	0	11	2	9	31	7	2	2	47	1	1	0	0	0	2	1	0	25	44	8	2	0	1	4	0	150	10
	Crocinitomix	0	0	0	0	0	1	0	6	5	0	0	1	0	0	0	0	0	0	0	0	0	9	0	1	0	0	1	0	0	0
	Fabibacter	0	0	0	0	0	0	0	0	0	0	0	0	0	0	0	0	0	1	0	0	0	0	2	1	0	1	1	0	1	0
	Flavobacterium	15	34	9	3	4	0	1	2	3	0	62	2	27	3	2	3	0	0	400	1	49	125	10	11	0	12	215	8	125	22
	Flexithrix	0	0	0	0	0	0	0	7	0	0	1	2	0	0	0	0	0	0	0	0	1	0	0	0	1	0	0	0	11	0
	Fluviicola	4	0	0	1	3	1	0	1	0	0	1	7	0	0	0	0	1	0	4	0	23	54	3	1	0	14	0	2	0	9
	Gilvibacter	0	0	0	0	0	1	0	0	1	0	0	0	0	0	0	11	1	6	19	6	94	272	10	11	2	22	15	13	56	16
	Leadbetterella	0	0	0	0	3	1	0	0	0	0	0	2	0	0	0	0	0	0	1	0	0	0	0	0	0	0	0	0	0	0
	Lewinella	4	0	2	0	6	0	1	5	0	2	0	4	2	4	10	0	2	0	3	1	19	23	9	5	1	6	5	4	5	3
	Maribacter	0	0	0	0	26	0	6	78	5	0	0	28	1	1	3	1	1	2	3	0	8	29	6	0	0	6	6	6	64	6
	Meridianimaribacter	41	3	856	494	881	147	96	43	577	3920	5	69	112	134	46	24	22	154	770	32	93	231	86	15	41	22	82	623	1016	83
	Mesoflavibacter	109	756	436	763	89	359	769	18	113	3709	740	226	910	1934	864	957	118	64	1331	192	254	1797	184	1005	67	301	2695	112	386	104
	Muricauda	2	1	2	6	6	5	4	121	7	0	0	57	11	0	5	6	0	3	1	0	7	12	0	0	0	4	0	1	30	1
	Nonlabens	0	0	0	0	0	0	0	0	0	0	0	0	0	0	1	0	0	0	1	0	1	5	0	0	0	0	0	0	1	0
	NS3a marine group	0	0	0	0	0	0	0	2	0	0	0	0	0	0	0	6	0	6	1	2	0	6	0	6	0	1	6	2	39	1
	Owenweeksia	1	0	1	0	2	0	3	1	2	1	0	3	0	0	4	0	0	22	7	4	43	228	24	3	2	19	13	6	977	20
	Pedobacter	0	0	8	0	0	0	0	0	0	0	0	0	0	0	0	0	0	0	0	0	0	0	0	0	0	0	0	1	0	0
	Phaeocystidibacter	0	1	0	1	0	1	2	43	0	0	6	0	2	0	0	39	0	3	1	5	24	38	0	9	0	0	35	16	217	0
	Roseivirga	0	0	0	0	0	0	0	0	0	0	0	0	0	0	0	0	0	0	2	1	4	12	2	2	0	2	2	2	25	0
	Rubidimonas	0	0	0	0	0	0	0	0	0	0	0	0	0	0	0	0	0	1	0	0	1	3	0	0	0	1	0	0	0	0
	Rubrivirga	0	0	0	0	1	0	0	0	0	0	0	1	1	1	2	0	0	0	1	0	3	2	0	1	0	2	0	2	0	1
	Saccharicrinis	0	3	0	0	1	0	345	43	0	0	3	3	0	1	2	0	0	0	0	0	0	0	0	0	0	0	0	0	0	2
	Schleiferia	0	0	2	0	5	0	0	0	0	0	0	1	0	0	4	0	0	2	1	0	4	2	4	0	0	0	1	2	0	0
	Sphingobacterium	0	0	0	0	0	0	0	0	0	0	0	0	0	0	0	7	0	0	0	0	0	0	0	0	0	0	0	0	0	0
	Spongiimonas	34358	4388	7102	922	295	87	161	1	1543	974	5059	30565	8445	6271	32532	6	13161	7387	458	5106	0	3	32	2	202	9	12343	56	2	93
	Taibaiella	0	0	0	0	0	0	0	0	0	0	0	0	0	0	0	0	0	0	0	0	0	3	0	0	0	0	0	0	0	2
	Tamlana	0	9	0	0	12	0	8	195	3	0	2	17	0	0	1	9	1	4	8	1	20	58	10	3	0	8	4	1	447	3
	Tenacibaculum	2	0	0	0	6	0	1	0	10	0	0	0	1	0	0	2	2	0	0	0	7	4	3	0	0	0	4	0	8	2
	Unclassified	181	6	232	88	12	2	3	3	79	53	7	725	341	171	274	18	488	351	40	169	41	120	7	10	33	22	373	14	70	10
	Unclassified Cryomorphaceae	1	0	0	1	0	0	0	10	0	0	1	3	3	0	2	6	0	3	1	1	14	36	3	1	0	12	14	7	98	7
	Unclassified Cytophagaceae	0	0	0	0	6	0	0	1	0	0	1	1	0	0	0	0	1	0	0	0	1	11	2	0	0	0	0	1	11	1
	Unclassified Flammeovirgaceae	0	0	0	0	1	0	0	13	0	0	0	7	0	0	0	0	0	1	0	0	1	0	0	0	0	0	0	0	4	0
	Unclassified Flavobacteriaceae	4	8	15	0	20	1	5	10	1	1	3	17	20	7	16	4	0	4	43	9	23	31	12	5	3	7	41	39	71	1
	Unclassified Marinilabiaceae	5	2	0	0	26	0	38	164	4	0	0	16	1	14	51	0	0	4	0	0	0	3	0	0	0	2	0	3	27	0
	Unclassified NS9 marine group	0	0	0	0	0	0	0	0	0	0	0	0	0	0	0	0	0	0	0	0	0	0	0	0	0	0	0	0	15	0
	Unclassified Rhodothermaceae	0	0	0	0	2	0	0	1	0	0	0	0	3	0	0	0	0	0	0	0	0	0	0	0	0	0	0	0	0	0
	Unclassified Saprospiraceae	1	0	7	2	20	3	1	2	1	7	0	2	2	0	3	3	0	2	7	0	20	14	2	0	0	6	2	5	0	4
	Unclassified uncultured Bacteroidetes bacterium	0	0	0	0	1	0	0	0	0	0	0	0	0	0	3	0	0	0	0	0	5	12	1	0	0	0	0	0	0	0
	Unclassified uncultured Bacteroidetes/Chlorobi group bacterium	0	0	0	0	0	0	0	0	0	0	0	0	0	0	0	0	0	0	1	0	2	11	0	0	0	1	0	0	0	0
	uncultured Flavobacteriales bacterium	0	2	0	0	2	0	0	0	0	0	1	0	0	0	0	0	0	0	0	0	9	6	0	0	0	1	1	0	0	0
	uncultured Flavobacterium sp.	10	1	0	3	0	33	0	2	0	3	0	0	39	20	109	1	4	2	41	3	27	145	24	4	2	9	19	5	17	19
	Winogradskyella	1	0	1	0	5	1	1	0	0	4	0	4	2	3	6	9	1	0	13	0	38	151	19	4	1	19	11	10	10	18
Bacteroidetes Total		34741	5220	8699	2284	1499	681	1469	835	2370	8678	5898	31826	9958	8617	34256	1122	13805	8035	3162	5535	908	3551	474	1104	356	524	15896	951	4169	449
Deinococcus-Thermus	Deinococcus	0	0	71	0	0	0	0	0	0	0	0	0	0	0	0	0	0	0	0	0	0	0	0	0	0	0	0	0	0	0
Deinococcus-Thermus Total		0	0	71	0	0	0	0	0	0	0	0	0	0	0	0	0	0	0	0	0	0	0	0	0	0	0	0	0	0	0
FBP	Unclassified	0	0	0	0	0	0	0	0	0	0	0	0	0	0	0	0	0	0	0	0	0	0	0	0	0	0	0	8	0	0
FBP Total		0	0	0	0	0	0	0	0	0	0	0	0	0	0	0	0	0	0	0	0	0	0	0	0	0	0	0	8	0	0
Firmicutes	Anoxybacillus	0	0	0	0	0	0	0	0	0	0	0	1	0	0	1	4	0	0	0	0	5	0	0	2	0	28	0	10	11	0
	Bacillus	0	1	5	41	46	0	38	1	22	3	0	0	7	4	8	4	0	0	0	0	0	0	1	98	0	9	0	8	9	0
	Brevibacillus	0	8	5	210	442	0	15	0	69	20	9	2	2	15	7	0	0	2	0	0	6	0	0	0	0	5	0	0	28	0
	Butyricicoccus	0	0	0	0	0	0	0	0	0	0	0	0	0	0	6	0	0	0	0	0	0	0	0	0	0	0	0	0	0	0
	Caproiciproducens	0	0	0	0	0	0	0	0	0	0	0	0	0	0	0	4	2	15	0	0	0	0	0	7	4	0	0	0	0	0
	Clostridium sensu stricto 1	0	0	0	0	0	0	0	0	0	0	0	0	0	0	0	5	0	3	0	0	0	0	0	3	3	0	0	0	0	0
	Enterococcus	1	0	0	0	0	0	0	0	0	0	0	0	0	0	0	9	0	0	0	0	0	0	0	0	0	0	0	0	0	0
	Fusibacter	0	154	2	1	6	2942	0	3	6	16	192	0	29	4210	19980	0	0	0	0	0	1	0	0	0	0	5	0	0	8	0
	Geobacillus	0	0	0	0	0	0	0	0	0	0	0	1	0	0	0	9	0	0	0	0	0	0	0	0	0	1	0	0	5	0
	hydrothermal vent metagenome	0	0	1	0	9	2	0	8	1	0	0	6	1	0	0	0	0	0	1	0	5	3	0	2	0	0	0	0	16	0
	Listeria	0	0	0	0	0	0	0	0	0	0	0	0	0	0	0	0	0	0	0	0	0	0	0	0	0	0	0	1	15	0
	Lysinibacillus	0	0	2	6	4	0	0	5	9	1	0	2	2	0	3	2	0	0	2	0	0	0	0	0	0	10	0	2	8	0
	Paraclostridium	0	1	3	0	0	0	0	0	0	0	0	0	0	0	3	2	1	2229	1	0	1	0	0	1	0	3	0	0	8	2
	Proteocatella	0	0	0	0	0	352	3	0	1	0	0	0	14	0	0	0	0	0	0	0	0	0	0	0	0	0	0	0	0	0
	Ruminococcus 1	0	0	0	0	0	0	0	0	0	0	0	0	0	0	0	0	0	0	0	0	0	0	0	0	0	0	0	0	0	0
	Staphylococcus	0	5	1	2	12	0	10	3	0	17	1	0	2	0	19	0	0	1	6	1	3	0	6	12	0	5	0	9	11	2
	Streptococcus	0	0	0	0	0	0	0	0	1	2	0	0	0	0	0	0	0	0	1	0	1	0	0	1	3	0	0	14	1	0
	Tyzzerella	0	0	0	0	0	0	0	0	0	0	0	0	0	3	14	0	0	0	0	0	0	0	0	0	0	0	0	0	0	0
	Unclassified	0	0	0	0	0	0	0	0	0	0	0	0	0	0	0	0	0	0	0	0	0	0	0	0	0	0	0	0	6	0
	Unclassified Family XII	0	27	3	0	1	724	0	1	1	4	49	1	8	952	1473	0	0	0	0	0	0	0	0	0	0	0	0	0	0	0
	Veillonella	0	0	0	0	0	0	0	0	0	0	0	0	0	0	0	0	0	0	0	0	0	0	0	0	0	0	0	3	0	0
Firmicutes Total		1	196	22	260	520	4020	66	21	110	63	251	13	65	5184	21514	39	3	2250	11	1	22	3	7	126	10	66	0	47	126	4
Fusobacteria	Propionigenium	0	0	0	0	0	0	0	0	0	0	0	0	0	79	557	0	0	26	0	0	0	0	1	0	0	0	0	0	0	0
	Unclassified	20	5	1	0	30	12	14	1	47	6	4	48	18	4	3	11	52	118	6	233	54	44	10	142	5	3	15	77	25	71
	Unclassified Leptotrichiaceae	5283	853	33510	36349	24154	2979	8963	175	24371	34061	871	34723	31643	18346	12636	1095	29751	35476	24209	14496	2110	6635	49151	20805	52597	8361	22536	28035	1958	9867
Fusobacteria Total		5303	858	33511	36349	24184	2991	8977	176	24418	34067	875	34771	31661	18429	13196	1106	29803	35620	24215	14729	2164	6679	49162	20947	52602	8364	22551	28112	1983	9938
Gracilibacteria	Unclassified	315	289	0	0	0	1209	910	2	1415	1	362	1	3960	92	511	6	0	1653	1	96	4	8	0	0	0	0	182	24	5	1
Gracilibacteria Total		315	289	0	0	0	1209	910	2	1415	1	362	1	3960	92	511	6	0	1653	1	96	4	8	0	0	0	0	182	24	5	1
Planctomycetes	Blastopirellula	0	3	3	0	15	14	5	29	8	0	4	20	3	3	13	2	0	1	2	3	3	21	2	4	0	0	2	5	73	4
	Pir4 lineage	0	2	1	0	12	3	0	50	9	0	5	9	0	1	2	0	0	1	2	5	1	16	0	1	0	1	1	1	53	2
	Pirellula	0	2	0	0	0	0	0	2	1	0	3	2	2	0	0	0	0	1	0	1	0	2	0	0	0	0	0	0	8	0
	Planctomyces	2	42	1	0	21	6	1	81	50	0	46	31	3	0	6	5	0	2	6	5	11	28	4	3	0	0	3	1	151	2
	Rhodopirellula	1	12	3	0	10	2	5	54	0	0	14	14	0	2	1	6	1	1	0	6	1	6	0	1	0	1	1	2	81	1
	Rubripirellula	0	0	0	0	0	0	0	0	0	0	0	0	0	0	0	4	0	0	0	0	0	3	1	0	0	0	0	0	12	0
	SM1A02	6	4	10	0	11	1	17	217	13	5	4	46	4	1	4	3	1	2	21	0	23	63	5	4	0	3	1	1	130	10
	Unclassified	0	2	1	2	2	4	2	13	7	0	1	2	11	3	4	2	0	0	1	2	7	8	7	3	0	4	1	6	27	6
	Unclassified Planctomycetaceae	0	2	3	0	11	0	1	10	1	1	1	4	0	0	0	0	0	3	4	0	6	9	3	0	0	1	0	3	49	2
Planctomycetes Total		9	69	22	2	82	30	31	456	89	6	78	128	23	10	30	22	2	11	36	22	52	156	22	16	0	10	9	19	584	27
Proteobacteria	Achromobacter	0	0	2	0	0	0	0	0	0	0	0	0	0	0	0	0	0	0	0	0	0	0	0	0	0	0	0	0	0	0
	Acinetobacter	0	6	479	4	6	0	1	0	2	2	9	0	4	0	2	2	0	0	0	0	46	21	3	5	1	4	5	10	9	0
	Actibacterium	0	0	0	0	0	0	0	4	0	0	0	0	0	0	0	0	0	0	0	0	0	0	0	0	0	2	0	0	2	0
	Aestuariibacter	0	0	0	0	0	0	0	0	0	0	0	0	0	0	0	1	2	7	14	3	97	193	12	3	1	70	4	2	24	24
	Albimonas	0	9	0	0	5	0	0	0	0	0	1	0	0	0	3	0	0	2	0	0	0	2	0	1	0	0	1	3	3	0
	Aliagarivorans	0	0	0	0	0	0	13	6	0	0	0	2	0	0	0	376	1	8	0	22	426	0	14	2	0	0	0	0	112	2
	Alkanindiges	0	0	7	0	0	0	0	0	0	0	0	0	0	0	0	0	0	0	0	0	0	0	0	0	0	0	0	1	0	0
	alpha proteobacterium GMD21G01	0	5	0	0	13	2	1	7	1	1	6	0	2	2	0	65	0	10	7	13	24	71	7	17	3	7	25	12	728	10
	Altererythrobacter	1	0	0	2	2	0	0	3	0	0	1	4	4	0	8	3	0	1	1	0	19	31	15	6	0	4	1	17	62	8
	Alteromonas	1	0	0	0	1	0	0	0	0	0	0	0	0	0	0	4	1	1	7	1	59	135	8	3	0	75	3	6	17	18
	Anderseniella	0	0	0	0	1	3	1	4	0	1	0	1	0	0	0	0	0	0	0	0	1	5	0	0	1	0	0	0	2	0
	Aquabacterium	0	7	1	0	0	0	1	0	0	0	4	0	0	0	0	1	0	0	0	0	0	0	0	0	0	0	0	1	4	0
	Arcobacter	0	0	0	0	0	14	0	2	0	0	0	1	0	4	43	0	0	0	0	0	0	0	0	0	0	0	0	0	0	0
	Aureimonas	0	6	0	0	0	0	0	0	0	0	4	0	0	0	0	0	0	0	0	0	0	0	0	0	0	0	1	0	0	0
	Bdellovibrio	0	2	0	0	0	0	2	0	0	0	1	0	1	0	1	0	0	0	0	0	5	7	0	0	0	0	0	2	0	0
	Beggiatoa	0	2	0	0	0	0	0	3	1	1	1	0	0	0	0	0	0	0	0	0	0	0	0	0	0	0	0	0	0	0
	Bermanella	0	0	0	0	0	0	0	0	0	0	0	0	0	0	0	2	0	0	0	1	1	4	0	0	0	1	1	1	0	2
	Bowmanella	0	0	0	0	0	0	0	0	0	0	0	0	0	0	0	0	0	0	0	0	0	0	0	0	0	8	0	0	2	0
	Bradyrhizobium	0	8	0	2	0	1	16	0	0	0	11	0	1	0	0	23	1	1	0	0	2	1	2	2	0	6	0	0	0	2
	Brevundimonas	0	30	54	2	15	3	5	1	1	6	44	5	0	1	4	26	0	0	3	0	3	0	0	8	2	2	1	3	9	4
	Burkholderia-Paraburkholderia	0	1	1	2	2	0	0	0	4	3	0	0	2	1	4	0	0	1	0	0	0	0	12	210	14	104	5	5	14	0
	C1-B045	0	0	0	0	0	0	0	0	0	0	0	0	0	0	0	0	0	0	0	1	0	2	0	0	1	0	0	0	2	0
	Candidatus Alysiosphaera	0	1	0	0	0	0	0	4	3	0	0	0	0	0	0	0	0	0	0	0	0	0	0	0	0	0	0	0	4	0
	Candidatus Riegeria	0	0	0	0	0	39	0	0	0	0	0	0	0	14	117	0	0	0	0	0	0	0	0	0	0	0	0	0	0	0
	Candidatus Tenderia	0	0	0	0	0	0	0	0	0	0	0	0	0	0	0	0	0	0	0	0	0	1	0	0	0	2	0	0	0	0
	Candidatus Xenohaliotis	0	0	0	0	4	3	0	3	4	0	1	1	0	0	0	0	0	0	0	0	0	0	0	0	0	0	0	0	0	0
	Catenococcus	0	0	0	0	5	0	0	0	4	0	0	3	7	0	1	1	1	0	2	9	9	0	0	12	1	5	2	2	2	0
	Catenovulum	0	0	0	0	0	0	0	0	0	0	0	0	0	0	0	2	1	1	0	1	16	52	2	0	0	8	0	2	2	2
	Caulobacter	0	2	0	1	0	0	6	0	3	2	0	0	0	0	1	0	0	0	0	0	1	0	13	61	4	21	1	3	4	0
	Cohaesibacter	353	1	6	0	99	94	0	0	7	375	0	56	224	620	103	0	0	0	203	23	5	0	0	3	0	95	0	21	69	0
	Comamonas	0	51	0	0	0	0	0	0	0	1	36	0	0	0	2	0	0	0	0	0	0	0	0	2	0	6	1	1	1	2
	Delftia	0	2	0	0	0	0	0	0	0	0	3	0	0	0	0	0	0	0	0	0	1	0	0	0	0	0	0	0	0	0
	Desulfovibrio	0	0	0	0	0	197	0	0	0	0	0	0	0	120	592	0	0	0	0	0	0	0	0	0	0	0	0	0	0	0
	Devosia	1	7	0	0	2	0	11	29	2	0	2	7	0	2	5	0	0	0	1	0	9	9	0	0	0	0	0	0	50	3
	Donghicola	13	6	0	0	17	25	1	2	14	4	1	6	40	4	14	28	2	3	17	5	30	77	13	6	2	20	10	47	104	15
	Dongia	0	8	0	0	0	0	0	0	0	0	3	0	0	0	0	0	0	0	0	0	0	0	0	0	0	0	0	0	0	0
	Emcibacter	0	0	0	0	0	0	0	0	0	1	0	0	0	0	0	0	0	0	0	0	0	0	0	0	0	0	0	0	9	0
	Endozoicomonas	0	0	0	0	1	15	2	0	0	0	0	0	0	3	20	5	0	0	0	0	0	0	0	0	0	0	0	0	0	0
	Enhydrobacter	0	3	40	0	8	0	0	1	0	0	1	0	0	0	1	0	0	0	0	0	0	0	1	0	0	0	0	1	0	0
	Erythrobacter	3	2	0	0	21	1	19	18	1	1	4	7	1	2	7	64	0	6	6	7	48	80	22	20	2	14	17	34	326	25
	Escherichia-Shigella	0	0	0	0	0	0	0	0	0	0	6	0	1	0	2	0	0	0	0	0	0	0	0	0	0	0	0	0	2	0
	Ferrimonas	0	0	0	0	0	0	0	4	0	0	0	0	0	0	0	687	0	329	0	100	0	2	1	0	0	393	310	0	6	0
	Filomicrobium	0	0	0	0	1	0	0	14	2	0	0	2	0	0	0	0	0	0	0	1	3	0	0	0	0	0	0	0	14	1
	Gemmobacter	0	0	0	0	0	1	0	2	0	0	0	1	0	0	0	0	0	1	0	0	1	5	0	0	0	0	1	3	33	1
	Haliea	0	1	0	0	4	1	2	45	15	1	2	11	0	0	3	3	1	2	0	1	2	6	3	4	0	3	0	0	176	5
	Halobacteriovorax	0	0	0	0	0	0	2	2	0	0	0	1	0	0	0	0	0	0	5	0	0	0	0	0	0	1	0	0	0	0
	Halomonas	0	0	0	1	1	0	0	0	0	0	0	0	0	1	1	6	1	2	0	0	10	2	0	0	0	0	0	0	40	2
	Hyphomicrobium	0	0	0	0	1	0	0	1	0	0	0	2	0	0	0	0	0	0	0	0	0	3	0	0	0	0	0	0	3	0
	Kordiimonas	0	0	0	0	0	0	1	1	0	0	0	0	0	0	0	18	0	0	0	1	4	14	0	3	0	38	1	1	22	6
	Labrenzia	1	135	1	13	9	1	1	74	1	0	179	41	15	0	4	12	1	6	4	20	25	48	3	7	0	5	4	8	273	3
	Magnetospira	0	1	0	2	0	0	0	0	0	0	0	1	0	0	0	3	0	0	0	0	0	9	4	2	0	0	1	2	23	0
	Maricaulis	0	0	0	0	0	0	0	0	0	0	2	0	0	0	0	0	0	0	0	0	0	2	0	0	0	4	0	0	0	0
	marine metagenome	0	0	0	0	2	0	0	0	0	0	0	0	0	0	0	0	0	0	0	0	0	0	0	0	0	1	0	0	12	0
	Marinobacter	10	6	1	0	3	0	0	0	3	0	10	12	15	20	95	67	18	13	1	35	23	39	2	7	0	11	3	25	31	8
	Marinomonas	0	0	0	0	0	0	0	0	0	0	0	1	0	0	0	1	1	1	0	0	16	32	2	1	1	45	2	1	4	0
	Maritalea	60	1	11	1	54	83	1	38	15	10	0	27	68	30	28	37	0	4	20	0	78	46	31	36	3	185	6	193	171	12
	Marivita	0	5	3	0	4	5	2	22	14	15	3	9	0	0	2	17	0	7	0	4	15	19	6	2	0	2	2	8	277	3
	Massilia	0	1	45	0	4	0	0	0	0	0	0	0	0	0	0	0	0	0	1	0	0	0	3	1	0	6	0	0	2	0
	Mesorhizobium	0	0	1	0	0	0	0	0	0	0	0	0	0	0	0	0	0	0	0	0	0	2	0	0	0	0	0	0	8	0
	Methylobacterium	0	0	0	1	0	0	0	3	0	0	0	0	0	0	2	8	0	0	0	0	0	0	0	1	0	0	0	0	3	0
	Nautella	7	9	3	0	73	2	2	19	4	3	13	17	12	1	15	65	6	83	17	33	251	390	58	15	3	66	31	50	6256	80
	Neptunomonas	0	0	0	0	24	0	0	1	0	2	0	13	1	0	3	0	0	0	1	0	23	32	1	1	1	75	7	2	10	9
	Nitrosomonas	0	0	0	0	1	0	0	13	0	1	0	1	0	0	0	0	0	0	0	0	0	1	0	0	0	0	0	0	4	0
	Noviherbaspirillum	0	28	0	0	0	0	0	0	0	0	18	0	0	0	0	0	0	0	0	0	0	0	0	0	0	0	0	0	0	0
	Novosphingobium	0	0	0	0	0	0	4	0	2	1	0	0	1	0	4	0	0	0	0	0	0	2	5	55	0	28	2	2	28	0
	Oceanicaulis	0	0	0	0	0	0	0	0	0	0	0	0	0	0	0	0	0	0	0	0	1	2	0	0	0	0	0	0	0	0
	Ochrobactrum	1	17	2	1	6	0	5	0	0	1	15	0	0	0	1	0	0	2	0	1	1	6	2	0	0	3	0	1	7	0
	OM43 clade	0	0	0	0	0	0	0	1	1	0	0	0	0	0	0	1	0	1	0	0	0	0	0	0	0	0	1	0	2	0
	Ottowia	0	17	0	0	0	0	0	0	0	1	12	0	0	0	2	3	0	0	0	0	0	0	0	1	0	3	0	1	1	0
	Paracoccus	1	14	3	4	8	0	3	5	0	8	20	0	46	0	1	4	0	1	0	0	7	0	0	1	0	2	0	4	24	0
	Paraglaciecola	0	0	0	0	0	0	0	0	0	0	0	0	0	0	0	0	0	0	0	0	3	3	1	0	0	5	0	0	0	2
	Parvularcula	0	0	0	0	0	0	0	0	0	0	0	0	0	0	0	0	0	0	0	0	0	3	0	0	0	0	0	0	0	0
	Pelomonas	0	11	0	0	4	1	0	1	0	2	17	0	0	0	3	15	0	1	2	0	3	1	4	3	2	14	1	0	24	1
	Phaeomarinomonas	1	17	0	0	44	1	14	36	3	0	24	15	2	0	4	7	1	11	2	10	42	87	12	9	0	18	9	10	1291	11
	Photobacterium	15592	32569	168	32	7829	7835	5327	546	16268	216	37443	9756	486	521	3105	12759	4347	10727	310	9587	476	10126	80	6517	9	363	6685	14264	232	56322
	Pleomorphomonas	0	0	0	0	0	0	0	8	0	0	0	2	0	0	0	0	0	0	0	0	0	1	0	0	0	0	0	0	9	0
	Ponticoccus	2	15	1	1	27	1	0	18	3	5	9	6	0	2	0	26	0	4	0	0	16	23	1	3	0	6	2	7	361	2
	Pseudoalteromonas	1	91	10	1	144	41	24	167	116	3	81	57	30	6	39	7017	158	432	93	1283	18708	453	49	2119	24	490	37	331	24277	379
	Pseudofulvimonas	0	0	0	0	0	0	0	1	0	0	0	0	0	0	0	0	0	0	1	0	0	0	0	0	0	0	0	1	5	0
	Pseudohongiella	0	0	0	0	0	0	0	0	0	0	0	0	0	0	0	0	0	4	0	0	2	0	0	0	0	1	0	0	15	0
	Pseudomonas	1	25	2	26	3	56	6	152	2	0	18	3	1	2	7	5	0	0	0	0	7	14	7	0	0	3	1	9	91	0
	Pseudoroseovarius	881	17	0	0	1186	12	4	16	1	0	9	37	2	14	110	2	0	115	0	3	11	31	2	7	0	1432	9	5	384	6
	Ralstonia	0	18	1	2	8	1	3	0	4	9	10	0	7	0	26	12	0	1	1	0	12	1	74	203	14	215	16	7	44	4
	Rheinheimera	0	0	0	0	0	0	0	0	0	0	0	0	0	0	0	0	0	0	0	0	7	0	0	1	0	1	0	1	7	0
	Rhizobium	0	0	0	0	8	0	0	0	1	0	0	0	0	0	0	0	0	0	0	0	0	0	0	0	0	0	0	0	0	0
	Rhodovulum	0	5	0	0	10	0	0	0	0	0	0	1	1	0	1	0	0	0	0	0	0	0	1	0	0	0	0	1	32	0
	Roseibacterium	0	0	0	0	0	0	0	2	1	0	0	0	0	0	0	0	0	0	0	0	1	0	4	0	0	0	1	0	16	0
	Roseibium	2120	31	11	17	139	611	4	28	14	118	43	48	1295	45	190	34	1	7	896	438	135	57	23	19	2	4	78	29	399	13
	Roseicyclus	1	13	0	0	6	1	0	0	0	0	3	1	0	0	0	0	0	0	0	0	0	5	0	1	0	0	0	0	13	0
	Roseobacter clade NAC11-7 lineage	0	2	0	0	13	3	2	15	1	0	0	3	3	0	3	4	0	0	0	0	2	3	0	0	0	2	1	3	45	1
	Roseovarius	0	7	1	0	18	0	2	18	0	0	7	4	4	0	3	3	2	3	1	2	32	55	7	10	1	19	3	7	392	10
	Ruegeria	13	106	10	63	256	13	34	262	28	12	106	240	13	8	50	56	3	37	10	22	205	329	34	27	4	226	14	73	3474	20
	Shewanella	1	2	0	9	2	22	7	61	1	3	3	2	1	3	3	1	0	1	1	0	1	5	0	1	0	0	0	8	16	2
	Simiduia	0	0	0	0	1	0	1	1	0	0	1	2	0	0	0	0	0	0	3	0	3	6	0	0	0	213	0	0	6	0
	Sneathiella	0	0	0	0	0	0	0	0	0	0	0	0	0	0	0	23	1	12	4	8	6	24	10	12	1	10	4	2	44	2
	Sphingomonas	1	12	13	3	18	1	9	1	3	6	13	0	0	3	0	10	0	1	1	0	3	1	16	82	3	29	3	0	8	3
	Spongiibacter	0	0	0	0	0	0	0	0	0	0	0	1	0	0	2	0	1	1	0	2	5	14	0	1	0	4	1	1	10	4
	Stappia	0	0	0	0	2	1	0	8	0	0	0	0	0	0	1	0	0	0	0	1	1	1	1	0	0	0	0	0	20	0
	Stenotrophomonas	0	0	0	0	0	1	0	0	0	0	0	0	0	0	1	1	0	0	0	0	5	3	4	2	0	0	0	1	23	0
	Tabrizicola	0	0	0	0	6	0	0	2	1	0	0	0	0	0	0	0	0	0	0	1	0	5	2	0	0	0	0	2	15	0
	Tepidimonas	0	0	0	0	0	0	0	0	0	0	0	0	0	0	0	0	0	0	0	0	8	0	0	0	0	2	0	0	5	0
	Thalassobaculum	0	0	0	0	0	0	0	1	0	0	0	0	0	0	0	9	0	1	0	1	0	2	1	4	0	0	0	0	12	0
	Thalassococcus	1	2	0	0	1	0	1	8	2	0	1	2	0	0	0	6	0	1	0	0	14	13	1	0	0	2	0	0	142	2
	Thalassospira	0	1	0	0	0	3	0	0	0	0	0	0	0	0	0	17	0	0	0	1	5	12	6	0	0	2	3	2	33	0
	Thalassotalea	0	1	0	1	2	1	3	3	0	0	3	1	0	1	12	10	5	2	5	2	59	225	9	6	0	186	7	6	27	22
	Thioclava	20	0	0	0	132	0	0	1	0	0	0	1	0	0	0	0	0	0	0	0	0	0	0	0	0	0	0	0	11	0
	Thiorhodospira	0	0	2	0	0	0	0	0	0	0	0	0	7	0	1	0	0	0	41	0	0	2	0	0	0	0	7	1	0	1
	Unclassified	142	524	327	351	1687	211	562	80	1322	282	425	1404	1695	313	561	39	466	365	365	264	53	505	354	185	376	121	299	1905	51	126
	Unclassified Aeromonadaceae	0	8	0	0	0	0	1	370	0	1	3	3	2	0	0	14	0	0	0	0	16	2	3	0	0	1	0	0	1	0
	Unclassified Arenicellaceae	0	0	1	0	0	1	0	5	0	0	0	0	0	0	0	0	0	0	0	0	0	0	0	0	0	0	0	0	0	0
	Unclassified Bdellovibrionaceae	0	0	0	0	0	0	3	0	0	0	0	0	0	0	4	0	0	0	0	0	1	2	0	2	0	6	0	1	0	2
	Unclassified Caulobacteraceae	0	0	0	0	0	0	0	0	0	3	0	1	0	0	1	0	0	0	0	0	0	0	4	15	0	8	2	1	0	0
	Unclassified Ectothiorhodospiraceae	0	0	0	0	1	0	0	3	0	0	0	0	0	0	1	0	0	0	0	0	0	0	0	0	0	0	0	0	0	0
	Unclassified Gammaproteobacteria bacterium YH6	0	1758	39	5	1899	8	507	70	811	1	1627	1004	841	34	182	32	9	2	6	39	11	357	1	3	0	5	24	5	25	2
	Unclassified Halieaceae	1	0	0	0	17	0	3	34	16	0	0	30	0	0	1	0	0	1	0	0	5	1	0	0	0	0	0	0	23	0
	Unclassified Halomonadaceae	0	0	0	0	0	1	0	8	1	0	0	0	0	0	0	0	0	0	0	0	0	0	0	0	0	0	0	0	0	0
	Unclassified Hyphomonadaceae	0	0	3	0	2	0	0	0	1	0	0	0	0	0	4	0	0	0	1	2	10	9	6	1	1	4	0	0	10	5
	Unclassified Legionellaceae	0	2	0	0	2	0	3	13	5	0	0	5	1	0	1	0	0	0	0	0	0	0	0	0	0	0	0	0	0	0
	Unclassified MB19	0	0	0	0	0	8	2	70	0	1	0	2	3	0	16	383	1	313	0	110	5	3	0	0	0	360	310	0	10	1
	Unclassified Moraxellaceae	0	0	0	0	0	0	0	0	0	0	0	0	0	0	2	0	0	0	0	0	0	1	0	0	0	0	0	2	0	0
	Unclassified Nannocystaceae	0	0	0	0	0	0	0	0	0	0	0	0	0	0	0	0	0	0	1	0	3	19	4	1	0	12	0	0	7	10
	Unclassified OM182 clade	0	0	0	0	0	0	0	0	0	0	0	0	0	0	0	1	0	0	0	0	0	3	0	1	0	0	0	0	6	0
	Unclassified Phyllobacteriaceae	0	0	1	0	6	0	0	5	0	2	0	0	5	0	0	0	1	1	1	0	1	3	0	0	0	0	0	0	11	0
	Unclassified Pseudoalteromonadaceae	2	46	9	2	103	9	32	4	124	1	40	39	31	5	39	2424	198	368	130	1247	3988	419	36	2159	63	233	30	293	2513	503
	Unclassified Rhodobacteraceae	515	57	23	1	109	376	5	113	21	2	80	63	29	8	22	36	4	15	11	110	101	167	52	20	5	66	42	102	923	35
	Unclassified Rhodobiaceae	0	0	0	0	0	0	0	0	0	0	0	0	0	0	0	0	0	0	2	0	0	5	0	0	0	2	0	0	0	0
	Unclassified Rhodospirillaceae	155	3535	3119	5713	1524	1128	1185	16	330	3114	4303	161	1607	2218	386	18	965	2131	660	1585	34	15	1749	2075	1421	9661	1577	2470	23	13
	Unclassified Rickettsiaceae	0	0	0	0	0	0	0	0	0	0	0	4	0	0	0	0	0	0	0	0	0	0	0	0	0	0	0	0	0	0
	Unclassified Sandaracinaceae	1	2	0	0	0	0	0	0	0	0	0	0	0	0	0	0	0	0	1	0	3	2	0	2	0	2	0	2	13	1
	Unclassified Thiotrichaceae	0	0	0	0	0	0	0	1	0	0	0	0	0	0	0	0	0	0	0	0	0	2	0	0	0	0	0	0	0	0
	Unclassified Vibrionaceae	5014	8501	2570	3023	4677	1947	3222	197	7845	2721	9589	7055	4714	3853	5921	2435	5251	5477	2606	5878	323	3418	1863	4555	2574	2971	5316	6299	328	10311
	uncultured alpha proteobacterium	0	2	0	1	2	0	3	49	0	0	0	9	0	0	0	0	0	0	2	0	4	3	0	1	0	1	0	0	14	2
	uncultured gamma proteobacterium	0	0	3	0	0	0	0	0	0	4	0	0	5	0	0	0	0	2	0	0	1	2	0	0	0	2	0	0	2	3
	Vibrio	56243	89994	103153	86307	88837	113234	124026	134653	63783	115782	102734	78206	94131	93543	61267	116032	82239	71925	100432	94215	89014	101077	80865	94108	80311	71230	79127	70854	71911	65031
	Woodsholea	0	4	0	0	0	0	0	0	0	0	5	0	0	0	0	0	0	0	0	0	0	0	0	0	0	0	0	0	0	0
Proteobacteria Total		81160	137772	110127	95594	109122	126018	135097	137379	90812	122729	157010	98400	105361	101404	73060	142966	93690	92454	105899	115093	114607	118873	85531	112653	84851	89257	94058	97180	116347	133099
Tenericutes	Candidatus Bacilloplasma	0	0	0	0	3	0	0	0	0	0	0	0	0	0	0	6	3	30	0	5	0	26	0	0	0	0	15	8	1	166
	Unclassified Mycoplasmataceae	2	0	0	0	24	0	0	1	1	0	0	5	0	3	0	0	0	0	0	0	0	0	0	0	0	0	0	0	0	0
Tenericutes Total		2	0	0	0	27	0	0	1	1	0	0	5	0	3	0	6	3	30	0	5	0	26	0	0	0	0	15	8	1	166
Verrucomicrobia	Haloferula	3	112	16	0	48	33	16	295	117	0	127	33	6	2	17	0	0	0	3	2	4	25	2	0	0	1	8	1	18	0
	Opitutus	0	0	0	1	0	0	0	0	0	0	0	0	0	0	0	0	0	1	0	0	0	0	0	0	0	0	0	0	7	0
	Pelagicoccus	0	0	0	0	0	0	2	0	0	0	0	0	0	0	0	0	0	0	0	0	0	0	0	0	0	0	0	0	6	0
	Roseibacillus	0	1	0	0	0	2	0	6	0	1	1	0	0	1	9	0	0	0	0	0	0	0	0	0	0	2	1	0	0	0
	Rubritalea	4	12	33	6	8	16	63	3	21	19	18	14	192	16	27	0	1	0	2	0	9	24	234	3	2	158	4	14	25	14
	Unclassified	0	0	0	0	0	0	0	14	0	0	0	0	0	0	4	0	0	0	0	0	0	2	0	1	0	0	0	0	11	2
	Unclassified DEV007	0	6	0	0	6	5	2	36	1	3	5	7	0	0	9	0	0	0	2	3	4	2	0	4	0	0	2	4	4	0
	Unclassified Rubritaleaceae	0	0	4	0	0	0	0	0	0	0	0	0	0	0	0	0	0	0	0	0	0	0	0	0	0	0	1	0	0	0
	uncultured Verrucomicrobia bacterium	0	2	0	0	0	1	0	6	0	0	3	0	1	0	0	0	0	0	1	1	0	0	0	0	0	0	0	0	0	0
	Verrucomicrobia bacterium PAORIC-16	0	3	0	0	0	0	0	3	2	0	3	3	0	1	5	0	0	0	0	0	0	0	0	0	0	0	0	1	0	0
Verrucomicrobia Total		7	136	53	7	62	57	83	363	141	23	157	57	199	20	71	0	1	1	8	6	17	53	236	8	2	161	16	20	71	16
	Grand Total	121550	144740	152525	134505	135892	135023	146650	139351	119370	165600	164795	165242	151256	133777	142770	145321	137312	140063	133464	135511	117961	129982	135463	134885	137822	98507	132752	126453	123525	143824
