# Supplementary material for: Multi-omics analysis to examine microbiota, host gene expression and metabolites in the intestine of black tiger shrimp (Penaeus monodon) with different growth performance
Source: PeerJ. 2020 Aug 14;8:e9646. doi: 10.7717/peerj.9646 (PMC7430268; doi:10.7717/peerj.9646)
Supplement: Supplemental Information 6 [file peerj-08-9646-s006.xlsx]

## Sheet: 53OTUs
Supplementary Table 3. Microbial profiles comparing between Top- (T) and Bottom- (B) weight groups of 5-month-old P.monodon (n=15/group). The microbiome data was normalized by the total number of reads in the sample to removes bias related to different sequencing depth. OTUs with less than three sequences and not present in at least 12 samples of the total samples in a group were discarded. 53 OT…
OTUID	T1	T2	T3	T4	T5	T6	T7	T8	T9	T10	T11	T12	T13	T14	T15	B1	B2	B3	B4	B5	B6	B7	B8	B9	B10	B11	B12	B13	B14	B15	Kingdom	Phylum	Class	Order	Family	Genus	Species
OTU_37	16	14	0	15	59	0	0	14	34	0	24	12	13	90	378	83	29	29	90	89	2492	8724	74	148	0	1726	60	316	389	1252	Bacteria	Acidobacteria	Holophagae	Acanthopleuribacterales	Acanthopleuribacteraceae	Acanthopleuribacter	Acanthopleuribacter sp.
OTU_55	0	0	0	0	0	15	0	0	17	0	0	0	0	0	0	151	15	86	285	89	1594	4185	148	163	29	447	226	206	907	222	Bacteria	Bacteroidetes	Flavobacteriia	Flavobacteriales	Flavobacteriaceae	Gilvibacter	Gilvibacter sp.
OTU_23	16	0	13	0	29	0	41	14	34	12	0	36	0	0	56	0	0	314	105	59	729	3493	354	44	29	386	196	95	15802	278	Bacteria	Bacteroidetes	Flavobacteriia	Flavobacteriales	Cryomorphaceae	Owenweeksia	Owenweeksia hongkongensis
OTU_4	534414	54484	85154	11821	4047	1096	1909	0	23406	9891	55815	357076	100783	80313	428437	69	177494	98513	5530	66681	0	46	443	30	2554	162	168449	854	32	1112	Bacteria	Bacteroidetes	Flavobacteriia	Flavobacteriales	Flavobacteriaceae	Spongiimonas	Spongiimonas sp.
OTU_48	29766	5748	7123	1368	280	193	259	14	2212	1196	4891	11547	9388	10809	24193	14	13298	6854	1079	8427	0	0	30	0	377	20	12685	16	0	181	Bacteria	Bacteroidetes	Flavobacteriia	Flavobacteriales	Flavobacteriaceae	Spongiimonas	Spongiimonas sp.
OTU_31	0	111	66	3123	6505	0	205	0	1156	242	109	24	26	224	98	0	0	29	0	0	102	0	0	0	0	102	0	0	453	0	Bacteria	Firmicutes	Bacilli	Bacillales	Paenibacillaceae	Brevibacillus	Brevibacillus reuszeri
OTU_114	0	221	39	0	15	1348	0	0	17	48	218	12	106	13635	18687	0	0	0	0	0	0	0	0	0	0	0	0	0	0	0	Bacteria	Firmicutes	Clostridia	Clostridiales	Family XII	Fusibacter	Fusibacter sp.
OTU_8	0	2045	26	15	88	41237	2	0	101	193	2185	0	383	60429	275520	0	0	0	0	0	17	0	0	0	0	102	0	0	130	0	Bacteria	Firmicutes	Clostridia	Clostridiales	Family XII	Fusibacter	Fusibacter sp.
OTU_21	0	14	39	0	0	0	0	0	0	0	0	0	0	0	42	28	15	31829	15	0	17	2	2	15	0	61	0	0	130	28	Bacteria	Firmicutes	Clostridia	Clostridiales	Peptostreptococcaceae	Paraclostridium	Paraclostridium bifermentans
OTU_86	0	0	0	0	0	0	0	0	0	0	0	0	0	0	0	14	29	100	210	44	1645	2970	177	44	15	1421	60	32	389	334	Bacteria	Proteobacteria	Gammaproteobacteria	Alteromonadales	Alteromonadaceae	Aestuariibacter	Aestuariibacter aggregatus
OTU_10	0	24292	512	74	27949	118	6914	1005	13588	12	19746	12152	11120	508	2550	440	131	29	90	576	187	5493	15	44	0	102	362	79	405	28	Bacteria	Proteobacteria	Gammaproteobacteria	Alteromonadales		Motilimonas	Motilimonas sp.
OTU_15	115	83	26	0	486	30	14	158	67	36	133	157	0	15	196	853	87	1171	195	487	4052	5616	842	208	44	629	392	696	99300	1029	Bacteria	Proteobacteria	Alphaproteobacteria	Rhodobacterales	Rhodobacteraceae	Nautella	Nautella sp.
OTU_200	0	235	0	0	147	44	27	0	352	0	85	12	0	0	28	4514	204	985	15	2834	627	892	0	2832	0	41	105	712	243	2726	Bacteria	Proteobacteria	Gammaproteobacteria	Vibrionales	Vibrionaceae	Photobacterium	Photobacterium damselae
OTU_459	0	97	0	0	103	44	14	43	519	0	182	85	0	0	14	3083	262	657	2	2096	780	554	0	2239	0	0	75	743	227	2531	Bacteria	Proteobacteria	Gammaproteobacteria	Vibrionales	Vibrionaceae	Photobacterium	Photobacterium sp.
OTU_6	0	1078	92	15	1766	341	286	1320	1474	12	886	484	278	90	504	87572	1442	4712	1139	14995	276939	5909	576	26259	276	8345	512	4666	357855	4798	Bacteria	Proteobacteria	Gammaproteobacteria	Alteromonadales	Pseudoalteromonadaceae	Pseudoalteromonas	Pseudoalteromonas luteoviolacea
OTU_837	33	304	118	30	1148	0	314	43	1240	0	218	375	278	45	336	21222	2039	2842	1454	9460	46880	3939	428	22790	740	3797	241	2879	29711	2503	Bacteria	Proteobacteria	Gammaproteobacteria	Alteromonadales	Pseudoalteromonadaceae	Pseudoalteromonas	Pseudoalteromonas sp.
OTU_881	0	97	39	0	339	44	41	258	335	24	36	109	106	0	42	7088	306	628	240	2111	26348	831	89	4092	73	1401	45	459	22991	375	Bacteria	Proteobacteria	Gammaproteobacteria	Alteromonadales	Pseudoalteromonadaceae	Pseudoalteromonas	Pseudoalteromonas sp.
OTU_770	0	83	0	0	15	89	55	0	235	0	133	0	26	15	98	5684	175	828	0	3409	5442	1016	15	2269	0	162	45	585	4420	1488	Bacteria	Proteobacteria	Gammaproteobacteria	Alteromonadales	Pseudoalteromonadaceae	Pseudoalteromonas	Pseudoalteromonas sp.
OTU_82	0	83	0	0	15	222	0	818	101	0	61	97	0	0	0	1376	553	700	15	1653	5748	231	59	623	0	102	0	63	4436	70	Bacteria	Proteobacteria	Gammaproteobacteria	Alteromonadales	Pseudoalteromonadaceae	Pseudoalteromonas	Pseudoalteromonas sp.
OTU_79	16	0	0	0	0	0	0	0	17	0	0	0	13	0	0	523	0	71	0	177	8070	0	0	386	0	20	0	16	7707	28	Bacteria	Proteobacteria	Gammaproteobacteria	Alteromonadales	Pseudoalteromonadaceae	Pseudoalteromonas	Pseudoalteromonas sp.
OTU_50	0	69	0	0	191	30	14	100	17	12	73	0	26	30	0	895	0	143	105	192	407	1092	103	252	44	142	377	190	11787	139	Bacteria	Proteobacteria	Alphaproteobacteria	Rhodobacterales	Rhodobacteraceae	Psychromarinibacter	Psychromarinibacter sp.
OTU_58	0	14	0	15	29	0	41	43	0	0	36	12	0	15	112	138	73	29	75	30	899	3262	133	74	0	3695	105	95	437	292	Bacteria	Proteobacteria	Gammaproteobacteria	Alteromonadales	Colwelliaceae	Thalassotalea	Thalassotalea sp.
OTU_102	0	6867	446	59	13658	104	4337	919	9902	24	5546	10215	10948	463	1933	206	175	157	270	856	254	2923	30	252	0	122	437	174	194	139	Bacteria	Proteobacteria	Gammaproteobacteria	Vibrionales	Vibrionaceae	Vibrio	Vibrio sp.
OTU_129	0	6923	682	59	19648	15	6437	43	13823	0	4964	8618	15827	733	2087	234	131	14	255	620	17	5016	0	89	15	61	572	47	146	28	Bacteria	Proteobacteria	Gammaproteobacteria	Vibrionales	Vibrionaceae	Vibrio	Vibrio sp.
OTU_19	444	20727	354	89	11303	2770	9533	48453	3250	326	19734	1888	9534	1360	8167	187117	19124	37140	1618	166304	412051	83042	1609	79505	290	36586	1868	25908	255689	15116	Bacteria	Proteobacteria	Gammaproteobacteria	Vibrionales	Vibrionaceae	Vibrio	Vibrio sp.
OTU_226	99	0	66	59	545	59	95	0	821	60	0	484	1084	419	602	179	1471	1214	165	2302	322	923	738	1305	116	568	90	2056	178	348	Bacteria	Proteobacteria	Gammaproteobacteria	Vibrionales	Vibrionaceae	Vibrio	Vibrio sp.
OTU_25	839	24140	249	208	81094	1259	51497	22705	52325	302	20777	7129	71455	9733	56034	674039	34156	68641	7837	297585	162867	589666	561	118293	464	5116	4309	190280	106521	162226	Bacteria	Proteobacteria	Gammaproteobacteria	Vibrionales	Vibrionaceae	Vibrio	Vibrio sp.
OTU_256	16	83	52	15	383	0	95	29	570	12	61	145	119	75	140	1858	1049	1171	884	3276	2425	1108	103	10646	392	1848	181	1250	1328	1766	Bacteria	Proteobacteria	Gammaproteobacteria	Vibrionales	Vibrionaceae	Vibrio	Vibrio sp.
OTU_276	66	13514	210	45	6373	311	6683	25059	1675	72	11760	932	6492	942	3544	56702	4574	20762	465	26182	127466	46083	1181	20062	813	67772	1461	5204	263720	4033	Bacteria	Proteobacteria	Gammaproteobacteria	Vibrionales	Vibrionaceae	Vibrio	Vibrio vulnificus
OTU_358	16	304	0	0	780	44	450	1091	469	24	146	61	383	105	378	12029	466	942	120	5077	3730	9432	15	1290	73	81	75	2293	1943	1905	Bacteria	Proteobacteria	Gammaproteobacteria	Vibrionales	Vibrionaceae	Vibrio	Vibrio sp.
OTU_389	0	152	118	104	456	0	205	0	888	60	61	315	688	164	140	908	874	585	495	2037	3035	415	162	3989	348	1117	196	617	1085	709	Bacteria	Proteobacteria	Gammaproteobacteria	Vibrionales	Vibrionaceae	Vibrio	Vibrio sp.
OTU_436	0	6218	341	74	12569	59	3710	746	10321	12	4988	8836	9309	299	1541	220	175	0	165	635	51	2293	0	74	0	81	211	16	146	14	Bacteria	Proteobacteria	Gammaproteobacteria	Vibrionales	Vibrionaceae	Vibrio	Vibrio sp.
OTU_607	0	41	39	0	221	0	55	57	436	12	49	36	159	15	28	20727	583	914	480	6656	27789	3677	89	8096	160	1056	75	1471	19818	1460	Bacteria	Proteobacteria	Gammaproteobacteria	Vibrionales	Vibrionaceae	Vibrio	Vibrio sp.
OTU_644	1497	359	1194	297	103	0	95	0	486	326	522	1561	1349	2302	3432	0	1427	671	195	1048	0	46	44	74	174	41	2245	16	0	14	Bacteria	Proteobacteria	Gammaproteobacteria	Vibrionales	Vibrionaceae	Vibrio	Vibrio sp.
OTU_66	0	1340	302	119	6858	0	2796	57	8880	60	1201	4599	7008	359	953	28	87	43	165	428	51	1754	30	59	44	122	331	0	32	0	Bacteria	Proteobacteria	Gammaproteobacteria	Vibrionales	Vibrionaceae	Vibrio	Vibrio sp.
OTU_699	33	276	79	0	1207	252	205	746	1056	24	340	315	410	120	336	28736	2636	3356	1109	12545	99864	5324	517	19943	609	6314	377	3132	92823	3059	Bacteria	Proteobacteria	Gammaproteobacteria	Vibrionales	Vibrionaceae	Vibrio	Vibrio cidicii
OTU_701	16	4118	328	74	8315	30	3273	574	6936	48	3058	5677	9005	658	1569	83	218	14	180	236	0	2016	0	30	15	61	226	16	65	14	Bacteria	Proteobacteria	Gammaproteobacteria	Vibrionales	Vibrionaceae	Vibrio	Vibrio sp.
OTU_137	0	14	26	15	235	0	27	43	218	0	0	36	198	15	70	5106	262	286	105	3380	5086	1369	59	2224	145	386	0	490	3012	431	Bacteria	Proteobacteria	Gammaproteobacteria	Vibrionales	Vibrionaceae	Vibrio	Vibrio sp.
OTU_233	0	470	13	0	162	0	273	72	50	0	388	48	251	105	112	1431	233	828	0	1373	6528	1200	30	1186	15	2822	75	316	7173	209	Bacteria	Proteobacteria	Gammaproteobacteria	Vibrionales	Vibrionaceae	Vibrio	Vibrio sp.
OTU_285	82	3551	0	0	2222	89	355	29	4323	0	2670	2445	132	15	168	28	73	43	15	221	0	723	0	0	0	0	30	0	0	0	Bacteria	Proteobacteria	Gammaproteobacteria	Vibrionales	Vibrionaceae	Vibrio	Vibrio sp.
OTU_449	16	1244	13	0	2267	30	750	0	3334	12	1019	1247	516	60	126	0	87	43	15	44	0	339	0	30	0	0	45	16	0	28	Bacteria	Proteobacteria	Gammaproteobacteria	Vibrionales	Vibrionaceae	Vibrio	Vibrio sp.
OTU_588	82	193	0	0	29	15	0	86	67	36	243	145	0	15	70	509	117	171	210	369	797	2816	133	133	58	3106	121	95	486	403	Bacteria	Proteobacteria	Gammaproteobacteria	Vibrionales	Vibrionaceae	Vibrio	Vibrio sp.
OTU_603	0	14	0	0	15	15	14	72	0	0	0	12	0	0	14	1665	58	143	0	1166	12326	400	15	593	0	183	0	63	14734	97	Bacteria	Proteobacteria	Gammaproteobacteria	Vibrionales	Vibrionaceae	Vibrio	Vibrio sp.
OTU_61	0	14	0	0	206	0	41	14	218	12	49	73	106	15	70	1941	364	543	465	2509	14632	585	74	3989	131	670	45	411	6234	264	Bacteria	Proteobacteria	Gammaproteobacteria	Vibrionales	Vibrionaceae	Vibrio	Vibrio sp.
OTU_639	0	28	26	0	59	15	14	14	34	0	36	0	13	0	28	4184	175	414	90	2745	37470	600	15	3232	15	365	30	332	24108	153	Bacteria	Proteobacteria	Gammaproteobacteria	Vibrionales	Vibrionaceae	Vibrio	Vibrio sp.
OTU_712	0	0	0	30	29	0	27	0	50	0	0	12	40	0	14	2546	87	86	15	1092	2441	539	15	727	0	0	15	79	891	222	Bacteria	Proteobacteria	Gammaproteobacteria	Vibrionales	Vibrionaceae	Vibrio	Vibrio sp.
OTU_718	27643	3275	5326	1621	412	148	164	0	2295	1546	3483	17732	8026	10091	28788	14	11536	4926	614	4280	0	0	15	0	319	0	10923	32	0	97	Bacteria	Proteobacteria	Gammaproteobacteria	Vibrionales	Vibrionaceae	Vibrio	Vibrio sp.
OTU_871	0	14	13	0	147	0	109	14	201	48	0	36	212	0	28	151	437	1228	90	2878	916	477	74	1883	73	61	60	743	405	389	Bacteria	Proteobacteria	Gammaproteobacteria	Vibrionales	Vibrionaceae	Vibrio	Vibrio sp.
OTU_895	0	193	0	0	44	533	0	2067	117	0	182	133	0	0	14	4377	801	1528	0	2051	27857	385	207	519	0	122	0	111	26310	209	Bacteria	Proteobacteria	Gammaproteobacteria	Vibrionales	Vibrionaceae	Vibrio	Vibrio sp.
OTU_105	0	2390	2	0	1192	133	136	1837	637	0	1711	5652	264	30	140	0	73	14	0	162	0	308	0	0	0	0	0	0	32	0	Bacteria	Proteobacteria	Gammaproteobacteria	Vibrionales	Vibrionaceae	Vibrio	Vibrio sp.
OTU_927	0	152	2	0	2	3199	27	14	34	48	267	0	13	5875	13364	0	0	0	0	0	0	0	0	0	0	0	0	0	16	0	Bacteria	Proteobacteria	Gammaproteobacteria	Vibrionales	Vibrionaceae	Vibrio	Vibrio sp.
OTU_87	0	69	0	0	103	0	0	57	17	24	61	36	26	15	14	165	15	57	15	30	475	954	177	59	15	812	256	237	9990	42	Bacteria	Proteobacteria	Alphaproteobacteria	Rhodobacterales	Rhodobacteraceae	Marivivens	Marivivens donghaensis
OTU_41	16	1548	171	0	633	415	123	3401	1642	0	1517	315	53	30	224	0	0	0	45	15	68	339	30	0	0	20	15	16	227	0	Bacteria	Verrucomicrobia	Verrucomicrobiae	Verrucomicrobiales	Verrucomicrobiaceae	Haloferula	Haloferula sp.

## Sheet: 444Genes
Supplementary Table 3. Transcriptomic profiles comparing between Top- (T) and Bottom- (B) weight groups of 5-month-old P.monodon (n=5/group). Normalization and differential expression analysiswere conducted using DESeq2. 444 differentially express genes between the Top-weight group and the Bottom-weight group was identified(|log2 fold change| ≥ 1 and p-value < 0.05).
UnigeneID	T1	T2	T3	T4	T5	B1	B2	B3	B4	B5	Accession ID	Description
Trinity_DN9419_c0_g1_i1	10.8384	576.431	122.721	155.661	119.681	582.27	266.371	1154.11	3400.46	3125.26		_
Trinity_DN88449_c0_g1_i1	12.5058	25.3934	16.0946	10.2531	20.7322	2.59652	1.96584	4.25244	5.4582	2.22915		_
Trinity_DN88168_c0_g1_i1	82.5383	119.349	96.5676	89.4818	92.3525	299.898	243.764	130.975	300.201	162.728		_
Trinity_DN8729_c0_g1_i1	15.007	10.1574	78.4612	149.136	130.047	22.7196	7.86335	5.10292	10.9164	2.22915		_
Trinity_DN86653_c0_g1_i1	0	0	0	0	1.88474	5.19304	31.4534	160.742	2.7291	91.395		_
Trinity_DN83664_c0_g1_i1	15.8407	34.2811	66.3903	89.4818	82.9288	16.8774	4.91459	15.3088	9.55185	2.22915	XP_013772648.1	Glycine Receptor Subunit Alpha-2-Like
Trinity_DN8280_c0_g1_i1	65.0301	50.7869	42.2483	41.0125	54.6576	120.738	100.258	112.264	111.893	95.8532		_
Trinity_DN8250_c0_g1_i1	50.0232	88.877	32.1892	18.642	33.9254	385.583	147.438	129.274	221.057	55.7286		_
Trinity_DN81888_c0_g1_i1	205.095	278.058	158.934	106.26	172.454	758.184	374.492	148.835	2835.54	921.752		_
Trinity_DN81078_c0_g1_i1	11.6721	30.4721	19.1123	13.9815	23.5593	3.89478	4.91459	1.70097	9.55185	3.34372	KFR13461.1	Glycogen Debranching Enzyme
Trinity_DN79148_c0_g1_i1	4.1686	3.80901	8.0473	266.581	246.902	3.89478	2.94876	1.70097	2.7291	1.11457		_
Trinity_DN78480_c0_g1_i1	23.3442	121.888	53.3134	269.378	409.932	11.0352	22.6071	74.8429	28.6556	24.5206	EPF42751.1	Sn-Glycerol-3-Phosphate Transporter, Partial
Trinity_DN75304_c0_g1_i1	75.8685	99.0344	74.4376	56.8582	72.5627	168.774	164.147	139.48	286.556	132.634		_
Trinity_DN73989_c2_g1_i1	683.65	0	150.887	7121.26	7.53898	2.59652	1.96584	17.0097	0	0	ESU47826.1	Hypothetical Protein P376_4196
Trinity_DN6963_c0_g1_i1	77.5359	64.7532	48.2838	50.3335	49.0034	190.195	75.6847	67.1885	1009.77	280.872		_
Trinity_DN69393_c0_g1_i1	33.3488	22.8541	12.071	113.716	41.4644	175.265	271.286	68.039	529.446	55.7286		_
Trinity_DN6928_c0_g1_i1	80.0371	62.2139	62.3666	63.383	53.7152	25.9652	15.7267	17.0097	10.9164	6.68744		_
Trinity_DN68599_c0_g1_i1	1.66744	7.61803	0	0	1.88474	20.7722	30.4705	549.415	16.3746	193.936	ACG33657.1	Serine/Arginine Repetitive Matrix Protein 1
Trinity_DN68505_c0_g1_i1	13.3395	2.53934	6.03548	29.8273	9.42372	49.983	134.66	20.4117	70.9566	57.9578		_
Trinity_DN68305_c0_g1_i1	60.0278	43.1688	62.3666	46.6051	54.6576	145.405	138.592	117.367	158.288	147.124		_
Trinity_DN6824_c0_g1_i1	5.00232	7.61803	2.01183	5.59261	1.88474	8.43869	16.7096	24.6641	15.0101	40.1246		_
Trinity_DN61724_c0_g1_i1	0	0	0	0	0	4.54391	31.4534	90.1517	8.1873	36.7809		_
Trinity_DN61005_c0_g1_i1	13.3395	8.8877	18.1064	11.1852	13.1932	49.3339	27.5217	41.6739	49.1238	33.4372		_
Trinity_DN5849_c1_g1_i2	0.83372	2.53934	4.02365	3.72841	1.88474	7.78956	39.3167	389.523	2.7291	127.061		_
Trinity_DN58477_c0_g1_i1	24.1779	25.3934	12.071	3.72841	11.3085	140.212	345.987	32.3185	218.328	371.153		_
Trinity_DN58270_c0_g1_i1	36.6837	45.7082	34.201	41.0125	32.0407	164.23	37.3509	50.1788	281.097	124.832		_
Trinity_DN5741_c4_g1_i1	2799.63	4325.77	2869.87	8425.27	3567.82	19317.5	5948.62	10262	23276.5	10550.5	AAN16375.1	Lysozyme
Trinity_DN56876_c4_g1_i1	141.732	52.0565	107.633	82.025	66.9084	24.6669	19.6584	11.9068	8.1873	26.7497	KRM61856.1	Hypothetical Protein Fc26_Gl001300
Trinity_DN56835_c0_g1_i9	4313.67	6051.25	3995.49	5003.53	3608.34	1106.77	1735.83	984.014	174.662	1562.63	EGT54950.1	Hypothetical Protein Caebren_32639
Trinity_DN56810_c2_g1_i1	661.973	256.474	2255.26	1357.14	1726.43	68.1587	99.2748	238.987	23.1974	195.05		_
Trinity_DN56770_c1_g1_i2	3126.45	2759	2070.17	2289.24	2289.96	9940.78	11330.1	3649.44	30927.5	16993.9		_
Trinity_DN56768_c0_g1_i1	85.8731	134.585	134.792	94.1423	71.6203	24.0178	43.2484	31.468	9.55185	51.2703	XP_002976387.1	Hypothetical Protein Selmodraft_416325
Trinity_DN56634_c2_g1_i4	401.853	352.969	335.975	648.743	790.65	416.092	3588.64	837.73	23185.1	548.37		_
Trinity_DN56599_c0_g2_i1	18425.2	39060.2	10900.1	13677.7	14391	65726.4	73278.5	74188.9	34658.2	54722.2		_
Trinity_DN56542_c0_g1_i1	7922.84	6196	4979.27	5467.71	4497.94	1583.88	2003.19	1110.74	257.9	2333.92	KRM61856.1	Hypothetical Protein Fc26_Gl001300
Trinity_DN56538_c0_g1_i2	28237.3	18299.8	17952.5	25076.4	17712.8	9141.05	8363.65	5387.84	1064.35	10186.1	CEP24827.1	Putative Cell Agglutination Protein C1289.15 Flags: Precursor, Partial
Trinity_DN56516_c1_g1_i1	3633.35	3066.26	3062	5080.89	3657.35	1290.47	1748.61	862.394	201.953	1572.66	XP_003282867.1	Hypothetical Protein Dicpudraft_146480
Trinity_DN56411_c1_g1_i1	1382.31	4671.12	2340.76	3429.2	2353.1	13167	3081.45	10693.2	20992.2	19430.3	AAZ29608.1	C-Type Lectin
Trinity_DN56365_c0_g1_i1	155.072	1484.25	542.187	830.503	837.769	5934.35	2769.86	5540.07	1311.33	773.513	WP_036066092.1	Hypothetical Protein
Trinity_DN56311_c2_g1_i5	1894.21	4478.13	3393.95	3867.29	2950.57	1176.87	1501.9	682.091	162.382	1502.44	EGT54950.1	Hypothetical Protein Caebren_32639
Trinity_DN56263_c0_g1_i2	61.6953	97.7647	46.272	63.383	58.4271	200.581	87.4797	170.948	208.776	129.29	ACR54103.1	Atp Synthase Subunit G
Trinity_DN56230_c2_g1_i2	4111.91	7214.27	5062.76	6251.61	5091.64	1480.02	2374.73	1258.72	287.92	2229.15	EGT54950.1	Hypothetical Protein Caebren_32639
Trinity_DN56209_c0_g1_i9	1939.23	2320.96	2167.74	3253.04	2786.6	773.114	1179.5	560.471	166.475	1203.74	EGT54950.1	Hypothetical Protein Caebren_32639
Trinity_DN56167_c0_g1_i1	2462.81	2169.87	3122.35	3487.93	4068.22	7483.17	4573.52	6297.86	12519.8	5972.99	ADK60919.1	Ubiquitin-Conjugating Enzyme E2
Trinity_DN56119_c0_g1_i2	792.034	953.523	579.406	1427.05	666.257	4250.5	714.582	2828.72	8632.15	2664.94		_
Trinity_DN56118_c1_g1_i2	355.998	1390.29	140.828	108.124	117.797	2915.24	3647.61	638.716	2810.97	2346.18	ACD11949.1	Hypothetical Protein
Trinity_DN56101_c0_g1_i2	68.365	132.046	40.2365	36.352	24.5017	243.424	208.379	242.389	85.9667	251.893		_
Trinity_DN56056_c2_g1_i3	2147.66	2549.5	2358.87	3336.93	2616.97	925.011	986.85	382.719	87.3312	1139.09	KRM61856.1	Hypothetical Protein Fc26_Gl001300
Trinity_DN56008_c0_g1_i1	1765.82	2673.93	2118.45	2269.67	2233.42	4702.3	3542.44	3661.35	8254.17	4294.45	XP_003142272.1	Hypothetical Protein Loag_06688
Trinity_DN55955_c0_g1_i1	175.915	245.047	171.005	466.051	255.383	1110.01	386.287	685.493	2523.05	640.879	AAN16375.1	Lysozyme
Trinity_DN55886_c2_g1_i1	1110.51	1267.13	1049.17	665.521	1373.04	2369.97	2755.12	2182.35	5407.71	2307.17	XP_002739473.1	Predicted: Failed Axon Connections Homolog
Trinity_DN55875_c1_g1_i2	579.435	591.667	464.732	405.465	413.701	1097.68	36157.6	428.646	319909	116605		_
Trinity_DN55826_c0_g1_i1	310.977	294.564	600.53	458.594	476.84	458.286	19927.7	650.623	120296	439.142		_
Trinity_DN55805_c3_g1_i1	1302.27	1301.41	731.299	1387.9	1549.26	1073.01	1845.92	7440.06	10964.2	2104.31		_
Trinity_DN55804_c1_g1_i1	531.079	855.759	542.187	712.126	655.891	1858.46	1646.39	880.254	1491.45	1192.59	XP_011419976.1	Predicted: 26S Proteasome Complex Subunit Dss1-Like
Trinity_DN55752_c0_g1_i2	2918.85	6094.42	4776.07	4606.45	3919.33	1332.02	1653.27	910.872	208.776	2026.29	EGT54950.1	Hypothetical Protein Caebren_32639
Trinity_DN55724_c0_g1_i1	1014.64	1430.92	878.162	2829.86	1222.26	6561.41	2131.95	3297.34	10553.4	4286.65	AAP13577.2	Lysozyme
Trinity_DN55671_c3_g1_i1	1578.23	2323.5	2590.23	1931.32	1423.92	1163.89	565.178	538.358	914.249	322.111		_
Trinity_DN55658_c0_g1_i2	14.1732	39.3598	15.0887	29.8273	22.6169	123.984	20.6413	136.078	195.131	27.8643		_
Trinity_DN55601_c2_g1_i1	137.564	35332.4	13557.7	267.513	247.844	529.69	223.123	134.377	362.97	307.622		_
Trinity_DN55555_c16_g2_i8	1.66744	2.53934	4.02365	1.8642	1.88474	0	1025.18	1.70097	2325.19	5.57286	XP_014369266.1	Predicted: Uncharacterized Protein Loc106719438, Partial
Trinity_DN55501_c0_g1_i1	891.246	5194.23	4579.92	2959.43	2420.95	967.204	1065.48	473.721	120.08	1351.98	KRM61856.1	Hypothetical Protein Fc26_Gl001300
Trinity_DN55494_c2_g1_i6	6767.3	8130.98	5368.56	4840.41	4113.46	1419	1862.63	1100.53	178.756	2197.94	XP_003282867.1	Hypothetical Protein Dicpudraft_146480
Trinity_DN55433_c1_g2_i1	10.0046	25.3934	32.1892	18.642	5.65423	33.7548	399.065	376.766	933.353	639.765		_
Trinity_DN55401_c0_g1_i2	2523.67	1978.15	1018.99	1220.12	1095.98	6641.25	1177.54	1814.94	18246.8	7142.18	ADN43412.1	Hemocyte Homeostasis-Associated Protein
Trinity_DN55391_c6_g1_i1	768.69	971.299	512.01	541.552	840.596	298.6	158.25	269.604	188.308	382.298	XP_012288919.1	Aminopeptidase N
Trinity_DN55293_c0_g2_i3	1901.71	2682.82	1754.31	1697.36	1785.8	4199.22	2960.55	4159.73	6904.63	3604.53	XP_014095225.1	Predicted: Uncharacterized Protein Loc106621058
Trinity_DN55253_c1_g1_i4	759.519	807.511	597.512	446.477	550.345	2137.59	1253.22	534.957	9067.44	3419.51	XP_013183307.1	Predicted: Uncharacterized Protein Loc106129326
Trinity_DN55239_c1_g1_i1	231.774	326.306	331.951	288.952	201.668	95.4221	115.984	131.826	81.873	168.3		_
Trinity_DN55227_c1_g1_i1	11.6721	16.5057	14.0828	23.3026	18.8474	57.7726	42.2655	29.7671	61.4048	63.5306	XP_014085676.1	Predicted: Nadh Dehydrogenase
Trinity_DN55201_c1_g1_i1	293.469	373.283	263.549	316.915	353.39	788.044	604.495	551.116	906.062	441.371	KDN35057.1	Hypothetical Protein Rsag8_11895, Partial
Trinity_DN55188_c1_g2_i1	7607.69	1852.45	49510	6495.82	2142.01	971.748	3236.75	702.503	1513.29	574.005	AKB96227.1	Heat Shock Protein
Trinity_DN55186_c2_g1_i2	36751.2	38156.2	21187.5	22687.4	23723.3	96578.9	41697.4	44880.2	417037	99695.2		_
Trinity_DN55125_c5_g1_i3	1945.9	2516.49	1703.01	1437.3	1492.72	3768.85	2668.62	1369.28	20249.9	8135.27		_
Trinity_DN55064_c1_g1_i1	2.50116	0	12.071	3.72841	0.942372	11.6843	38.3338	12.7573	28.6556	42.3538		_
Trinity_DN54937_c4_g2_i1	1637.43	6780.05	4301.28	3401.24	4175.65	1281.38	901.336	2041.17	2151.9	668.744	Q9U572.1	Clot_Penmo Recname: Full=Hemolymph Clottable Protein; Flags: Precursor
Trinity_DN54885_c1_g2_i1	3847.62	5345.32	3756.08	3739.6	1984.64	7087.2	7048.51	7166.21	13835.2	11044.3	AEP84099.1	Acyl-Coa-Binding Protein
Trinity_DN54784_c5_g2_i1	726.17	1283.64	885.203	718.651	757.667	373.899	344.021	399.729	277.004	298.705	KPJ04206.1	Putative E3 Ubiquitin-Protein Ligase Ie1
Trinity_DN54762_c0_g1_i5	117.554	101.574	103.609	198.538	219.573	71.4043	20889	193.911	46120.4	199.508		_
Trinity_DN54710_c1_g1_i1	58.3604	72.3713	22.1301	20.5063	27.3288	151.247	154.318	143.732	66.863	106.999		_
Trinity_DN54668_c0_g1_i10	22.5104	26.6631	40.2365	28.8952	50.8881	94.773	63.8897	66.338	132.361	179.446	CEH44534.1	Hypothetical Protein Xac3610_10050001
Trinity_DN54659_c1_g1_i1	4715.52	6286.14	743.37	5018.44	2058.14	15968.6	32882.6	19372.4	5380.42	8075.08	KNZ60973.1	Hypothetical Protein Vp01_1472G2
Trinity_DN54649_c0_g1_i1	6961.56	2234.62	3017.74	5406.19	3432.12	23212.9	6580.64	13777.9	53993.9	11978.3	XP_012559007.1	Predicted: Uncharacterized Protein Loc100199872
Trinity_DN54599_c1_g1_i6	4131.08	6309	3006.67	4427.49	5363.04	10031.7	13813	8317.77	20844.9	11197	WP_047493546.1	Histone
Trinity_DN54536_c1_g1_i2	4728.02	4225.47	4355.6	4739.74	4233.14	1087.29	2309.86	1774.12	2652.69	2329.46		_
Trinity_DN54529_c2_g1_i1	78.3697	778.309	1819.7	27.031	369.41	66136	1335.79	124.171	3542.37	39975.3	XP_011156887.1	Predicted: Trypsin-1-Like
Trinity_DN54521_c1_g1_i2	22.5104	36.8205	20.1183	25.1668	26.3864	123.984	82.5652	78.2448	38.2074	113.686		_
Trinity_DN54492_c0_g1_i2	130.894	426.61	125.739	171.507	115.912	514.111	575.99	373.364	554.008	585.151	ENN79154.1	Hypothetical Protein Yqe_04340, Partial
Trinity_DN54440_c1_g1_i3	374.34	578.97	403.371	329.032	303.444	157.09	217.225	160.742	40.9365	158.269	KOC65261.1	Plexin-B
Trinity_DN54349_c0_g2_i1	60.8615	245.047	48.2838	165.914	209.207	56.4743	32.4363	32.3185	32.7492	35.6663		_
Trinity_DN54346_c0_g1_i1	2095.97	2281.6	1410.29	1347.82	1375.86	5114.5	3629.92	2138.13	5552.36	9816.04	ACR78715.1	Polyprotein Pp3, Partial
Trinity_DN54301_c1_g3_i3	2284.39	1317.92	1918.28	1757.95	1609.57	610.182	712.616	988.266	908.791	722.243	XP_005079933.1	R3H Domain-Containing Protein 1 Isoform X1
Trinity_DN54253_c2_g2_i1	408.523	481.205	785.618	1039.29	1074.3	3126.86	2131.95	3111.93	20045.2	305.393	AAL78166.1	Transglutaminase
Trinity_DN54151_c2_g1_i10	258.453	201.878	232.366	279.631	195.071	79.1939	119.916	121.62	80.5085	143.78	CDJ83342.1	Similar To Piggybac-Derived 2 (Agap012114-Pa)
Trinity_DN54093_c0_g1_i4	9.17092	73.6409	715.204	33.5557	1014.94	45.4391	13.7609	11.9068	55.9466	12.2603	XP_008217767.1	Asparagine--Trna Ligase, Cytoplasmic
Trinity_DN54078_c1_g2_i3	1.66744	6.34836	7.04139	0	7.53898	238.88	1496	7389.88	474.864	5110.32	AHY86471.1	Hemocyanin Subunit L1, Partial
Trinity_DN54004_c1_g1_i1	857.898	671.656	432.543	227.433	250.671	641.99	6360.47	592.79	81692.9	21758.7		_
Trinity_DN53995_c0_g1_i2	25.0116	81.259	8.0473	783.898	1255.24	1.29826	21.6242	22.1127	38.2074	11.1457		_
Trinity_DN53954_c0_g1_i2	0	1.26967	23.136	3.72841	1.88474	135.668	6.88043	9.35536	36.8429	118.145		_
Trinity_DN53943_c1_g1_i1	154.238	134.585	124.733	151.001	107.43	64.2639	49.1459	50.1788	45.0302	54.6141		_
Trinity_DN53892_c15_g1_i1	450.209	1075.41	857.038	4828.29	981.952	10152.4	24385.2	2533.6	31566.2	278.643	ABB73282.1	Reverse Transcriptase, Partial
Trinity_DN53870_c2_g2_i4	4617.97	1612.48	24082.6	3601.64	725.627	29.2109	377.441	233.034	13.6455	40.1246		_
Trinity_DN53866_c2_g1_i1	1087.17	1894.35	2066.15	127.698	13.1932	42.8426	46.1972	22.9632	64.1339	114.801	XP_027214936.1	Cytochrome P450 3A13-Like
Trinity_DN53862_c8_g2_i1	0	0	0	0	0	5.19304	3.93167	296.82	19.1037	167.186	EFX65941.1	Hypothetical Protein Dappudraft_332703
Trinity_DN53713_c2_g1_i1	2.50116	528.183	526.092	16.7778	16.0203	12.9826	13.7609	18.7107	8.1873	15.604		_
Trinity_DN53693_c3_g3_i1	5.00232	58.4049	62.3666	122.105	29.2135	18.1756	9.82919	6.8039	8.1873	6.68744		_
Trinity_DN53664_c0_g2_i1	18.3418	38.0901	28.1656	57.7904	13.1932	5.19304	9.82919	11.9068	2.7291	6.68744		_
Trinity_DN53619_c0_g1_i1	25.0116	12.6967	14.0828	14.9136	13.1932	82.4395	410.86	20.4117	1717.97	810.294		_
Trinity_DN53558_c2_g5_i2	333.488	302.182	370.176	351.403	263.864	90.8782	122.865	153.938	53.2175	212.883	CDQ77565.1	Unnamed Protein Product
Trinity_DN53258_c1_g1_i1	110.051	76.1803	89.5263	147.272	142.298	30.5091	59.958	56.9827	27.291	51.2703		_
Trinity_DN53240_c7_g1_i1	136.73	307.26	222.307	230.229	167.742	83.0887	71.7531	58.6836	38.2074	60.1869	XP_013416627.1	Krueppel-Like Factor 9
Trinity_DN53196_c0_g1_i5	259.287	474.857	265.561	324.372	250.671	125.931	99.2748	136.078	49.1238	149.353	EFX67223.1	Hypothetical Protein Dappudraft_331275
Trinity_DN53155_c2_g1_i1	26.679	40.6295	50.2956	585.36	550.345	30.5091	26.5388	16.1593	21.8328	10.0312	XP_642871.1	Hypothetical Protein Ddb_G0276785
Trinity_DN52967_c0_g1_i1	72.5336	392.328	346.034	276.834	328.888	139.563	22.6071	42.5244	54.582	44.5829		_
Trinity_DN52946_c1_g1_i1	284.298	392.328	600.53	123.97	20.7322	68.1587	60.9409	29.7671	40.9365	22.2915	KOB65432.1	Cyp6U1
Trinity_DN52870_c1_g3_i1	325.151	646.263	197.159	184.556	58.4271	174.616	181.84	1954.42	1678.4	4955.39		_
Trinity_DN52865_c0_g1_i1	216.767	2183.83	2019.87	1017.86	2441.69	257.056	178.891	455.011	210.141	397.902		_
Trinity_DN52665_c4_g2_i1	10230.6	1363.63	53634.3	6084.76	1520.05	245.371	2710.89	434.599	631.787	62.4161	ACN38704.1	Heat Shock Protein 70
Trinity_DN52659_c0_g1_i1	238.444	571.352	294.732	397.076	250.671	89.58	153.335	149.686	55.9466	137.092	XP_006623889.1	Uncharacterized Protein Loc102677948, Partial
Trinity_DN52652_c1_g2_i1	619.454	705.937	528.104	2341.44	2554.77	497.234	150.387	373.364	294.743	405.704	XP_004921552.1	Probable G-Protein Coupled Receptor Mth-Like 1
Trinity_DN52549_c7_g2_i5	496.063	547.228	257.514	425.971	637.986	151.896	202.481	168.396	174.662	244.091	KOF69527.1	Hypothetical Protein Ocbim_22004669Mg
Trinity_DN52529_c3_g1_i1	195.924	247.586	285.679	247.007	146.068	96.7204	71.7531	92.7031	42.3011	118.145		_
Trinity_DN52491_c0_g1_i1	349.329	554.846	670.944	737.293	789.708	120.089	105.172	356.354	137.82	39.01	XP_013185473.1	Toll-Like Receptor 6
Trinity_DN52406_c2_g1_i11	581.936	664.038	403.371	288.02	442.915	1178.17	14963	840.281	135006	49163.8		_
Trinity_DN52205_c1_g3_i1	1707.46	2827.56	3977.38	3010.69	4593.12	14660	6727.09	14334.1	43731.1	683.233	AAL78166.1	Transglutaminase
Trinity_DN52196_c0_g2_i6	140.899	45.7082	965.676	156.593	184.705	7.78956	35.3851	116.517	24.5619	15.604		_
Trinity_DN52176_c0_g1_i1	216.767	119.349	90.5322	90.4139	94.2372	43.4917	57.0093	36.571	51.8529	57.9578		_
Trinity_DN52126_c3_g2_i1	10581.6	16620	6651.1	10203.7	12204.7	21462.8	31121.2	18414.8	42231.5	28301.2	AKR04375.1	Histone H1
Trinity_DN52059_c2_g1_i3	245.114	319.957	207.218	307.594	326.061	76.5974	117.95	76.5439	54.582	182.79	XP_004031989.1	Hypothetical Protein Img5_133010
Trinity_DN51771_c0_g1_i1	732.84	120.619	266.567	570.447	403.335	1944.79	551.417	1422.87	2860.1	1587.15		_
Trinity_DN51723_c3_g3_i1	546.086	716.095	512.01	621.712	501.342	290.81	248.678	166.696	152.83	287.56		_
Trinity_DN51689_c2_g1_i1	70.0325	66.0229	100.591	173.371	151.722	32.4565	20.6413	72.2914	16.3746	24.5206	KFQ37761.1	Hypothetical Protein N332_09774, Partial
Trinity_DN51686_c7_g1_i3	68.365	100.304	68.4021	56.8582	74.4474	61.6674	1535.32	1059.71	88.6958	689.92	EFN81652.1	Epidermal Growth Factor Receptor Substrate 15-Like 1
Trinity_DN51570_c3_g2_i1	28802.5	46679.5	58978.7	14688.1	2382.32	5397.52	5620.33	3810.18	7514.58	3904.35	NP_001137200.1	Cytochrome P450 Monooxygenase
Trinity_DN51547_c0_g1_i12	402.687	591.667	635.737	946.084	770.861	275.88	212.31	204.117	87.3312	403.475	XP_013384971.1	Collagen Alpha-1(Iv) Chain-Like
Trinity_DN51513_c0_g1_i1	549.421	841.792	597.512	437.156	251.613	185.002	270.303	257.698	99.6122	198.394	XP_013190773.1	Protein Extra-Macrochaetae
Trinity_DN51470_c1_g5_i1	15.007	10.1574	4.02365	7.45682	3.76949	38.9478	9.82919	90.1517	24.5619	24.5206	BAM35674.1	Putative Reverse Transcriptase
Trinity_DN51447_c1_g1_i17	36.6837	60.9442	72.4257	53.1298	79.1593	16.8774	17.6925	32.3185	13.6455	11.1457	XP_013786777.1	F-Box Protein At1G78280-Like
Trinity_DN51376_c1_g1_i2	215.1	1394.1	215.265	551.805	335.485	6803.53	580.905	3743.85	3167.12	1069.99		_
Trinity_DN51343_c0_g1_i2	1252.25	1004.31	416.448	419.446	417.471	2906.16	422.655	694.848	22049.8	2681.66	ADN43412.1	Hemocyte Homeostasis-Associated Protein
Trinity_DN51226_c0_g2_i1	494.396	639.914	816.801	781.102	834	225.248	432.484	350.401	236.067	303.164	KDR17240.1	Gram Domain-Containing Protein 1B
Trinity_DN51147_c0_g1_i1	0	0	0	0	0	11.6843	27.5217	474.572	2.7291	242.977	KKF21718.1	Von Willebrand Factor A Domain-Containing Protein 7
Trinity_DN50999_c0_g1_i2	0	0	0	0	0	0	6.88043	23.8136	21.8328	69.1035	XP_014511078.1	Predicted: Embryonic Protein Dc-8-Like
Trinity_DN50962_c1_g1_i1	0	2.53934	4.02365	0	0	18.1756	5.89751	13.6078	103.706	4.45829	AAL78166.1	Transglutaminase
Trinity_DN50944_c1_g1_i1	668.643	501.52	275.62	181.76	234.651	793.886	1078.26	501.788	8285.55	3099.63		_
Trinity_DN50849_c0_g3_i4	308.476	912.894	425.501	549.94	526.786	218.108	310.602	220.276	143.278	220.685	KOC60786.1	Myc Proto-Oncogene Protein
Trinity_DN50758_c0_g2_i5	85.0394	170.136	64.3784	64.3151	67.8508	12.9826	43.2484	12.7573	13.6455	26.7497	EFX69031.1	Hypothetical Protein Dappudraft_259237
Trinity_DN50732_c0_g1_i1	621.121	924.321	796.683	1047.68	1730.2	7126.15	1520.57	4352.79	9068.8	748.993	ACF93414.1	Single Ib Domain Protein
Trinity_DN50717_c2_g1_i1	60.8615	52.0565	41.2424	17.7099	32.0407	118.791	142.523	106.311	111.893	121.488		_
Trinity_DN50712_c0_g4_i2	4035.2	2317.15	33287.7	2547.44	554.115	22.7196	446.245	146.284	19.1037	24.5206		_
Trinity_DN50622_c4_g2_i2	515.239	728.791	497.927	388.687	462.705	1228.15	900.353	1158.36	1075.27	1249.44	EFX80638.1	Hypothetical Protein Dappudraft_318250
Trinity_DN50572_c0_g1_i1	181.751	234.889	201.183	322.507	300.617	99.9661	143.506	122.47	113.258	84.7075	XP_013398292.1	Phosphatidylinositol 3,4,5-Trisphosphate 3-Phosphatase Tpte2-Like Isoform X1
Trinity_DN50425_c0_g1_i4	93.3766	137.125	49.2897	84.8213	72.5627	20.123	11.795	44.2253	32.7492	34.5518	XP_012809043.1	Neuroblast Differentiation-Associated Protein Ahnak
Trinity_DN50400_c0_g1_i2	260.954	25.3934	16.0946	244.211	11.3085	26.6143	13.7609	19.5612	9.55185	8.91658	XP_001809957.2	Sortilin-Related Receptor
Trinity_DN50343_c0_g1_i3	41.686	81.259	72.4257	205.063	54.6576	21.4213	41.2826	26.3651	27.291	20.0623	EZA51692.1	Acetylcholine Receptor Subunit Alpha-Like Protein
Trinity_DN50319_c0_g3_i1	26.679	50.7869	17.1005	210.655	80.1017	384.285	412.826	392.925	856.938	144.894		_
Trinity_DN50261_c1_g1_i4	5269.11	2004.81	21204.6	2419.74	1320.26	670.552	1277.79	705.054	1431.41	407.934	AGV07535.1	Heat Shock Protein 70 Form 2, Partial
Trinity_DN50252_c0_g1_i1	661.973	524.374	4522.58	911.596	176.224	14.2809	63.8897	122.47	2.7291	16.7186		_
Trinity_DN50140_c3_g1_i5	2361.09	2713.29	2063.13	1441.03	2223.06	806.869	902.319	1391.4	661.807	1211.54	XP_014260770.1	Solute Carrier Organic Anion Transporter Family Member 3A1-Like
Trinity_DN50138_c0_g1_i1	992.96	2214.31	1732.18	976.843	1120.48	715.342	343.039	583.434	178.756	561.745	XP_002404032.1	6-Phosphofructo-2-Kinase/Fructose 2,6-Bisphosphatase
Trinity_DN50102_c3_g1_i4	470.218	498.981	284.673	575.107	402.393	161.633	120.899	113.115	91.4249	198.394	EHH17232.1	Hypothetical Protein Egk_13580, Partial
Trinity_DN50077_c4_g3_i1	988.792	737.679	783.606	427.835	511.708	354.425	254.576	247.492	229.245	283.101		_
Trinity_DN50062_c3_g1_i1	100.046	360.587	57.337	488.422	100.834	13.6317	94.3602	26.3651	16.3746	42.3538	XP_002424189.1	Predicted Protein
Trinity_DN50056_c2_g3_i1	346.827	478.666	485.856	641.286	884.888	1077.56	3614.19	934.686	2610.39	839.273	XP_013387692.1	Predicted: Methionine Synthase-Like
Trinity_DN50022_c2_g3_i1	20.0093	12.6967	16.0946	26.0989	9.42372	6.4913	1.96584	3.40195	0	2.22915	XP_001605896.2	Solute Carrier Organic Anion Transporter Family Member 5A1
Trinity_DN49765_c0_g1_i1	573.599	346.62	630.707	778.306	223.342	192.143	145.472	156.49	161.017	154.926	XP_011313787.1	Alpha-Aminoadipic Semialdehyde Synthase
Trinity_DN49759_c2_g1_i2	0	0	0	0	0	0	106.155	0	266.087	0		_
Trinity_DN49701_c7_g1_i2	279.296	625.948	396.33	336.489	321.349	127.23	180.857	147.985	57.3111	130.405	KFM69036.1	Hypothetical Protein X975_06281, Partial
Trinity_DN49678_c2_g1_i3	129.227	144.743	114.674	109.988	84.8135	50.6322	66.8385	47.6273	46.3947	24.5206	XP_002428969.1	Hypothetical Protein Phum_Phum412540
Trinity_DN49476_c0_g1_i2	90.8755	76.1803	125.739	20.5063	56.5423	209.669	500.306	54.4312	1847.6	196.165	XP_008486805.1	Predicted: Basic Proline-Rich Protein-Like, Partial
Trinity_DN49034_c0_g1_i2	249.282	88.877	73.4316	823.046	22.6169	54.5269	31.4534	79.9458	13.6455	22.2915	AFA42361.1	Clip Domain Serine Proteinase 3
Trinity_DN48878_c0_g1_i1	42.5197	115.54	86.5085	165.914	47.1186	41.5443	15.7267	22.1127	10.9164	42.3538	XP_008330704.1	Coiled-Coil Domain-Containing Protein 147
Trinity_DN48710_c4_g1_i1	19.1756	34.2811	6.03548	30.7594	20.7322	0	0.982919	1.70097	2.7291	4.45829	ACN40429.1	Unknown
Trinity_DN48612_c4_g1_i1	0	2.53934	0	3.72841	1.88474	17.5265	19.6584	202.416	0	71.3326	EFX72698.1	Hypothetical Protein Dappudraft_200882
Trinity_DN48547_c1_g1_i1	17.5081	21.5844	27.1596	655.268	1068.65	25.9652	16.7096	17.8602	32.7492	4.45829	AFA43700.1	X-Box Binding Protein 1
Trinity_DN48492_c1_g1_i3	1427.33	1329.35	1564.19	2275.26	1536.07	666.657	625.136	728.868	504.884	827.013	XP_013384700.1	Ferm Domain-Containing Protein 4A-Like Isoform X6
Trinity_DN48378_c6_g1_i2	802.038	623.409	675.973	499.607	411.817	240.827	254.576	283.212	210.141	378.955	XP_010752116.1	Low Quality Protein: Zinc Finger Ccch Domain-Containing Protein 13
Trinity_DN48363_c0_g1_i1	8.3372	20.3147	8.0473	18.642	35.8101	51.9304	80.5993	25.5146	188.308	113.686		_
Trinity_DN47897_c0_g1_i1	138.397	170.136	131.775	177.099	290.251	826.992	550.434	1027.39	2817.8	115.916	AIE45536.1	Prophenoloxidase 2-Like Protein
Trinity_DN47743_c2_g3_i2	7.50348	38.0901	32.1892	27.9631	16.9627	105.159	71.7531	24.6641	341.138	105.884	KKF21940.1	Carbohydrate Sulfotransferase 12
Trinity_DN47732_c4_g1_i5	4.1686	931.939	785.618	1321.72	166.8	7.78956	1.96584	2.55146	2.7291	2.22915		_
Trinity_DN47578_c7_g2_i1	906.253	802.432	831.89	939.559	1023.42	128.528	517.015	411.636	248.348	473.693		_
Trinity_DN47538_c0_g1_i1	80.0371	27.9328	48.2838	410.125	54.6576	5.19304	51.1118	11.9068	2.7291	26.7497	XP_968019.1	Cell Wall Protein Dan4 Isoform X2
Trinity_DN47360_c1_g1_i1	471.052	534.532	517.039	480.033	421.24	149.949	232.952	240.688	121.445	325.455	CDQ69651.1	Unnamed Protein Product
Trinity_DN47350_c0_g1_i1	118.388	223.462	149.881	136.087	151.722	44.1409	102.224	51.8797	69.5921	59.0723	XP_011774504.1	Hypothetical Protein, Unlikely
Trinity_DN47313_c0_g1_i1	3.33488	15.2361	5.02956	1.8642	4.71186	176.563	920.012	5077.41	451.666	3176.53	AEB77775.1	Hemocyanin
Trinity_DN47170_c0_g1_i2	58.3604	50.7869	83.4908	128.63	81.9864	33.7548	35.3851	24.6641	39.572	23.406	ERE69653.1	Transcription Initiation Factor Tfiid Subunit 3
Trinity_DN47084_c0_g4_i1	1139.69	402.486	556.27	617.984	1509.68	6516.62	1062.53	876.852	6195.06	5595.15	EKC42792.1	C-Type Mannose Receptor 2
Trinity_DN47060_c6_g1_i9	378.509	858.298	530.116	535.959	506.054	271.336	334.192	251.744	141.913	224.029	XP_014279236.1	Tyrosine-Protein Phosphatase Lar Isoform X4
Trinity_DN46861_c2_g1_i1	8.3372	5.07869	14.0828	20.5063	11.3085	22.7196	27.5217	290.016	24.5619	329.913	EWM26413.1	Hypothetical Protein Naga_101468G1, Partial
Trinity_DN46775_c2_g1_i3	5259.1	8350.63	4183.59	2802.83	3932.52	3313.16	1208.01	1572.55	1163.96	1870.25	EFX82963.1	Hypothetical Protein Dappudraft_302120
Trinity_DN46739_c0_g2_i1	138.397	204.417	354.081	529.434	196.956	30.5091	63.8897	62.9361	30.0201	55.7286	EFX79494.1	Putative Positive Regulatory Domain/B-Lymphocyte Induced Maturation Protein 1, Version A
Trinity_DN46709_c0_g1_i5	864.567	568.813	2871.88	459.527	336.427	217.459	293.893	220.276	354.783	114.801	CAL68989.1	Heat Shock Protein 70 Kda
Trinity_DN46689_c0_g1_i1	12086.4	2692.97	37844.5	5678.37	1447.48	1350.84	2854.4	1229.8	2718.18	657.598	KDR13799.1	Dnaj Protein-Like Protein 1
Trinity_DN46559_c0_g2_i1	261.788	298.373	69.408	181.76	155.491	1361.23	141.54	262.801	14069.9	937.356	ADG86240.1	Triosephosphate Isomerase
Trinity_DN46306_c0_g1_i1	471.885	552.307	474.791	580.7	437.261	140.212	189.703	200.715	79.1439	270.841		_
Trinity_DN46113_c3_g1_i1	1.66744	2.53934	4.02365	3.72841	0	5.19304	357.782	11.9068	1105.29	5.57286		_
Trinity_DN45997_c1_g2_i1	150.07	233.62	223.313	255.396	140.413	57.7726	77.6506	87.6002	39.572	132.634	XP_014480586.1	Protein Split Ends-Like
Trinity_DN45869_c4_g1_i1	20.843	52.0565	18.1064	45.673	46.1762	12.9826	1.96584	3.40195	16.3746	4.45829	XP_010336509.1	Low Quality Protein: Basic Proline-Rich Protein-Like, Partial
Trinity_DN45830_c2_g1_i2	1015.47	1648.03	1528.99	1629.32	1518.16	767.272	969.158	658.277	555.372	495.985	AGZ84433.1	Camp-Responsive Element Binding Protein, Partial
Trinity_DN45803_c0_g2_i1	41.686	87.6073	41.2424	21.4384	32.983	202.529	130.728	3385.79	335.679	3067.3	CAA68066.1	Cathepsin L
Trinity_DN45686_c0_g3_i2	308.476	236.159	136.804	251.668	142.298	481.005	633.982	2099.85	590.85	1662.94	BAF51711.1	Tick Legumain
Trinity_DN45529_c3_g4_i1	1114.68	886.231	1048.16	1584.57	2228.71	506.971	442.313	650.623	560.83	469.235	XP_013785716.1	Thiosulfate Sulfurtransferase/Rhodanese-Like Domain-Containing Protein 3
Trinity_DN45339_c0_g1_i1	636.128	1108.42	462.72	668.317	815.152	296.653	350.902	318.933	159.652	401.246	CDQ98416.1	Unnamed Protein Product, Partial
Trinity_DN44976_c2_g1_i2	402.687	655.15	213.254	197.606	318.522	100.615	105.172	108.862	46.3947	93.6241	XP_001608209.2	Aminopeptidase N-Like
Trinity_DN44937_c0_g1_i2	80.8708	133.315	76.4494	81.0929	62.1966	11.6843	25.5559	42.5244	16.3746	32.3226	XP_003150565.1	Hypothetical Protein Loag_15025
Trinity_DN44876_c0_g1_i1	44.1871	55.8655	60.3548	51.2656	38.6373	16.8774	17.6925	22.1127	19.1037	4.45829	XP_013406000.1	Transient Receptor Potential Cation Channel Subfamily A Member 1 Homolog Isoform X1
Trinity_DN44848_c0_g1_i1	0	0	0	0	0	13.6317	60.9409	260.249	10.9164	202.852	KRY98163.1	Hypothetical Protein T11_10141, Partial
Trinity_DN44831_c0_g1_i1	579.435	394.868	446.625	565.786	506.996	122.686	171.028	237.286	130.997	225.144		_
Trinity_DN44713_c0_g1_i3	0	5.07869	0	0	0	7.78956	13.7609	341.045	23.1974	366.694	WP_006860061.1	Pt Repeat Family Protein
Trinity_DN44526_c0_g2_i1	232.608	429.149	350.058	1917.33	150.78	175.914	175.942	146.284	51.8529	100.312	ABCG5	Atp-Binding Cassette Sub-Family G Member 5
Trinity_DN44454_c0_g1_i3	53.3581	69.8319	35.207	91.346	40.522	30.5091	10.8121	14.4583	2.7291	20.0623	EFA02811.1	Eyegone
Trinity_DN44355_c0_g2_i1	0	2.53934	0	0	0	85.0361	437.399	1364.18	141.913	1385.41	AEB77775.1	Hemocyanin
Trinity_DN44181_c0_g1_i2	260.954	88.877	50.2956	87.6176	24.5017	403.759	143.506	723.765	1121.66	101.426	EGX54474.1	Hypothetical Protein Szn_37783, Partial
Trinity_DN44171_c0_g1_i4	2319.41	79.9893	99.5854	2892.31	82.9288	130.475	56.0264	97.806	21.8328	54.6141	EGD17169.1	Hypothetical Protein Xga_4248
Trinity_DN44109_c0_g1_i1	31.6814	133.315	44.2602	62.4509	50.8881	9.08782	13.7609	25.5146	0	11.1457		_
Trinity_DN44034_c0_g1_i1	43.3534	1119.85	355.087	438.088	310.041	1146.36	501.288	1941.66	6182.78	5221.77	ADZ96217.1	Jhe-Like Carboxylesterase 1
Trinity_DN43964_c0_g1_i1	356.832	24.1238	36.2129	295.476	348.678	9.08782	32.4363	41.6739	32.7492	39.01	AGI99530.1	Mitochondrial Manganese Superoxide Dismutase
Trinity_DN43940_c0_g1_i2	15.007	5.07869	9.05322	7.45682	11.3085	75.9482	85.5139	695.699	50.4884	1023.18	ABB03697.1	Hepatopancreas Kazal-Type Proteinase Inhibitor 1A1
Trinity_DN43840_c3_g1_i1	1162.21	1842.29	1057.21	2061.81	2064.74	483.602	717.531	456.712	633.152	715.556	KFM81017.1	Microtubule-Associated Proteins 1A/1B Light Chain 3C, Partial
Trinity_DN43796_c2_g1_i5	2666.24	4492.1	3240.05	4619.5	4281.2	1741.62	1448.82	2258.89	1176.24	2262.58	AKA62189.1	Nf-Kb Transcription Factor Relish
Trinity_DN43785_c0_g1_i1	8.3372	8.8877	18.1064	3.72841	25.4441	12.3335	21.6242	278.109	126.903	39.01	EFX89258.1	Hypothetical Protein Dappudraft_303131
Trinity_DN43473_c0_g1_i4	1.66744	12.6967	2.01183	1.8642	0	20.7722	267.354	1.70097	19.1037	41.2392	BAO00967.1	Neuropeptide Like Precursor 3-Like
Trinity_DN43341_c0_g1_i1	15.007	27.9328	6.03548	4.66051	5.65423	136.317	190.686	28.9166	152.83	32.3226	EMT05457.1	Hypothetical Protein F775_24688
Trinity_DN43283_c0_g1_i3	3.33488	17.7754	6.03548	0	3.76949	960.064	2058.23	12117.7	705.473	9343.46	ACQ45455.1	Trypsin-Like Serine Proteinase 2
Trinity_DN43121_c0_g1_i1	364.336	2626.95	639.761	446.477	548.461	231.09	285.046	261.1	120.08	75.7909		_
Trinity_DN43098_c5_g1_i8	143.4	257.743	134.792	72.704	115.912	42.8426	46.1972	43.3749	13.6455	21.1769	CAB62280.1	Hydroxyproline-Rich Glycoprotein Dz-Hrgp
Trinity_DN43093_c0_g1_i2	64.1964	15.2361	8.0473	421.31	18.8474	10.3861	11.795	15.3088	19.1037	15.604	CEL65391.1	Tpa: Mucin Family Glycoprotein
Trinity_DN42994_c1_g1_i1	494.396	179.024	1675.85	262.853	98.9491	19.4739	27.5217	101.208	8.1873	0		_
Trinity_DN42813_c0_g1_i1	340.158	248.856	2235.14	492.15	499.457	32.4565	115.984	246.641	60.0402	11.1457		_
Trinity_DN42753_c0_g1_i1	0	5.07869	0	0	7.53898	131.124	827.617	4080.64	185.579	2596.95	AHY86472.1	Hemocyanin Subunit L2, Partial
Trinity_DN42725_c0_g2_i1	132.561	57.1352	84.4967	181.76	110.258	209.669	319.449	311.278	283.827	326.57		_
Trinity_DN42628_c0_g1_i1	267.624	399.946	577.394	568.582	261.037	1248.93	2054.3	678.689	1486	625.275	EFX79132.1	Hypothetical Protein Dappudraft_225197
Trinity_DN42546_c3_g2_i2	3375.73	1063.98	10952.4	1609.74	428.779	258.354	618.256	318.933	147.371	205.081	XP_013774725.1	Hsp70-Binding Protein 1-Like Isoform X1
Trinity_DN42398_c0_g2_i1	638.629	2180.03	1064.26	759.664	1360.79	400.513	282.098	420.141	623.6	362.236		_
Trinity_DN42375_c3_g1_i1	3885.97	4848.88	2814.54	1103.61	5032.27	9842.11	9980.55	8305.01	16577.9	8437.31	EFX86930.1	Gst-N-Metaxin-Like Protein
Trinity_DN42291_c1_g5_i1	1844.19	3486.52	2088.28	2035.71	1684.96	657.569	1387.88	659.978	1269.03	629.734		_
Trinity_DN42287_c0_g2_i1	0.83372	3.80901	4.02365	1.8642	0	11.6843	12.7779	154.789	8.1873	80.2492		_
Trinity_DN42221_c0_g2_i1	115.053	133.315	47.2779	137.951	68.7932	384.285	327.312	433.749	388.897	112.572	WP_045060218.1	Hypothetical Protein
Trinity_DN42164_c0_g1_i1	30.0139	55.8655	72.4257	177.099	30.1559	11.0352	5.89751	30.6175	5.4582	13.3749	KDR17787.1	A Disintegrin And Metalloproteinase With Thrombospondin Motifs 18
Trinity_DN42029_c0_g1_i1	71.6999	7.61803	14.0828	65.2472	16.0203	0	1.96584	3.40195	0	4.45829		_
Trinity_DN41987_c0_g1_i1	79.2034	0	12.071	333.693	3.76949	0.64913	0	1.70097	0	0	XP_012261621.1	Mucin-5Ac-Like
Trinity_DN41934_c0_g1_i2	23.3442	142.203	33.1951	38.2162	43.3491	242.126	121.882	312.979	1125.75	56.8432	KDQ88522.1	Hypothetical Protein L798_06649
Trinity_DN41882_c0_g1_i2	5.00232	64.7532	17.1005	65.2472	28.2712	5.19304	7.86335	5.10292	2.7291	6.68744	XP_003885261.1	Collagen Alpha-1(Iii) Chain (Precursor), Related
Trinity_DN41870_c0_g1_i1	1.66744	7.61803	0	0	0	23.3687	27.5217	271.305	54.582	274.185		_
Trinity_DN41581_c0_g1_i1	5.83604	83.7983	92.544	26.0989	22.6169	543.322	729.326	6523.24	316.576	3883.17	ASPP	Lysosomal Aspartic Protease
Trinity_DN41523_c0_g1_i2	203.428	586.588	259.526	194.809	240.305	94.1239	121.882	159.041	40.9365	92.5095	EFX90292.1	Hypothetical Protein Dappudraft_309832
Trinity_DN41491_c0_g1_i2	0	0	2.01183	0	0	1.29826	167.096	1382.89	30.0201	36.7809	CAB63874.1	L1332.3A
Trinity_DN41372_c0_g1_i1	175.915	110.461	72.4257	134.223	50.8881	431.672	57.9922	609.799	2136.89	56.8432		_
Trinity_DN41231_c0_g1_i1	0	2.53934	2.01183	3.72841	3.76949	7.14043	23.59	193.911	23.1974	189.477	ALM09356.1	Glutathione Peroxidase 3
Trinity_DN41228_c0_g1_i1	6.66976	15.2361	8.0473	11.1852	2.82712	31.1583	84.531	1649.09	166.475	306.507		_
Trinity_DN41225_c0_g1_i2	0	1.26967	0	0	1.88474	11.6843	10.8121	113.115	10.9164	64.6452	ACG70181.1	Cathepsin D-Like Protein
Trinity_DN41157_c0_g1_i1	245.947	417.722	406.389	562.058	489.091	151.896	211.327	175.2	150.101	267.497	XP_002954239.1	Hypothetical Protein Volcadraft_102187
Trinity_DN40961_c1_g1_i1	4876.43	4037.56	3398.98	5771.58	6023.64	10969.7	13832.6	9038.13	14097.2	8105.17	AEB54627.1	Trap
Trinity_DN40935_c0_g1_i1	192.589	144.743	77.4553	38.2162	9.42372	214.862	604.495	6115	141.913	1715.33	ABY70643.1	Chitinase Precursor
Trinity_DN40933_c0_g1_i1	93.3766	210.765	139.822	445.545	83.8711	33.7548	94.3602	35.7205	13.6455	62.4161		_
Trinity_DN40861_c0_g2_i2	1544.05	1321.73	1552.12	1267.66	1291.99	3690.95	2793.45	3549.93	4474.36	2327.23	XP_013385782.1	Predicted: Dehydrogenase/Reductase Sdr Family Member 11-Like Isoform X2
Trinity_DN40820_c0_g2_i2	3.33488	15.2361	13.0769	3.72841	17.9051	14.93	18.6755	205.818	62.7693	288.674	ADE58567.1	Gh5 Family Protein Gh5A
Trinity_DN40818_c0_g1_i1	132.561	195.529	160.946	174.303	119.681	46.7374	69.7872	91.0021	30.0201	75.7909		_
Trinity_DN40813_c0_g1_i1	1.66744	2.53934	2.01183	3.72841	0	64.2639	72.736	508.591	27.291	412.392	EKC25506.1	Vitelline Membrane Outer Layer Protein 1
Trinity_DN40798_c0_g1_i1	110.885	192.99	156.922	111.852	45.2339	314.179	294.876	243.239	526.717	403.475	ACU82846.1	Acyl-Coa-Binding Protein
Trinity_DN40733_c0_g1_i1	100.046	154.9	18.1064	37.2841	94.2372	1465.09	31.4534	79.9458	1934.93	128.176	XP_005511633.1	Predicted: Low Quality Protein: Phosphatidylinositol Phosphatase Ptprq
Trinity_DN40721_c0_g1_i1	23.3442	7.61803	0	3.72841	0	18.1756	27.5217	217.725	158.288	33.4372	KDR06530.1	Sialin
Trinity_DN40681_c0_g1_i1	0	0	0	0	0	7.78956	21.6242	74.8429	8.1873	89.1658		_
Trinity_DN40665_c0_g1_i3	0	0	2.01183	1.8642	0	22.7196	28.5046	419.29	8.1873	277.529	AAT01142.1	Proteoliaisin
Trinity_DN40603_c0_g1_i1	2.50116	5.07869	0	9.32102	0	10.3861	33.4192	1301.25	10.9164	246.321	ADG22162.1	Chitinase 1 Precursor
Trinity_DN40585_c0_g1_i1	18.3418	63.4836	10.0591	62.4509	35.8101	234.985	39.3167	164.995	342.502	57.9578		_
Trinity_DN40486_c0_g1_i1	11.6721	5.07869	1.00591	1.8642	16.0203	151.247	260.473	1241.71	87.3312	1683	EFX80631.1	Hypothetical Protein Dappudraft_303899
Trinity_DN40449_c1_g2_i1	2252.71	27974.7	1036.09	21142.9	904.677	3336.53	662.487	1308.9	500.79	940.699	ABW87872.1	Serine Protease
Trinity_DN40424_c0_g1_i2	15.007	7.61803	10.0591	11.1852	3.76949	19.4739	17.6925	127.573	79.1439	99.197	EFX74564.1	Endoribonuclease-Like Protein
Trinity_DN40417_c0_g1_i1	31.6814	78.7196	26.1537	24.2347	7.53898	10.3861	5.89751	6.8039	0	6.68744	WP_051551163.1	Hypothetical Protein
Trinity_DN40385_c0_g2_i1	559.426	976.377	1059.23	637.558	864.155	2255.73	1737.8	1631.23	3410.01	1007.57	XP_001655229.1	Aael002418-Pa
Trinity_DN40143_c0_g1_i1	365.169	529.453	362.129	384.958	499.457	836.729	711.633	916.825	1131.21	715.556	XP_002014760.1	Gl18776
Trinity_DN40130_c0_g1_i1	0	2.53934	2.01183	0	0	5.19304	11.795	53.5807	0	49.0412		_
Trinity_DN40051_c0_g1_i2	110.885	35.5508	60.3548	48.4693	52.7729	5.19304	27.5217	28.9166	5.4582	11.1457		_
Trinity_DN40040_c0_g2_i1	0	0	6.03548	0	1.88474	28.5617	26.5388	1.70097	38.2074	8.91658		_
Trinity_DN39934_c0_g1_i1	83.372	176.484	77.4553	297.341	133.817	764.675	209.362	411.636	665.901	360.007	AAP13578.1	Lysozyme
Trinity_DN39833_c0_g1_i2	933.766	1306.49	757.452	2188.58	1086.56	5676.64	855.139	3515.06	11978	3183.22		_
Trinity_DN39812_c0_g1_i1	35.8499	66.0229	148.875	96.0066	64.0813	292.109	321.414	335.942	732.764	62.4161	AFY05648.1	Copper-Induced Metallothionein
Trinity_DN39697_c0_g1_i1	0	0	0	0	0	40.2461	83.5481	384.42	60.0402	506.016	AAK61484.1	Glycoprotein Gp2
Trinity_DN39652_c0_g1_i1	1.66744	0	6.03548	0	1.88474	7.78956	7.86335	97.806	21.8328	56.8432	XP_001623698.1	Predicted Protein
Trinity_DN39477_c0_g1_i1	1.66744	0	4.02365	1.8642	0	12.9826	12.7779	106.311	15.0101	69.1035	AIJ02081.1	Amylase
Trinity_DN39469_c0_g1_i1	293.469	551.037	337.987	645.947	497.573	231.739	240.815	206.668	140.549	120.374	XP_008478290.1	Eukaryotic Translation Initiation Factor 4 Gamma 2
Trinity_DN39439_c0_g1_i1	20.843	58.4049	116.686	16.7778	30.1559	12.3335	19.6584	3.40195	2.7291	4.45829	EFX73018.1	Hypothetical Protein Dappudraft_110228
Trinity_DN39427_c0_g1_i2	0	2.53934	0	0	0	9.08782	24.573	208.369	2.7291	115.916	XP_008214976.1	Predicted: Uncharacterized Protein Loc100680479
Trinity_DN39329_c0_g1_i1	0	0	0	0	0	6.4913	32.4363	105.46	5.4582	25.6352	EKC25506.1	Vitelline Membrane Outer Layer Protein 1
Trinity_DN39321_c0_g1_i1	0	0	0	0	0	12.9826	15.7267	94.4041	8.1873	73.5618	ACK44247.1	Vitelline Membrane Outer Layer 1-Like Protein
Trinity_DN39274_c0_g1_i1	3.33488	0	0	1.8642	1.88474	3.89478	5.89751	91.0021	0	69.1035		_
Trinity_DN39201_c0_g1_i1	0	0	0	1.8642	0	20.123	114.019	904.068	19.1037	269.727	XP_012216518.1	Predicted: Uncharacterized Protein Loc105668636
Trinity_DN39139_c0_g1_i1	0	0	0	0	1.88474	15.5791	53.0776	390.374	5.4582	176.102		_
Trinity_DN39127_c0_g1_i2	332.654	327.575	339.999	800.676	573.905	81.7904	74.7018	67.1885	141.913	211.769		_
Trinity_DN39096_c0_g1_i1	982.956	1533.76	2092.3	484.693	98.0067	246.02	245.73	149.686	261.994	164.957		_
Trinity_DN39078_c0_g1_i1	5.00232	2.53934	14.0828	5.59261	1.88474	81.7904	115.001	49.3283	62.7693	94.7387	XP_011431243.1	Predicted: Alpha-Mannosidase 2C1-Like Isoform X1
Trinity_DN39065_c0_g1_i1	358.499	449.464	342.01	501.471	353.39	1354.09	776.506	787.551	867.854	743.42		_
Trinity_DN39062_c0_g1_i1	0	0	6.03548	0	0	3.89478	5.89751	58.6836	2.7291	42.3538	AFJ59945.1	C-Type Lectin 1
Trinity_DN39023_c0_g1_i1	263.455	60.9442	18.1064	726.108	1.88474	22.0704	19.6584	11.0563	2.7291	11.1457	AIN44010.1	Hemolin-Like Protein
Trinity_DN39016_c0_g1_i1	10.0046	2.53934	5.02956	7.45682	16.0203	25.3161	16.7096	68.039	27.291	50.1558	ACU57197.1	Triacylglycerol Lipase
Trinity_DN38998_c0_g1_i1	178.416	177.754	252.484	143.544	110.258	873.729	339.107	201.565	1503.73	218.456	XP_001748625.1	Hypothetical Protein
Trinity_DN38778_c0_g1_i1	0	0	0	0	0	6.4913	3.93167	100.358	2.7291	49.0412	BAR98202.1	Malate Synthase
Trinity_DN38536_c0_g1_i1	6.66976	20.3147	12.071	3.72841	11.3085	21.4213	19.6584	996.771	47.7593	177.217	XP_014020567.1	Arylsulfatase D-Like Isoform X1
Trinity_DN38520_c0_g1_i2	3.33488	5.07869	0	101.599	71.6203	0	0	0	0	0	XP_004519100.1	Patatin-Like Phospholipase Domain-Containing Protein 3
Trinity_DN38502_c0_g1_i1	0	0	0	0	0	3.89478	9.82919	71.4409	0	49.0412	XP_002423671.1	Leucine-Rich Transmembrane Protein, Putative
Trinity_DN38497_c0_g1_i3	230.94	185.372	379.229	486.557	220.515	1179.47	1290.57	2822.77	6248.28	406.819	EFX73213.1	Hypothetical Protein Dappudraft_58148
Trinity_DN38474_c0_g1_i1	621.955	1029.7	963.665	645.947	649.295	1827.3	1672.93	1051.2	1787.56	1814.52	AEI88083.1	Peroxisomal Delta3 Delta2-Enoyl-Coenzyme-Like Protein
Trinity_DN38446_c0_g1_i1	0	2.53934	2.01183	0	1.88474	16.8774	9.82919	137.779	13.6455	104.77	CTRB1	Chymotrypsin Bi
Trinity_DN3822_c0_g1_i1	431.867	327.575	412.424	201.334	260.095	966.555	640.863	732.27	1561.05	455.86		_
Trinity_DN38209_c0_g1_i2	1.66744	3.80901	2.01183	1.8642	3.76949	5.19304	1.96584	121.62	16.3746	15.604	AFN66645.1	C-Type Lectin-Like Protein
Trinity_DN38178_c0_g1_i1	36.6837	35.5508	108.639	128.63	69.7356	175.265	67.8214	80.7963	1711.15	396.788		_
Trinity_DN38160_c0_g2_i1	1.66744	0	2.01183	0	0	59.72	0	25.5146	62.7693	17.8332	XP_003439241.1	Predicted: Nk-Tumor Recognition Protein Isoform X1
Trinity_DN38074_c0_g1_i1	0	8.8877	6.03548	9.32102	1.88474	15.5791	13.7609	53.5807	38.2074	66.8744	CDQ83817.1	Unnamed Protein Product
Trinity_DN38060_c0_g1_i1	0	2.53934	0	0	0	31.1583	80.5993	372.513	35.4783	317.653	AEB96259.1	C-Type Lectin
Trinity_DN37944_c4_g2_i1	1676.61	1790.24	1031.06	1249.95	1119.54	2478.38	3068.67	2656.92	5912.6	2176.76		_
Trinity_DN37938_c0_g1_i1	247.615	143.473	368.164	804.404	273.288	46.7374	75.6847	95.2546	30.0201	70.2181	KOF68482.1	Hypothetical Protein Ocbim_22007232Mg
Trinity_DN37937_c1_g1_i1	253.451	93.9557	187.1	1091.49	532.44	216.809	52.0947	49.3283	16.3746	34.5518		_
Trinity_DN37903_c0_g1_i3	3.33488	0	2.01183	1.8642	3.76949	29.2109	17.6925	101.208	17.7392	158.269		_
Trinity_DN37852_c0_g1_i1	0	0	0	0	0	102.563	168.079	1003.58	49.1238	950.73	ADB66711.1	Trypsin 1A
Trinity_DN37813_c0_g1_i4	253.451	90.1467	348.046	964.726	331.715	37.0004	59.958	147.134	45.0302	112.572	CDQ98495.1	Unnamed Protein Product, Partial
Trinity_DN37763_c0_g1_i1	16.6744	20.3147	20.1183	5.59261	5.65423	27.2635	64.8726	73.1419	16.3746	86.9367		_
Trinity_DN37720_c0_g1_i1	0	0	0	0	0	19.4739	48.163	71.4409	13.6455	71.3326	XP_007518038.1	Predicted: Mucin-3B-Like
Trinity_DN37716_c0_g1_i1	56.6929	33.0115	84.4967	33.5557	9.42372	364.811	255.559	44.2253	338.409	98.0824	XP_011747761.1	Predicted: Probable Serine/Threonine-Protein Kinase Nek3
Trinity_DN37679_c0_g1_i1	1.66744	0	0	5.59261	0	7.78956	25.5559	275.558	10.9164	213.998		_
Trinity_DN37660_c0_g1_i1	170.079	219.653	296.744	83.8892	69.7356	2736.73	290.944	1130.3	5340.85	84.7075		_
Trinity_DN37658_c0_g1_i3	0	0	0	0	1.88474	11.6843	3.93167	129.274	2.7291	49.0412	AHA51293.1	Gata Domain-Containing Protein, Partial
Trinity_DN37616_c0_g1_i1	0	0	2.01183	0	0	35.7022	39.3167	1007.83	9.55185	412.392	XP_003371813.1	Putative Low-Density Lipoprotein Receptor Domain Class A
Trinity_DN37559_c0_g1_i1	0	0	0	0	0	5.19304	7.86335	112.264	10.9164	88.0512	ACK44247.1	Vitelline Membrane Outer Layer 1-Like Protein
Trinity_DN37534_c0_g1_i1	5.83604	10.1574	0	9.32102	9.42372	51.9304	106.155	501.788	8.1873	226.258	EFX79713.1	Hypothetical Protein Dappudraft_304421
Trinity_DN37479_c0_g1_i1	196.758	86.3377	183.076	74.5682	47.1186	249.915	151.369	574.079	322.034	813.638	ABA54612.1	C-Type Lectin 1
Trinity_DN37401_c0_g1_i1	12.5058	33.0115	23.136	142.612	15.078	7.14043	5.89751	10.2058	0	11.1457	KMW68940.1	Hypothetical Protein Bddg_13146
Trinity_DN37375_c0_g1_i2	0	0	0	3.72841	0	5.19304	13.7609	52.7302	0	15.604	EFX89905.1	Hypothetical Protein Dappudraft_299805
Trinity_DN37192_c0_g1_i1	1.66744	0	6.03548	0	5.65423	33.7548	55.0434	517.096	10.9164	288.674	ADG85663.1	Lectin A Isoform 4
Trinity_DN37157_c0_g1_i1	132.561	22.8541	291.715	42.8767	9.42372	6.4913	31.4534	8.50487	10.9164	2.22915		_
Trinity_DN37085_c0_g1_i1	28.3465	15.2361	24.1419	48.4693	28.2712	38.9478	28.5046	364.859	32.7492	255.237	AKA64754.1	C-Type Lectin 4
Trinity_DN37067_c0_g1_i1	311.811	332.654	206.212	28.8952	56.5423	1855.86	4732.75	362.308	2562.63	4956.5		_
Trinity_DN37036_c0_g1_i2	681.983	1113.5	919.404	506.132	606.888	3407.93	1051.72	1811.54	3741.6	958.532		_
Trinity_DN36997_c0_g1_i1	33.3488	45.7082	58.343	48.4693	16.9627	167.476	60.9409	169.247	354.783	52.3849		_
Trinity_DN36966_c0_g1_i1	722.835	1218.88	617.631	1797.09	1092.21	7159.26	719.496	3538.03	8658.07	3329.23		_
Trinity_DN36897_c0_g1_i1	73.3673	11.427	20.1183	5.59261	1.88474	25.9652	100.258	478.824	62.7693	308.737	KRY96916.1	Hypothetical Protein T11_4388
Trinity_DN36839_c0_g1_i1	6.66976	5.07869	4.02365	3.72841	5.65423	18.1756	29.4876	182.855	5.4582	169.415	XP_006668303.1	Peptidase A1
Trinity_DN36805_c0_g1_i1	4.1686	30.4721	0	50.3335	15.078	101.913	181.84	172.649	241.525	25.6352		_
Trinity_DN36794_c1_g1_i1	3.33488	1.26967	4.02365	4.66051	0	3.89478	32.4363	102.058	0	63.5306		_
Trinity_DN36612_c0_g1_i1	324.317	45.7082	943.546	87.6176	51.8305	5.19304	14.7438	31.468	2.7291	0	AGV07535.1	Heat Shock Protein 70 Form 2, Partial
Trinity_DN36567_c0_g1_i1	0	0	0	0	1.88474	12.9826	3.93167	85.0487	5.4582	56.8432	AEX59149.1	Ecdysteroid Regulated-Like Protein
Trinity_DN36525_c0_g1_i1	8.3372	31.7418	26.1537	27.031	60.3118	118.791	159.233	1052.05	69.5921	820.325	ACV97157.1	Collagenolytic Serine Protease
Trinity_DN36484_c0_g1_i1	373.506	248.856	296.744	260.057	361.871	109.054	142.523	112.264	118.716	117.03	KDR17869.1	Catenin Delta-2
Trinity_DN36458_c0_g1_i1	161.742	191.72	74.4376	156.593	168.685	1111.31	263.422	352.102	2341.57	434.683		_
Trinity_DN36403_c0_g1_i1	5.83604	233.62	48.2838	40.0804	37.6949	213.564	96.326	348.7	780.523	742.305		_
Trinity_DN36315_c0_g1_i1	25.0116	45.7082	30.1774	39.1483	51.8305	105.808	72.736	83.3478	150.101	74.6764	AAL49373.2	Rh59211P
Trinity_DN36174_c0_g1_i1	0	2.53934	6.03548	0	0	2.59652	25.5559	168.396	5.4582	80.2492	ADW08726.1	C-Type Lectin-1
Trinity_DN36005_c0_g1_i1	0	0	0	0	0	7.78956	21.6242	130.975	2.7291	57.9578	XP_008434341.1	Predicted: Mucin-2-Like, Partial
Trinity_DN35944_c0_g1_i1	8.3372	12.6967	2.01183	17.7099	33.9254	53.8778	40.2997	145.433	442.114	89.1658	ENN72237.1	Hypothetical Protein Yqe_11100, Partial
Trinity_DN35918_c0_g1_i1	0	2.53934	0	0	0	12.9826	62.9068	441.403	24.5619	113.686	XP_005180903.2	Predicted: Apolipoprotein D-Like
Trinity_DN35902_c0_g1_i1	65.8639	121.888	81.4789	57.7904	60.3118	29.2109	22.6071	27.2156	21.8328	37.8955	CAB85964.1	Phosphoenolpyruvate Carboxykinase
Trinity_DN35841_c0_g1_i1	0	2.53934	4.02365	1.8642	1.88474	5.19304	27.5217	6.8039	110.529	7.80201		_
Trinity_DN35748_c0_g1_i2	73.3673	209.496	148.875	72.704	159.261	52.5795	57.0093	39.1224	51.8529	49.0412		_
Trinity_DN35615_c0_g1_i3	16.6744	5.07869	4.02365	108.124	1.88474	1.94739	1.96584	0	0	0	XP_001951627.2	Uncharacterized Protein Loc100166829
Trinity_DN35533_c0_g1_i1	99.2126	182.833	97.5736	326.236	149.837	1040.56	324.363	460.114	971.56	423.538	AAP13578.1	Lysozyme
Trinity_DN35451_c0_g1_i1	0.83372	31.7418	11.065	13.0494	11.3085	11.6843	21.6242	56.1322	178.756	181.675		_
Trinity_DN35434_c0_g2_i1	0	2.53934	0	1.8642	3.76949	50.6322	115.984	856.441	10.9164	352.205	ABD65301.1	Zinc Proteinase Mpc1
Trinity_DN35377_c0_g1_i1	0	0	0	3.72841	0	7.78956	30.4705	98.6565	27.291	84.7075		_
Trinity_DN35164_c0_g1_i1	0	0	0	0	0	19.4739	27.5217	148.835	13.6455	137.092	AEO92001.1	C-Type Lectin 1
Trinity_DN35081_c0_g1_i1	0	0	0	0	0	1.29826	7.86335	30.6175	0	24.5206	AEX59149.1	Ecdysteroid Regulated-Like Protein
Trinity_DN35025_c1_g1_i3	2250.21	3414.15	1558.16	2644.37	2041.18	5228.09	6408.63	5786.72	6431.13	6762.11	ENN72863.1	Hypothetical Protein Yqe_10512, Partial
Trinity_DN34921_c0_g1_i1	0	2.53934	2.01183	1.8642	1.88474	9.73695	7.86335	10.2058	40.9365	11.1457		_
Trinity_DN34768_c0_g1_i1	152.571	845.601	41.2424	876.176	32.983	94.1239	18.6755	81.6468	15.0101	56.8432	ABW87872.1	Serine Protease
Trinity_DN34430_c0_g1_i1	3.33488	0	8.0473	35.4199	18.8474	0	0	0	0	0	XP_005147017.1	Histidine-Rich Glycoprotein
Trinity_DN34375_c0_g1_i1	0	0	0	0	1.88474	37.6496	31.4534	298.521	21.8328	226.258		_
Trinity_DN34249_c0_g1_i1	0	0	0	0	0	24.6669	58.9751	221.127	5.4582	191.706	AGI92548.1	C-Type Lectin
Trinity_DN34119_c0_g1_i1	0	17.7754	38.2247	20.5063	1.88474	0	1.96584	0	0	0		_
Trinity_DN34073_c1_g1_i1	2197.69	1719.14	415.442	669.25	780.284	4725.67	2557.55	2434.95	5853.92	4468.32		_
Trinity_DN33883_c0_g1_i1	31.6814	50.7869	13.0769	35.4199	24.5017	5.19304	9.82919	8.50487	2.7291	6.68744	XP_014231767.1	Atp-Dependent Helicase Brm-Like
Trinity_DN33583_c0_g1_i1	225.938	206.956	498.933	625.441	483.437	838.027	343.039	339.344	10045.8	1627.28		_
Trinity_DN33420_c0_g1_i1	0	0	0	0	0	7.78956	15.7267	73.9924	0	33.4372	KRY96916.1	Hypothetical Protein T11_4388
Trinity_DN33347_c0_g1_i1	0	2.53934	0	0	0	29.86	70.7701	741.625	5.4582	460.318	CAB43519.1	Zinc Proteinase
Trinity_DN33333_c0_g1_i1	2182.68	4095.96	820.825	1051.41	1138.39	6634.11	7656.94	8213.16	3354.07	4501.76		_
Trinity_DN33265_c0_g1_i1	13.3395	1.26967	3.01774	61.5188	32.0407	2.59652	1.96584	2.55146	0	2.22915		_
Trinity_DN33105_c0_g1_i1	19.1756	15.2361	11.065	14.9136	16.9627	66.2113	31.4534	41.6739	55.9466	25.6352	XP_004530208.1	Predicted: Atp Synthase-Coupling Factor 6, Mitochondrial
Trinity_DN33050_c0_g1_i1	0	2.53934	0	0	0	48.6848	29.4876	867.497	2.7291	337.715	ABI97373.1	C-Type Lectin
Trinity_DN32918_c0_g1_i1	0	2.53934	0	0	1.88474	0	9.82919	44.2253	5.4582	40.1246	XP_006825780.1	Predicted: Uncharacterized Protein Loc102808491
Trinity_DN32887_c0_g1_i1	3.33488	7.61803	4.02365	3.72841	3.76949	40.2461	17.6925	308.727	91.4249	160.498	ACJ23247.1	Gamma-Interferon-Inducible Lysosomal Thiol Reductase
Trinity_DN32867_c0_g1_i1	2220.2	4695.24	1134.67	1303.08	1479.52	9574.02	9739.74	10610.7	4456.62	5980.8		_
Trinity_DN32839_c0_g1_i2	0	5.07869	2.01183	0	0	7.78956	3.93167	35.7205	8.1873	40.1246	ABI97372.1	C-Type Lectin
Trinity_DN32741_c0_g1_i1	185.92	264.092	231.36	193.877	299.674	532.287	396.116	577.481	513.071	473.693	XP_014676379.1	Predicted: 28S Ribosomal Protein S23, Mitochondrial-Like Isoform X1
Trinity_DN32691_c1_g1_i1	3925.99	10154.8	4128.27	6279.57	5595.81	30753.8	5914.22	25113.2	36527.7	7079.77		_
Trinity_DN32512_c0_g1_i1	15.007	6.34836	10.0591	10.2531	16.0203	31.8074	56.0264	383.57	36.8429	242.977	AGG23537.1	C-Type Lectin Lecd
Trinity_DN32245_c0_g1_i1	3.33488	10.1574	16.0946	44.7409	32.983	62.3165	137.609	348.7	114.622	133.749		_
Trinity_DN32003_c0_g1_i1	9.17092	31.7418	15.0887	9.32102	5.65423	112.949	160.216	1506.21	99.6122	966.334	ACZ63471.1	I-Type Lysozyme-Like Protein 1
Trinity_DN31755_c0_g1_i1	1.66744	0	0	0	0	69.4569	158.25	1036.74	27.291	774.628	XP_007974085.1	Predicted: Chondroadherin-Like Protein Isoform X1
Trinity_DN31119_c0_g1_i1	1096.34	1358.55	1083.37	919.985	697.356	541.375	448.211	464.366	394.355	578.463		_
Trinity_DN30924_c0_g1_i1	0	0	0	0	0	38.2987	64.8726	563.873	24.5619	172.759	AGS42196.1	C-Type Lectin 5
Trinity_DN30878_c0_g1_i1	3.33488	0	10.0591	1.8642	0	7.78956	302.739	6.8039	188.308	6.68744	AAM62944.1	40S Ribosomal Protein S2
Trinity_DN30626_c0_g1_i1	56.6929	92.686	54.3193	68.0435	58.4271	138.914	123.848	125.872	207.412	127.061	AIU99750.1	Mitochondrial Cytochrome C Oxidase Subunit Vic
Trinity_DN30310_c0_g1_i1	5.00232	7.61803	10.0591	269.378	234.651	7.78956	10.8121	6.8039	5.4582	6.68744	XP_013380527.1	60S Ribosomal Protein L15-Like
Trinity_DN29994_c0_g1_i1	23.3442	40.6295	26.1537	109.988	8.48135	181.756	535.691	27.2156	302.93	271.956	EFX62881.1	Hypothetical Protein Dappudraft_336270
Trinity_DN29758_c0_g1_i1	80.0371	27.9328	14.0828	9.32102	30.1559	175.914	21.6242	147.134	706.837	131.52	ADN43412.1	Hemocyte Homeostasis-Associated Protein
Trinity_DN29487_c0_g1_i1	28.3465	33.0115	39.2306	62.4509	26.3864	0	0	6.8039	8.1873	6.68744	EFX83073.1	Hypothetical Protein Dappudraft_101007
Trinity_DN29303_c0_g1_i1	0	0	0	0	1.88474	10.3861	15.7267	353.803	5.4582	160.498		_
Trinity_DN29052_c0_g1_i1	58.3604	73.6409	69.408	68.9756	87.6406	182.406	127.779	119.068	170.569	141.551	ABW23194.1	Ribosomal Protein Rpl39
Trinity_DN29000_c0_g1_i1	25.0116	22.8541	20.1183	39.1483	37.6949	96.0713	66.8385	73.1419	122.81	49.0412	XP_011554368.1	Predicted: Cytochrome B-C1 Complex Subunit 8
Trinity_DN28958_c0_g1_i1	175.081	187.911	132.781	449.273	203.552	1376.81	379.407	576.63	1618.36	780.201	AAP13577.2	Lysozyme
Trinity_DN28929_c0_g1_i1	134.229	180.293	107.633	84.8213	176.224	380.39	408.894	317.232	697.285	305.393		_
Trinity_DN28800_c0_g1_i1	110.885	228.541	57.337	587.225	33.9254	78.5448	45.2143	11.9068	40.9365	20.0623		_
Trinity_DN28791_c0_g1_i1	66.6976	0	123.727	24.2347	3.76949	1.29826	7.86335	3.40195	0	2.22915		_
Trinity_DN28675_c0_g1_i2	0	0	2.01183	0	3.76949	6.4913	3.93167	21.2622	5.4582	50.1558	EIQ01364.1	Polysaccharide Lyase Family 8,Polysaccharide Lyase Family 8
Trinity_DN28353_c0_g1_i1	1.66744	0	0	0	0	11.6843	93.3773	949.994	2.7291	160.498		_
Trinity_DN28295_c0_g1_i2	65.0301	66.0229	432.543	3065.68	115.912	33.7548	44.2313	98.6565	54.582	33.4372	XP_001945726.2	Hormone Receptor 4 Isoform X1
Trinity_DN28113_c0_g1_i1	38.3511	33.0115	126.745	101.599	107.43	245.371	671.333	62.0856	3375.9	86.9367		_
Trinity_DN28065_c0_g1_i1	106.716	57.1352	75.4435	84.8213	64.0813	12.3335	18.6755	35.7205	27.291	45.6975		_
Trinity_DN27706_c0_g1_i1	6.66976	15.2361	76.4494	7.45682	0	184.353	139.574	3323.7	519.894	550.599	ACU82845.1	Fatty Acids Binding Protein
Trinity_DN2764_c0_g1_i1	0	0	2.01183	0	0.942372	50.6322	128.762	773.943	25.9265	541.682	AKC91366.1	Chymotrypsin, Partial
Trinity_DN27525_c0_g1_i1	1.66744	2.53934	2.01183	0	0	34.4039	51.1118	602.996	38.2074	371.153	AGS42196.1	C-Type Lectin 5
Trinity_DN26275_c0_g1_i1	10.0046	12.6967	10.0591	9.32102	7.53898	62.3165	15.7267	46.7768	76.4148	15.604		_
Trinity_DN26233_c0_g1_i1	1.66744	5.07869	8.0473	1.8642	3.76949	22.7196	39.3167	4.25244	94.154	2.22915		_
Trinity_DN2608_c0_g1_i1	6.66976	35.5508	4.02365	126.766	102.719	2.59652	4.91459	6.8039	17.7392	5.57286	P21997.1	Ssgp_Volca Recname: Full=Sulfated Surface Glycoprotein 185; Short=Ssg 185; Flags: Precursor
Trinity_DN25448_c0_g1_i1	71.6999	111.731	44.2602	89.4818	90.4677	299.898	257.525	183.705	251.077	111.457	AEB54627.1	Trap
Trinity_DN25299_c0_g1_i1	19.1756	10.1574	13.0769	8.38892	6.59661	35.053	21.6242	49.3283	87.3312	22.2915	ADV04044.1	Atp-Binding Cassette Transmembrane Transporter
Trinity_DN25055_c0_g1_i1	10.0046	13.9664	22.1301	5.59261	11.3085	18.8248	21.6242	228.781	626.329	17.8332		_
Trinity_DN25018_c0_g1_i1	58.3604	68.5623	60.3548	65.2472	62.1966	18.1756	11.795	27.2156	32.7492	22.2915	KDR11189.1	E3 Ubiquitin-Protein Ligase March8
Trinity_DN24556_c0_g1_i1	206.762	292.024	175.029	279.631	295.905	899.694	699.838	474.572	723.212	468.12	AEB54627.1	Trap
Trinity_DN24413_c1_g1_i1	517.74	408.834	307.809	297.341	373.179	1443.67	340.09	728.868	3183.5	934.012		_
Trinity_DN24207_c0_g1_i1	1.66744	2.53934	1.00591	4.66051	1.88474	1.29826	123.848	0	62.7693	2.22915		_
Trinity_DN23682_c0_g1_i1	1533.21	2148.28	1338.87	1477.38	1837.63	3549.44	3233.8	3109.38	5016.09	2342.83	AFY10818.1	Mitochondrial Cytochrome C Oxidase Subunit Iv
Trinity_DN23438_c0_g1_i1	307.643	340.272	280.65	259.124	277.057	1054.19	505.22	364.009	3225.8	1184.79		_
Trinity_DN22650_c0_g1_i1	0	0	0	0	1.88474	19.4739	56.0264	283.212	16.3746	306.507	ALF45199.1	Ctldcp3
Trinity_DN22466_c0_g2_i1	0	0	5.02956	0	0	70.1061	142.523	990.818	111.893	1421.08	EFX90166.1	Hypothetical Protein Dappudraft_299971
Trinity_DN22182_c0_g1_i1	7.50348	2.53934	29.1715	27.031	11.3085	85.6852	63.8897	110.563	332.95	20.0623	EFX73213.1	Hypothetical Protein Dappudraft_58148
Trinity_DN22018_c0_g1_i1	46.6883	96.495	50.2956	54.994	45.2339	13.6317	31.4534	19.5612	13.6455	20.0623		_
Trinity_DN21449_c0_g1_i1	6.66976	10.1574	16.0946	121.173	111.2	6.4913	7.86335	13.6078	4.09365	6.68744		_
Trinity_DN20887_c0_g1_i1	97.5452	74.9106	80.473	73.6361	35.8101	279.126	154.318	105.46	397.084	351.09		_
Trinity_DN2020_c0_g1_i1	3.33488	153.63	65.3843	8.38892	17.9051	5.19304	8.84627	5.95341	8.1873	5.57286	EPF41504.1	Transcriptional Regulator, Partial
Trinity_DN20131_c0_g1_i1	0	5.07869	4.02365	0	3.76949	210.967	368.594	2610.15	156.923	2562.4	ABD65300.1	Carboxypeptidase B
Trinity_DN20064_c0_g1_i1	15158.7	10002.5	11781.3	12889.1	10230.4	3473.5	3629.92	2545.51	554.008	3468.55	CEP24827.1	Putative Cell Agglutination Protein C1289.15 Flags: Precursor, Partial
Trinity_DN19846_c0_g1_i1	74.2011	81.259	14.0828	13.0494	30.1559	31.8074	852.19	21.2622	911.52	62.4161		_
Trinity_DN19634_c0_g1_i1	671.144	711.016	249.466	137.951	172.454	201.879	39.3167	81.6468	81.873	104.77	CAB85964.1	Phosphoenolpyruvate Carboxykinase
Trinity_DN19180_c0_g1_i1	35.0162	38.0901	19.1123	33.5557	45.2339	11.6843	9.82919	10.2058	2.7291	4.45829		_
Trinity_DN17900_c0_g1_i1	1.66744	2.53934	0	1.8642	0	3.89478	23.59	199.014	13.6455	160.498	AHY86471.1	Hemocyanin Subunit L1, Partial
Trinity_DN17332_c0_g1_i1	20.0093	34.2811	24.1419	7.45682	7.53898	24.6669	23.59	192.21	106.435	423.538		_
Trinity_DN14121_c0_g1_i1	100.88	171.406	80.473	106.26	132.875	57.1235	58.9751	54.4312	27.291	37.8955	XP_013779485.1	Myosin Heavy Chain, Non-Muscle-Like
Trinity_DN13770_c0_g1_i1	471.052	436.767	520.057	463.255	466.474	1127.54	708.684	941.489	1108.02	1054.39		_
Trinity_DN13065_c0_g1_i1	1260.58	482.475	334.969	1293.76	876.406	3146.33	31188	1591.26	222633	99321.8		_
Trinity_DN12145_c0_g1_i1	129.227	50.7869	335.975	50.3335	7.53898	10.3861	15.7267	13.6078	5.4582	2.22915		_
Trinity_DN11239_c0_g1_i1	255.952	285.676	160.946	316.915	327.946	639.393	466.886	591.089	873.312	532.766	EMC82806.1	Dna Topoisomerase 1
Trinity_DN11051_c0_g1_i1	20.0093	5.07869	3.01774	66.1793	38.6373	1.29826	3.93167	1.70097	2.7291	5.57286		_
Trinity_DN10938_c0_g1_i1	170.913	264.092	124.733	223.705	137.586	612.779	494.408	930.433	833.74	173.873	WP_015477851.1	Outer Membrane Autotransporter
Trinity_DN10396_c0_g1_i1	65.0301	22.8541	14.0828	42.8767	66.9084	77.8956	125.814	119.068	176.027	180.561		_

## Sheet: 90Metabolites
Supplementary Table. Metabolic profiles comparing between Top- (T) and Bottom- (B) weight groups of 5-month-old P.monodon (n=15/group). 90 metabolites selected from variable importance in projection (VIP>1) were acquired by negative and positive ESI mode.
Primary ID	ESI mode	T1	T2	T3	T4	T5	T6	T7	T8	T9	T10	T11	T12	T13	T14	T15	B1	B2	B3	B4	B5	B6	B7	B8	B9	B10	B11	B12	B13	B14	B15
19.39_304.24051Arachidonic acid	Negative	0.364047	1.80971	-0.305158	-0.660172	0.069346	-0.30693	-0.612605	0.053052	1.40217	-0.354572	1.07586	-0.080994	2.97094	0.135571	0.937956	-0.86175	-0.208322	0.205158	0.202025	-1.18697	-0.838816	-0.080456	-0.500588	-1.71474	-0.965474	1.72856	-0.920356	-0.370104	-0.628288	-0.358102
18.585_302.22486cis-5,8,11,14,17-Eicosapentaenoic acid	Negative	-0.517732	0.845169	-0.739752	-0.998458	-0.93918	-0.311618	-0.649475	-0.308448	0.158343	-0.72265	1.67123	-0.542292	2.27927	-0.396198	0.691663	-1.28859	-0.267645	0.462034	1.18739	-0.640129	-0.304206	0.729168	0.491057	-1.60589	-0.535962	2.68486	-0.827648	0.10227	0.33216	-0.038757
1.058_219.11072Pantothenic acid	Negative	-0.061764	0.957959	0.83431	-0.186867	-0.048992	-0.570868	1.0633	-0.002028	0.307703	-0.498745	-0.036407	0.697639	2.69148	0.22351	0.380301	-0.935782	-0.605306	-1.3963	0.792045	-0.956092	0.036076	-1.27441	0.236284	-1.62947	2.30418	0.596352	-1.18493	-1.14255	-0.287499	-0.303124
5.325_219.11073Pantothenic acid	Negative	-0.651123	0.109624	0.312549	-0.345958	0.145119	0.084001	0.657306	0.237921	1.65853	-0.831816	-0.111284	0.868004	2.61373	-0.063672	1.00361	-0.852487	-0.244878	-1.28024	0.799952	-0.883242	-0.043238	-1.22422	-0.014913	-1.59027	2.0751	0.599941	-1.26492	-1.21911	-0.234433	-0.30959
6.887_132.07842-Butoxyacetic acid	Negative	1.01193	-0.371959	-1.00918	0.083323	-0.431442	1.63922	-0.745997	-0.486955	3.88005	-0.415422	-0.321968	-0.241956	-0.62212	0.773868	0.589576	-0.588013	-0.28102	-0.768725	1.82992	-0.613275	-0.058938	-0.108312	0.208231	-0.216285	-0.471332	-0.714758	-0.602471	-0.215694	-0.075818	-0.654485
7.033_132.07842-Butoxyacetic acid	Negative	-0.127249	-0.291858	-0.85668	-0.19358	-0.661774	1.10089	-0.821194	-0.592462	4.1757	-0.574939	-0.109414	-0.304049	-0.758672	1.6459	0.791343	-0.568367	0.69837	-0.498728	1.00402	0.305685	-0.15511	-0.111901	-0.299496	-0.261215	-0.188594	-0.556668	-0.714929	-0.157245	-0.53543	-0.382364
7.577_166.06283L-(-)-3-Phenyllactic acid	Negative	-0.428015	1.06318	-0.66598	-0.388411	-0.734491	1.66297	-0.797691	0.757833	3.8044	-0.757537	0.052311	0.525398	-0.708826	0.680027	0.984574	-0.664722	-0.724055	-0.320448	1.31863	-0.70878	-0.123467	-0.233386	-0.23945	-0.430181	-0.256554	-0.683762	-0.731967	-0.567226	-0.527918	-0.15646
5.495_182.05783DL-4-Hydroxyphenyllactic acid	Negative	-0.010797	0.021759	-1.22129	0.082393	-0.608908	1.48439	-1.08675	-0.080147	3.51995	-1.09826	-0.814628	0.10445	-0.731742	1.47356	0.732924	0.103362	-0.890504	-0.618729	1.10974	0.800225	-0.145863	-0.637764	-0.230797	-0.751271	0.366912	0.565397	-1.20076	0.095251	-0.449137	0.117041
1.085_148.03693D-a-Hydroxyglutaric acid	Negative	0.588595	-0.399689	-1.17831	0.83076	0.059977	0.329199	-1.15453	0.799767	1.86819	-0.81606	-1.08325	3.29971	-0.799857	0.123914	-0.209165	-0.004338	-0.777598	-0.921039	-0.727869	-0.479749	0.50374	-0.508098	0.747698	-1.10454	-0.071596	0.494605	-1.17743	0.92988	0.246564	0.590517
1.463_148.03693D-a-Hydroxyglutaric acid	Negative	-0.721336	-0.430039	-1.04033	0.925549	0.159504	1.43471	-0.95914	1.16238	2.10534	-0.877074	-1.02356	2.337	-0.77558	1.9756	0.925492	0.069485	-0.730102	-0.776709	-0.837506	-0.252877	-0.266127	-0.569923	-0.006835	-1.00231	-0.402651	0.47542	-1.02954	0.102415	-0.271186	0.299938
1.222_148.03694d-Ribono-1,4-lactone	Negative	-0.060594	-0.313878	-0.808745	0.950539	0.528327	1.41908	-0.737073	0.28051	3.93282	-0.774975	-0.739938	1.52091	-0.644325	1.02485	0.549175	-0.054499	-0.6152	-0.682786	-0.691337	-0.323464	-0.377673	-0.55851	-0.435328	-0.797046	-0.438676	-0.004368	-0.801788	-0.167134	-0.355009	0.176129
0.83_182.07892D-(-)-Mannitol	Negative	2.53478	-0.034404	0.621465	0.597335	1.16613	0.402685	0.161774	0.578778	2.03134	0.663757	-0.079627	-0.234184	-0.056665	-0.016443	1.14535	-0.638661	-0.48318	-0.155473	-1.68917	0.152427	-0.458384	0.051315	-0.094447	-2.70517	-0.312305	-0.160289	-1.36681	-0.604131	-0.663934	-0.353866
8.745_304.14592MFCD00021794	Negative	3.48768	0.073515	-0.99827	0.648316	0.138432	-0.45909	0.337675	-0.177941	2.26067	-1.20864	1.09107	0.835898	0.175944	0.025425	1.01778	-0.720063	-0.090372	-0.304534	-0.95023	-0.843905	-0.469959	-0.613239	-0.618667	-1.20898	-0.457009	0.077399	-0.11895	0.062059	-0.262116	-0.729895
1.013_134.02131D-(+)-Malic acid	Negative	-0.080894	0.475824	-0.825215	-0.304262	-0.133238	-0.246063	-0.355937	1.2387	1.07001	0.992155	-0.740291	1.37405	0.044614	2.95451	2.78897	-0.468555	-0.574719	-0.722163	-0.657832	-0.485946	-0.238405	-0.71352	-0.24846	-0.924376	-0.42423	-0.272716	-0.86085	-0.639876	-0.634186	-0.387103
27.064_142.02398Ethyl trifluoroacetate	Negative	0.21089	0.960205	0.759675	0.644462	0.202555	-0.696171	-0.943482	1.64529	1.9038	2.04529	0.076879	1.41655	0.694766	1.07776	0.137168	-0.654503	-0.353371	0.673835	-0.38981	-0.124	-1.01775	-1.04273	-0.756202	-0.942436	-0.821996	-0.403904	-0.640894	-1.49308	-0.433818	-1.73498
8.756_145.052544-Indolecarbaldehyde	Negative	0.249957	-1.13693	-0.184167	-0.366591	-0.613815	0.150395	-0.829025	0.783145	3.02945	1.56237	1.578	0.73784	0.327726	1.52743	0.490185	-0.390929	0.671882	-1.04422	-0.963771	-1.15584	0.240965	-0.133097	0.164495	-0.036094	-0.374513	-1.0496	-0.719292	-0.506583	-0.58964	-1.41973
9.046_175.06323Indole-3-acetic acid	Negative	-0.380322	0.319642	-0.117704	-0.569194	-0.492808	0.709245	-0.139369	0.902126	3.91035	0.435542	0.918193	2.44323	-0.093548	-0.263164	0.242202	-0.652919	-0.194897	-0.624694	-0.377992	-0.725472	-0.34536	-0.42764	-0.580525	-0.453188	-0.38863	-0.54814	-0.647798	-0.540196	-0.594462	-0.722501
13_144.11481Caprylic acid	Negative	0.60442	-1.12075	-0.041257	0.26559	1.00926	0.712365	2.09528	0.605955	2.24492	1.68491	0.309621	1.278	-0.510481	1.63652	-0.409005	-0.705572	-0.930454	-0.974898	-0.503819	-0.640164	-0.114117	-0.959807	-0.739267	-0.232401	-0.773424	-0.987907	-0.414176	-0.482796	-0.967294	-0.939265
14.105_158.13049Nonanoic acid	Negative	0.537565	-0.819324	-0.441944	0.858229	1.20216	0.887063	1.26001	1.25011	2.63789	0.994847	0.530984	1.11869	0.268705	1.12286	0.191875	-0.128436	-0.927066	-0.991322	-0.867238	-0.815855	-0.958659	-0.885257	-0.746524	-0.012474	-0.980496	-1.16443	-0.222853	-0.630972	-1.12576	-1.14238
27.012_239.89909trimetaphosphoric acid	Negative	-0.503269	-0.590389	-0.839516	0.72558	0.37588	0.598495	0.370433	0.318521	2.05421	2.53768	1.62593	1.22491	1.62926	0.784113	0.143773	-0.675818	-0.494595	-0.581354	-0.138704	-0.532952	-0.54834	-0.569793	-0.738305	-1.37005	-0.914801	-0.74898	-0.948604	-0.899144	-0.620314	-0.673864
21.498_384.19725Bortezomib	Negative	-0.296379	-0.088027	-1.08388	-1.40702	-1.41133	-1.2445	-0.979697	-0.019662	0.056083	-1.49142	-0.359319	0.233231	0.029494	-0.145441	-0.27574	0.642338	0.246223	0.107334	1.09004	-0.343036	0.174489	1.08248	1.01919	2.80194	1.6692	1.60569	-1.0918	-0.53842	-0.065401	0.083346
9.6_254.05815Daidzein	Negative	-0.334623	-0.369559	-0.383012	-0.382115	-0.384808	-0.382901	-0.384794	-0.384353	-0.385157	-0.380094	0.707678	-0.384213	-0.379882	-0.381784	-0.359773	-0.368772	-0.321913	-0.342714	1.53547	-0.324441	0.105633	0.231763	1.32472	-0.25311	-0.364244	4.61116	-0.253794	-0.304742	-0.321507	-0.384121
9.688_254.05814Daidzein	Negative	-0.391463	-0.445618	-0.453457	-0.458421	-0.463994	-0.461344	-0.463474	-0.464922	-0.445961	-0.45671	0.98497	-0.459606	-0.451755	-0.403389	-0.429791	-0.450082	-0.376207	-0.392141	2.79123	-0.399389	0.074326	0.327716	1.10285	0.811436	-0.446095	3.74284	-0.308021	-0.372917	-0.390404	-0.450214
10.784_270.05311Genistein	Negative	-0.548977	-0.373717	-0.520423	-0.551773	-0.584769	-0.567158	-0.593101	-0.594449	-0.550281	-0.569515	1.52833	-0.583119	-0.562558	-0.515811	-0.539741	-0.456824	-0.196352	-0.434539	2.12681	-0.195038	0.568888	0.803239	2.031	0.54063	-0.447933	3.34789	-0.347459	-0.340419	-0.318029	-0.554804
11.586_330.24089(15Z)-9,12,13-Trihydroxy-15-octadecenoic acid	Negative	-0.76297	-0.808911	-0.83361	-0.654847	-0.862323	-0.748766	-0.809186	-0.864848	-0.391019	-0.914307	0.020432	-0.663312	-0.496596	-0.610104	-0.635904	0.026346	0.619045	0.279828	1.95767	0.126455	0.531191	2.11595	1.31608	-0.085974	0.040163	3.24702	0.047518	-0.08068	0.184261	-0.28861
18.678_278.22484a-Eleostearic acid	Negative	-0.160428	-0.625869	-0.901244	-0.868359	-0.797734	-0.739665	-0.976933	-0.912015	-0.279299	-0.946789	1.37681	-0.28169	0.045341	-0.146159	-0.417743	-0.56615	0.196175	0.112924	1.90738	-0.761417	1.34418	1.00875	1.88513	-0.544894	-0.114284	2.97782	-0.462384	-0.013655	0.322632	-0.660423
19.19_328.24055Docosahexaenoic acid	Negative	-0.460222	-0.71833	-0.616918	-1.19259	-0.858531	-0.939079	-1.45859	-0.911905	0.173227	-1.22018	1.42194	1.48442	0.757693	0.252299	-0.008807	-0.324573	-0.505786	0.118111	1.83711	-1.10903	1.54351	0.675275	1.56152	-1.23089	0.285547	1.772	-0.393127	0.10874	0.396023	-0.438873
19.545_280.24051Linoleic acid	Negative	0.117245	-0.57439	-0.882917	-1.16351	-1.04797	-0.481335	-1.37961	-1.00163	0.570883	-1.31994	2.17411	0.337052	0.568508	0.473276	0.474115	-0.676193	0.263612	0.299789	1.75034	-1.07347	1.14806	0.428364	1.19394	-1.11291	0.090421	2.17713	-0.473122	-0.473942	0.202559	-0.608466
20.499_282.25621Oleic acid	Negative	-0.32128	-0.54478	-0.511876	-1.24092	-0.968972	-0.622093	-0.937949	-1.04246	0.040769	-1.22258	2.22495	2.1728	-0.061534	0.098607	-0.13814	-0.20622	-0.456622	0.248879	0.443499	-0.085395	0.266199	0.130195	0.593412	-0.512984	0.047261	3.12226	-0.74691	-0.563323	0.665098	0.130107
0.824_180.06329D-(+)-Galactose	Negative	-0.838818	-0.873264	-0.97243	-1.36464	-1.22792	-1.17282	-1.06872	1.31501	-0.281419	-0.589479	-0.469067	-0.449375	-0.051387	1.89293	-0.457948	-0.358599	0.743903	0.04172	-0.196943	-0.369901	1.50976	0.607022	1.48265	-1.22198	0.866006	0.452974	-0.664501	0.374582	1.7194	1.62326
16.71_298.25105ricinelaidic acid	Negative	-0.449399	-0.603977	-0.357901	-0.722152	-0.692294	-0.81945	-0.631033	-0.897195	0.232558	-0.796634	-0.389813	-0.724667	-0.414356	-0.899738	-0.783431	0.627278	1.67434	-0.037971	2.05792	-0.10421	2.88891	0.786784	1.10992	-0.916612	-0.200331	1.69462	-0.14032	-0.885659	0.508783	-0.113963
17.609_436.28297tenivastatin	Negative	-0.257443	0.05406	-0.537305	-0.950674	-1.15461	-1.01284	-0.674577	-0.892957	-0.253203	-0.74184	-0.797571	-0.859666	-0.629599	-0.325934	-0.059486	-0.516178	0.469963	0.834487	1.14421	-0.183134	0.210232	1.64189	-0.173997	-0.870003	1.48521	2.91696	-0.524283	-0.300754	1.72421	1.23483
0.89_139.060912-(Trifluoromethyl)pyrrolidine	Positive	-957.586	-878.94	-603.283	-828.149	-813.906	-282.427	-825.475	-461.754	160.592	629.6	-204.685	-229.393	-119.348	-157.619	58.3932	630.701	621.667	279.043	1440.83	518.721	35.79	268.895	118.729	768.871	-23.3734	-244.461	551.421	227.139	60.6812	259.328
0.894_117.078972-(Methylamino)isobutyric acid	Positive	-1397.1	-1370.19	-1250.63	-1326.12	-1250.94	-939.407	-1309.51	-1161.44	-738.767	182.282	-956.001	-1012.73	-954.505	-912.198	-814.024	1.39969	12.9585	-306.805	6980.24	-242.104	-472.835	-456.155	-559.385	14020.8	-783.219	-1007.53	-96.3345	-389.879	-707.629	-782.202
0.997_138.050924-methylthioanisole	Positive	-279.196	-242.063	-172.099	-245.204	-324.327	-237.867	-271.805	-208.165	-208.741	41.2111	-192.019	-296.957	-235.518	-185.806	-258.811	-42.6169	-220.277	45.4993	1636.69	-74.2139	-69.5128	-48.942	63.9319	1932.62	-40.2432	-220.89	333.247	33.8387	-35.7937	24.0262
1.003_137.04767Methyl isonicotinate	Positive	-974.403	-863.277	-661.481	-829.657	-1139.57	-931.852	-959.787	-733.068	-780.76	23.618	-764.208	-1036.96	-819.812	-650.814	-901.416	-135.659	-792.165	231.884	5957.15	-446.624	-249.224	-149.497	292.795	7069.27	-123.438	-757.977	1097.24	177.276	-67.774	-79.8096
1.003_137.04767Methyl isonicotinate	Positive	-974.403	-863.277	-661.481	-829.657	-1139.57	-931.852	-959.787	-733.068	-780.76	23.618	-764.208	-1036.96	-819.812	-650.814	-901.416	-135.659	-792.165	231.884	5957.15	-446.624	-249.224	-149.497	292.795	7069.27	-123.438	-757.977	1097.24	177.276	-67.774	-79.8096
1.067_152.03339Xanthine	Positive	-148.09	-304.225	-277.667	218.58	-449.762	191.366	95.0952	336.236	107.893	-138.545	-163.694	-236.114	-59.5012	-171.971	-251.873	80.5097	247.415	22.1127	-269.715	-261.746	454.477	-12.6276	292.635	-423.491	-253.338	859.89	-257.916	504.47	-47.6073	317.205
1.074_123.03208Nicotinic acid	Positive	-486.97	-568.03	-525.458	-591.135	-603.325	-593.412	-591.281	-584.283	-511.485	-545.224	-567.442	-555.483	-508.118	-521.766	-432.694	-26.4133	478.115	615.345	1185.48	155.349	1216.08	455.274	617.382	-575.456	849.931	644.887	274.594	998.541	798.679	498.312
1.076_121.089162,4-Xylidine	Positive	-26.1557	16.8677	-225.977	-38.7165	34.3968	59.3262	-106.268	227.239	392.047	-551.052	387.984	589.583	-238.201	344.865	153.574	443.987	37.8636	209.616	-10.9661	-38.4556	-298.007	-328.238	-246.324	-407.484	-134.724	54.5783	-31.9967	-232.048	-5.94067	-31.3729
1.082_126.04294Thymine	Positive	113.164	82.5532	18.9588	-253.686	-300.391	-220.887	-321.937	-301.45	20.9635	-148.963	-98.2292	-199.577	-21.2439	-151.025	279.881	170.062	468.792	-87.4151	372.997	-203.347	129.356	78.4187	532.431	-333.655	314.227	-113.417	-102.564	95.5829	312.733	-132.335
1.105_244.17845Leu-Leu	Positive	-182.159	-138.196	168.976	-198.559	-205.418	-203.178	-205.617	-170.167	-197.963	-207.239	-157.488	-203.189	-199.372	-141.796	-187.536	-116.87	173.488	-58.4073	686.616	-158.507	893.194	12.5905	446.142	2.97463	77.2131	-119.432	-38.9063	118.757	545.662	-35.6128
1.119_230.16291-BOC-4-(2-hydroxyethyl)piperazine	Positive	-228.136	-210.759	157.295	-241.776	-242.791	-234.669	-241.816	-148.34	-235.782	-119.999	-130.642	-236.079	-242.156	-137.97	-237.716	-74.2138	187.426	-40.2801	288.231	-147.551	957.51	-6.22239	538.52	562.631	68.1704	-171.644	-56.5467	437.9	249.346	-61.9412
10.843_270.05258Genistein	Positive	-158.922	-124.727	-154.154	-159.858	-166.171	-163.652	-166.936	-166.065	-158.023	-161.778	378.87	-164.85	-160.042	-147.589	-155.672	-137.815	-85.7046	-126.72	783.123	-84.8865	92.7682	194.674	531.629	114.41	-133.003	1171.74	-108.892	-109.327	-112.523	-159.9
11.31_315.24057Decanoylcarnitine	Positive	1489.92	623.166	866.367	-47.2121	-438.515	-406.343	577.312	-124.688	-249.544	855.259	246.813	-414.822	-364.079	-108.678	504.004	-389.365	-407.512	-325.814	202.31	-320.288	-102.405	-407.381	-166.02	-294.207	-20.0763	-405.175	-21.4164	243.058	-184.49	-410.175
11.35_243.18326N-Boc-L-cyclohexylglycinol	Positive	-146.776	-250.874	-192.663	-68.6017	-263.185	-301.779	-343.071	-35.4844	-113.431	-191.369	-192.637	-213.201	-47.1293	-258.332	-168.129	3.6433	-188.637	-187.897	-267.988	-214.198	-220.454	-185.35	-203.451	5281.79	-198.234	-196.277	-38.331	-135.634	-265.149	-197.166
11.352_313.06575Triazophos	Positive	800.563	-79.5984	9.04415	-20.5251	-135.614	-131.979	-135.595	-107.08	16.4137	141.775	-63.1245	-135.463	-82.4799	-122.823	-14.5905	-105.888	20.4625	-89.5277	49.3816	-110.65	211.744	-54.7904	26.2325	-108.839	-13.7461	-122.617	21.4118	479.186	-31.876	-109.406
11.857_321.09827MFCD00056730	Positive	-142.282	-146.418	272.088	-142.426	-149.616	-149.904	-149.708	-140.828	-147.057	-139.744	-148.052	-149.7	-143.737	-136.341	-148.196	-148.653	-146.115	-126.58	-3.97736	-150.115	632.235	-147.999	330.989	-143.605	97.0874	-130.898	-125.764	1835.05	140.428	-150.163
11.982_341.25616trans-2-Dodecenoylcarnitine	Positive	1338.1	17.1243	390.027	-128.885	-364.891	-306.714	596.966	113.35	-182.477	658.822	351.554	-342.446	-351.706	460.187	1285.92	-323.906	-363.618	-262.747	55.9388	-261.422	-219.481	-340.851	-160.335	-288.559	-119.561	-361.137	-99.0775	-170.793	-266.029	-353.348
11.996_299.28209Palmitoyl ethanolamide	Positive	-191.299	-329.91	-348.484	-219.508	-249.769	-318.341	-131.689	597.297	227.5	-348.71	-199.975	21.6582	30.8889	797.7	322.596	-288.975	769.354	-122.092	-320.474	169.007	172.996	-202.837	-250.078	-69.6829	-197.93	-250.204	-217.772	10.3208	1486.19	-347.773
12.238_321.09825MFCD00056730	Positive	731.598	-97.6178	91.5266	-219.776	-274.605	-269.207	-273.794	-258.774	-116.751	797.803	-190.882	-270.621	-14.3082	-266.622	-112.456	-112.814	331.546	9.28828	-121.813	-254.807	331.009	86.3505	651.142	72.2418	-271.794	-156.841	14.2611	463.133	-139.039	-157.377
12.369_359.1076N,N-Bis(2-pyridinylmethyl)-1-benzothiophene-2-carboxamide	Positive	248.322	1281.08	63.9303	-640.671	-641.148	-641.067	-640.756	433.06	542.449	-637.409	-613.014	-640.431	1064.55	722.418	883.504	690.868	109.534	-31.0631	1166.91	-641.359	-621.849	488.31	-636.325	326.296	22.9601	-591.202	-129.929	-637.907	335.095	-635.151
12.562_321.09824MFCD00056730	Positive	1042.58	-282.799	-34.4162	-195.971	-306.049	-270.177	-295.283	-199.43	-169.39	-303.23	-209.323	-296.499	767.883	-243.709	-169.259	-180.096	684.358	-61.7632	548.699	-269.23	-303.297	-288.968	-302.449	-57.857	228.893	-242.113	-86.2563	937.502	727.329	-169.678
12.571_345.09821Nitralin	Positive	-154.05	-183.278	478.051	-202.371	-210.124	-210.192	-209.564	-132.944	-199.626	-204.529	-202.085	-209.178	-206.214	-188.872	-156.6	33.2932	230.672	-22.1028	-2.35875	-207.032	850.487	-180.638	-125.721	-208.421	525.785	-208.049	-197.221	895.661	1016.73	-209.507
12.612_339.081253-(Allylthio)-5-(4-chlorophenyl)-4-(2,2-dimethoxyethyl)-4H-1,2,4-triazole	Positive	130.125	-183.911	317.443	-195.742	-201.715	-201.781	-201.169	-147.908	-193.405	-198.01	-194.862	-200.793	-171.141	-185.084	-164.192	-9.46468	71.6193	-43.5702	56.2687	-188.821	171.631	-185.871	-153.601	-200.055	212.034	-200.522	-191.845	430.073	2425.3	-201.035
12.612_339.081253-(Allylthio)-5-(4-chlorophenyl)-4-(2,2-dimethoxyethyl)-4H-1,2,4-triazole	Positive	130.125	-183.911	317.443	-195.742	-201.715	-201.781	-201.169	-147.908	-193.405	-198.01	-194.862	-200.793	-171.141	-185.084	-164.192	-9.46468	71.6193	-43.5702	56.2687	-188.821	171.631	-185.871	-153.601	-200.055	212.034	-200.522	-191.845	430.073	2425.3	-201.035
12.739_321.09824MFCD00056730	Positive	1052.58	454.086	-331.811	-331.875	-333.339	-296.274	-325.08	-223.582	47.4003	-330.836	-323.451	-328.536	770.33	-292.092	185.556	-108.012	684.508	54.3638	545.119	-333.5	-332.073	3.42213	-331.456	250.617	216.519	-295.611	601.095	271.326	-288.645	-330.748
12.945_345.09821Nitralin	Positive	337.495	-228.218	-329.228	-307.303	-340.396	-338.269	-340.461	-302.2	-112.649	-338.752	-316.783	-338.836	-132.02	-330.269	-157.433	1307.22	-181.245	57.8174	133.569	-197.444	-315.086	242.372	-331.116	464.518	-39.6322	-287.437	183.988	794.778	1952.56	-209.546
12.963_339.081283-(Allylthio)-5-(4-chlorophenyl)-4-(2,2-dimethoxyethyl)-4H-1,2,4-triazole	Positive	594.833	-169.608	-285.295	-238.345	-287.55	-287.201	-287.779	-285.624	-49.7719	-285.911	-263.577	-284.984	-50.6466	-285.277	-79.6359	1513.2	-125.468	134.898	-133.006	-113.74	-274.592	302.206	-281.594	381.848	-108.246	-246.498	26.7746	1042.84	588.341	-160.596
12.963_339.081283-(Allylthio)-5-(4-chlorophenyl)-4-(2,2-dimethoxyethyl)-4H-1,2,4-triazole	Positive	594.833	-169.608	-285.295	-238.345	-287.55	-287.201	-287.779	-285.624	-49.7719	-285.911	-263.577	-284.984	-50.6466	-285.277	-79.6359	1513.2	-125.468	134.898	-133.006	-113.74	-274.592	302.206	-281.594	381.848	-108.246	-246.498	26.7746	1042.84	588.341	-160.596
13.215_353.096972-{[(2-{[5-(Trifluoromethyl)pyridin-2-yl]amino}ethyl)amino]carbonyl}benzoicacid	Positive	246.812	452.095	161.545	-569.265	-722.034	-705.701	-721.362	-155.795	321.811	1160.74	-348.94	-629.142	751.326	-303.172	368.116	-423.965	1072.91	202.476	165.334	-486.51	-584.465	394.088	-687.465	-7.71697	1165.46	196.053	-234.013	83.1264	72.2875	-234.644
13.215_353.096972-{[(2-{[5-(Trifluoromethyl)pyridin-2-yl]amino}ethyl)amino]carbonyl}benzoicacid	Positive	246.812	452.095	161.545	-569.265	-722.034	-705.701	-721.362	-155.795	321.811	1160.74	-348.94	-629.142	751.326	-303.172	368.116	-423.965	1072.91	202.476	165.334	-486.51	-584.465	394.088	-687.465	-7.71697	1165.46	196.053	-234.013	83.1264	72.2875	-234.644
13.519_361.1296Bisacodyl	Positive	-108.44	-141.495	817.134	-228.878	-265.249	-264.987	-265.236	-236.606	-260.506	352.946	-264.569	-264.518	-240.748	-128.734	-149.188	-224.644	-118.686	-64.2347	35.9975	-264.87	2078.85	-121.14	764.547	-252.926	-265.435	-141.887	-15.5653	578.505	-74.393	-265.039
13.528_258.12053{(3S)-3-[(tert-Butoxycarbonyl)amino]-2-oxopyrrolidin-1-yl}acetic acid	Positive	326.161	-182.376	70.1793	-295.358	-507.377	-182.841	-232.796	67.8175	499.786	-217.739	277.429	-225.081	-358.216	-140.357	685.984	-228.915	-90.5427	-250.383	405.741	-71.7663	173.345	245.8	-80.6119	-311.598	738.778	-303.117	-120.078	152.654	435.415	-279.938
13.947_349.12956MFCD00237073	Positive	-134.632	127.722	107.709	-355.766	-370.674	-371.322	-369.376	134.466	-186.676	698.825	-220.54	-351.686	127.432	127.148	-10.4002	-115.558	436.232	-41.8298	68.9385	-308.58	199.832	-11.3051	932.713	-123.27	338.624	-85.4051	-98.7905	140.114	34.3007	-318.245
14.066_375.25189MFCD05720464	Positive	2274.14	470.942	2014.65	1748.59	1699.06	1340.72	1129.4	4215.21	3458.22	1715.03	2853.95	1620.75	2242.8	968.328	3468.92	-2048.36	-2139.63	-2122.89	-2172.25	-2090.18	-2080.63	-2124.02	-2102.43	-2013.63	-2163.22	-2194.75	-2051.5	-1877.16	-2092.62	-1947.45
14.079_397.23372N-[[(8R,9R)-6-[(2S)-1-hydroxypropan-2-yl]-8-methyl-5-oxo-10-oxa-1,6,14,15-tetrazabicyclo[10.3.0]pentadeca-12,14-dien-9-yl]methyl]-N-methylcarbamic acid methyl ester	Positive	1432.23	357.263	1050.34	1275.54	1170.5	947.77	859.532	2437.97	1909.14	677.654	1727.86	867.675	1202.73	480.806	1990.39	-1227.11	-1312.53	-1276.46	-1325.02	-1243.69	-1160.54	-1226.71	-1248.87	-1178.96	-1294.82	-1305.09	-1236.95	-1051.43	-1206.85	-1092.38
14.079_397.23372N-[[(8R,9R)-6-[(2S)-1-hydroxypropan-2-yl]-8-methyl-5-oxo-10-oxa-1,6,14,15-tetrazabicyclo[10.3.0]pentadeca-12,14-dien-9-yl]methyl]-N-methylcarbamic acid methyl ester	Positive	1432.23	357.263	1050.34	1275.54	1170.5	947.77	859.532	2437.97	1909.14	677.654	1727.86	867.675	1202.73	480.806	1990.39	-1227.11	-1312.53	-1276.46	-1325.02	-1243.69	-1160.54	-1226.71	-1248.87	-1178.96	-1294.82	-1305.09	-1236.95	-1051.43	-1206.85	-1092.38
14.103_391.14018Dimetotiazine	Positive	-166.894	-9.60497	315.474	-189.773	-179.249	-180.308	-171.635	-48.2212	-2.79128	314.459	-166.258	-177.189	-35.2725	-136.525	603.961	-172.607	-141.877	-153.791	-44.1566	-189.094	424.277	-13.0492	282.314	-166.21	760.258	-120.475	-73.9994	-132.751	121.686	-150.696
14.126_303.15007MFCD09866183	Positive	351.877	-134.999	161.927	-177.457	-170.735	-171.531	-165.009	-172.959	-148.265	6.26377	-157.477	-174.992	-130.418	-166.715	-163.919	-171.68	-123.933	-148.875	-161.92	-179.947	777.946	-167.471	234.609	-175.318	3.82134	-182.664	407.652	889.077	591.057	-177.947
14.346_347.11386Met-FMDP	Positive	256.175	-112.242	-36.8595	-164.456	-203.697	-197.43	-197.64	-172.652	-185.485	-152.846	-190.311	-202.188	-188.641	-190.79	-131.19	69.4271	86.8219	214.016	47.9822	-126.703	254.499	156.724	-134.545	-124.353	170.915	-191.641	320.283	742.203	750.135	-165.514
14.424_414.20384Bis(4-ethylbenzylidene)sorbitol	Positive	899.391	-180.805	-226.917	189.776	-222.059	-229.537	-240.935	1.95122	-72.2843	-203.677	-145.147	-169.191	-206.853	-178.279	-112.144	561.442	-137.387	79.6993	-219.677	-203.53	-263.833	-78.3817	133.556	2463	-224.993	-209.645	-177.687	-161.256	-253.826	-210.771
14.666_499.26974(2R)-1-{[(2-Aminoethoxy)(hydroxy)phosphoryl]oxy}-3-hydroxy-2-propanyl (5Z,8Z,11Z,14Z,17Z)-5,8,11,14,17-icosapentaenoate	Positive	-161.212	-93.9078	-347.33	-170.479	-237.072	83.5114	377.077	1577.44	216.047	-54.438	-210.713	-42.1653	-132.742	1106.48	37.6412	-42.1266	-318.981	-349.504	178.99	-232.508	-176.459	-341.294	-285.49	856.453	-256.08	-36.796	-366.055	-209.604	-294.862	-73.8158
14.967_380.25349MFCD02673200	Positive	-202.689	-221.984	-225.565	-189.222	-241.548	-101.651	-187.658	6.7256	-186.926	214.87	810.727	-187.198	-188.529	-229.69	458.386	66.7052	22.7141	308.912	-63.974	162.135	-101.887	-57.7428	-56.8763	168.405	-119.414	63.4208	161.808	148.817	209.53	-240.6
15.212_423.33453Linoleyl carnitine	Positive	138.296	1078.73	70.561	-268.689	-178.532	-229.952	173.646	182.869	-304.539	175.396	1322.55	58.4203	680.246	332.867	138.648	-287.928	-289.307	-156.042	-115.256	-263.354	-232.786	-177.811	-125.568	-292.419	-313.779	-175.21	-128.603	-245.428	-264.695	-302.336
15.737_399.33448Palmitoylcarnitine	Positive	166.34	767.467	820.679	-132.851	-181.668	-221.034	100.125	86.9994	-280.117	264.777	1201.75	-196.51	603.638	136.762	168.779	-251.914	-275.589	-131.028	-85.7005	-292.963	-239.271	-250.984	-205.723	-299.414	-257.257	-125.599	-175.687	-236.23	-234.825	-242.958
16.143_425.35016MFCD22416941	Positive	189.388	456.472	695.44	-241.021	-153.911	-175.918	27.7261	138.528	-249.905	269.449	1093.55	33.3199	351.489	249.684	131.843	-237.078	-229.436	-56.5486	41.2942	-258.677	-164.277	-186.816	-176.676	-290.915	-225.09	-193.388	-131.38	-265.988	-215.401	-225.754
16.355_234.161763,5-di-tert-Butyl-4-hydroxybenzaldehyde	Positive	-91.6615	-241.957	-43.6102	-122.076	72.715	-7.37699	104.73	443.552	309.47	732.976	118.746	-38.5303	76.7954	241.54	23.3618	30.7101	15.5346	-60.4033	-227.266	38.2064	-243.049	-273.23	194.484	-284.113	-190.929	-183.003	21.4231	98.4316	-274.882	-240.588
2.696_204.05667MFCD01924790	Positive	1522.74	320.866	-193.253	247.639	-146.199	-327.834	-89.47	-223.561	-220.037	-333.529	-209.684	-170.013	-71.0098	-239.35	41.7433	22.0281	178.991	-37.1276	-332.012	-247.551	307.617	66.0662	-21.0556	-333.135	150.313	-306.725	-303.947	-75.9249	1187.34	-163.92
22.018_337.33407Erucamide	Positive	-426.441	-68.5683	-111.078	-261.1	-6.02046	-393.562	-78.7086	223.456	-329.788	129.395	-386.772	23.4221	-50.4113	-321.512	-253.412	-118.812	17.5551	535.808	-659.163	-207.58	-234.672	-155.999	907.74	400.207	-12.484	113.672	644.938	332.464	51.6473	695.78
4.067_204.05669MFCD01924790	Positive	746.888	89.9594	-128.888	13.0119	-132.824	13.0469	-114.17	-189.667	141.556	-294.722	-237.147	-174.406	-150.199	-243.026	261.789	105.46	146.558	-129.184	-249.98	-224.602	334.822	67.0082	13.5185	-314.866	50.0379	-284.502	-278.436	-16.27	1360.69	-181.454
5.375_219.11049D-PANTOTHENIC ACID	Positive	-202.846	227.59	-29.7793	-180.675	-106.806	-18.3956	122.49	406.219	594.788	-19.3104	-78.7878	230.484	577.953	348.018	278.62	-256.839	-117.659	-319.501	106.59	-191.458	-78.0282	-370.386	18.7807	-425.221	412.823	143.168	-339.116	-354.446	-218.263	-160.005
6.208_129.15174Octodrine	Positive	850.671	58.4103	137.405	-167.496	-344.533	-388.911	-221.416	1245.7	-20.4327	-287.101	14.2586	-154.093	33.8367	-15.3941	39.9934	-93.6811	-44.0412	-2.77953	-165.041	-210.043	-150.189	-235.43	3.81834	756.336	-5.23246	15.1879	-213.586	-245.621	-30.7948	-159.804
6.351_244.17845Leu-Leu	Positive	-177.999	-159.886	221.6	-211.769	-212.421	-211.015	-211.353	-123.669	-198.588	-174.733	-161.487	-210.297	-192.688	-121.933	-193.288	-131.512	73.7021	-122.368	300.582	-178.314	509.984	-23.1978	530.808	982.299	148.501	-156.529	-74.0952	148.224	436.146	-104.706
6.489_244.17846Leu-Leu	Positive	-121.124	-114.494	361.064	-129.613	-130.682	-129.807	-130.633	-123.682	-130.313	64.0519	-127.343	-130.575	-129.146	-93.7872	-127.818	-126.963	-55.5313	-93.9908	-100.681	-118.158	1170.71	-122.66	615.317	-21.8221	-34.7056	-120.451	-71.7783	286.852	112.882	-125.115
6.761_244.17846Leu-Leu	Positive	-158.623	-155.452	160.5	-205.069	-205.063	-197.098	-204.385	-25.1838	-168.59	102.204	-124.848	-189.264	-180.43	-54.8446	-171.672	-115.953	86.8868	-53.4923	199.293	-173.903	678.778	-58.2574	263.641	862.56	56.6702	-149.469	-9.43995	21.7354	373.936	-205.168
6.814_129.15174Octodrine	Positive	-35.9541	-40.0994	-43.4913	-42.5503	-46.9798	-47.4367	-46.2229	-32.2801	-40.6194	1205.67	-41.6033	-43.7437	-43.1384	-39.424	-39.728	-42.6304	-41.796	-42.241	-43.2964	-43.8371	-34.9236	-45.8904	-36.5911	-43.9238	-39.4027	-42.1949	-42.9289	-37.9379	-41.6175	-43.1878
8.124_246.10356MFCD03832701	Positive	413.824	84.3775	-92.911	-114.698	-239.672	-233.056	-227.937	-152.692	-65.6136	-221.535	-171.082	-187.733	-153.98	-128.933	4.54813	-31.5117	-30.5977	-115.093	-13.1123	-216.366	925.358	-20.0323	139.114	16.6266	232.133	-235.764	-177.728	69.3535	1071.15	-126.441
9.398_260.11922MFCD07784454	Positive	752.896	177.407	-172.828	-173.814	-410.729	-387.451	-395.015	-305.899	-143.034	-399.184	-318.137	-335.246	-288	-298.224	-12.0476	-52.3638	-16.3519	-214	-119.047	-360.239	1634.05	-46.4576	367.335	-383.277	517.874	-406.188	-297.172	325.275	1913.71	-153.845
9.72_287.209345955761	Positive	372.303	392.351	419.64	-51.0668	-256.061	-223.093	290.201	-56.4074	-255.925	436.493	-17.7393	-222.04	-225.762	0.87382	98.5392	-258.345	-225.309	-260.227	54.0151	-196.511	267.697	-235.241	-30.3699	-48.6837	138.076	-210.729	-103.16	668.199	-64.7957	-196.922
