# Supplementary material for: Multi-omics analysis to examine microbiota, host gene expression and metabolites in the intestine of black tiger shrimp (Penaeus monodon) with different growth performance
Source: PeerJ. 2020 Aug 14;8:e9646. doi: 10.7717/peerj.9646 (PMC7430268; doi:10.7717/peerj.9646)
Supplement: Supplemental Information 7 — Metabolome data were acquired by positive ESI mode (1,004 metabolite features) and by negative ESI mode (360 metabolite features). [file peerj-08-9646-s007.xlsx]

## Sheet: 1004features_POS
Supplementary Table S2. Metabolite profiles comparing between Top- (T) and Bottom- (B) weight groups of 5-month-old P.monodon (n=15/group). One thousand and four metabolites were acquired by positive ESI mode.
Primary ID	B1	B2	B3	B4	B5	B6	B7	B8	B9	B10	B11	B12	B13	B14	B15	T1	T2	T3	T4	T5	T6	T7	T8	T9	T10	T11	T12	T13	T14	T15
0.894_117.07897	4.97934e+06	5.0144e+06	4.0447e+06	2.6143e+07	4.24091e+06	3.54121e+06	3.59179e+06	3.27874e+06	4.74937e+07	2.59996e+06	1.91971e+06	4.68296e+06	3.79278e+06	2.82918e+06	2.60304e+06	738328	819952	1.1825e+06	953597	1.18156e+06	2.12631e+06	1.00395e+06	1.45299e+06	2.73476e+06	5.52788e+06	2.07599e+06	1.90396e+06	2.08052e+06	2.20882e+06	2.50654e+06
1.182_187.06326	15301.1	84095	63075.8	304457	22296.7	269188	93842.5	36626.4	3.64396e+07	132657	19584.8	55607.6	13575.9	52966.6	13352.6	4002.07	2603.31	2883.07	5323.98	4291.91	7806.55	6970.09	125089	19950.6	5965.28	3684.98	8510.94	3593.41	49296.5	5188.56
14.066_375.25189	1.58446e+06	1.38038e+06	1.41781e+06	1.30743e+06	1.49094e+06	1.51231e+06	1.41528e+06	1.46357e+06	1.66211e+06	1.32763e+06	1.25714e+06	1.57745e+06	1.96726e+06	1.4855e+06	1.81011e+06	1.12497e+07	7.2177e+06	1.06695e+07	1.00746e+07	9.96382e+06	9.16256e+06	8.69003e+06	1.559e+07	1.38974e+07	9.99953e+06	1.25462e+07	9.78872e+06	1.11796e+07	8.32987e+06	1.39213e+07
11.853_321.16064	20041.2	15832.8	21656.5	18598	13561.2	7.40817e+06	14790.2	9.3489e+06	214781	452408	15437.3	15686.3	312832	989308	14981.3	19866.5	36653.9	7.42517e+06	14661	14571.3	14148.4	12127	69965.2	31662.8	1.00686e+07	17454.3	13709	23388.2	44181.6	20214.1
12.503_315.15007	4964.05	69402.1	10313.5	254052	3157.27	2.91077e+06	3799.59	6.38683e+06	7502.67	104935	5941.45	18148.3	1.56005e+06	198852	3254.52	41721.7	17278.6	2.94011e+06	3484.94	3240.79	2829.33	3210.95	547739	5066.71	9.02729e+06	5545.83	9605.27	10528.3	68852.2	4795.54
14.73_541.31696	325937	141752	131400	447005	298499	214047	118574	301170	64648.3	184520	345308	198902	362585	185582	272948	867470	451697	146092	570848	578270	1.21074e+06	455136	1.20543e+06	1.1521e+06	234307	379882	561884	442528	618396	1.09491e+06
12.201_321.16063	18687.7	532898	11287.6	6.50839e+06	8557.98	1.70148e+06	5.99041e+06	390895	6.78241e+06	1.0554e+07	10113.5	24449	3.14063e+06	6.73419e+06	6629.48	4.12283e+06	7.56701e+06	6.14337e+06	8549.35	7843.73	6914.41	7480.13	8.61327e+06	61585.9	162528	11257.3	9474.04	6.40859e+06	5.99409e+06	6.11182e+06
0.875_234.15779	1.38171e+06	1.4158e+06	1.30529e+06	9.74898e+06	1.3643e+06	1.34853e+06	1.32823e+06	1.03029e+06	1.65106e+07	891173	651232	1.63507e+06	1.08771e+06	1.07242e+06	1.04758e+06	242955	272101	411118	277931	327817	758807	309824	560172	1.22475e+06	1.95299e+06	943668	675810	760690	825239	1.03978e+06
11.597_321.16065	3501.04	4309.07	2743.69	10680.5	3161.11	96771.5	6788.78	106302	70514.2	6150.66	3009.75	2898.14	12861.1	6084.12	2843.88	8279.86	3952.99	8083.94	3422.68	3107.84	2841.78	3096.29	8304.65	4322.72	1.31656e+07	4083.25	3574	3845.93	8722.14	3954.23
1.003_137.04767	2.17728e+06	964342	2.85634e+06	1.34341e+07	1.60275e+06	1.96746e+06	2.15171e+06	2.96888e+06	1.54889e+07	2.19986e+06	1.02751e+06	4.45514e+06	2.75545e+06	2.3027e+06	2.28047e+06	627646	832959	1.20579e+06	895074	322484	706262	654651	1.07353e+06	985415	2.47156e+06	1.016e+06	512072	913264	1.2255e+06	762494
5.459_187.06325	5101.84	28893.8	20167.5	102933	9328.1	86928.8	28143.9	12450.6	1.40082e+07	48878.2	7745.67	20813.9	7563.27	18999.4	10352.9	2681.1	3362.29	2911.03	2514.39	2782.75	2565.39	2932.92	37933	5145.24	13785.3	3497.89	5237.27	2188.72	20380	3605.96
15.432_519.33262	157725	130523	78916.8	264712	142442	97976.6	79605	207360	95810.1	89629.4	168510	157352	139405	130765	161677	324401	153315	72579.5	292751	232470	375202	185280	316204	458677	100642	471832	248326	227190	342639	300444
12.94_315.15005	956730	1.19243e+07	5.19043e+06	3.62306e+06	7452.89	3.27088e+06	3.08171e+06	7.40816e+06	399342	3.42619e+06	2.56356e+06	1.25395e+06	5.40142e+06	648823	18081.2	3.07572e+06	6.66796e+06	3.9448e+06	15248.9	5088.08	5512.17	4727.71	8.5699e+06	99914.7	5.83036e+06	69896.7	17295.8	3.88144e+06	3.20692e+06	5.79255e+06
12.958_442.22537	2819.95	4095.83	5554.67	20087.8	629.615	1432.04	1379.12	2078.91	5737.97	1135.74	1257.19	1485.51	941.563	11484.1	973.64	2466.05	1252.93	1022.35	1182.18	699.926	4126.79	603.862	2400.19	829.043	64687.6	902.811	2630.09	2129.32	1161.78	1660.85
15.488_567.33258	116927	69014.6	61473.3	233073	100047	106771	105706	205904	26324.3	81516.9	149492	80481.3	163289	63199.2	124031	339732	144358	95388.8	226620	104877	290708	137642	287521	382071	81847.1	226298	237397	178352	308718	335360
11.363_321.16063	3350.43	1656.17	1621.82	1872.46	1548.51	7029.57	1815.09	2154.83	5179.96	1849.97	1444.94	1742.87	3816.88	1658.18	1425.95	2268.55	1951.96	2396.18	1782.57	1938.49	1594.33	1666.47	2020.82	2049.67	756943	2130.15	2079.78	1842.53	2120.31	2447.27
12.449_321.16062	3.7986e+06	3.33829e+06	2.23576e+06	2.79414e+06	12925.7	169146	5.86806e+06	61314.9	6.68006e+06	352594	2.6952e+06	2.46442e+06	190539	4.04028e+06	453940	4.14747e+06	7.53367e+06	126644	17888.2	4530.46	12519.3	9838.44	7.60843e+06	3.79586e+06	70936.9	125437	16936.9	6.29241e+06	5.8665e+06	5.99589e+06
12.658_335.17628	14321.1	278304	69698.8	735921	5516.98	241373	449878	643490	5823.21	534035	10844	6242.25	13609.9	85197	4326.88	230956	371612	2.83462e+06	9132.14	2873.92	2977.43	3110.98	4.41126e+06	6329.62	3.70661e+06	10783.4	3924.48	13056	8.15387e+06	317045
14.862_493.31679	10683.4	5531.39	3714.46	15010.7	8536.37	4794.29	3391.39	11536	4316.64	4462.85	8053.11	8161.28	8144.06	8184.56	7939.37	22458.6	9198.86	2782.3	23958.8	10319.7	15162.5	9146.61	22097.3	15377.5	5735.26	23057.2	12501.9	12795	20092.6	13689.5
13.238_315.15005	2.52459e+06	249867	3.62793e+06	2.72348e+06	777086	2.52109e+06	2.77952e+06	279882	2.28013e+06	4.48114e+06	2.28328e+06	2.19784e+06	4.94242e+06	2.37876e+06	1.40829e+06	1.59262e+06	293714	3.02638e+06	385762	2687.52	50619.1	4499.85	419476	3.97259e+06	1.96084e+06	940085	222962	3.50558e+06	2.86672e+06	5.55984e+06
1.165_165.07895	632.429	584.484	114396	526353	25569.6	169632	85244.5	32590.8	7.44335e+06	87948.5	15476.7	67406.5	9929.44	614.475	202926	341.488	3043.06	2947.09	2599.25	446.4	4591.79	2844.93	651.812	14313.6	32124.9	3314.03	4621.46	408.005	14056	432.221
14.079_397.23372	790648	678512	725860	662119	768873	878019	791173	762082	853846	701768	688279	777724	1.02125e+06	817239	967497	4.28143e+06	2.87037e+06	3.78014e+06	4.07575e+06	3.93786e+06	3.6455e+06	3.52967e+06	5.60161e+06	4.90744e+06	3.29093e+06	4.66949e+06	3.54036e+06	3.98017e+06	3.03254e+06	5.0141e+06
9.994_294.10347	1.01937e+06	894964	653412	259326	342847	1.92044e+06	803439	1.37901e+06	130825	1.44706e+06	90636.6	418672	1.20843e+06	3.40473e+06	572510	3.39383e+06	1.45969e+06	1.54383e+06	1.43177e+06	33601.3	120673	106472	696412	816398	471329	232333	216286	581229	454206	1.6734e+06
12.419_291.15015	57874	1.43455e+06	63633.5	945556	4152.43	6.91889e+06	283817	3.49805e+06	91211.5	556387	8108	681639	1.08174e+06	169763	10179.3	648282	202386	4.52881e+06	5600.8	3604.88	3390.1	3529.97	492025	122487	4.95939e+06	5658.37	5036.22	134635	596629	135663
15.919_495.33242	73337.5	35180.3	32302	129764	40875.9	29422.6	26851.7	60668.4	60959.5	41208.9	61720.6	47675.3	58180.9	30444.6	45075.8	46252.7	61890	20101.7	65007.9	59480.9	87260.5	68718.8	145275	146765	26284.1	89747.7	89675.5	48645.2	64688.5	77209.7
16.413_521.34817	71618.6	31093.4	27675.2	110055	41198.6	33605.1	37544.2	63680.4	38500.8	28620.3	67970.5	37437.4	64858.9	30481.8	53451.2	84815.1	61279.2	20703.6	96621.3	60304.1	115540	68734.3	130787	128130	41521.2	138484	54786.1	56521.9	80076.6	79995.8
12.254_277.13451	187141	431887	471789	229194	4755.53	639550	356887	1.46466e+06	188387	1383.42	60784.3	390824	6.53212e+06	2.0249e+06	89707.6	920950	104798	642931	10662.4	723.951	5338.21	1051.88	29509.7	262250	4.08544e+06	6663.84	1044.16	165932	13406.3	105066
12.693_321.1606	3.44006e+06	6427.08	1.95167e+06	119838	896312	6600.11	100521	5217.89	153098	37293.2	2.4475e+06	2.13979e+06	3911.64	6060.66	1.9319e+06	730240	194541	9089.39	491702	11474.4	158122	11769.6	184506	3.36287e+06	10567.5	2.31346e+06	1.3269e+06	92377.9	61255	1.26341e+06
12.052_277.1345	1863.75	303459	274099	229194	7449.19	629866	252628	23212.8	188387	249598	59401.3	70717.1	3.47066e+06	353864	3778.59	920950	114501	522191	6051.77	1248.56	1313.6	1015.84	29098.2	3409.46	4.08544e+06	3859.01	1064.32	165932	13453.9	123436
12.613_301.13444	426534	930151	111438	806090	7564.63	898030	10874.8	179974	18692.9	1.09381e+06	13111.9	58946.4	763399	3.26838e+06	4432.15	1.03721e+06	6892.22	805372	5779.45	1475.03	1447.27	2157.17	153226	19433.9	8908.05	14057.3	1818.92	4034.34	53023.1	102750
14.629_517.31687	11333.8	7965.68	6562.19	25965.8	6298.49	7182.51	9498.58	24981.7	9732.06	5025.35	13477.1	10409.4	11527.7	9391	7043.26	24205.9	9925.49	2750.85	16254.1	11681	16966.6	9487.36	25027.1	30910.2	5788.64	39714.8	16121.7	23033.1	27533.7	25670.3
11.35_243.18326	501069	308617	309358	229195	283032	276771	311906	293790	5.78394e+06	299011	300970	459057	361667	232036	300080	350515	246324	304587	428759	234002	195374	154044	461906	383890	305882	304613	284031	450251	238859	329143
26.114_368.34395	3.58871e+06	1.32362e+06	1.37348e+06	873775	610315	609904	2.45243e+06	2.19039e+06	457728	829170	2.22889e+06	885180	1.84092e+06	980035	1.43399e+06	3.7081e+06	786898	3.29393e+06	953035	1.63731e+06	1.08579e+06	1.70331e+06	2.81855e+06	3.25959e+06	1.1579e+06	1.00342e+06	231347	2.68547e+06	3.12664e+06	773645
5.365_187.0633	2033.68	2387.69	6459.77	33673.6	2691.93	39541.5	10480.7	1349.92	5.71121e+06	2814.44	1122.28	1016.2	945.59	1172.6	4698.5	982.566	1034.03	916.194	946.897	959.382	944.057	892.747	14891.3	1003.26	3691.42	1098.73	1080.61	1021.72	1530.24	1027.38
12.051_550.26262	2.545e+06	1.96257e+06	2.69492e+06	1.99226e+06	2.16083e+06	2.05197e+06	1.91927e+06	1.79614e+06	2.28295e+06	1.92839e+06	2.02584e+06	2.26317e+06	1.83648e+06	2.25069e+06	2.24699e+06	2.48429e+06	2.52558e+06	2.42925e+06	2.45192e+06	2.41057e+06	2.0389e+06	2.34548e+06	5.19039e+06	4.43966e+06	4.36941e+06	3.49438e+06	3.10342e+06	2.98941e+06	3.30524e+06	3.37956e+06
15.542_497.37164	533.663	581.302	532.498	620.626	737.345	622.635	541.84	689.897	509.74	817.198	577.061	634.779	634.143	781.238	625.467	3003.33	836.758	525.161	610.253	703.25	901.005	658.582	963.329	1166.02	953.191	731.288	663.022	1488.51	825.668	1387.63
12.865_291.15013	331475	1.69921e+06	3.91263e+06	4.36244e+06	49089.3	3.59802e+06	1.66553e+06	3.41886e+06	817371	2.20997e+06	3.06854e+06	3.13141e+06	706129	125021	25092.9	1.77424e+06	1.84589e+06	3.8153e+06	901677	2298.65	44952.2	3236.82	1.16192e+06	234364	226145	212899	40407.5	1.11633e+06	1.3505e+06	1.07675e+06
11.339_291.15016	2807.2	2203.56	2157.86	2491.34	2060.33	4824.83	2415.01	2925	6291.93	2315.7	2087.06	2318.92	2572.54	2206.24	1957.91	3018.34	2597.11	6860.16	2371.74	2208.49	2121.29	2217.27	5254.13	2727.13	103792	2834.21	2563.01	2451.52	2821.11	3256.14
4.111_165.07898	2352.88	6800.32	26240.1	80581.2	4062.3	25933.5	12960	8670.56	4.5827e+06	19795.3	3693.12	8309.21	1553.48	8761.07	20569.2	1120.24	1088.31	1024.93	1951.46	1043.12	1174	1018.82	3943.77	1250.1	8603.3	1216.42	1032.84	1063.76	3107.31	2045.42
12.939_301.13442	4.36413e+06	163371	1.03256e+06	228882	210787	10101.7	888254	11797	1.56182e+06	256190	92983	632222	2.82463e+06	3.23266e+06	192948	1.03721e+06	287585	22919.6	75914.6	1449.03	3528.69	1359.78	100556	361137	13329.7	44911.1	5686.13	412161	53023.1	439986
12.283_335.17626	2616.95	3688.23	2839.86	3970.81	2264.61	464903	5972.82	807166	8333.24	77639.9	2372.29	2657.49	35295.4	6356.96	2382.64	3743.63	5273.11	3.54934e+06	2699.39	2419.78	2575.78	2164.73	6379.99	3630	4.29939e+06	3060.43	3062.81	4067.24	39904.1	6192.1
12.904_335.17626	77037.1	9061.3	401695	613637	18213.4	22532.1	445513	273096	250499	372563	233522	248201	35692.9	2251.77	14075.3	420913	368798	2.81219e+06	41505	1469.34	1607.63	1378.84	4.09972e+06	89020.9	994637	66313	5339.75	229032	481278	1.68154e+06
10.56_182.98125	583.354	526.925	445.286	505.896	478.806	568.319	474.072	538.225	583.077	459.061	440.413	485.748	502.963	455.61	425.094	568.248	514.525	517.196	504.795	437.694	456.583	447.677	543.636	732.448	634.467	572.115	509.571	563.29	562.057	582.895
13.13_291.15014	675714	157580	3.91263e+06	178423	215455	124962	1.66553e+06	120280	1.20144e+06	1.37841e+06	3.06854e+06	3.13141e+06	1.3954e+06	429065	694202	766773	1.84589e+06	164907	1.44793e+06	3646.23	89058.1	9092.16	56970.2	823829	363871	813788	54394.4	1.11633e+06	77151.6	1.07675e+06
14.96_541.31704	10537.3	5310.07	6377.32	20762.1	6946.41	7052.86	2992.01	8673.28	4467.31	6315.4	7301.73	15045.2	13792.8	6068.91	9739.7	11831.6	12261.5	3000.87	25129.2	11648.4	20105.9	21754.5	25642.9	42020.2	8132.77	15663.7	18252	13580.6	17236.6	27482.4
14.344_467.30099	4190.22	1451.34	2358.38	8644.33	2712.58	2814.35	631.732	3530.1	2005.33	1357.38	4661.06	3327.86	4441.1	1895.4	3980.78	6831.47	2707.95	1467.89	7626.07	1558.07	3910.47	3050.89	6945.27	6533.53	1508.84	4744.95	4647.16	3805.7	4914.08	4934.71
11.82_335.17628	3597.02	3921.99	3446.97	9450.12	3893.03	16127.9	3865.34	26901.9	4697.65	4716.23	3307.54	3565.62	5193.95	5104.35	3138.24	4897.42	4147.86	9159.61	4205.71	3954.67	3652.98	3610.24	5014.84	4831.77	6677.37	4742.98	3803.21	4125.09	5171.46	5001.53
11.866_277.13451	2306.11	5115.53	18895.1	7132.51	771.211	1841.17	4729.87	766506	44673.4	226182	2583.53	11761.3	3.47066e+06	250761	1656.08	4459.98	1899.66	522191	2125.53	929.402	838.245	900.33	9472.6	1591.85	29365.3	1037.31	902.842	1428.36	4195.97	1899.19
3.89_165.07898	1979.5	6800.32	2035	16239	2323.79	6569.26	8229.38	1870.37	3.45369e+06	9348.88	1665.39	7105.61	1342.12	5302.86	15304.2	1554.44	1304.56	1630.93	1347.68	1229.57	1375.52	1673.03	2289.51	1339.24	2776.88	1337.2	1225.93	2107.13	1507.37	1312.12
26.013_368.34394	1.62044e+06	257758	1.37348e+06	873775	184697	207470	1.26184e+06	229765	457728	829170	2.22889e+06	597361	1.84092e+06	437159	629508	1.60522e+06	786898	3.29393e+06	953035	606267	1.08579e+06	250728	1.17882e+06	1.78169e+06	1.15687e+06	1.00342e+06	409861	1.37551e+06	1.28647e+06	417401
13.703_181.00199	802.588	589.59	464.865	836.191	542.71	828.049	601.266	1375.28	947.257	721.012	509.709	814.395	895.37	446.767	545.216	1663.95	603.696	777.731	1129.06	1564.97	1091.77	1930.74	4379.16	2639.72	2935.28	1273.69	1886.27	925.35	3581.28	942.843
6.429_237.0999	3157.65	6021.56	2513.49	9978.07	3570.97	5967.6	3800.09	4485.21	2555.17	15045.3	14277	3809.03	2701.68	2214.04	14399	2837.19	5299.74	2501.94	6951.43	2509.51	4078.2	2116.36	2999.2	5215.13	1989.15	4634.77	1909.58	2819.13	3324.86	4274.44
12.344_301.13441	14483.4	124083	32974	53794.7	1128.41	939755	42955.4	292670	16251.8	160612	5140.71	28137.7	2.47486e+06	3.26838e+06	2058.2	113307	12460.4	805372	2851.74	1110.96	1127.11	1126.79	10371	10348.7	440020	2883.86	1332.96	34241.4	6722.51	11301.3
13.455_315.15002	1.87528e+06	3.15159e+06	979454	2.72376e+06	777086	31634	668158	158555	2.28013e+06	22109.1	1.03269e+06	1.04669e+06	1.01827e+06	1.74982e+06	1.40829e+06	1.58257e+06	107618	106698	443235	11813.3	166033	16899.2	46427.3	117029	1.2263e+06	940085	686213	150904	39680.3	896680
13.601_317.16569	128538	260221	325595	1.51988e+06	3897.41	3.00018e+06	737010	1.78619e+06	83121.9	559268	198406	1.46451e+06	895567	1.09573e+06	85805.3	1.39934e+06	211874	2.64192e+06	269590	1520.11	1798.02	1573.72	107850	99849.8	1.67673e+06	22652.4	1945.75	90149	102881	170096
13.001_335.11394	86152.8	390720	490855	807133	45229.5	2.98713e+06	507695	276224	491443	1.53839e+06	656829	708524	439611	59765.5	19459.7	733127	394979	981614	318023	4089.22	13280.2	2913.44	202344	209956	63920.2	32682	8257.73	291650	305384	220708
0.892_256.13976	886650	949766	1.03056e+06	2.92151e+06	1.00413e+06	1.12285e+06	1.012e+06	771943	2.51183e+06	658019	530090	1.14102e+06	767064	801046	838749	189591	235019	336642	219805	256078	612292	244157	429701	933271	1.14551e+06	757638	513981	563716	600763	803067
7.47_340.1089	1155.15	1138.16	976.843	1020.75	882.589	1015.65	843.017	924.392	1178.82	862.863	870.8	787.09	902.909	837.184	770.565	837.005	877.783	928.314	824.345	808.895	785.457	758.12	782.343	913.581	934.754	931.976	862.131	813.068	833.453	968.683
12.839_321.1606	71031.2	3090.85	33432.1	2515.48	896312	1863.73	15603.8	4799.32	7227.81	6897.06	2.4475e+06	2643.45	2457.64	7317.94	1.9319e+06	3669.25	16084.7	5848.49	491702	11406.4	313701	11510.1	5143.13	988342	10261.7	2.31346e+06	1.3269e+06	2613.49	4386.89	65081
26.285_368.34395	1.96827e+06	1.42321e+06	360674	229989	762106	654542	1.25498e+06	723255	969432	894028	1.12418e+06	542096	859992	1.49094e+06	1.01065e+06	2.10289e+06	1.26885e+06	1.29063e+06	1.57537e+06	967278	730404	929678	1.63973e+06	2.32186e+06	272865	1.91638e+06	233593	720308	1.69696e+06	1.15334e+06
11.774_277.13453	766.868	3154.98	3907.6	6205.28	638.567	614654	2759.05	766506	4941.68	7323.02	1578.61	2231	81743.5	249601	591.092	4985.11	793.381	358474	1130.98	597.056	707.539	637.056	924.718	2887.96	3293.82	1384.73	721.402	956.269	2758.9	978.424
1.074_123.03208	393626	718611	807005	1.17425e+06	510706	1.19396e+06	703898	808318	39968.1	958111	826035	587516	1.05384e+06	925098	731620	96965	44751.5	72173.9	29868.5	22016.9	28401.9	29774.9	34282.1	81173.9	59442	45130.1	52833.5	83342.9	74551.9	131926
14.376_317.16568	118582	343143	971647	759260	11735.2	1.46223e+06	653729	2.19091e+06	148457	539554	547792	1.08479e+06	492713	365561	8519.86	952269	763787	1.18688e+06	205680	1756.59	4333.98	3410.16	892863	116935	2.01968e+06	140851	15116.5	35668.1	584776	239419
13.195_359.11392	239243	1.23282e+06	653391	927941	18150.9	1.14383e+06	988618	1.36806e+06	631052	1.84883e+06	580772	456311	647129	721038	152586	678258	931474	626338	77966.1	3279.89	11809.9	4029.86	312122	617491	38937.6	184078	47517.3	834075	404855	870017
11.189_277.13454	722.177	907.959	630.133	780.485	639.328	8487.28	672.253	1524.62	1376.27	1138.24	653.401	1530.46	2874	6479.68	612.968	768.26	727.434	2041.66	675.925	634.988	656.915	616.86	867.399	846.03	350546	868.261	802.408	1732.78	2558.86	1916.72
11.348_225.17273	187579	133599	158774	87200.7	133086	127867	147256	137609	2.7448e+06	139061	170992	210175	172706	110389	141528	169505	105840	133775	202704	112940	91172.5	73409.7	216702	182212	192367	149304	147173	254028	125534	158747
12.732_277.1345	298962	1.67316e+06	772252	1.85351e+06	1530.59	1496.09	337062	2327.15	837937	928809	50804.4	1.66844e+06	782573	48382.1	1632.91	2.32589e+06	1.41172e+06	2199.58	1367.47	1020.54	20405.5	8070.35	105216	610248	4857.29	4443.04	8333.36	1.8717e+06	84008	677300
12.542_277.1345	187141	565282	471789	1.85351e+06	49146.7	1574.83	217406	5295.4	308626	928809	111051	390824	145183	2.0249e+06	139452	2.32589e+06	14137.4	642931	290982	837.625	30998.5	12045.4	105216	262250	4203.09	196104	14518.8	34340.1	84008	256738
12.063_291.15012	3074.73	4465.46	6969.92	5615.44	2362.79	2.07517e+06	5822.33	1.41059e+06	4006.47	277199	4450.59	3269.13	1.33427e+06	130970	2841.4	3857.58	4965.41	988588	3975.45	2945.03	3098.45	2396.12	320495	4776.25	1.53723e+06	3520.03	2510.46	3900.85	56900.4	9170.34
15.001_471.3558	781.743	958.053	719.403	719.321	1010.78	772.664	841.486	709.48	1511.56	754.719	788.307	839.038	822.46	817.03	668.359	930.812	684.45	1033.92	1157.6	729.673	526.832	643.275	796.517	1080.01	633.817	1123.12	815.432	871.112	908.285	2716.57
12_322.1639	10253.5	5184.05	6965.68	138278	5214.4	1.24742e+06	51388.9	1.18169e+06	48913.8	1.30152e+06	5821.82	7214.6	361078	789123	6270.65	6583.88	69194.1	874752	6763.01	6499.36	6837.94	5287.97	102357	10540.7	128876	7768.31	5540.31	41254	14514.3	29353.8
15.507_543.33267	81545.3	28302.3	30108	119725	58712.5	50982.4	36922.6	62166.1	13058.3	40527.1	71185.6	46792.6	64857.8	25279.2	42719.7	139626	88705	52816.3	132748	64817.8	230428	91429	244516	215235	52805.7	82818.8	129664	83526.4	122507	188151
1.184_145.05274	1669.05	9231.55	3918.75	24610.2	1714.46	18029.4	6373.85	5721.74	2.57475e+06	9004.47	1251.7	4320.39	1181.54	3892.08	2669.38	1199.06	1339.24	1898.71	891.211	1074.57	1445.96	1448.48	7983.1	2521.68	2985.2	2224.49	1281.89	1493.13	4422.89	1848.67
9.398_260.11922	213848	234189	122548	176182	39946.4	1.16641e+06	217184	450912	26933.6	535942	13992	75569.3	427154	1.32437e+06	156527	668693	343632	145804	145247	11427.2	24575.5	20303.5	70639.6	162633	17948.2	63727.2	54063.4	80749.9	74974.8	236620
11.188_308.11911	9628.69	6334.06	4671.52	795.953	3190.06	24221.4	5486.37	11282.9	1755.28	10585.8	788.76	2699.84	9095.1	27086.3	3236.21	20228.5	5025.29	9385.57	14793.4	1092.65	1004.21	1069.08	6274.34	6995.43	4702.44	1414.98	1472.13	7233.06	3188.4	19386.6
10.455_254.23562	513.95	3655.75	5333.77	154088	934.164	477.405	3441.96	43127.7	15534.3	439.59	416.997	6411.19	16345.9	18006.6	366.236	470.443	426.417	442.397	487.123	387.392	447.473	433.248	511.788	534.051	537.231	524.64	474.083	468.986	552.475	510.672
11.982_341.25616	24994.4	6509.23	53462.8	201805	54079.9	73602.5	17107	101134	41448.1	120114	7664.17	129648	96265.9	51935.5	11290.1	798627	183738	357317	115773	5916.93	32997	453644	228529	90827.2	482436	339409	16364.7	12054.3	389975	774337
14.57_361.19198	2092.86	16718	47634.8	76920.3	7296.36	287933	72005.8	264689	4884.2	171467	275732	33383.2	10036.7	6323.58	2832.63	47500.7	53069	2.39767e+06	20405.4	1395.5	1361.31	1381.72	744627	6739.14	1.26071e+06	18367.6	29031.9	213757	1.25411e+06	400518
0.89_139.06091	1.26603e+06	1.26091e+06	1.0668e+06	1.72501e+06	1.20259e+06	928988	1.06105e+06	975977	1.34431e+06	895469	770212	1.22112e+06	1.0374e+06	943090	1.05563e+06	366195	410751	566924	439527	447596	748703	441041	647106	999694	1.26541e+06	792748	778749	841095	819412	941793
15.737_399.33448	32839.5	23792.2	79035.8	96357.3	17153.1	37671.1	33194.9	50491.1	14687.8	30797.8	81110.4	61969.4	38833.2	39370.1	36262.2	192673	422391	442726	78339	59683.8	44640.3	167370	162354	22062.1	230291	588351	54012.1	359785	181370	193606
11.576_303.15012	1658.32	1545.38	1299.59	1832.19	1497.31	54188.2	2149.45	4572.87	18943.5	1713.44	1425.61	1372.75	5918.01	2683.72	1347.04	1999.46	1885.24	2645.13	1621.2	1433.31	1346.05	1466.6	2177.41	2047.52	2.29197e+06	1934.09	1692.88	3366.26	3907.83	1872.98
13.802_305.16573	112716	425672	162499	131405	65770.4	310268	114876	1.21012e+06	100304	608467	94279.9	54863.4	377437	160796	55016.5	132530	195457	238495	32426.6	2303.62	4745.78	2621.83	238770	135008	1.42587e+06	77859	38114.5	149787	292313	180785
1.121_203.11556	60582.3	95651.8	50760.9	2.18388e+06	41255.8	82269.7	84548.1	131982	2.00753e+06	100051	26786.5	159472	101333	70194.2	50236.2	16272.1	37706.8	31891	14714.9	9487.42	41516.9	2985.51	59414.9	22818.5	108147	17074.7	41805.3	7452.11	38362.9	58238.1
15.212_423.33453	25192.8	24637.4	78316.8	94745.5	35091.3	47404	69548.3	90591.7	23384	14780.1	70595.7	89369.2	42311.9	34551.2	19389.3	196876	575685	169593	32942.6	69257.6	48545.9	211116	214830	18502.2	211820	673896	164702	415174	275250	197018
1.109_219.1105	394624	565722	225779	610412	350016	708221	211496	773466	37694.5	1.1833e+06	937730	199082	237678	592847	513105	639388	985827	702879	642337	584060	739840	713521	1.30293e+06	1.13468e+06	3618.73	673823	977213	1.10564e+06	1.19484e+06	1.13914e+06
15.708_519.33255	53022.6	37894.1	39203.4	68305.1	44968.1	27245.4	40432.9	47766.2	41560.9	35951.4	60212.5	48962.8	46201.8	31616.7	43702.6	58829.2	64772	33493.3	69616.2	36150.5	60959.8	43503.1	73216.9	180294	68596.4	57436.8	75025.3	72476.5	67541	95235.3
13.531_305.16579	3245.92	19367.1	3758.22	26910.6	1470.98	310268	7197.17	155842	2165.09	11954.9	1743.8	28155.9	11975	18861.9	2570.42	20713.3	34353.1	63445.3	1312.22	727.547	800.37	730.984	63131.7	7606.29	114442	4455.89	4802.26	6800.31	120523	23893.6
11.898_343.1425	7137.39	20925.8	9269.1	35486.9	6938.71	1.11709e+06	8723.94	1.4031e+06	10436.5	132414	7746.99	9600.33	120698	600284	8344.24	7477.52	22213.4	888087	6907.63	6045.2	9099.11	5038.31	37912	14026.2	704107	10337.1	7372.38	21720.8	9675	23449.9
10.602_282.24169	676.254	2853.3	517.188	5673.34	1475.02	658.824	611.751	6403.25	961.882	1069.04	547.183	2163.43	1397.02	29436.5	500.377	690.429	527.19	599.561	565.235	498.876	504.443	492.924	661.029	756.905	735.508	694.427	610.068	652.996	667.698	675.723
12.01_365.12446	9943.07	14832.3	4852.84	57009.5	3632.76	762257	4761.39	1.09047e+06	11038.3	958413	4055.94	5026.26	232793	1.16417e+06	4368.63	12167.5	17449.2	1.12202e+06	4711.64	4527.96	4763.85	3684.01	125303	7843.04	238303	5412.01	3859.81	73905.6	64894.6	58972.3
14.581_317.16567	242935	1.31167e+06	971647	759260	194545	17181.5	653729	111211	297836	539554	547792	1.08479e+06	897304	715308	218821	952269	763787	1.18688e+06	329753	1635.45	45965.1	3410.16	892863	191894	27072.9	447687	58957.9	261668	584776	585677
12.653_254.15163	3358.46	9363.25	3881.79	38993.6	4458.15	11683.6	8021.78	72167.7	8760.28	15793.4	3081.89	3962.77	18962.3	14052.6	2987.58	22349.3	4364.25	7782.93	19149.1	3296.46	3250.01	5777.41	20154.9	12485.7	13106.3	81503.3	4653.38	4579.1	25713.8	42249.5
12.025_359.10761	9653.59	3298.55	4432.18	63455.1	3317.86	687818	20560.7	661918	48475.8	762534	3704.35	4590.56	257526	933814	3989.94	83050.2	6572.47	727043	4303.22	4135.46	4350.89	3364.67	111720	6706.88	659960	4942.88	3525.23	77599.2	21544	15899.7
11.852_303.15012	2508.77	3092.49	1657.1	1774.96	1476.33	885390	2395.42	1.06124e+06	7115.93	53488.7	2454.96	1584.43	12564.7	14531.6	1426.12	3027.62	16093.3	1.02604e+06	1753.41	1779.15	1689.04	1723.5	2278.91	2646.9	157649	2155.51	1728.31	2142.16	5250.75	2898.22
11.491_359.10753	3209.88	2519.65	2467.4	2848.71	2552.85	36906.8	2761.43	3523.87	8649.69	5143.44	2430.62	2651.56	5251.79	24586	2430.73	3409	2904.54	4296.01	2764.09	2577.55	2361.87	2535.33	10669.3	3490.94	1.95037e+06	3297.55	3697.41	3105.9	3372.36	3723.22
12.212_305.16574	1169.69	1562.62	1152.84	14630.8	1598.4	4712.63	16874.1	5624.36	1.94004e+06	33296.9	1612.63	3226.07	1926.56	3567.02	1012.98	22086.9	21168.7	4341.27	1341.58	1056.72	1071.16	973.473	10913.8	2057.97	2998.42	1376.26	1377.34	13430.9	10751.5	7680
7.714_340.1089	451.164	471.186	349.837	397.081	335.201	394.126	329.025	374.536	491.608	317.281	321.532	301.049	322.895	313.569	299.335	358.707	356.738	319.545	332.102	304.338	342.057	299.471	330.43	329.344	652.343	348.569	317.473	305.363	362.777	336.886
14.022_515.30109	686.603	882.319	934.87	1748.62	895.811	872.575	839.141	2596.69	810.212	659.445	1158.19	1196.91	1499.12	1041.63	566.123	2590.34	1312.35	678.346	1803.95	817.62	1428.63	864.854	1036.69	2756.28	700.732	1597.4	1105.09	1413.18	2922.65	1119.51
10.843_270.05258	9676	26299.8	13215.3	303465	26560.8	83234.5	115743	223236	90138.4	11211.2	427437	18902.6	18764	17744.5	2630.52	2942.65	13851.2	4463.76	2643.99	630.246	1433.62	386.234	664.085	3229.58	2031.59	174504	1051.5	2585.31	6557.98	3979.59
15.705_567.33262	8117.05	2992.22	5056.1	9944.42	6123.42	4349.87	3939.56	13531.7	2495	3629.59	7435.88	18802.7	9300.38	2686.34	11765.2	10750.6	7004.37	4044.87	13892.1	5097.11	10042.3	5237.4	14121.3	27931.6	9017.43	10247.9	10756.7	6354.99	10150.1	16514.4
11.768_359.10757	2430.71	3202.95	2582.08	2532.32	2143.11	687818	2862.66	107630	13776	24899.2	2298.38	2300.04	5245.31	36404.3	2070.23	2963.04	7186.31	44381.4	2455.22	2582.71	2329.39	2501.92	3691.92	3274.29	1.8849e+06	3129.05	2508.9	10202.5	3489.76	4216.16
1.859_273.99992	84220.3	81536.3	193666	116767	114110	95932.2	4722.25	30680.2	677.725	51641	79873.6	12238.8	56166.2	17098	32772.8	32596.8	70626.7	6221.68	43881.1	29488.5	187457	17391.5	72005.9	127174	36811.9	62474.3	64222.4	27235.2	217186	216642
6.906_237.09991	1667.05	6593.33	1510.28	8233.92	1569.97	2979.8	1315.05	4109.82	1466.3	8530.38	9452.42	2790.56	1802.38	1467.02	10586	1362.4	5074.6	1120.4	5811.06	1170.02	4151.77	912.498	3066.3	3557.66	2069.58	2709.05	988.761	2199.39	1998.96	2988.65
13.874_331.14495	78043.5	117105	78223.9	111422	15172.6	140533	244203	362328	23381.2	138784	45513.7	131203	147770	300718	35662.8	211058	128400	399089	25128.4	1976.98	1292.16	1821.08	225234	59915.4	710237	5908.24	32870.5	181736	243383	212515
11.348_265.16512	197664	109533	98101.5	83111.7	98204.9	98023	109458	100418	1.86323e+06	107787	88153.9	154829	127029	81099.3	106323	126508	80828.4	113372	147615	82114.7	69823.9	53213.5	153566	133980	19696.1	103061	92322.9	131431	74622.3	113657
1.857_155.97354	172499	190566	294513	338179	316491	217391	50343.1	119998	6641.03	193765	168403	106307	151162	85385.2	133527	133682	194878	63223.2	144409	93433.1	259792	73839.7	203379	259630	149828	200264	176888	137801	345845	286350
13.215_353.09697	170306	1.00716e+06	520526	499762	135340	80576.7	627650	22993.1	403015	1.0589e+06	516936	276502	453802	447743	276148	545313	660079	497643	89074.3	3666.65	12797.6	4042.24	320230	587242	1.05626e+06	212250	55599.1	827368	237837	613130
11.832_301.13448	4953.94	6860.29	3642.23	22932.9	994.257	155040	8447.53	121257	17772	31910.6	1292.61	3553.4	12162.2	22502.4	3738.42	9556.62	9876.77	41499.5	1002.99	1125.63	1015.22	937.84	43990.5	11634.3	1781.5	4689.41	1624.91	13849.2	16677.5	15554.2
16.423_543.32976	13791.7	5738.35	4928.62	21659.7	9598.97	10318.1	8251.75	15467.1	8543.12	6421.65	15878.7	6297.62	11749.8	6693.83	12052.2	17803.9	13692.8	4540.61	20683.1	12084.6	25379.4	11796.6	26127.1	22781	7534.48	23963.9	10462.9	11485.4	16341.9	17226.3
12.177_301.13445	7114.44	56502.7	6597.57	48206.3	1625.02	939755	43118.2	292670	16886.8	62294.4	6910.51	3460.89	468522	493700	6493.91	13220.4	19866.1	211270	2851.74	1026.51	1132.28	1209.66	14509.9	6110.61	440020	2858.56	1756.5	23407.6	13606.6	10158.6
13.816_317.16567	268268	773756	573009	1.51988e+06	70523.7	169756	737010	77534.1	248434	559268	338972	1.46451e+06	895567	1.09573e+06	226875	1.39934e+06	487399	159124	601723	1264.65	12025.1	3957.28	1.19964e+06	173996	1.67673e+06	705814	55694.1	184410	527415	357184
1.082_126.04294	143733	215905	81528.6	192761	53520.3	133899	121593	231279	22038.9	178563	75246.8	77868.9	125740	178202	70676.4	129987	122592	107228	41358.7	30075.2	49282.7	24869.8	29819.3	107712	66659	78916	54431	97515.1	66161	170265
11.852_337.15553	13677.9	57822.3	1893.24	320831	42623.1	1376.1	287353	225455	1.56601e+06	861182	14059	4008.33	436127	896604	1277	251804	21832.9	765583	105094	899.536	3558.77	749.467	976367	49676.4	3137.12	21179.9	8499.16	5554.91	365563	67948.3
13.321_291.15011	367029	80677.7	67924.1	1.19845e+06	544864	30643.1	33602.7	23948.4	384069	85687.4	120853	671010	1.34391e+06	420124	694202	761736	43319.8	44869.5	1.44793e+06	3646.23	151177	19211	19865.4	823829	114564	813788	151152	225216	13980.9	33731.2
14.079_347.17628	21430.4	42052.1	40865.4	113301	7111.54	241838	99981.9	232157	11819.4	581681	43614.9	49756	30373.8	124352	17541.1	64938.6	169166	303105	4816.89	5081.97	4846.38	6776.63	18864.5	212321	384917	14696.6	5540.6	141702	71878.9	687334
12.686_335.11394	27356	350447	254468	166170	4088.32	1.64668e+06	96264.7	390711	35489.3	239785	212457	186933	69604.6	44942.4	15965.8	51227.7	44051	1.02651e+06	9921.95	1309.68	3418.43	1511.69	221245	19015.2	181724	52565.3	8766.95	16277.5	258991	33910
26.164_369.34722	292131	199511	374541	223264	182647	183623	289175	158534	220003	90102	483837	202838	307043	170313	375942	216704	177365	411205	84209.1	479759	179011	368475	367914	295649	294722	506316	62623.9	180849	384329	382970
7.196_278.16274	55029.1	223087	90005.8	175738	28881.3	94255.3	105337	17393.8	649137	148294	45625.6	104196	159276	213765	94626.2	36267.7	46019.5	194287	2872.39	2157.61	12300.2	5863.67	90361.8	33748.3	742.325	149590	12749	21329.4	99664	26460.1
1.849_173.98408	214702	209359	332120	346830	312539	257259	56628.9	145888	8719.4	233882	204699	117659	190869	119025	148697	147194	169459	57917	190220	107715	243313	110070	257380	233577	155595	229902	161951	162772	358847	305941
13.239_301.13441	123771	20488.6	149397	13576.3	547187	10952.8	122843	21777.3	36814.5	13884.9	1390.58	192220	35983.7	48086.1	328360	43142.9	7606.43	10072.9	112375	1233.97	94789	8977.28	2230.85	361137	1374.99	76235	46337.4	9296.06	1551.26	59448.1
14.725_361.19196	7490.46	38209.1	74683.6	141889	14931.2	125069	41405.2	192094	13900.1	140852	275732	40265	7196.21	10511.1	6987.99	86004.4	65927.8	82631.5	46405.3	1800.59	1662.92	1164.13	744627	14530.8	1.26071e+06	40195.3	66389.9	212582	1.25411e+06	219758
14.494_445.31886	8705.88	4854.19	16866.1	7538.78	18094.3	6122.85	10265.3	18193.4	6478.91	3106.92	15680.1	27997.7	3842.81	2924.51	11458.4	22045	133813	85410.2	9375.62	11564.6	9897.07	52483.1	133715	2449.26	83557.7	160300	37956.4	140242	77010.8	50104.2
7.508_278.16274	542.124	2366.81	465.938	1385.03	2348.61	331124	730.612	1219.92	2231.32	1196.07	487.524	532.612	1376.55	1105.89	9110.77	903.409	4699.34	1473.28	378.239	385.829	374.65	358.224	480.952	425.041	153178	1255.84	410.979	385.595	7208.14	3603.16
7.36_278.16276	4450.26	16215.9	8074.84	8551.16	2373.28	331124	11944.7	224140	115134	897.215	7676.09	16130.3	4242.11	3649.2	9281.57	1061.59	522.765	1337.53	614.153	386.42	580.86	930.315	1596.94	453.945	153178	1080.57	432.733	2527.07	7049.33	483.754
14.424_414.20384	508430	138558	253457	95004.9	103551	71634.2	169789	281961	1.51487e+06	92191.1	100314	117229	125925	76930.7	99718.1	687298	115578	91172.6	311717	93744	89785.8	83753.2	212307	173016	103473	134452	121726	101792	116915	151919
12.61_227.18833	373282	111946	162229	148419	246814	142759	254977	173368	218214	128821	228611	460213	283588	169577	247243	160900	163740	298546	322235	232232	199925	167407	196416	458638	129145	321880	154609	925030	300904	290665
16.039_238.15669	5999.56	5928.52	4077.22	78222.5	6855.55	15029.9	9865.4	70971.4	1636.35	14941.4	6243.45	4435.63	24748.1	17186.6	4084.62	22367.9	954.125	7223.04	34062.4	447.241	2129.91	7967.29	39848.4	18581.9	5192.18	72773.1	3373.29	1397.58	23211.7	55636.1
14.206_388.20286	96503.7	125858	98843.9	22357.5	55898.1	134746	60813.3	72237	12642	71951.4	8174.94	51699.6	104062	234757	38689.1	107069	54261.5	87582.2	36865.8	16325	107174	21278.1	20973	117600	10488.7	114981	24857	23531.3	23731	73078.4
13.198_335.17627	34588.2	13055.9	17539.5	19469.7	108551	20046.7	7187.14	25802.5	73616.4	18055.9	85843.5	17081.7	11637	20980.7	54022.5	200797	21861	147526	148590	1587.62	3004.45	1939.24	383842	93813.8	1.23341e+06	156303	450488	4209.49	672892	17909.9
13.092_277.13449	3534.78	3690.52	2636.04	2806.43	337101	1253.98	2157.7	1116.71	1302.47	1528.77	43761.4	3525.91	4910.29	4704.03	213385	4763	2419.04	1250.26	195384	2449.46	17679.9	1237.71	1068.06	610248	4165.39	247607	47031.6	1810.81	1243	2732.94
14.261_347.17624	21430.4	94784	84389.2	190841	14553.2	241838	147561	232157	36324.1	581681	94358.1	91998.9	51640.4	124352	33650.1	116129	361384	303105	13110.1	1030.62	11859.2	1061.08	244263	410612	384917	36341.1	14226.1	297619	144049	687334
11.276_303.15007	2112.4	1658.17	1623.78	1874.72	1550.38	3338.69	1833.94	2179.59	5118.8	1728.41	1570.5	1744.98	1935.82	1676.59	1473.31	2271.29	1954.31	4007.88	1784.72	1542.55	1596.26	1730.04	2075.43	2052.15	14017.7	2332.38	1928.65	1844.75	2122.87	2450.22
16.143_425.35016	25383.8	27853.2	83715.3	115330	18404.8	48906.7	41624	44900.6	7988.31	29257.2	39500.6	59536.4	16042.5	32387.8	29042.6	163181	249479	326693	24109.9	52256.2	45145.3	110946	146747	21239.3	189050	455327	112753	215558	182663	144587
14.028_305.16573	319291	663045	443884	576570	135504	578125	282129	1.21012e+06	231077	608467	283911	390211	432317	382573	110575	362441	439363	1.24349e+06	71065.9	8487.38	13770.8	11317.6	481747	267702	1.42587e+06	166353	68983.3	441421	649199	328709
10.488_229.1676	50892.7	26657.5	33183.6	19219	27734.5	31889.7	26831.5	25993.7	1.41353e+06	33669	28934.6	37101.5	40854.4	23805.3	33145.3	34139	21875.1	23249.5	70361.2	18381.1	17758.1	15467.7	49568.2	32906.8	26324	23792.6	28287.4	21921	18885.7	22846.9
11.091_243.21966	45564.1	56482.7	44509.5	234617	31055	254982	49872.5	175008	174264	69425.7	51780.6	174676	206048	260161	59613.3	38457.8	45461.1	87963.6	3304.96	1116.2	16081.5	1602.9	45925.9	11775.9	166006	30538.2	4885.84	24605.4	73569.1	21812.8
12.456_139.03028	11246.4	10500.8	17719.2	21148.5	2658.61	819824	5499.17	664210	13108.3	50265.6	7331.24	16670.4	237347	11715.8	3402.72	7485.33	14404.1	861673	10600.3	2823.79	2655.54	3013.72	46074.2	4071.19	1.40596e+06	6280.89	3383.43	7296.04	59592.4	10328
7.092_278.16276	3274.58	77825.7	7254.23	89942.7	4398.43	257127	60584	147994	130440	129047	1909.22	36622.5	139904	203584	11049.6	10440.3	16546.9	133728	819.275	1143.54	14303.4	733.952	27681.7	12913.9	136259	5804.24	19412	9389.25	8656.43	2737.32
22.018_337.33407	240253	289570	476995	44835.9	208150	198352	226804	611503	427955	278706	324330	516462	403456	301899	534849	128999	258423	243050	188795	281044	140890	254756	364033	163954	330016	143346	291692	264990	166947	191575
11.494_289.13449	1398.3	1995.14	1203.65	1469.67	1174.15	810725	1447.28	176303	2095.86	3114.62	1584.33	1838.95	20535	2170.3	1056.32	1822.06	1250.13	3009.18	1361.9	1161.47	1086.31	1092.99	1858.73	1420.59	1.00611e+06	4156.29	1327.51	2642.59	4825.15	3488.9
6.939_278.16274	855.577	12472.6	5781.83	2776.36	3996.61	98461.6	2853.63	7462.86	373688	9489.97	3568.59	8406.66	4909.9	13171.7	7068.85	3364.95	3372.4	6023.22	322.474	385.833	599.83	485.898	5458.88	1198.82	1236.12	3069.42	1077.84	1114.15	7515.02	1731.69
6.117_156.0762	91675.6	68131.5	41150.9	56880.5	90008	47285.4	40197.7	56391	132949	43466.1	34663.6	64003.8	50332.5	74176.6	57940.3	209687	38338.4	67769.9	60369.4	62915.7	83518.7	132700	1.35222e+06	1.02619e+06	404701	435002	169667	321786	383482	222687
11.514_337.15551	714.373	571.556	568.615	685.593	670.149	1.35035e+06	708.464	225455	677.573	766.884	594.916	614.398	177159	274637	587.932	813.444	683.029	1389.4	663.432	628.421	589.207	589.186	821.407	779.106	269631	825.928	757.68	715.762	913.635	865.515
2.872_126.04295	6970.16	14955.1	5480.73	15017.7	1960.79	4728.36	4852.64	12785.1	8435.92	14400.7	7779.93	4516.18	7563.92	4618.53	9412.06	9402.82	8876.89	8347.65	9282.11	8449.98	8189.4	7467.65	1457.67	9455.49	7391.7	6222.43	8367.49	6754.17	7657.81	8157.47
11.31_315.24057	32534.3	23762.2	63255.2	318552	65926.5	171252	23825.5	140500	78534.2	211050	24892.1	210402	338250	131572	22475	940986	521995	639559	197932	8775.19	24327.3	499829	160480	100124	634189	340065	20228.3	44757.9	168220	464392
3.503_136.0385	12041.1	45515.2	59113	38686.2	10190.2	35090	39291.9	61594.6	893646	37824	62898.1	16919.3	45074.6	50463.8	58412.8	23987.7	23155.4	7251.74	6194.48	10934.7	13941.1	11155.2	10523.9	26090.7	17910.4	24973.3	14284.6	13106.2	20034.7	19795.3
0.721_267.99091	33338.1	82946.8	61931.2	178957	44726.2	75050.5	40398.6	46264.5	1.31423e+06	61108.6	91779.5	26856.7	43131.1	79287.7	63420.6	70296.1	63380.9	152930	32558.9	21516.8	44864.2	32901.4	273309	110210	226062	74382.5	74605.1	40453	113725	78731.7
1.185_143.07349	1679.96	3374.59	1561.33	9065.68	1391.19	9117.55	1603.1	2790.38	1.30815e+06	3193.88	1182.78	1781.09	1126.94	2248.31	1377.39	920.862	1069.42	1177.57	897.039	1081.6	1008.3	1005.72	3155.07	1916.6	3004.72	1246.56	1290.27	1311.88	4211.66	1439.26
12.612_339.08125	96067.6	135853	79333	128321	8062.47	184926	9509.94	25343.7	2550.17	204751	2321.15	6578.51	311736	1.29074e+06	2069.21	164561	10471.5	256472	4666.76	1735.88	1703.2	2003.63	28137.4	5813.17	3553.84	5098.5	2188.32	16737.8	9896.12	20147.4
6.518_278.16274	32610.8	148449	65805.9	129243	24596.9	222191	88464.3	103154	463501	108940	39440.1	79111.6	90990.3	132962	65150.8	22263.6	30349.8	117997	2573.43	1525.6	9768.58	5486.57	46371.8	27661.6	15553.5	86753.2	14403.3	12212.2	55984	16325.3
13.237_336.15038	943.799	1162.47	1258.91	994.978	1008.89	8802.01	937.503	2641.67	1189.4	1856.33	895.915	1016.98	955.76	17360.6	1052.19	3088.02	1365.32	1152.34	1191.59	956.748	796.524	893.587	1051.34	1389.25	1066.09	1084.1	1074.03	994.478	1202.76	1214.75
11.949_139.03029	13036.3	44978.2	38523.5	50569.1	5376.17	29932.3	18391.6	138610	15954.8	41720.1	21052.6	29355	24839.8	16600.4	6465.19	22637.7	13768.4	108670	6972.82	6700.99	7050.07	5589.47	11959.2	14159.9	61358.8	8009.3	5712.19	11196.4	46165.8	9901.61
14.666_499.26974	183121	58998.7	45314.4	282254	97767.1	122895	48994.8	74013.7	585981	87199.1	185510	37894	108036	69811.8	168913	129731	159906	46288.8	125576	95720.6	239448	371062	909218	298868	177601	107538	183103	142495	698074	218883
12.369_359.1076	864488	488219	397217	1.1726e+06	2202.37	14830.1	733382	5460.75	628519	432184	34666.4	333226	4436.93	634213	6220.78	578049	1.2465e+06	458702	2647.53	2339.2	2391.13	2592.68	697621	768424	4759.28	20549	2802.8	1.10636e+06	884909	989171
12.401_365.12448	477081	477678	408017	886108	2040.89	4589.62	912168	27378	1.20923e+06	672858	51804.9	492651	3220.13	160080	2051.84	608084	832092	45087.4	2343.83	2167.69	2038.54	2122.64	686657	798658	6700.06	104945	27512.6	1.09155e+06	637671	1.05327e+06
16.704_521.34818	37259.6	16659.4	22973.5	32298.1	27949.4	13462.6	16430.5	30029.5	28145.9	20080	20074.6	20204.6	30204.8	13003.4	29925.3	23697.1	34333.6	16151.1	31968.7	32832.2	44937	27594.1	37038.2	69075.3	29184.6	25107.2	34697.9	29316.3	22321.4	29736.1
3.805_230.01013	26922.9	54898.6	60166.8	308948	64723.7	82986.1	84656.8	142862	21731.5	74790.5	13969.9	82570.6	81044.4	53970.1	42914.3	93280.4	246404	201118	91025.2	51229.4	83508.1	119723	204679	546490	154623	539061	40169.9	337630	1.22225e+06	152142
15.118_481.31663	2200.03	941.138	1122.51	3175.05	1160.19	1161.31	877.776	1764.96	1275.44	1178.24	2127.8	1790.92	2431.32	979.112	1586.79	2263.68	1261.81	749.628	2809.27	1393.8	3388.79	1591.72	4643.24	4588.02	1277.8	2534.5	2619.85	2320.18	1957.13	2135.37
12.945_345.09821	877414	86321.8	213379	253639	77712.7	15188.3	311466	6668.49	429532	161586	29883	280436	605059	1.2204e+06	71280.3	362022	61356.5	7671.9	19324.8	1736.2	2866.89	1701.96	22036.8	122779	2610.1	14286.3	2565.42	112484	7118.48	98977.4
1.113_241.09243	226620	355768	134113	220695	201583	411220	112526	417411	12372.6	731515	528853	125708	132124	344380	298078	365101	566707	402391	333843	349720	386242	430714	777086	610914	579.866	402951	559506	613272	710728	653305
13.087_303.15004	36180.6	67541.4	77212.4	104865	17957.9	8273.23	167177	5243.3	32829.7	111773	5354.37	396485	376443	57668.5	5262.32	540227	21445.5	75274.6	18170.7	1849.48	27814.9	2937.58	12927.3	69996.1	2919.84	36440	4401.15	8955.34	4632.04	94028.4
15.294_555.33248	911.205	1121.28	888.499	2012.63	774.437	776.709	425.066	3749.86	1241.88	864.042	1005.65	984.113	1852.98	759.093	1033.04	3004.34	1811.96	668.016	2672	1999.74	3654.04	1558.2	3245.77	6652.85	790.799	4450.45	3321.52	2126.36	2480.55	3843.71
12.722_359.10761	553384	19263.7	397217	16036.6	250717	2893	286544	3615.57	398943	13918.1	490440	333226	2717.96	3179.86	432785	7779.64	42923.4	3051.55	176012	3709.86	51931.6	10733.8	30844.5	768424	3752.4	534409	391026	34200.5	35571	106160
15.873_569.34819	3922.83	1990.95	1911.34	6725.81	2208.49	3345.48	2334.45	7831.89	2251.63	1848.3	4234.2	3111.97	4631.98	1527.23	4427.38	6879.29	5269.93	1665.2	3257.87	3762.69	8730.99	3367.49	6720.27	18788.2	2699.22	11297.4	4458.8	4319.79	7343.32	10951.8
11.854_331.14488	480.805	747.309	432.093	542.77	457.853	27837.6	541.421	1.17227e+06	1283.44	2053.99	388.194	491.38	4443.72	11688.4	442.283	633.022	472.526	70428.4	465.569	425.45	457.036	459.718	840.795	544.955	1822.35	587.45	536	566.028	720.208	642.791
6.689_314.12728	851.734	1064.7	979.014	941.201	974.957	947.179	773.54	733.031	933.378	749.259	597.661	614.275	923.04	2200.63	756.628	910.307	842.849	644.253	1351.99	1211.93	588.659	574.856	638.078	800.037	579.84	703.85	874.955	977.321	635.682	854.987
15.247_543.33275	1729.29	1433.42	1839.29	4055.54	3758.82	3792.08	2227.08	5936.61	2320.8	1608.31	2830.27	2593	3586.91	2762.32	1398.9	3826.15	5930.94	1745.3	4175.77	3121.42	5583.08	6993.95	3614.87	10110	4666.68	7843.42	3952.84	6190.04	9210.53	6972.31
0.997_138.05092	165426	75197.5	210178	1.0183e+06	149379	151767	162214	219539	1.16859e+06	166632	74886.3	356316	204256	168891	199272	45274.7	64133.5	99666.2	62538.2	22353.9	66264.3	49028.2	81349.2	81056.6	208000	89549.3	36254.1	67457.5	92704.7	55627.4
14.387_305.16573	1676.51	24326.6	48158.9	56531.6	14503.4	21615.6	32999.6	17128.9	16231.5	86764.7	30831.7	94972.1	22636.3	39388	14210.5	94038.5	21806.7	50664.2	12496.8	1103.21	2393.38	5509.14	47731.4	32482	57833.1	19861.7	1340.74	12280.8	17771.1	104150
1.918_131.09467	1147.95	1559.85	3354.62	12684.2	907.099	5349.16	3021.94	1525.16	1.1607e+06	2652.95	1231.04	3507.03	625.273	2964.68	3255.03	639.05	651.065	887.107	690.725	803.685	622.87	609.289	944.33	812.693	930.076	745.531	601.622	596.236	682.313	780.216
13.519_361.1296	21343.9	73676.1	100570	150074	1476.1	1.15904e+06	72464.2	509905	7375.04	1197.04	62217.4	124608	418018	95552.6	1392.49	78736.8	62411.2	535877	19252.4	1289.15	1418.19	1295.24	15435.6	3631.56	306615	1624.81	1650.13	13389.9	68713.4	58611.2
14.481_339.22277	35227.3	41851.8	17014.1	52361.8	6679.76	136980	33600.7	75585.3	26482.5	85758.5	37788.1	14183.5	69958.1	204029	32537.9	80236.1	35058.6	59301.7	18598.4	866.721	783.03	1228.61	26742.4	12747.7	29103.6	9844.62	2361.29	26360.1	25778.7	41740.6
13.578_293.16574	4847.85	62655.3	3180.72	27389.9	2330.35	1.02914e+06	4731.01	456004	23351.6	12277.9	8575.31	9630.45	2533.95	17859.6	2198.36	18469.9	7603.28	1.0218e+06	146126	2035.22	2238.93	2107.01	5597.54	2460.7	300470	5452.92	2605.1	5651.16	8855.59	8554.42
8.124_246.10356	68230.8	68514.5	42291.5	73941	10862	365192	71793.4	121184	83170.4	150052	4841.69	22853.2	99534	410440	38769.8	206439	104197	49175.7	42414.1	3628.97	5682.2	7270.74	30622.8	57647.4	9257.76	24915.7	19748	30223.1	37996.4	79421.9
11.674_365.12444	3255.4	2994.44	3279.09	4057.78	2939.32	762257	3309.62	40243.9	12988.3	5467.37	2798.58	2981.4	4168.9	26223.8	2683.5	4183.68	16458.8	55073.8	3182.54	2889.78	3014.1	2879.05	4492.03	4019.43	889736	4246.72	3323.24	16962.7	7068.7	5233.81
12.714_365.12448	477081	12447.1	408017	43592.9	251589	3748.55	201732	2929.49	247212	4096.17	667630	492651	2455.59	2279.59	624001	3175.89	279603	2756.98	176790	3858.61	50782.7	8853.98	27700.4	798658	3688.01	452507	343064	415068	11873.9	43496.9
1.695_164.04735	2112.16	1876.76	1895.41	4003.46	1513.08	1813.74	1456.01	1471.05	1.12312e+06	1405.09	1436.1	1484.55	1401.26	1608.62	1195.15	1227.79	1287.94	1321.32	1198.69	1216.18	1442.05	1139.47	1963.23	1319.21	1291.08	1291.78	1330.64	1220.6	1229.97	1224.28
16.518_499.38726	434.444	355.208	421.658	385.387	388.133	388.727	359.086	421.088	567.089	321.417	413.023	390.549	518.292	466.522	374.832	851.204	515.412	326.089	359.969	345.448	404.202	313.635	321.16	500.527	510.765	627.193	455.562	654.149	516.843	608.717
10.182_320.17322	10592.5	19846.4	71698.4	37381.9	9709.94	53905.7	24414.4	30686.8	1826.74	141079	17678.5	57131.1	84206.9	87818.3	46991.4	106072	26507.1	63221.9	5149.39	42889.7	16207.8	2372.95	21933.3	31941.3	19086.4	56480.3	4375.65	8197.41	7613.45	48312.8
15.557_521.37144	320.86	305.384	320.159	411.184	457.33	374.353	353.131	414.794	306.476	491.332	346.953	381.655	381.273	469.712	376.056	557.71	485.461	444.131	383.676	422.823	336.032	395.966	579.192	701.059	573.097	385.851	398.636	894.951	496.425	834.301
6.838_384.13516	635.364	531.526	503.253	539.57	494.982	519.126	468.289	466.169	592.651	461.302	453.941	433.508	417.966	410.568	403.948	448.402	468.603	440.06	417.004	440.502	438.392	415.409	415.122	437.149	485.799	460.959	466.255	413.418	500.021	456.126
12.131_333.16059	3145.82	36335.2	1661.49	78377.4	2197.16	1616.62	57237.2	1558.78	32243.4	92923.4	38372.2	25020.3	15249.8	1143.77	1398.99	29884	50266.3	1583.95	24764.2	836.723	779.347	946.529	248544	15628	2267.91	14979.8	38963.8	46102.6	1.07915e+06	142295
11.104_225.20911	34033.7	42111.3	33312.1	169153	28831.2	185659	37393.3	127654	127670	48247.1	38767.3	132442	154539	192092	45362.8	29805.4	35766.5	69199.2	2714.87	570.163	12917.4	1154.56	34838.6	8910.66	132775	23781.7	4247.96	19523.5	57205.3	17918.6
11.996_299.28209	26334.5	476510	97320.7	12935.6	221144	222840	62974.3	42879.7	119613	65061.9	42826.3	56621.7	153644	781425	1323.62	67882.2	8922.12	1021.4	55883	43011.2	13842.9	93238.1	403323	246025	925.148	64191.9	158467	162393	488567	286475
13.634_331.14495	12280.1	44650.6	27714.2	30368.4	807.433	346920	38720.3	362328	968.219	88060.6	14477.2	34040.7	11777	1284.61	1169.26	35623.8	37151.5	137543	8262.58	854.539	1035.49	1006.84	75122.6	2072.66	8957.49	2054.81	1244.85	7503.51	14390.9	13636
14.3_303.15008	197172	187044	207930	136518	28161.2	338252	127078	68921.7	37537.9	89306.6	17616.9	298496	872228	751727	17720	419038	67043.7	127607	54137.4	988.47	5549.77	1289.99	50032	23725.9	126994	4205.68	1229.45	26039.3	15524	46734.3
13.833_293.16572	76183.3	270141	302036	361142	58058.8	13993.8	91754.5	37950.1	99981.2	227333	118781	480540	295944	175191	28079	320456	117173	1.0218e+06	306870	2018.57	11647.2	2200.11	117711	69008.8	251234	145273	4450.33	81334.1	139088	67695.9
6.848_179.09459	540.534	657.565	480.54	668.663	571.784	668.654	470.938	503.055	1242.37	444.844	434.469	547.783	571.831	349.29	440.755	593.567	438.862	655.697	398.97	374.756	400.995	439.683	515.942	806.761	560.995	602.84	664.293	376.755	614.789	1120.58
8.785_272.15972	482636	118165	117219	136206	207175	159569	144847	114275	238746	144143	404092	96150.2	678555	225802	170740	312726	195118	363919	216232	224476	445691	274256	570689	487757	433787	287131	615825	554793	1.01376e+06	966988
15.635_507.3324	886.844	1007.69	1112.83	2339.73	1157.11	1197.7	980.729	1512.14	1348.8	1037.3	1469.45	1162.03	1076.71	1212.55	1234.28	2263.22	1617.21	1650.27	1914.38	2423.42	1876.03	1106.15	2956.28	4004.32	1399.53	4619.71	2462.5	2395.85	1405.51	2606.24
14.737_397.31882	12471.7	14033	58511.8	70443.9	13120.4	38932	32187.7	31125.6	12248.3	19986.5	37056	28721.3	30779.7	35651.9	19259	143253	138178	192493	28543.8	31032	40933.9	66433.3	76602.3	9011.34	112251	172079	47253.4	108605	128532	130081
12.965_139.03028	75899.1	706298	383961	565866	4184.4	133003	735767	830101	64093.9	832273	499779	327815	521581	42562.2	41136.9	581504	615233	588790	64371	2578.1	2820.74	3186.02	726753	245519	651148	47369.9	5006.45	564946	407784	632201
11.088_289.1345	782.146	64717.7	34138	4978.16	594.198	60299.7	29077.5	187652	3937.59	37073.2	4797.16	19509.5	10998.6	2135.69	3718.27	6816.38	21513	69289.5	11733.8	629.442	575.294	631.837	49536.1	17450.1	215136	8092.06	690.256	10671	160013	24889.2
12.1_337.15553	228730	106693	468163	320831	164029	2625	287353	2632.54	44409.6	1636.49	490425	474420	3309.76	2723.09	674622	251804	168484	3524.6	334886	1569.63	8822.35	5611.56	976367	152348	2306.21	63735.3	130379	274283	365563	163191
0.948_131.09462	36632.7	29501.8	23722	498562	39013.9	19254.7	10489.5	19441.4	953602	19299.5	29846	122584	39114.1	20981.8	30655	3000.52	2490.37	4628.28	4129.17	1580.57	9879.38	7087.62	4885.69	5793	42278.3	7023.82	1874.76	4131.25	4915.54	1576.85
1.184_117.05785	4399.54	5297.39	4138.85	17892	2822.62	8001.39	3577.25	2493.24	946837	3854.78	2234.88	1805.65	2129.36	2073.99	2191.77	1739.98	2020.69	1941.83	1694.97	2043.69	1905.2	1900.33	2819.5	2382.96	5677.47	2001.83	2405.56	2189.3	2630.05	2361.89
10.913_418.21143	881.133	706.059	694.99	1056.62	897.017	1099.11	948.53	905.636	944936	2001.31	880.272	1528.41	1408.63	905.734	1259.85	864.552	802.668	1036.36	731.913	743.328	763.462	667.964	1265.45	1083.37	1038.67	1120.74	823.341	882.095	809.463	1659.32
12.116_345.1606	18755.6	16954	20741.5	17837.3	17780.4	154360	14755.8	339128	19241.7	24909.2	15965.5	19646.6	30856.7	32150.7	18098.2	25035.1	20699.3	42605.5	21048.1	25428.9	21619.6	23770.7	58516.1	42703.3	519376	35159	29652.2	29921.7	37796.1	35286.1
1.081_157.11023	38035.3	50864	24697.3	294988	33400.7	18772.3	34330.3	41924.1	35857.9	34597.9	5977.48	101274	36899.2	27965.4	25152.9	4599.44	11919.7	14075.8	8041.29	5792.56	99870.8	25154.7	17494.3	148327	248.291	64573.9	23405.5	55325.2	107885	18429.8
13.528_258.12053	94504.8	139419	87536.8	300506	145513	225073	248591	142642	67666.9	408606	70420	129832	218357	310138	77943.4	274675	109611	191587	72938.2	4119.81	109460	93245.1	190820	331032	98132.4	258858	95749.5	52535.4	123250	391469
9.722_286.18889	5951.37	11376.7	73120.7	16248.9	9713.35	45782.7	16505.3	18201.5	1716.28	127010	7746.63	63761.1	83833.5	63156.5	23976	42239.3	15283.7	61706	3955.72	15940.7	9518.72	1714.94	16149.8	21068.9	25842.6	27816.6	1310.26	3982.86	3200.16	27039.8
0.73_283.96479	102309	139470	119540	382836	89458.7	230162	111178	162446	928150	145029	111946	91246.6	144575	175937	105186	109534	80430.6	224093	27596.7	14825.7	56272.5	17464	247778	129929	466754	77357.4	47903.9	79531.1	160905	102413
10.199_240.21999	569.913	523.45	428.848	48984.6	419.382	606.909	460.734	3724.72	991.953	455.232	412.575	435.601	538.518	1120.7	391.789	558.76	461.904	453.668	478.104	415.548	431.623	431.387	483.256	488.266	533.186	568.403	468.506	482.603	455.894	549.455
5.459_145.05274	1410.2	1352.22	1551.07	6925.57	1694.52	3997.04	1059.63	1858.8	901292	1865.23	1208.91	2083.97	1271.38	617.002	361.247	367.954	796.61	716.685	923.095	1051.27	365.521	1046.04	2421.42	1687.75	1542.57	1646.47	1346.69	1130.56	2183.13	1183.48
12.208_303.1501	1701.58	383162	2167.95	898602	3283.07	30697.3	592901	58106.3	624161	666023	1782.8	1738.11	385984	818125	4824.22	331305	696719	35082.7	1870.13	1582.64	1557.91	1664.38	835415	51653.7	147029	2501.68	2160.49	484639	454963	678100
12.505_249.17023	112240	45539.5	114026	59513.5	114454	41771.9	103737	50083.5	101654	59917.1	124917	167889	37175.9	54004.2	134681	53231.2	65925.2	49023	180407	138475	94372.9	100378	102574	155177	17529.2	208048	176325	220539	71790.8	97303.6
11.787_289.13449	1553.43	107518	42849.4	5169.51	1021.37	11554.4	38750.3	540869	126049	235463	23295.5	12013.6	348200	175612	10153.7	70597	5977.77	574509	33646.5	1020.6	1108.19	1634.73	115553	22148.3	177972	4685.37	2092.33	30751.1	51583.5	21824
11.547_333.16059	1059.22	702.358	1733.16	1154.43	710.478	1818.11	1017.35	1329.08	952.254	1182.41	630.718	856.125	903.252	734.157	639.177	948.749	711.649	1222.04	703.357	679.039	638.707	661.366	1375.62	1123.11	2455.38	1016.56	1954.27	873.327	2436.28	933.297
27.272_296.98357	31582.3	78220.6	56710.1	45094.8	61461.3	874420	312098	414116	732144	492834	367611	142233	249258	344838	145396	49469.4	93527.8	36552	57197.7	89509.2	33007.7	35893.7	55298	56531.6	79076.4	37033.1	67321.9	61054.9	45097.9	65604.8
11.201_333.16058	805.973	758.848	703.249	1231.16	713.511	1805.56	750.256	1789.56	927.671	716.943	729.216	732.559	761.056	778.478	684.091	857.402	907.43	932.529	828.59	708.667	741.176	695.536	963.669	1068.8	342251	990.27	1079.23	794.962	1205.85	1033.34
1.067_152.03339	182008	233114	164127	74771.2	77211	296515	153490	246960	27685.4	79785.7	420651	78383.9	311823	142779	254483	112012	64204.3	72336	224285	19641.5	215952	186474	260311	190393	114935	107234	85059.5	139138	104700	80234.3
14.476_303.15009	399993	140408	213290	121611	35583.5	2714.19	109294	6396.51	115195	201125	21708.2	298496	872228	751727	16391.2	419038	99891.7	127607	93221.7	679.808	5549.77	6302.58	28846.1	51950	8286.54	20011.4	2828.85	51616.8	5341.09	70995.2
1.842_197.00013	96783.6	111424	138849	95539	130996	117430	20329.5	58138.8	2820.88	77493.5	118300	39032.2	84043.9	46246.6	61344.8	63399.7	77288.3	28759.8	68019.9	55021.7	112242	14456.2	89593.8	130826	63488.9	96795.9	98449.2	56477.1	164223	171128
11.673_642.32218	2357.19	2038.66	1886.64	2114.41	2057.33	183008	2378.62	13319.5	2684.15	7721.3	2026.41	1937.52	2885.13	2456.48	1914.73	2842.09	2731.86	4200.56	2304.42	2092.45	2182.46	2084.67	2852.36	2910.4	861628	2936.31	2406.31	2589.39	3156.85	2837.44
0.961_221.0897	50698.2	114374	57919.9	138271	47423.7	58020.1	35081.5	81835.9	854556	53906	54494.4	54123.5	58378	47207.7	109159	21816.1	24421	80524	23408.7	23379.5	34247.6	36351.6	126429	141092	65972.8	84086.8	117682	50396.1	104779	38190
12.157_498.25021	572.319	550.196	530.796	742.656	460.426	743.252	623.726	825.894	710.641	868.246	452.135	481.464	942.439	785.7	495.53	667.634	617.059	837.237	2529.95	475.048	490.228	559.805	903.15	647.132	1588.29	7471.76	642.29	771.009	848.298	793.531
10.543_166.98634	460.397	415.862	349.439	399.266	377.885	448.531	374.149	424.78	460.179	364.57	347.584	338.892	396.951	359.578	335.494	448.475	406.076	365.218	398.397	367.184	360.346	353.317	429.05	578.066	499.041	422.8	402.165	390.455	443.589	460.035
10.561_164.9706	1108.33	981.851	846.009	961.164	909.695	1079.76	900.7	1022.59	1107.8	872.181	836.75	815.826	955.591	865.624	807.645	1079.63	977.558	982.633	926.376	831.586	867.473	850.552	1032.87	1391.59	1205.44	1086.97	968.145	1006.74	1067.86	1107.46
14.422_436.18574	287618	82650	148977	57799	68430.8	49130.5	111584	150421	828473	57858.5	65616.4	62630.9	74414.4	46385.5	63751.4	314732	71294	40421.3	185545	59896	58234.9	53806.7	117138	104791	49208.9	80576	78585	59153.3	57106	92013.8
5.41_143.07347	1164.13	1036	1161.29	4366.48	1082.32	1534.63	864.079	981.375	822495	1062.08	842.001	1066.55	725.921	770.256	744.09	744.76	720.922	696.453	731.318	685.345	704.544	729.679	738.689	774.851	734.053	743.728	1013.38	789.109	729.063	838.298
1.41_155.97357	254720	122203	175069	162171	102873	109530	14152.7	50385.4	23218.5	48166.2	95021.2	40871	161811	19344.5	45839.2	94326.3	150042	41292.1	35801.5	87235.8	117619	56228.2	85147.7	160835	111178	73146.4	129572	73147	179801	81176.8
1.14_220.08476	8446.51	8366.58	6986.27	14393.7	7739.18	13563.9	25162.3	17495.3	815083	6118.82	8098.32	5740.93	7045.74	7308.96	8013.88	6392.84	6409.27	5366.91	4839.68	4895.29	6250.7	3770.56	6264.57	7276.74	3793.36	5447.66	6244.05	5269.7	5630.3	6407.96
13.437_355.11272	2145.2	29820.2	4494.26	15677	2432.28	803704	42558.5	274575	2486.84	34341.8	3786.84	63514.1	7166.45	55042.7	2588.76	82113.1	3796.82	66014.4	3685.29	2064.42	2336.86	2134.27	52749.2	2750.6	73934.2	13802.5	2695.46	7354.94	3964.24	5415.15
0.956_243.07166	44413.4	102546	52710.5	119098	42502.2	53451.7	32655.1	73342.9	801622	50661.2	51071.8	36839.2	53974.2	42344.4	101078	20452.9	22883.5	75135.1	21775.7	21367.8	31362.8	34242.2	115894	132825	62228	79376.4	110701	47196.5	96861.1	35535.6
14.765_495.35593	365.228	411.756	312.239	330.794	323.978	711.701	357.696	408.899	333.456	325.163	409.844	299.853	325.73	354.546	310.894	553.286	354.148	556.118	400.623	372.858	324.786	440.148	548.106	427.226	501.008	576.567	348.937	631.172	618.366	392.988
9.936_308.2195	317559	69932.8	56835.2	76302.6	136181	80924.2	69998.4	59524.7	684991	71018.2	270252	60187.5	622221	100253	116265	218264	96535.3	412228	139468	179383	266034	187079	264666	397227	304080	166781	302668	342968	706052	675742
5.775_268.08794	8364.19	2763.5	3619.65	2736.86	2663.29	4369.99	3867.45	3030.97	3087.31	2677.99	2009.49	2649.61	3043.61	8733.39	2617.32	11117	10196.5	6139.59	2828.28	3248.73	2610.27	2434.81	1935.31	2100.2	2382.65	2405.23	2492.6	2775.66	2643.21	2929.22
12.449_606.30113	2618.56	12557.3	3146.13	17831.9	2092.56	312071	4134.3	796215	2781.59	5357.61	3746.91	3545.52	43641.2	7697.45	2103.79	3322.15	6826.56	279500	2403.17	2222.57	2090.15	2176.38	3748.43	3204.39	706149	2816.47	2663.05	6329.57	3527.35	3566.91
11.101_337.15544	661.598	618.175	548.358	3817.35	502.617	636.787	1004.12	809.375	1522.51	533.762	514.39	491.482	523.912	784.942	475.043	689.798	550.197	621.823	560.216	532.429	530.481	502.425	880.311	853.359	198071	664.252	583.87	628.471	679.221	1047.1
12.963_339.08128	782568	71901.4	184818	68632.2	76987.6	7228.35	257377	4191.64	291916	79370.3	19412.4	137927	578580	381469	56666.8	384285	52758.4	2586.59	22948.4	1608.65	1760.05	1509.57	2443.85	104730	2319.42	12005.5	2721.42	104350	2594.65	91778
11.857_321.09827	1525.95	2520.78	10177.9	58235	952.765	307614	1782.03	189533	3504.61	97849.9	8485.24	10497.6	779089	114838	933.845	4022.92	2401.94	166446	3966.47	1148.2	1035.58	1112.28	4593	2151.49	5017.76	1761.3	1115.38	3452.86	6351.82	1704.78
2.696_204.05667	149962	215600	125225	1913.89	37233	269387	168378	131946	1444.25	203607	12488.2	13649.7	109002	637258	72204.9	777513	274927	59938.6	244306	79615.1	3661.03	103337	47264.6	48738.2	1279.43	53067.8	69657	111057	40662.2	158207
15.216_493.31679	7843.49	7251.42	4800.68	5373.64	2166.28	1464.4	2380.21	4653.35	18126.5	1792.2	1584.8	4887.52	3412.9	2009.58	2977.94	4256.14	10251.9	1992.54	11776	5025.19	8796.58	7460.01	3721.23	12937.7	5563.81	9197.19	5060.42	8716.62	5840.67	4996.01
13.742_361.12959	55172.4	242773	261144	297908	27114.8	125572	317180	509905	87113.8	252626	203171	416835	418018	388910	30366.5	433283	152922	603151	224995	1499.87	5207.47	1737.94	291644	69432.8	306615	196901	9471.85	50586.6	183617	138156
6.489_244.17846	1874.63	21928.9	11131.5	9253.28	4346.53	366193	3082.55	210269	31392.7	27775.7	3702.95	17367.6	118052	69210.7	2393.44	3513.87	5375.25	138887	1130.55	830.417	1076.22	844.175	2795.64	933.977	55501.7	1767.92	860.425	1261.84	11188.6	1634.64
9.14_148.01601	7235.1	8859.66	7412.1	9120.81	12933.6	4314.06	7069.65	8384.19	46332.9	6498.68	8292.23	5207.9	7557.16	5591.22	10414.3	8349.09	6823.31	6672.76	23767	10446.2	12358.3	5961.98	32892.7	28469.4	19486.3	21942.6	15498.4	18566.4	8005.02	23131.2
12.172_262.11788	1473.69	2658.75	795.104	2960.21	1570.67	1230.52	3549.47	34935.4	710.796	3181.43	1758.18	1660.6	1942.09	1743.5	731.09	3508.57	674.766	1034.19	3085.25	475.152	684.729	1170.24	2415.24	2967.36	1588.64	32742.1	642.431	771.178	6267.75	17949.6
16.032_545.34861	2181.11	1486.02	1205.29	3112.76	1334.89	866.99	1434.08	3203.58	1202.07	1263.78	3502.26	2355.76	2924.79	1283.84	1763.4	2302.03	2461.72	777.945	3358.54	1653.77	4265.51	1554.2	3664.23	6509.35	1556.08	7476.01	2588.63	3309.87	3712.44	3948.9
12.712_379.14011	2268.73	16362.6	42917.4	42376.3	1609.66	59524.7	52319.3	56462	8087.13	51326.8	10427.1	3660.12	2862.44	2336.52	1659.24	18849.8	38217	254060	1969.79	1560.39	1566.75	1394.76	433194	2334.58	137707	3248.84	5888.22	9978.6	760695	158590
11.35_225.20914	663.303	707.423	10744.5	4647.34	447.342	185659	1267.56	13976.2	1901.52	17093.9	944.492	1852.7	12511.9	8226.27	417.548	768.435	559.041	5055.87	519.278	451.148	451.205	435.042	1394.09	935.338	132775	619.642	501.451	631.667	1482.26	5209.85
9.617_308.17082	2090.54	12871.9	29727.4	6715.51	7762.57	15609.5	23270	9733.36	1280.78	105186	3002.42	28201.8	36948.5	26784.1	9177.13	50232.2	21598.6	31033.2	1607.92	17886.3	1893.72	614.67	2162.6	1594.05	1294.23	35817.4	888.548	4296.98	417.181	7574.41
12.911_279.15016	5419.72	17295.5	23026.6	45840.7	3804.74	11862.3	13779.2	4650.39	15213.8	53652.9	4111.79	159038	92683.5	18971	4927.61	112358	14733.3	10065.3	16020.6	3025.09	3252.3	2789.45	5314.03	24765.6	5812.84	18108.6	3901.18	15401.9	5151.73	25382.2
12.496_227.18834	130774	41531.8	86649.9	50426.1	140045	37397.4	81625.9	104713	111090	63728.5	59008.4	115952	11578.5	128659	59997	92261.4	61753.5	8173.45	101673	45341.6	61402.4	55275.8	118012	177541	8939.6	54467.9	32327.3	33037.1	11429.2	170961
14.73_579.26325	76676.5	38519.8	30537	72699.8	64941.3	77563.3	35485.4	53664.6	15587.6	33388.5	69783.9	34512.4	57911.9	34826.3	44522.2	122770	67451.6	23618.4	102814	105333	188485	86034.3	179549	170308	40008.2	73753.4	116319	80864.7	97224.8	154073
7.28_278.16274	4634.15	16309.4	8038.41	175738	2373.28	331124	11856.5	224140	122957	148294	4623.48	14720.5	159276	213765	9187.85	35100.3	4674.48	194287	614.153	553.23	505.961	930.315	89239.1	935.616	1722.76	12570.3	1949.98	2589.16	6949.34	3615.98
0.824_161.10516	13880.6	49684	18668.4	630770	11596.4	40205	24236.4	37692.5	108614	19783.9	13325.3	98911.2	26292.8	19006.8	11261.2	14908.5	26200.5	24115.5	7135.14	6422.09	12725.9	8134.55	28083.5	6717.91	92427.6	17039	7271.17	17538.2	20484.5	28832.1
11.458_333.16055	502.003	1049.29	570.01	1537.24	388.566	10346.3	479.148	2029.03	711.304	703.118	383.194	953.56	621.644	449.029	376.901	475.891	676.481	968.934	516.714	426.099	399.51	390.426	626.748	463.786	734185	569.164	480.423	544.106	5871.26	738.797
1.114_334.0211	27842.2	9640.26	9566.22	27149.8	7930.48	16681.4	7880.94	21228.8	24787.8	10620.6	23669.9	6387.68	25928.7	22165.9	32577.5	21926	12835.5	8461.91	141351	45947	151939	4994.95	176475	427623	10212.9	9089.51	222065	11230.5	190094	104628
12.011_642.32219	5619.69	4293.33	5768.84	4291.99	4318.47	231128	4319.24	252369	6495.39	243367	4821.52	5974.99	36948.1	206532	5193.23	5452.64	6250.66	231784	5600.99	5382.64	5663.05	4379.39	19916.3	8729.56	117784	6433.56	4588.38	7628.12	9573.83	6930.01
11.453_537.25827	860.196	956.851	13319.4	796.558	778.614	1119.96	3411.34	1498.4	762.746	807.595	1026.73	713.84	5387.77	92963.7	1490.79	1052.79	793.579	876.376	737.924	770.205	720.366	669.006	934.941	951.08	1566.15	975.278	836.477	831.61	863.235	951.559
12.695_287.28218	14769.9	20177.5	12127.4	309996	16791.5	242335	32073.8	178055	26585.5	267018	19222.5	283046	174102	228781	13327	199222	17135	165858	19170.9	18930.7	20804.3	11181.7	196689	22072.5	236434	32552.9	23814.7	17745.6	365138	139433
11.858_315.08131	3195.53	7702.99	14799.7	70275.6	2452.46	170934	7938.42	149177	13801.3	85112.3	5610.1	15664.9	715047	98220.5	3204.39	8058.56	3394.27	194555	3914.73	2955.51	2805.82	2863.06	4189.43	3853.9	89044.5	4008.02	2871.05	4438.74	5987.38	3941.23
12.432_345.16053	1198.81	39150.3	1061.21	2134.44	1332.18	68483.8	1850.47	240022	1391.47	351224	1076.11	1507.73	13802.3	33754.1	1176.24	1511.23	1973.63	151868	1134.54	1111.83	1441.42	2522.95	43687.2	1885.9	26998.1	1458.73	1682.52	1807.38	54916.5	1669.38
11.676_277.13453	656.8	8957.46	5768.79	5094.18	573.754	614654	6061.57	16089.4	5198.42	11218.7	3088.18	3950.33	710819	28679.2	1219.67	5663.25	6618.52	6631.66	1072.24	602.397	560.464	600.158	4786	9272	1922.59	1214.06	693.413	2365.25	3083.18	4179.79
5.376_244.17845	22608.1	64268.2	27401.7	78468.4	12365.3	176218	48855.6	75399.3	55460.3	69948.8	14624.4	82873.4	57068.7	86846.4	19023.2	8840	13198	54682.7	2856.92	2762.55	2752.39	2720.49	33770.4	7030.67	2873.67	24136.6	3111.65	3182.9	30947.1	5145.96
5.259_251.10162	26146.7	32865.9	11734.1	43287.6	30334.2	2034.32	18678.5	11371.3	12453.4	15248.3	10420.6	10591.2	4936.65	6002.78	14907.7	17891.6	11602	3461.13	14417.2	14800.2	18099.1	13205.6	17296	50205.7	36411.9	12927.2	8553.46	63472.3	8439.57	27634.5
11.276_339.24052	55702.9	15672.7	29179	219208	67576.4	97095.3	18141.1	148810	41908.7	147701	7252.41	91003.8	153587	56908.3	9032.17	342966	160794	324068	61909.6	454.551	19136	243077	198686	68270.6	340100	84005.5	13911.2	8476.2	95142.4	643313
11.938_375.10247	66675	42678.7	230107	117563	29468.2	1605.86	184980	1662.85	703558	375000	264886	240712	126772	329732	212989	179845	32394.4	244895	90603.4	1092.4	5213.81	3583.87	499535	34430.8	1566.77	19440.4	31528	165163	259354	126315
14.379_361.12962	31952.2	98914.5	134970	106723	23018.1	586240	121490	702867	30327.1	237720	267961	368539	29973	23559.9	27809	336789	265539	309959	45000.3	1584.7	7906.5	1587.05	249292	16924.6	337357	37097.1	1971.03	33543.3	175121	45407.1
15.434_224.14112	3091.17	5472	3953.49	26467.3	4387.18	10616.5	8243.66	70832.8	1060.81	12287.1	5418.21	4897.73	13338.9	9523	1281.83	8686.44	1067.32	4595.04	8269.53	391.967	970.57	4088.74	11094.8	19062	2872.16	36469.2	1950.07	1186.62	8729.63	33139
12.506_303.1501	368711	383162	227389	50812.9	30663.8	215384	549291	65403	624161	316035	264092	332600	191975	207993	14782.5	455448	695270	44003.3	28077.6	1922.74	1808.18	2052.07	19901.5	432996	114315	245312	6150.36	484639	265772	678100
6.208_129.15174	209414	226950	241527	184204	168306	189451	159337	243858	509705	240660	247875	167054	155737	231630	186054	543031	263144	291051	183337	120793	105116	164288	682587	235291	141083	247546	188071	254463	237071	256638
11.541_375.10246	1539.95	1241.33	1235.33	1422.47	1390.43	680385	1469.93	151465	2980.34	152872	1234.34	1274.76	126772	116510	1657.44	1856.74	1417.15	137709	1505.48	1328.9	1249.97	1294.32	7889.73	1642.26	106980	1796.04	1572.04	1617.59	1836.78	1739.29
2.738_126.04294	13565.8	13739.6	10676.2	8838.59	9937.2	11742.2	10256.9	9202.01	7483.3	1082.16	9279.47	4822.62	2191.73	10660	8267.4	12018.3	9414.31	9412.14	977.924	9426.41	9913.77	6631.18	11391.9	9996.57	6770.06	10170.7	7873.77	8084.46	6720.9	8112.31
11.573_277.13451	678.929	8957.46	4437.65	10390.1	688.247	677982	9847.96	33307.3	5290.99	15475.9	3088.18	3283.3	9303.15	28608.4	3313.7	6875.06	6618.51	5036.66	1871.17	585.883	551.084	570.635	12238.2	2027.11	2030.79	1545.89	693.077	9505.23	5578.73	9864.95
1.119_230.1629	51124.9	129718	61318.2	159999	29095.2	361041	71548.6	235182	242425	93895.3	21858.3	56431.9	204957	148318	54811.4	4888.64	10108.5	120667	791.45	486.537	2926.19	779.471	28858.2	2591.76	37371.8	34174.7	2502.56	677.214	31973.3	2010.83
14.243_371.3032	10621.6	8394.46	25690	43370.9	5580.98	18713.8	14565.2	23226.8	9647.89	14819.9	34921	26309.5	31710.4	18480.5	16954.1	101659	181722	200928	35993.7	20470.5	20627.4	53672.7	93679.8	5852.12	86399.7	117945	40094.3	52399.7	58229.6	54531.5
15.738_543.33276	4105.18	2390.74	2690.05	9091.49	4227.98	1781.37	3158.31	3001.25	2762.91	1275.61	4315.97	3230.1	4697.6	1950.56	3194.92	4173.19	4063.29	1594.4	5562.81	3058.04	6893.09	4577.6	11441.1	14595.8	5354.94	3571.49	6791.16	3273.23	10878.6	7204.48
9.916_440.19439	713.018	3131.11	704.164	28141.8	566.522	8999.65	8782.39	30402.8	18064.6	2311.7	10784.2	3032.42	3099.27	6017.85	518.164	5629.38	5490.07	3605.55	2571.87	547.731	539.547	506.792	1361.89	5881.8	10777.8	110328	927.41	3560.87	10683.6	10031.4
17.266_148.01599	314256	391879	399233	344176	256276	262723	214765	399724	135754	222146	214161	262384	299483	217822	220355	492636	261873	244305	301783	307914	374242	408505	512486	611733	347181	76558.8	347945	443913	466205	478410
0.739_299.93868	114999	104845	86606.4	299876	66213.9	211976	101628	185040	241079	117721	54783.8	117160	181447	153912	67981	57791.6	38786.3	133816	7905.24	3542.66	22919.2	3613.57	81890.4	55643.5	400805	34018.9	11159.1	48134.4	86364.8	49564.5
16.877_547.36381	1670.01	1251.18	1651.16	3995.2	2096.84	900.787	786.795	3867.97	1314.22	1063.46	3500.36	1599.7	3657.58	968.776	2941.51	2806.37	1809.16	746.926	2871.51	2057.46	4138.43	1336.83	3824.69	6854.32	752.187	5484.59	3207.9	2638.06	4101.5	3340.12
11.489_277.13452	911.175	1427.69	446.677	6751.58	430.034	125150	3752.87	13864.2	5914.76	7338.31	617.34	1437.67	14218	3547.43	1563.18	4293.07	2641.66	4932.43	930.148	403.257	378.094	354.88	5054.21	2544.29	433257	1545.89	1157.37	8628.67	4711.65	2489.52
16.288_569.3482	2848.23	1158.23	919.31	5231.05	1120.22	1903.52	731.698	4183.32	504.726	828.476	1625.68	1120.76	2228.81	662.385	1561.48	3069.02	2189.72	1059.53	1283.17	1143.68	2942.79	1095.42	4450.26	8765.99	1168.37	3228.79	3925.76	1691.91	3359.85	2955.26
16.247_495.3323	117916	73100.9	73820.9	161980	89727.3	37125.7	63632.9	67494.8	95132.8	82548.1	59618.4	70510.6	67762	52615.3	125377	88047	140587	62530	81307.6	87617.4	126911	98910.2	108734	186506	39821.6	84786.4	131514	107378	107326	125512
12.739_321.09824	93380.8	417909	159872	360830	1046.34	1630.42	139012	1883.28	240235	226273	16561.3	383752	248716	19413.6	2172.93	568629	323553	1737.94	1711.47	1112.17	16289.6	4493.9	46056.2	157020	2137.09	5161.23	3078.98	453051	18002.3	213594
5.509_156.0762	59490.4	88630.3	52583.2	81337.6	84911.4	65546.7	51483.4	48860.1	82715.4	47279.8	31795.4	50376	80045.8	93557.4	79070.8	192846	61135.3	75013	49270.9	100294	82491.7	133520	641967	384252	12900.7	346132	210363	202608	185610	346091
12.571_345.09821	90562.3	162918	70255.1	77493	2463.37	390130	12138.9	32270.5	1954.14	271101	2090.62	6060.13	406690	451073	1556.18	21885.8	11171.1	253602	4172.19	1330.17	1305.13	1535.34	29622.8	5178.36	3380.97	4276.81	1676.87	2763.47	9120.46	20950.9
11.41_275.11887	3458.29	13794.5	951.952	23418.8	4731.92	116793	6138.07	18996.8	4961.76	19458.5	1734.95	27147.7	76800.1	8440.55	5521.84	155880	5957.17	22074.2	11135.4	638.342	612.355	838.616	2218.48	21282	254299	10445	682.278	8389.86	3518.67	17622.1
8.889_391.24675	1083.2	12111.4	531.495	10541.5	441.977	46595.9	2718.8	39196.6	3111.82	6952.58	2312.08	8690.76	21925.9	21031.9	3338.36	44632.1	5793.57	33801	462.38	2622.41	2019.77	418.585	9402.81	18557.1	9962.95	55879.4	4012.07	6236.96	18832.2	3802.09
11.789_333.16055	434.771	1165.16	2844.8	23099.8	383.624	117079	524.99	150783	601.866	47962.5	584.802	913.954	20774.3	1420.18	367.21	503.91	3697.92	242688	416.808	372.136	446.843	389.107	197137	602.066	1204.6	601.189	455.598	496.562	11490	952.744
13.5_337.12961	2673.57	13378.1	3924.47	21675.4	3031.37	621241	3935.53	168416	3099.36	9832.52	3359.63	15090.9	4774.13	9797.4	3226.38	18249.8	3378.51	295323	8675.45	2647.45	2912.45	2740.83	3191.94	3200.93	7970.92	3579.17	3388.76	7049.53	9358.08	5380.93
5.969_156.0762	83635.8	61540.4	22443.7	88216.7	65673.8	48802.1	13019.4	12013.9	83178.7	19961.8	11956.1	38486.6	10658.9	11729.7	12365.2	35882.9	71844.5	69093.6	37947.4	22400.4	82204.5	105583	620523	82033.8	474443	88589.4	245927	28949.7	100794	310152
9.927_330.20143	241071	52052.1	43137.4	57537.7	104222	62297.6	53273.8	44696	537783	53205	207427	46021.7	472859	72713.8	89162.6	169062	72392.5	314572	107159	137392	202723	143828	204546	303763	232702	129617	230099	263669	535711	516608
8.885_280.08785	15189.9	6080.15	5467.27	8514.44	4307.62	28436.3	4510.51	10890.6	79206.3	17439.2	3037.38	10796.9	8457.69	50783.9	4463.99	60114.7	16337.3	15538.6	28387	532.863	1999.48	1727.68	56988.5	47646.2	76255.1	16272.8	14000.5	30411.6	54175.3	81233.7
6.622_244.17845	29175.3	77518.9	41109.5	96692.2	8822.02	32728.1	41320.1	122729	279037	76472.5	13198.9	56544.1	100006	151514	26786.1	14580.3	18810.2	96616.6	1072.67	705.545	2483.61	581.879	50910.3	9923.65	53529.3	28741.7	4528.03	6837.58	41272.9	11938.3
7.14_314.12728	882.411	394.764	417.063	354.639	430.975	869.457	303.887	479.041	1124.37	278.56	396.594	391.858	300.191	1719.4	283.898	1107.61	336.195	275.829	522.947	408.479	308.036	279.691	284.476	1071.19	308.453	603.856	741.339	716.488	292.181	295.281
11.627_381.1194	1011.26	825.938	792.5	995.279	933.535	602599	872.513	139730	100761	105972	869.351	958.793	119179	383272	821.438	11574.5	1043.61	169853	988.623	897.682	820.834	894.346	143820	1248.59	1796.74	1179.43	1006.35	1214.13	1116.07	1142.16
14.904_341.16564	33071.6	140670	77690.6	341976	213817	97165.1	86029.1	298697	35389.3	124229	37860.4	121765	26757.3	25089	3415.12	53837.3	74936.6	213498	13020.8	1234.11	3851.59	1393.37	133691	37781.3	93219.2	54397.6	5445.5	22663.5	67549	37761
14.973_481.31662	496.027	607.898	456.471	515.911	419.015	488.455	533.935	415.168	437.175	478.88	500.192	450.72	459.498	504.574	471.919	393.732	557.548	546.595	551.972	414.403	365.39	408.167	625.02	405.785	616.641	447.547	658.167	795.954	461.683	1723.7
6.426_275.04693	2163.18	2879.97	1761.14	3292.36	1634.74	1927.48	1454.59	1884.76	2065.25	2249.25	3309	1473.19	1420.51	1391.34	1884.06	1727.92	1390.31	1362.9	2118.76	1403.12	1869.56	1355.62	1540.73	1403.06	1431.57	1928.59	1492.17	1378.21	1451.69	2112.3
9.813_440.19441	1882.88	4286.39	1455.64	52852.4	1275.35	17824.6	13125.6	43797.9	9765.87	3204.04	19840.8	3498.53	3172.22	4695.28	1271.86	5366.81	3467.02	2889.18	1813.04	1299.37	1317.99	1337.31	1602.99	3347.05	1713.94	105955	1485.22	2419.23	8020.96	6007.9
10.821_330.09224	1632.9	4284.63	3437.52	1421.76	9486.15	63555.3	1550.93	3552.78	1757.65	13826.2	1271.19	24249.3	56608.7	8505.66	1195.98	118901	2810.42	14232.2	30622.5	1270.81	1338.4	2711.25	2429.35	35197.1	6425.74	14542.9	1450.43	1447.6	2067.28	15072.2
12.17_222.12546	1986.37	3161.07	1895.85	6423.93	1720.74	4499.97	4799.16	67473.9	809.469	7838.86	2309.9	1717.7	7366.28	6590.68	665.378	3900.06	1011.01	4741.58	3738.86	655.24	551.889	1027.07	5875.06	1922.35	5287.64	27304.2	1701.72	2149.88	5196.71	13994.7
13.947_349.12956	82612.7	254523	105583	140093	22476.7	180873	115093	409202	80210.2	224113	92007	87836.7	162267	129301	19465.8	76670.3	158407	152172	7776.06	3131.39	2929.5	3535.78	160508	60455.9	336334	49905.7	9047.17	158316	158228	115375
7.378_310.09838	20876.2	36141.9	19159.6	19295.3	4229.61	140774	34954.5	40279.4	3198.3	76252.8	3808.12	3161.92	29600.6	171224	36605.2	100136	58718.4	17509.6	32834.8	2764.46	13386.7	9976.59	22364	15524.2	1051.93	8896.1	15985.4	12025.1	10673.3	38701.1
4.067_204.05669	145896	160003	65351.8	23886.9	32598.3	224627	132697	114336	1614.26	126872	12037.1	14119.1	104111	576766	47409.2	366073	140575	65453.4	114162	64102	114174	70505.5	44590.3	158286	8528.79	28292.1	49828.8	58138	26274.2	199557
10.268_418.21142	1015.55	988.792	857.605	1551.44	776.396	982.709	845.311	1115.17	576529	1109.41	1360.96	689.288	829.476	1034.63	1204.94	1179.22	1477.92	968.427	788.588	2247.37	864.171	844.983	876.775	1064.53	1440.92	1732.35	893.813	1041.61	1487.4	2109.45
6.761_244.17846	23661.2	76598.9	39962.3	105935	8537.19	231073	38718.7	122729	279037	68712.9	14914.1	51459.2	59595.5	151514	377.405	12524.9	13352.6	95810.7	403.403	404.754	2483.61	581.879	47350.4	9923.65	80596.5	21339.7	4528.03	6833.75	39609.4	9119.35
6.808_278.16276	16009.7	31770.7	15350.8	57334.5	4014.57	98461.6	27731.8	47475.7	373688	37410.4	9133.76	27954.7	18260	86567	19998	6313.85	11698.6	25934.3	1091.86	558.915	2177.21	968.805	15818.2	5817.35	11463.8	12901.6	1757.79	3168.58	19862.4	4197.09
6.034_297.08921	11159	11305.7	10997	63623.9	6932.94	8075.86	4992.99	10219.2	571922	4965.22	4812.53	11910.2	14073.9	4781.67	3182.78	7546.03	3123.73	3182.32	8449.16	5223.98	8091.7	4892.99	7461.47	11162.2	618.663	8046.83	5862.34	5553.67	3121.09	5399.27
14.126_303.15007	4933.28	19448.9	11866.1	7900.43	2419.99	293629	6212.97	128449	3827.37	58287.4	1593.87	181056	327414	236813	3028.01	164100	16084.7	106353	3177.1	5220.44	4978.43	6961.27	4544.3	12051.5	59029.9	9251.17	3926.33	17477.4	6442.6	7292.68
7.215_384.13516	393.541	432.229	350.004	327.627	308.732	331.721	309.007	319.312	432.543	310.831	285.424	306.696	289.609	311.458	302.917	331.617	312.438	287.764	297.13	268.939	283.733	302.056	288.363	304.779	294.12	316.986	300.761	309.252	265.655	304.159
12.562_321.09824	54191	417909	103979	360830	16687.9	2354.26	8383.36	2711.13	105623	226273	28097.6	93673.9	524418	435988	58574.5	568629	10979	115486	47511.6	1196.43	16289.6	5726.43	46056.2	58695.5	2382.56	41893.9	5214.88	453051	27425.8	58750.7
9.741_254.0577	911.731	3605.28	4270.38	154922	2703.14	23402.8	36053.6	96513.7	51457.4	667.262	252853	6930.74	3690.27	3195.43	453.848	3254.9	626.843	597.234	437.144	269.141	501.551	282.527	325.426	1018.22	784.174	74940.8	416.231	504.209	2160.56	2390.35
1.562_197.00015	141517	122953	181126	161158	174333	92756.7	64431.6	75913.9	3123.97	103794	101793	89455.8	84880.6	56507.8	77301.7	77470.6	121212	50286.8	62093.8	58300.7	158133	73089.8	100319	141725	139709	105380	113330	67157.6	192243	207445
14.472_421.31882	1769.29	1922.56	9942.53	9769.14	2834.19	7613.03	5334.35	11223.6	1868.29	1161.27	18877.7	5637.87	2803.88	1261.74	1040.18	20580.7	37747.3	17344.8	2326.02	3999.1	1968.32	8940.32	20994.4	920.604	26081	47421.5	6434.04	15725	15938	11112.2
6.4_295.12772	850.549	886.45	969.905	753.58	639.247	1326.66	741.207	898.385	733.889	749.467	589.648	591.596	1445.98	822.69	511.195	1566.91	556.504	1103.85	607.168	518.004	505.131	572.02	516.729	554.764	551.083	583.691	665.741	544.938	612.746	949.12
12.697_227.18834	3452.54	1020.51	663.896	2467.49	766.243	883.619	2105.09	129382	2148	12231	808.152	3348.36	1940.46	2487.19	1557.26	112971	1966.19	256153	1434.51	1157.31	545.556	1432.59	1288.57	1894.09	163223	2529.27	883.594	1702.88	758.427	1130.51
12.238_321.09825	51528.2	190610	89745.5	48711.8	7085.47	190442	113865	290641	109450	1768.6	37748.3	91301.9	231796	43320.2	37580.4	315823	56284.6	115486	18049.8	888.942	2578.31	1142.53	5843.81	50296	336545	27093.7	2135.9	82359.9	3387.38	51640.2
9.039_148.016	21278.4	19057.2	24954.3	21122.5	2830.03	20930.7	19095	21902.6	42838.3	4715.41	3786.58	3093.25	21569.7	21722.9	18178.1	5061.24	3502.54	3780.8	8297.56	3985.39	3968.97	3599.3	19745.8	4694.16	17810.9	12701.3	7146.64	10614.5	3974.91	9834.74
7.028_306.12459	1307.7	1191.29	1074.88	1319.74	1069.35	1138.83	978.258	1026.79	1483.46	1000.58	960.351	869.277	997.61	986.596	877.269	1020.2	919.527	1044.71	976.996	1248.88	943.49	871.463	955.021	1148.95	922.037	1123.64	969.413	973.288	961.679	979.208
6.099_245.16246	22408.8	34531.8	48758	43993.6	37686.9	154344	56035.9	59211.7	544304	106419	18605.3	64904.4	88615.8	87365.5	2442.2	42919.2	50810.1	4495.57	39200.7	5154.06	7435.07	4262.88	6297.9	11010	21420.4	17171.6	7452.02	8642.16	38016.7	22970.4
1.094_228.14725	11817.6	17888	7158.34	228211	4730.92	26481.5	13825.7	27872.2	540288	8053.62	5486.59	15457.1	16083.3	18760	7639.8	3076.36	3069.81	5395.65	1348.1	1106.36	4292.57	852.167	6277.54	8183.44	3916.05	8903.31	1411.19	3854.47	4281.8	2264.85
13.559_255.18325	1119.86	1649.65	2380.46	32074.2	2059.33	5312.28	1245.2	8039.99	1255.99	2242.55	1453.31	5795.49	4477.75	1439.37	754.793	2752.48	938.564	7018.92	2389.47	651.71	4535.64	3103.56	4184.21	3896.8	1045.61	5326.18	888.236	635.03	728.321	2769.39
13.54_359.17632	768.015	8191.32	22786	22002.5	4784.88	51365.4	43622.3	84200	7704.54	45994.1	335017	38650.8	794.951	1876.94	2560.14	16661.7	10153.9	225268	674.475	760.511	836.634	764.104	221656	8604.86	418188	8087.51	20970	41842	537638	47115.3
12.854_411.29806	12117.3	15700.2	15345.4	14489.4	9988.4	82007.8	24870.8	42264.1	22499.2	18262.5	5008.29	22519.7	58445.9	57573.7	965.363	64217.7	21404.4	37124	13736.9	6367.05	4539.62	6470.71	14264.1	11486.2	4384.42	15878.4	6166.04	19954.2	29026.6	51106.1
11.876_381.11938	44778.2	24930	46858.3	126910	2113.87	17301.3	163544	84371.9	471560	332142	67712.4	205881	119179	383272	92349	118227	25341.6	169853	51829.7	1268.09	3442.81	1228.43	304426	18149.1	1818.76	1542.65	5521.12	102032	172489	31825
11.524_319.14494	1496.25	1084.33	586.294	1626.88	690.984	180864	730.49	232562	39431	829.714	613.412	1279.76	95440.6	190942	621.639	1706.71	1176.68	173149	1162.21	647.959	619.085	607.504	2243.76	2609.69	451356	851.607	3081.12	5436.41	912.801	2572.74
4.38_136.0385	10638.7	43029.7	12634.8	47236.5	4034.15	16821.8	17938.2	46001.8	96291.4	35662.8	14223.3	7877.36	17512.6	26149.8	9694.03	19913.4	17550.8	5554.57	3622.96	2356.7	3061.34	3518.03	4397.28	22128.1	22495.9	6081.23	3554.31	20873.8	11660.4	22542.9
9.928_260.15224	18485.4	47055.4	13195.2	176377	6450.63	124083	21142.8	54277.5	10994.8	52026.1	17002.9	19131.3	84655.6	92201.7	18092.7	23136.2	14789.7	16078.7	1781.06	1036.57	11669.5	385.897	5107.76	18306.7	6609.68	15417.6	4128.59	7868.97	12974	7188.45
5.153_339.07433	26656.9	83629	17202	98471.1	16843.8	41125.5	45822.1	98932.2	70631.3	70214.1	24024.5	16355.7	40446.7	86250.8	33033.5	54560.1	38813.3	15286.3	9310.74	6037.02	10486.1	7454.62	9331.41	59836.9	41895.8	12493.4	7791.88	53488	43139	74375.6
13.497_359.11397	58718.8	48666.7	35098.4	44815.3	19091	35008.6	38892.4	8789.8	27937	34987.8	6985.05	27598	37896.7	152462	227860	26288.9	11785.2	10675.2	21322.3	503.169	9010.17	2038.99	10564.5	37856.5	25109.8	36056.3	77880.9	14641.5	30910.7	47052.1
4.988_170.05547	1159.48	35481.1	1159.11	24549.7	919.695	26376	33757.2	43332.7	515681	38031.2	17008	52956.8	860.738	28623.9	744.777	1290.62	7732.05	28187.5	997.903	875.685	15321.6	1811	1533.13	823.785	1724.87	1006.09	2351.63	795.463	945.544	1183.08
16.355_234.16176	100073	96582.5	79117.6	40741.1	101797	37111.4	30170.1	137739	27667.1	49098.2	50921.2	97936.7	115648	29790	37677.2	71928.6	37362.5	82979.9	64933.6	109733	91313.1	117096	195021	164184	261585	120320	84148.2	110672	148561	98382.6
11.804_319.14495	44357.3	75063.3	39693.1	234135	8657.02	15343.7	125138	232562	120028	290634	44242.1	34611.7	9560.83	190942	33200	121800	190154	173149	16793.9	729.946	1195.53	839.653	236827	163306	2181.68	66988.7	33108	250889	228881	154309
5.816_249.08598	20912.7	18287	62637.6	11093.6	32055	19269.2	41190.2	25066.8	12581	29690.6	35651.8	39695.1	43013	28542.8	25044.4	27546.9	11587.7	13990.2	11278.5	16701.4	8078.27	15872.3	27469.6	66184.3	26455.9	43927.4	28686.4	63564.4	43980.8	52282.7
14.166_491.30099	419.765	405.013	415.497	453.06	528.235	658.995	416.624	622.785	495.869	538.456	379.66	599.182	615.751	582.268	441.009	709.95	718.572	780.739	494.68	505.612	561.064	466.695	487.257	757.217	720.038	624.961	514.398	505.466	654.479	1057.79
1.186_131.0735	1726.54	1455.43	1340.31	3667.51	1429.77	5113.41	2648.84	1356.1	504773	2231.87	1215.57	2143.07	1413.74	1128.06	1192.12	946.395	1099.07	1210.22	921.911	1111.59	1114.79	1033.61	2644.47	1570.15	3088.04	1356.82	2345.99	1348.26	1771.76	1479.16
9.148_184.1075	30552	20741.5	22796.5	23087.5	26985.1	33154	20536.7	34863.9	77731.1	33271.5	18637.4	27593.1	30932.1	19296.1	15703.8	122359	29851.8	84928.8	86517.4	130861	96568	187645	504698	503866	387556	174061	208102	85061.4	335960	140120
12.717_367.27186	2048.93	2027.94	7464.64	30291.7	28529.3	16063.1	8052.73	18023.9	6380.56	10737.3	2170.34	14048.1	11209.7	10039.7	991.453	84746.2	97711.4	62257.3	10795	4279.41	7722.65	37536.1	34529.5	14224.7	25984.8	74940.1	12530.1	21935.6	74068.7	79918.3
7.672_312.14704	369.27	659.147	308	821.297	291.653	38458	286.333	29072.4	1882.73	456.147	261.029	282.165	287.594	425.256	242.546	314.6	318.288	988.433	445.037	268.736	302.042	260.816	324.479	493.798	33673.3	297.937	347.929	298.954	488.952	312.816
12.434_271.25089	20094.8	16235.9	12045.1	55810.7	11356	56824.1	12290.9	36346.9	73086.8	16395.2	14072.4	45359.4	48188.6	48564.7	20818.4	7539.83	7374.02	8360.34	2324.97	1736.93	4382.16	1878.76	4847.51	2504.22	18761.4	6129.22	2335.24	2917.97	10343.6	3015.37
10.77_274.13487	1341.68	1301.88	1675.12	1641.31	1260.41	14819.7	1266.53	5078.42	1336.81	3846.04	1113.9	1288.44	3891.11	11711.3	1043.21	3522.94	1648.11	1291.22	1209.64	1382.29	1150.95	1206.39	1621.31	2053.29	1846.37	1489.54	1233	1687.81	1378.9	2437.13
11.751_275.11885	2263.71	58948.5	1746.7	17393.8	2192.28	23562.6	2729.58	129746	86278.1	40459.2	746.436	19987.2	497694	385942	641.026	94600.1	13069.1	86277.4	1437.78	448.245	500.914	478.276	3041.16	4675.67	981.315	1361.39	562.386	3998.73	3812.58	14940.9
10.986_343.14491	981.849	526.434	533.989	937.29	482.095	1837.67	689.093	5692.54	743.475	1378.49	1237.09	593.06	1457.36	506.309	467.919	690.177	1042.91	1134.72	540.802	560.882	545.141	532.637	2789.28	613.436	55163.5	638.161	540.969	612.144	2410.36	1904.75
11.037_287.11876	2230.36	1247.47	1491.68	8238.43	1227.56	88109.9	4609.76	20951.2	11935.5	2984.49	3018.36	4813.22	5590.38	1950.64	1184.68	3069.58	2580.48	26121.5	1313.64	1582.21	1230.23	1281.62	2926.09	1687.6	36086.6	1577.1	1393.72	1473.69	33169.5	2825.42
13.077_321.09823	2151.48	1522.43	1444.87	1644.22	176538	1717.82	12380.6	1617.18	23080.4	1825.52	12432.6	1951.95	3995.24	3309.7	138527	2106.31	21194.3	1712.73	114693	980.717	18033	1552.39	1695.88	157020	2423.91	152169	15386.5	2493.02	1702.78	8401.42
11.484_460.2645	1281.14	1035.29	1063.15	1301.16	1159.64	1700.09	1225.94	1489.18	1136.01	1327.03	1029.46	1063.17	1303.26	1145.95	1017.37	1407.6	1181.93	1506.67	1148.02	1147.12	1072.89	1019.54	1392.47	1403.03	2508.21	1452.54	1311.1	1349.09	1531.9	1417.22
0.827_125.01465	32680.8	79813.2	51558.8	127496	28534	49721.5	40777	42028.5	487783	47286.7	46486.4	52331.9	27163.7	32578	20979.2	13360.8	12879.3	21774.8	13510.9	18769.2	24938	21893.7	102403	37381.7	97526.8	29604.5	40260.8	29533.4	69550.9	42514.4
14.146_303.29223	24842.1	73691	24715.8	20194.1	11222.9	42532.8	332222	484590	95256.7	33159.2	9966.42	385448	16271.5	16184.6	13451.6	105187	163500	167938	48311.1	104371	100451	48159.2	81371.1	195787	154063	164913	122642	81729.9	87144.6	106966
12.773_345.16056	18722.1	11168.2	46930.6	89350.1	992.201	2232.72	122328	3456.75	50798.7	351224	55443.1	37225	7417.18	12610.5	1177.62	35919.1	210812	4074.34	1321.85	1135.31	1139.94	1004.16	63226.5	339890	3736.26	1312.24	1278.96	217330	55548.8	299672
9.647_298.18889	5423.73	16599	1739.01	1480.15	1455.03	24808.3	3616.28	27301.1	540.146	11966.8	4994.21	2838.36	28111.3	16335.3	1340.09	21838.7	5904.23	20270.3	1901.98	419.317	1929.8	875.808	18270.3	6097.64	18541.3	14242.9	1604.77	7655.98	17288.3	6435.98
16.933_398.24294	59723	43834.9	28106.5	47301.2	35375.3	27101.2	116668	50315.8	216664	37834.9	26268.8	68196.3	33275.8	22237.2	26500.9	25145.3	34873.1	24499.6	76391.6	31224.6	26554.1	28329.4	31310	41548.3	30349.4	29592.9	21361.6	119035	21092.9	46405.7
10.181_384.13926	1571.17	1516.78	46116.5	19589.5	968.184	687.377	4282.46	3686.93	16353.5	1783.9	352.46	17986.4	8236.33	1440.86	3419.73	482.845	491.029	1128.24	413.147	359.09	372.981	372.777	428.083	566.95	543.933	491.178	500.108	394.336	393.955	474.804
14.079_773.49004	7181.13	9297.06	6519.91	6750.12	8445.51	12401.3	8283.89	11780.2	9798.95	7425.78	7166.46	11417	18507.2	11313.9	16224.2	183740	132775	165895	137004	130758	108570	135924	261608	210743	123186	174943	139271	158158	111326	218922
10.58_456.2403	1221.72	2771.83	745.72	2656.81	800.323	18631.1	1641.19	11808.3	1043.12	899.177	788.969	762.436	8836.68	7696.38	721.482	9939.65	2092.08	986.321	945.734	777.658	763.177	748.291	953.122	1224.28	1060.51	1594.54	879.642	941.538	962.738	1268.15
0.9_158.00041	154492	199384	285919	77571.4	165730	273673	284282	338790	8463.5	242067	371138	224522	225967	134420	247848	215507	324701	316642	182183	159533	194466	142841	156382	117833	3723.55	261165	141909	195316	169483	197639
12.109_381.11939	110588	58303.3	155622	126910	81454.3	2155.93	102396	1636.67	471560	4138.17	191124	205729	3615.46	2426.6	193065	80178.4	75000.3	2449.53	143670	2058.51	12753.3	7804.38	304426	52658.1	3024.51	26844.3	57263.9	102032	177021	72958.5
3.502_290.06241	2603.67	11070.2	20365.7	12209	3219.44	11253.1	8662.22	13802.7	299933	9337.07	15645.5	4204.49	9910.86	11787.4	13180.4	7256.74	6394.98	1398.03	1820.32	2823.55	3682.65	2534.7	3882.02	10063.2	5170.96	8259.29	4523.58	4474.34	5296.22	5829.22
6.433_179.09459	2414.65	1572.78	1500.37	1199.44	2041	1380.66	1515.58	1115.77	2189.56	1925.95	1547.54	1034.27	934.654	1153.58	1281.61	991.31	912.998	894.999	1275.2	1262.44	996.442	1021.67	868.669	1311.37	915.258	952.4	1657.85	1152.56	953.304	1730.08
6.351_244.17845	24373	84297	27043.2	150548	10706.6	211695	56001.6	217775	349614	106139	17067.8	41139.2	106058	190133	32200.6	10798.5	16087.6	127484	937.28	747.024	1157.65	1058.92	26663.2	4786.44	11752.3	15620.1	1367.17	6509.3	27170.3	6333.86
6.237_244.17847	7183.79	20038	10072.5	36116.9	10311.3	168354	18504.9	60113.7	349614	25002.2	5015.64	12698.4	21591.4	190133	11324.8	2243.58	5841.3	15534.2	1328.36	554.396	783.845	620.71	6593.28	776.805	40767.1	3239.08	964.588	6509.06	6305.08	1680.42
1.788_136.0385	28869.1	38107.7	26170.9	25956.2	10359.8	30860	35147.3	117727	47429.2	23782.8	120872	14931.9	95481.4	28917.5	134298	7341.36	12772.6	9673.21	21613.1	2146.69	35825.3	10455	25654.9	48319	26553.8	14154.1	6883.28	31135	16696.4	11986.7
5.566_216.09723	105405	118298	130286	95017	114089	111444	133906	136549	207066	113198	98125	130342	110695	75539.6	112056	134107	106514	77670.6	82938.1	100035	98129.5	85909.8	288576	265995	464183	142410	133715	141047	186879	149424
14.792_394.31915	1638.52	22746.7	1504.82	31925	1601.15	14608.8	9470.35	51255.2	12222.1	21658.1	2032.46	4013.26	13320.4	24893.3	1322.42	49910.2	17088.1	8096.13	9285.37	1466.63	3730.75	1626.19	2380.64	10473.2	9550.44	60696.4	1815.01	9041.97	29787.7	21476.1
1.085_132.02452	3143.58	3113.83	2600.11	23356.9	2228.03	6490.15	2387.67	3377.97	461597	2277.27	1967.13	2463.25	2622.25	3602.47	3989.3	2379.25	2385.37	1997.43	1801.21	1821.91	2326.35	1403.31	2293.23	2708.22	494.136	2027.48	2323.88	1961.25	2095.46	2384.88
9.72_287.20934	984.066	9574.67	494.739	82208.9	17063	137774	6991.83	60265.8	55503.5	104068	13365.8	41337.6	241919	51313.8	16956.1	164975	170188	177285	54883.8	1578.02	10150.9	143626	53495.1	1613.2	181667	63550.1	10424.6	9456.85	68390.2	93786.7
11.564_414.12459	612.968	472.029	465.969	510.582	534.992	811.392	585.096	8364.33	582.626	1039.77	491.321	501.581	703.622	11538	497.91	739.063	554.365	7000.02	566.108	528.962	497.544	515.195	843.51	643.437	2591.32	668.162	625.742	643.872	731.12	685.153
5.375_219.11049	57993.1	97389.8	40255.6	160867	76500	108608	25852	136011	10330	247550	171220	34703.3	30364	68912.6	85403.1	73276.5	195117	122265	79552.3	100462	125488	165368	245681	299058	125229	108393	195937	294293	229206	209562
17.524_116.06257	236.425	219.419	230.003	217.698	206.881	5454.54	229.449	188.428	212.083	1493.71	172.736	196.041	175.775	177.792	432.596	169.562	247.76	298.243	154.512	232.638	162.541	172.887	152.358	190.319	198.662	224.674	234.165	155.913	205.545	144.807
11.068_275.11891	2078.16	2434.05	1135.88	3003.9	1084.4	16576.1	2925.2	11059.3	2615.58	6217.55	1587.17	2088.91	34660.3	5521.6	1050.1	1428.86	1395.14	11404.3	1160.44	1102.88	1098.85	1132.15	2030.34	1545.08	177388	1512.94	1231.18	2266.05	1838.23	1669.8
14.959_579.2633	4401.94	1427.13	1824.97	5759.43	2608.98	2904.03	1343.51	1560.54	424.603	1065.02	2425.96	3817.97	3740.23	1175.61	1692.5	3582.89	2410.39	467.296	5416.41	1932.1	7546.44	3216.89	8460.14	8379.49	3489.99	2847.75	3555.28	2114.2	3588.58	5437.59
11.549_331.14488	898.764	10611.8	8344.07	33522	700.766	11279.7	20238.4	3953.84	16294.7	49515.3	6794.32	8048.35	3021.55	1396.82	630.44	6538.1	4413.96	104738	925.708	669.757	629.976	652.325	113881	3031.43	203679	1292.93	7036.63	7733.2	251190	37382.6
10.662_308.11911	484.649	487.568	419.985	424.689	397.309	479.815	407.485	451.458	554.173	422.011	419.15	405.054	440.616	422.703	356.188	466.12	472.389	460.416	414.604	408.618	405.342	631.777	454.408	540.613	479.815	707.449	430.092	476.48	511.467	480.882
17.522_114.04699	164.429	214.728	146.047	151.404	143.882	3612.32	131.962	131.048	139.464	2912.47	120.134	136.343	122.248	123.651	300.862	117.927	124.852	207.422	105.24	161.795	124.207	120.239	105.962	132.363	160.239	156.256	148.545	108.434	142.953	136.428
11.252_331.14485	706.78	999.65	1560.5	1847.19	612.572	54809.9	1149.27	19889.2	810.636	1594.59	807.771	813.604	644.456	1053.31	557.646	5784.39	853.53	104569	724.138	579.993	647.669	615.644	1463.54	817.633	182744	865.337	1960.45	1757.22	251190	1042.67
0.733_447.97094	18572.7	41173.3	31600.2	109124	22437.2	56891	23474.4	30348	435735	35363.9	34622.4	16515.6	30166.7	46423.3	28588.7	28471.9	21873.7	71923.7	8139.3	4000.12	13971.8	4619.74	96004.9	41523.7	136043	23252.6	15132	20517.8	47104	34458.5
1.105_244.17845	27765.4	111187	44562.1	258613	15802.7	317964	64960.3	189523	62197.6	83526.8	27029.1	50164.9	95462.6	218116	51111.1	9007.32	21638.1	109891	4295.57	2324.83	2968.53	2267.55	12452.6	4466.67	1801.51	16095.3	2965.38	4061.84	20603.8	7462.6
13.195_372.26607	677.597	8158.68	2735.75	24587.1	3502.27	6749.59	6461.92	22166.5	35919.4	4896.64	27682.3	3699.84	5528.45	13624.7	631.137	5478.18	3395.01	950.398	866.02	813.845	4713.52	967.294	3068.05	2651.85	659.204	16967.9	2106.64	952.927	10474.7	1466.02
14.9_517.31694	2742.72	2052.08	2307.74	3411.02	1506.24	1229.14	1440	2723.12	2261.87	1697.79	3733.11	2626.11	2566.34	1716.14	1398.59	5587.6	3133.19	863.596	3092.13	1969.99	3793.38	2801.25	3239.32	6384.83	3253.79	3975.79	3717.77	4590.69	4050.94	5784.88
12.702_356.10789	64363.5	301058	185143	253063	8125.59	1991.1	106888	2231.64	173031	93057.2	9172.87	262342	161702	12980.4	1285.2	332760	165432	5839.05	38742.3	1344.01	6783.26	2305.77	30318	59539.1	2582.57	2475.39	1514.06	313635	21304.1	143813
15.162_471.33456	2099.23	947.408	4496.54	2385.67	5874.7	2155.06	4786.93	6715.35	1327.16	713.549	3173.16	12618.8	1839.91	1033.95	2304.24	17305.2	41521.1	35588.8	4854.64	10829.5	4319.31	29511.8	39593.2	2416.2	28587.8	155139	19344.9	116581	32067.6	23530.7
14.257_463.29303	2188.06	3091.52	820.487	1096.55	1035.54	6412.63	1375.97	4084.96	1015.38	12382	2966.35	3662.4	3833.64	29325.1	1153.81	381586	19106.9	41952.1	85489.8	2018.33	1067.72	1169.89	2226.99	6023.29	14065.1	294058	1719.69	3658.36	26699.4	20200.7
10.046_532.16309	406.678	328.534	305.851	315.789	285.571	1066.52	308.727	1079.18	383.655	330.84	274.718	318.265	357.451	383.197	307.779	495.29	358.903	356.526	324.044	403.121	313.016	289.309	404.999	351.667	455.694	598.698	314.498	324.872	335.841	444.969
12.217_356.1079	37076.5	139243	174847	44616.7	4007	104217	107511	177926	49868.9	27218.3	25790.8	99767.6	411987	28291.2	23787.2	182676	35093.5	79684.6	31130.4	1160.45	1280.01	2101.44	2412.59	70536.1	318490	23980	3093.08	64335.9	4724.29	32645.6
7.494_312.14704	7833.41	14497.7	20247.9	11527.1	991.182	30333.2	28843.6	17488.1	291208	20633.4	11891.2	30288.4	12395.6	23030.1	4817.89	2863	4662.28	23347	785.986	501.307	1416.53	2265.66	11639.5	8402.35	16151.2	24542.8	6355	2000.65	7531.47	1597.76
14.821_336.22726	104933	142823	168607	101783	203912	81564.5	117733	140894	160735	78902.6	154804	93964.4	166115	176587	53450.1	90999.4	34948.4	20662.4	61379.5	32558.5	103334	98819.8	368698	97864.2	362858	410391	52735.5	117754	46982.3	316959
12.186_327.13584	1005.64	1049.25	1640.29	9095.34	809.029	2394.67	1124.76	3822.5	1460.62	1525.62	871.958	3477.39	1655.99	1523.89	16098.3	3382.25	1198.31	4411.25	49920.9	834.721	920.728	1175.57	1586.95	8116.1	2790.83	52659.4	1183.9	1408.07	1490.57	5230.85
17.664_376.26097	26644.9	61647.3	68655	132563	37156.9	30332.4	75089.4	31583.1	9561.78	67492.9	95582.8	25191.9	33297.4	92068.5	93018.8	15167	18229.9	11515.6	6623.86	2407.2	4152.1	8153.4	9937.48	25560.2	7120.79	8691.22	8018.64	11494.1	9352.95	16977.6
8.768_280.08784	13205.1	5516.35	4867.65	6967.94	3788.92	24109.6	3606.91	10317.9	68979.8	15425.6	1519.57	11606.7	8432.59	44839.7	3981.13	49133	15959.8	17000.5	19985.9	607.217	812.421	1243.47	45935.8	26769	1869.4	12984.3	9510.65	27902	38460.2	63395
5.456_158.08437	635.592	644.187	584.657	1375.71	489.331	1534.14	1004.41	646.426	403264	782.651	426.671	548.556	407.858	510.867	366.416	422.024	374.12	386.242	379.741	373.534	399.236	413.478	883.827	472.906	401.162	421.44	440.309	389.813	709.975	427.203
5.649_244.17844	2060.32	7518.65	8094.38	4113.47	5947.95	9552.18	1891.63	19144.1	401063	5431.94	1326.02	8010.1	4597.13	6568.73	1649.04	1484.93	1293.49	9330.12	1207.52	1202.27	1276.33	1193.86	36008	1362.72	36517.3	1223.66	1280.14	1411.79	13146.8	2564.99
14.666_345.1606	36878	41589.8	26748.2	25823.1	16755.4	44581.9	99898.5	400754	1212.09	229779	37616.7	70226.8	63453.7	166238	39103.2	113539	41751.1	205365	24355.1	1606.49	1804.73	828.619	143136	3971.05	285734	13499.6	9863.98	43773.9	20044.4	36215.3
14.856_531.26336	1527.76	963.895	943.319	1364.6	1311.84	1247.56	611.711	1148.56	729.475	1365.83	1511.64	837.307	1452.49	639.195	1054.73	1756.54	1147.43	799.744	3465.09	1579.43	2469.01	1465.41	3054.49	2798.05	1033.54	3009.38	1813.28	1073.46	2848.26	1923.86
8.774_298.1025	1579.18	972.443	50206.1	18410	2451.89	899.365	3297.45	3309.71	13300.4	1469.81	317.24	17318.2	5772.85	1268.57	2623.34	336.355	494.874	289.938	286.562	323.956	1502.63	257.526	495.818	777.706	280.913	525.15	305.78	282.589	462.506	353.321
13.023_302.16606	2195.11	2295.17	2121.95	2403.21	1747.44	6235.9	2147.96	3825.48	2407.15	2801.46	2336.66	2312.1	2143.73	9273.09	1655.77	3078.6	2555.64	2503.33	1766.23	1689.24	1848.22	1457.4	2566.28	2403.97	2435.62	2178.9	2157.32	3021.13	2488.79	2996.05
5.26_135.05454	16331.1	20341.4	8754.12	30941.4	20991	3936.45	15300.3	9466.71	8777.07	11549.2	8833.63	7513.53	7272.2	4763.06	10499.9	18359.8	9011.74	2302.51	10873.2	9739.39	10641.8	10057.2	11624.1	40896.1	21986.9	11596	7184.68	42154.1	6816.02	20065.8
14.103_391.14018	7453.24	15224.1	12211.3	39935	3284.19	158389	47801.2	122491	9070.89	243350	20636.1	32388.6	17531.9	81872.3	12994	8898.05	48672.2	130876	3112.45	5773.69	5506.03	7699	38907.2	50395.2	130619	9058.75	6294.74	42181.6	16577.5	203827
15.735_324.22966	791.676	1947.67	1140.05	2424.95	826.748	2584.37	1563.19	4975.69	2802.82	1264.22	8386.74	1683.82	1413.64	1355.6	745.136	7767.17	974.495	873.55	1096.25	723.254	1203.25	643.91	1566.58	1570.26	2128.58	1305.14	764.334	1745.27	1758.55	1364.5
13.263_411.29805	4873.73	19489.2	8921.75	11688.4	11480.2	39653.3	21631.8	76245.6	20254.7	21652.6	4177.35	24758.1	53282.1	24926.9	1183.98	23894.7	13710.4	5623.25	9550.18	3233.76	4782.56	1690.54	5977.9	6333.67	13854.9	9659.22	2218.08	11301.8	7368.05	13341.9
13.874_375.10883	19537.2	44527.1	17423	44969.8	2077.55	109837	89534.4	246750	12251.8	99013	14758.7	69134.1	98208.9	81607.2	7582.32	36976.9	56542.9	70652.1	6129.07	1848.42	1861.59	2014.66	71168.4	31170.4	113174	2867.64	5888.24	38472.9	46297	44245.3
1.076_121.08916	302832	195638	240971	182750	175495	106988	99008.7	120629	78092.3	150085	200050	177199	124397	184077	177364	178741	190097	126000	175426	194723	201303	157596	245623	289123	40198.7	288050	341261	122773	276669	226179
0.725_431.99696	5032.98	16473	11224.7	37438.5	8531.6	14044.7	6888.73	7732.58	385651	11985	19442.9	3164.6	6832.71	17039.9	13144.5	17037.3	12693.3	38807.8	7368.33	5238.94	9318.33	8375.14	75975.5	26429.2	41828.9	17605.6	17818.3	7313.52	23211.1	16881.8
0.743_315.9126	130799	64257.7	60708.2	217072	48467.2	182868	96522.5	145252	52154.8	75651	24506	103436	171601	92718.2	43073.7	32634.8	17233.5	66684.7	1517.4	557.956	9440.74	326.903	26454.4	24925.7	328489	11459.3	2278.48	37010.9	39024.3	28306.1
11.64_213.1727	40627.1	8213.2	10167.9	8250.07	11087.9	10623.7	15256.1	16449.9	22813	10494.4	18453.3	18237	17851.8	42570.1	11869.1	11133.6	11857.6	13967.6	16148.6	10197.5	9944.13	6489	18246.7	60947.5	18084.3	28358.5	10824.4	38856.6	21369.5	29658.1
11.985_275.11885	38504	124318	39203.8	83487.6	12289.9	977.676	30690.2	30920.9	86278.1	13317.7	1937.42	59362.9	207990	87442.1	9048.05	373093	38693.5	24041.1	39995.5	501.049	533.091	556.229	2193.31	110534	782.751	32525.1	1916.3	72560	5628.52	39994.4
0.738_217.93584	114282	79728	75656.7	236934	60504.5	202812	98775	225623	147073	104135	43078.2	109512	173177	120396	60572.1	50477.6	34934.5	102455	7697.1	3400.24	19648.1	2461.58	59914.3	44846.2	340771	24751.3	8968.77	50422.7	59965.4	46397.6
0.724_185.98806	21659.2	43335.9	38208	87805.2	26867.2	48848.3	26353.5	32847.2	382332	37404.3	48469.8	18058.2	28676.4	44579.5	34359.4	39410.9	32921.2	79057.9	19696.7	15138.9	22934.7	19627.4	96455.4	47550.7	96546.1	36026.3	35678	24125.8	58944.5	41952.6
5.94_300.11157	1204.84	2104.62	1790.79	3352.63	1009.42	5176.15	917.593	1319.88	1072.52	2468.63	997.94	837.935	1668.32	9956.04	3710.89	5814.15	5972.5	1135.11	835.8	1355.42	960.987	750.286	1786.87	2343.94	817.37	787.664	851.201	1146.46	1410.64	5272.04
14.624_555.26329	1866.93	1072.68	1496.67	1994.98	1101.66	2292.03	697.447	2242.5	1568.48	723.235	1931.37	1158.42	1732.64	1439.11	1422.46	2580.02	1465.7	311.244	3377.81	2419.27	5484.72	1286.71	2832.92	2827.68	417.647	2696.91	3287.65	3378.21	2208.46	1894.95
0.899_215.04694	173023	213461	126092	147003	193972	120863	137597	80314.6	23104.3	104003	75608.9	196483	174108	180975	113740	55570.7	27383.9	60582.1	71231.4	82871.5	144388	84889.3	91714.4	138751	4662.79	95681	110146	118895	113917	156354
13.684_282.12049	3085.67	12009.7	5134.72	32553.9	20459.8	32546	19472.8	46620.1	1847.03	88523.8	9099.54	4670.21	8048.34	10574.7	1290.46	21479.3	10731.4	18528.2	2399.18	687.295	17079.8	7318.18	14199.5	198286	7854.33	41586.3	7195.74	3997.35	16749.3	232879
6.623_309.15726	3241.12	30134.2	1326.5	81721.3	1030.17	24584.3	6531.25	27729.5	33642.9	11990.2	8750.59	10009	30351.7	9414.25	1914.81	119584	49973.8	99095.4	5023.26	4721.82	3118.13	946.51	1674.05	42094.4	55684.2	182287	2767.9	33166.6	69601.5	28692.8
4.871_231.14685	7240.1	4224.88	11075.7	64436.4	10278.6	39050.2	1298.05	7799.79	370628	10663.8	3838.55	4636.11	26091.6	7317.16	3070.7	3765.74	2402.41	2851.32	1810.79	1107.59	1083.65	1029.28	1175.1	1333.29	4018.29	1247.23	1183.55	1219.57	7291.22	2337.04
10.2_352.10892	1334.04	2317.28	1454.08	1281.97	1202.04	8017.27	651.836	893.386	1964.31	5392.33	583.702	726.868	2115.42	9653.61	554.294	2372.3	1432.33	1355.54	680.814	649.606	965.072	610.316	683.699	1752.13	2648.04	894.466	684.608	990.31	3274.37	4817.01
0.737_135.93286	124215	76096	70081.6	237616	62108.1	195045	105025	219314	115533	115499	42427.3	124262	182488	123289	60618.3	52960.9	34817.9	95820	6870.31	3284.31	17953.3	2396.01	50999.6	41998	342892	23613.1	8382.72	50148.5	62340	45965.9
6.89_309.15726	876.442	7989.41	708.729	21988.6	674.951	46572.6	2403.9	16926.6	4269.2	2123.56	4462.42	560.519	19134.6	1629.42	577.274	15676.2	604.504	132094	765.955	1291.49	575.268	672.644	598.806	9024.81	104441	2180.99	643.167	695.703	689.746	5046.31
1.076_304.01042	28881.8	15220.9	23139	8578.97	15945.8	30057.7	7848.25	12944.8	12058.7	10273.3	28013.5	3699.71	29430.1	9589.24	36245.6	19721.5	21588.5	4256.47	50311	40409.1	82536.6	11186.9	51657.1	73309.8	18545.4	3510.72	107869	4676.28	175272	164411
13.158_357.28754	59442.5	17593.6	27827.7	7878.18	23139.4	81618	2319.74	9901.58	8331.08	18936.2	27409	5450.81	82708.1	34479.7	5465.47	38408.3	24331	33956.3	29225.6	8519.45	28786.3	4946.07	38087	10928.1	1418.73	7895.82	17604.3	17653	20470.1	39572.7
1.144_197.00012	103708	162702	183280	25234.9	124727	113616	39378	45861	18173	81134	105516	44147.7	103285	55589.8	60476.1	100353	208905	58882.1	79465.6	63145.8	49488.1	79840.9	68432.8	6811.18	22975.9	156911	67274.6	86639.6	254445	89877.8
10.827_251.11891	1389.54	1071.78	1012.93	1325.95	4276.46	33762.6	1891.33	2781.19	1470.81	7213.62	1081.73	14328.2	31951.1	4211.07	1205.62	61438.3	1150.91	5889.81	12902.2	1064.65	1138.93	1048.64	1451.49	14517.3	1810.1	7010.4	1234.26	1231.85	1266.63	5864.23
14.651_284.13613	2107.75	3145.92	3593.16	84580.6	10060.8	55186.2	28821.6	65103.8	2450.99	67210.3	5731.8	5495.53	6270.98	17896.3	1920.12	34794.3	12174.7	47288.1	9915.72	823.372	7425.38	9466.32	26159.4	119674	15128.9	145150	6754.2	4365.49	33168.6	166235
14.21_350.16602	698.861	884.6	1114.75	677.495	725.714	3104.24	997.502	961.034	711.582	1523.52	876.88	966.068	930.377	2685.28	808.598	2280.46	934.934	1216.73	1032.31	657.852	733.539	1054.18	844.593	1041.15	1379.66	984.532	799.328	863.45	1017.97	1376.29
14.228_527.30115	416.423	388.422	347.323	352.522	468.873	557.013	405.303	450.94	360.128	367.561	445.278	433.196	409.076	419.048	671.57	930.662	332.044	739.538	533.825	329.306	448.481	529.704	545.679	506.185	438.087	493.058	516.434	491.434	430.128	442.794
14.067_431.20955	39624.7	31254.9	28270	26551.8	36634	38571.4	30889.7	21522.6	31905.3	22814.1	27955.8	24717.4	29824	27445.6	30059.4	223412	142388	197429	238814	269567	254541	205369	295403	292563	205867	273601	242307	245016	215292	275720
26.166_428.36499	156889	100224	204917	114462	112783	173687	77652.9	62709.7	83855.9	113067	355858	89208.6	71011.5	144515	119347	95663.4	115409	25252.9	93306.7	104497	96369.6	172341	340091	195421	8672.21	15768.4	49081.5	23825.5	60526.2	68035.9
1.09_264.14714	11322.8	49139.9	16173	92576.1	8790.89	141367	37505.3	84713.7	102530	33331.5	10012.9	38457.9	51547.1	79655.6	25310.2	6849.19	13863.8	44205.8	1180.84	1194.41	3473.09	1271.54	9213.86	7883.89	319.178	15562.6	3008.55	3945.44	13659	2391.19
12.142_289.13445	52171.2	263841	101494	326477	11496.1	14180.2	137482	145382	25663.6	51319.6	38858.7	89760.7	355127	19615.2	18260.2	115399	58777.4	91010.1	28545.7	831.107	2495.07	868.087	68859.6	64773.4	204730	89664	7652.28	116607	27512.8	67827.1
12.877_315.27696	1603.75	2489.43	1973.87	8418.08	1098.86	2278.75	1568.95	7255.64	22030.4	1673.36	4983.74	4924.12	2441.9	1430.74	1044.91	1527.49	1569.15	1736.02	1309.94	958.439	1458.49	1649.39	1930.12	1377.87	1929.86	1377.57	1081.42	1483.74	1871.17	1613.4
0.735_529.97425	8080.85	22896.4	17670.2	62785.9	11418.8	28105.8	10959.4	14989.3	354109	19387	23211.6	6009.23	15150.8	29325.8	19203.7	20000.6	15222.8	47222.9	5898.95	1144.26	9700.81	3170.15	69603.9	29751.9	76575.1	14330.3	11355.7	12305.9	32955.7	23146.7
0.734_365.96778	26708.9	43419.3	37899.9	115492	24632.8	62555.9	29479.1	40041.4	353327	39662.9	35608.3	23738	38252.6	52024.5	29807	29791.7	23007.5	68618.6	9070.64	4235.94	16679.1	5289.15	87244.3	36769.7	139992	23138.9	15003.5	21366.3	48969.2	33793.1
12.045_588.2088	173562	137855	176573	105044	159136	68431.5	104738	48707.7	105650	65791.5	120134	124024	55826.1	53681.8	130299	144230	198802	69565.1	184217	206850	190305	229522	319151	328188	92336.1	275617	273661	213090	246197	261521
14.179_210.12546	2542.66	1685.76	2346.57	4919.92	1893.36	4657.92	3036.13	79918.9	1198.56	4796.22	3432.38	5008.9	9306.76	4901.38	1723.23	4769.11	581.436	2018.33	6869.57	570.544	1015.42	5066.68	7271.15	11611.3	1368.11	2410.77	1543.18	686.819	2698.84	33274.3
6.814_129.15174	2683.17	2873.2	2771.85	2531.5	2408.36	4438.33	1940.73	4058.58	2388.62	3418.26	2782.35	2615.19	3751.86	2913.85	2556.24	4203.64	3259.59	2487.12	2701.41	1692.64	1588.59	1865.01	5040.37	3141.16	286973	2917.1	2429.63	2567.49	3413.42	3344.18
12.547_356.10793	33429.6	301058	171217	248343	8125.59	2976.34	1564.93	2868	6816.54	119752	12857.2	48592.8	249318	218204	50368.4	332760	7098.05	85523.6	56147.7	1340.26	9168.17	2305.77	30318	34457.8	2668.99	33308.5	2372.08	8001.31	21304.1	48120.3
12.12_422.18718	647.392	2953.49	1329.22	2323.43	1066.37	1621.53	1532.04	1280.51	1573.3	2043.11	1135.91	573.005	854.502	3918.5	1937.38	4507.97	4633.85	3637.93	1845.46	594.883	605.809	735.764	1609.81	841.341	1762.91	860.735	806.564	855.779	941.565	3850.39
7.473_342.122	2952.49	15221.3	6657.54	4611.19	3330.25	3581.49	2760.79	14118.6	13800	6174.52	3980.77	6840.14	6496.43	11551.2	3662.9	15791	15831.2	4373.37	4762.56	6398.17	8464.78	6236.96	3629.78	14355.7	656.326	7406.76	7046.14	6070.23	6572.25	15336.9
9.443_298.18889	5460.3	13590.4	1130.45	2805.71	2119.39	57481.7	5178.41	22400.1	485.72	11226.5	4857.52	2074.72	21268.1	15006.8	1798.27	7420.93	6935.88	10883.7	670.767	270.831	902.535	582.067	17544.6	4606.23	12996.3	4722.56	772.949	3642.99	11602.1	3833.08
6.71_297.08921	4908.84	6532.04	4328.94	40575.6	5958.44	4233.9	2328.17	5388.94	345129	2410.22	2422.85	6197.11	6049.62	2607.12	1419.83	3042.2	1283.93	2061.34	3847.61	3596.38	3366.1	2436.42	3878.34	5014.63	8531.15	3746.55	2137.57	2681.77	1223	3163.59
11.993_414.19392	723.95	633.725	700.311	2756.58	869.445	854.591	539.74	894.006	771.278	812.463	970.726	902.918	773.735	985.919	1045.56	864.992	717.313	943.107	727.344	757.485	631.486	631.319	625.014	811.259	1256.7	1295.28	820.283	722.249	1105.98	744.588
1.177_129.05783	4031.8	3601.47	3247.13	4330.4	1425.59	7184	2795.68	1669.54	341897	2355.18	1570.87	1798.99	1154.8	1428.33	2079.08	1063.94	1313.76	1206.69	1233.14	1108.34	1379.55	1372.3	2894.22	1853.66	3079.02	1277.38	1322.18	1344.32	1766.59	1474.84
8.35_357.26243	9047.71	14473.4	7531.67	39497	2121.56	4525.66	11844.8	35424.9	8445.9	19238.1	6220.8	8776.73	19652.9	62843	10587.6	14200.2	14185	41458.7	505.05	423.828	1213.98	394.888	8288.36	5659.35	14657.8	8778.64	1773.98	3044.15	9996.16	867.027
13.043_345.16056	3442.94	1412.87	1095.31	1246.43	8213.58	1854.45	1451.9	2371.03	7483.29	2643.88	32892.1	10671.9	2333.4	9504.09	18424.9	7693.54	33745.8	1200.92	2967.09	949.388	9344.87	1184.91	1990.78	339890	1263.24	35284.8	12221.2	93138.8	1168.18	1239.98
13.686_293.19876	8175.51	3902.87	702.187	85181.7	7377.78	4573.76	3811.7	9086.25	19599.8	4657.59	3117.16	779.702	12976.6	17575.1	3397.88	6547.86	2162.29	10403.3	528.594	473.133	9924.95	3691.24	8089.66	19125.5	4379.78	7176.15	1437.61	1697.12	1248.98	14163.3
10.06_332.17322	10567.5	17904	2630.56	1369.61	2008.99	21401.8	5403.2	28869.8	463.947	10815	13397.2	4916.09	50459	23373.1	4023.02	69929.1	13727.8	30138	7372.47	3970.94	7853.64	3444.6	35808.3	24218.4	10250.6	29538.4	6224.61	29177	48371.4	26025.4
14.71_336.22726	95595.2	116640	147808	92194.8	135096	71752.9	86870.9	107229	141252	58908.2	124739	73134.3	108598	161909	39339.7	64701.9	32577.3	15715.8	35619.8	26961.4	87865.6	87863.3	300410	76941.3	333262	316420	38240.5	93146.3	32474.8	245272
6.688_348.10318	2907.32	3096.22	2869.05	2323.02	724.763	1991.22	1741.68	627.537	1652.44	2193.51	946.945	922.104	1442.52	999.541	1212	1568.03	649.461	640.208	665.412	602.384	607.951	1377.27	709.839	845.872	664.613	1314.73	873.261	648.597	835.05	1084.68
4.119_119.07356	1696.7	1729.74	1429.31	11479.5	1278.81	4071.93	1676.2	1122.58	332258	1098.1	1056.76	1023.83	955.983	967.798	1217.01	979.378	998.973	940.789	973.204	957.489	950.837	935.184	956.1	1128.93	982.841	955.96	948.056	976.438	1016.22	937.021
11.401_277.13451	978.058	2944.32	1681.26	3387.22	609.333	13623.2	2297.09	864.996	1590.82	3645.35	1743.17	2551.67	7611.27	7857.42	707.141	3667.42	1411.21	6387.69	823.947	662.052	619.211	664.685	806.018	2154.46	311190	1214.35	759.727	2431.54	1449.91	1593.24
18.682_573.40294	532.384	3053.9	634.28	14741.2	500.524	2405.89	1628.47	743.1	423.022	581.787	444.449	1939.29	612.417	8689.27	266.097	22977.3	11492.3	3188.82	4970.04	1387.63	574.963	223.252	2925.75	1677.67	6725.08	26164.1	237.693	12835.7	13664.3	7756.65
8.665_391.24675	6510.34	34411.5	10290.3	87467.2	859.209	53005.6	11508.7	23587.3	10520	43243.6	10566.5	22442.8	37542.3	91223.9	12560.8	83353	17699.2	42562.5	2069.95	3413.59	2683.49	1917.05	21177.1	25857.1	8635.12	66152.8	8219.04	9415.1	29519.4	6988.2
13.78_312.22968	2214.75	1816.97	2536.67	9513.27	1930.19	7148.7	2594.74	7071.87	3117.8	1513.99	33992.5	1868.86	1360.63	2500.2	1292.28	1499.4	1814.13	1312.82	4630.41	1802.89	1359.31	1265.93	2006.33	5254.37	1166.69	5170.26	4254.55	1052.7	2256.25	5708.45
8.946_352.10892	763.677	707.649	738.444	623.12	530.329	633.657	1027.84	982.948	827.031	600.666	483.891	501.823	773.102	3781.56	504.104	982.679	563.961	569.076	593.743	554.355	547.104	553.859	580.874	615.734	676.546	639.822	587.751	572.268	742.784	645.065
5.453_220.08476	705.749	927.936	731.306	2790.81	543.344	4285.53	945.385	679.819	328296	1185.59	648.132	877.04	452.878	535.726	406.861	468.608	425.945	428.876	421.657	414.765	443.304	459.119	1555.61	634.555	513.876	467.959	488.911	432.841	856.093	474.358
10.046_494.21634	790.819	638.863	594.754	614.08	536.757	954.604	599.443	1784.06	746.05	643.347	591.562	618.894	695.094	745.159	598.502	879.346	697.917	693.296	630.131	598.93	608.686	562.586	676.316	683.847	886.137	669.116	611.568	631.741	653.071	781.224
6.987_135.0684	5364.26	2744.06	2493.84	3063.05	2734.55	2077.32	1729.25	3012.16	5431.01	2111.74	4621.4	3048.28	3075.38	2881.99	2225.66	5579.1	2175.12	3097.63	4217.87	5146.85	3979.91	3765.18	7016.54	8031.16	13122.9	6231.49	4571.99	5039.62	4582.04	7244.38
13.364_148.01599	35721.9	31502.8	27322.1	29853.5	29655.8	29197.3	30522.7	40203.1	37700.5	30579.3	27597.3	36054.6	39345.4	27734.8	26737.6	144474	60890.5	112640	98343.7	145498	108975	185149	325801	289743	255397	95954.9	195606	56888.5	279475	60060.2
11.053_309.16063	597.835	471.494	485.995	472.731	463.97	539.074	491.35	1446.21	571.881	483.661	669.095	430.126	531.025	460.456	421.018	583.509	495.391	506.568	496.504	456.258	431.284	484.4	555.567	637.846	1000.5	588.708	526.771	556.997	571.098	596.29
15.327_168.1626	14006.4	1063.93	1310.17	49247.6	7925.05	1025.59	1691.2	600.008	2999.38	1257.99	1178.03	139365	1231.53	3554.82	2576.05	999.275	464.518	1266.78	1610.52	857.208	2525.07	2872.62	9122.52	7064.5	43436.1	33871	9337.94	4857.94	5480	1734.63
13.476_369.2875	10593.8	6808.94	20185.7	37013.1	6127.48	23799.6	14991.6	14802.5	6613.75	12803.7	25091.2	27881.9	10279	13050.7	11506.5	65153.4	172422	147214	23678.6	13661	21500.2	47567	87905.6	4970.96	120938	76967.9	43826.7	47880.4	58791.1	69978.2
13.256_298.17527	92822.5	83143.2	79599.8	43731.6	76924.7	93748.2	73043.6	106733	30650	70991.5	71790.7	94296.6	90351.6	68656.5	48381.9	187637	96700	90877.5	155792	176498	139761	129711	214752	310758	155647	186906	192122	187239	143649	240024
3.345_230.01013	2461.74	2399.62	2696.05	1957.3	2066.02	1863.4	2237.53	1874.72	319405	1677.96	1549.45	1530.9	1482.75	1421.25	1647.7	1492.95	2830.79	1379.14	1500.24	1420.89	1756.03	1332.7	1639.54	2305.04	1405.58	1566.63	1805.44	1743.51	2227.13	1444.27
5.156_126.04295	12170.7	50526.7	12827.6	52781.2	4937.1	25012	22373.4	45969.3	34558.8	44784.7	15904.7	7886.78	19086.6	42555.4	20517.3	33303.3	17152	7923.68	4686.1	3435.37	4688.52	2057.71	3996.55	32575.9	25950.2	5057.19	3346.38	25950.7	17907.5	35418
13.523_466.26042	15365.1	19663.5	9437.57	100788	28021.7	50676.8	29122	35237.9	2958.5	71591.5	5833.32	9727.62	32141.9	57133.2	4457.96	82882.8	12607.7	58708.9	7367.46	361.648	13156.7	11174.6	32915.3	100214	25628.3	66840.7	7975.91	3279.39	16041.5	159837
1.695_135.06842	1109.06	1690.08	1274.99	898.311	1318.61	1725.38	741.695	1715.58	319055	1040.75	2039.35	1648.87	1710.11	1604.3	608.815	1985.55	1967.4	1674.43	1151.35	1217.4	1644.06	1326.94	685.984	1272.82	1548.45	1123.95	625.754	1505.73	626.549	1777.2
15.153_196.08887	6784.81	7220.03	9150.85	12110.8	6208.85	4616.09	4351.13	6784.83	3881.36	4915.28	5090.76	6754.53	5852.13	5139.94	5083.33	17464.9	4159.26	16123.2	8552.63	15792.2	16725.5	318874	41487.7	29329.5	56018.2	10928.8	15263.4	7213.79	36325.6	8935.78
1.86_306.97496	16819.6	17930.6	38700.1	21713.4	23595.4	14949.7	1771.31	1755.24	1463.41	3941.02	6007.48	1479.81	3958.95	2722.09	3222.53	5893.76	10049.3	2150.39	8391.36	3106.16	30646.7	1955.81	16361	27551.6	5694.91	10799.3	15536.4	3763.56	38353.1	45613
12.665_157.14662	44235.8	49340.8	38397.5	126569	36425.5	60228	31420.8	49845.5	58605.7	46011	31727.8	41564	52291.3	46097.9	31048.4	108616	38602.7	87575.3	52145.9	81333.3	67814.5	145735	261147	167882	224249	95295.3	102637	45282.8	232755	56613.4
8.982_335.15897	1302.07	786.792	971.494	1787.36	662.315	1392.17	678.397	759.248	1656.99	1322.04	708.687	626.714	1391.33	746.804	671.199	1631.77	1304.29	1251.46	1840.69	1103.92	660.109	691.701	725.439	768.976	763.531	1205.98	1318.15	804.956	1134.56	1084.74
1.152_139.97859	142966	51068.9	36196.1	29953.3	45162.8	78425.8	46766.3	73242.5	22923.8	56567.3	116570	18462.2	79626.9	61637.2	103340	97168.6	51819.5	21211.7	167938	110410	138468	19938	175461	285403	27788.2	19278.8	228733	35005	204296	129074
12.17_375.1025	97604.3	54143.1	230107	117563	83783.3	1128.48	110288	1017	12389.7	1069.15	264886	158155	1160.51	1067.94	212989	113628	65672	1030.97	136840	651.493	15679.3	9782.95	7829.14	52568.1	1955.81	25080.8	62614.2	91101.4	259354	71284.5
1.099_273.99992	80132.5	103738	191206	28591.5	127466	60234.1	9997.76	11414.6	7982.81	24228.9	54540.8	15207.3	48589.1	10669.8	25829.5	34655.5	77430.5	11956.6	47920.9	23041	34197.3	24857.2	34212.5	8681.96	55101.3	104032	38430.6	30380.2	57626.1	102660
0.746_479.91891	66293.7	45714.9	41086.5	178698	32001.5	123359	54679.4	98030.7	74966.8	59049.8	21710.9	52336.1	97518.4	63321.9	29379.9	24029.6	16050.6	59628.3	1869.68	516.343	6866.88	367.813	32101.8	23172.9	283879	13038.8	3225.91	24028.9	33023.4	22586.1
17.546_571.38727	450.524	15135.6	1010.36	4991.56	409.423	3977.18	682.566	5336.92	410.684	683.319	397.264	569.154	334.951	2392	824.341	47793.9	6150.92	12404.5	2040.81	1145.61	353.306	329.448	390.377	3189.95	17390.5	11607.1	446.216	6163.66	3166.4	1592.67
1.115_163.08576	4704.1	4659.59	3890.85	7098.93	3334.07	4849.41	2758.53	5054.85	10421.1	3407.75	2943.65	3197.29	3923.97	4070.57	4463.16	3560.36	3569.51	2988.99	2695.36	2726.33	3481.19	2099.93	3431.63	4953.11	2112.63	3033.96	4279.7	2934.85	3135.68	3568.77
1.116_155.97353	123931	122882	150198	42201.6	76516.9	107120	18106.5	50536.5	11595	53199.3	46593.9	62115.2	40118.7	17555.1	49230	45744.2	67492.3	25709.7	53576.5	67665.4	44841.9	78204	70845.9	9833.04	40828.6	114400	44667.5	66189.6	73001.6	141599
11.344_162.14083	24940.3	12372	13934.5	10390.6	13609.5	13139.6	15137	14826.6	310188	14057.8	11700.3	19467.5	15391.3	11013.6	14822.5	14978.3	10554.7	13370.9	20001.8	10766.9	8912.53	7791.13	21982.3	18365.2	19813.8	14520.9	11430	20057.9	10279.4	15901.1
13.528_311.14092	45409.3	57761.3	36579.6	136477	63618.1	105138	69300.1	87535.5	17263.7	105922	23011.5	33543.8	67015.4	95940.7	26655.2	129543	39772.3	92977.6	29439.1	1912.71	44072.6	38609.6	77391.6	147774	60217.8	101966	36591.8	18412	48178	201973
1.857_215.99454	41173	69420.8	59143.5	79470.4	45727.2	44705.9	13732.4	33780.8	1512.43	49316.8	49413.3	19695.9	36694	25327.5	25434.6	26463.9	32367.9	16593.1	39236.1	30219.3	86375.5	18495.7	50074.8	49119.5	34612.6	42081.5	50755.7	32266	68981.8	71644.3
17.676_571.38732	1393.06	11936.5	327.925	14334	532.363	6082.75	2823.22	20124.2	984.027	3592.27	1269.56	1345.41	1088.06	15887.5	381.183	35124.8	9729.92	25129.3	3178.9	3394.63	254.6	217.268	3348.95	11851.5	26423.3	26566.9	231.157	16303.2	60502.7	18627.1
14.8_416.30106	971.91	14138.6	667.294	20509.9	534.514	11416.6	7909.41	31813.1	8720.85	17887.5	2538.79	3248.27	9374.83	17396.8	548.835	35346.3	14200.2	5750.84	7081.97	493.738	2318.49	688.427	1555.1	8346.85	7573.15	46817.3	839.079	5443.82	21797.6	14940.8
9.087_335.15897	928.64	410.819	233.516	1639.73	246.072	1077.82	363.948	1319.72	2852.45	553.444	295.354	339.184	1703.54	1210.71	549.551	2222.01	672.148	890.143	1116.33	234.874	340.726	217.427	363.488	309.607	927.727	825.127	360.988	338.475	655.293	1963.61
0.74_463.94488	47495.4	54300.1	47833.4	171884	34425.5	104425	47772.8	71587.9	257797	63308.6	32962.5	36692.3	70546	67459.6	38902.4	35687.2	23046.1	84396.4	5905.26	1628.18	15771.1	2526.14	70422.5	39351.3	264017	20309.2	7930.08	28371.5	44435.1	34612.3
12.426_253.24037	9872.33	9905.37	5886.04	32969.4	7289.42	38921.7	7212.61	20109.4	51854.5	10219.6	7255.99	21820.2	31525.3	29728	11798.3	4514.33	4141.15	4743.34	960.271	816.279	3076.06	767.43	2332.18	1176.87	11527	3861.07	1100.26	1398.39	6675.55	1559.35
5.155_522.12706	2212.56	8663.94	1071.95	14908.9	392.958	3467.2	3459.16	12064.8	7961.64	10491.8	2248.46	1690.43	2067.43	11168.4	2208.53	7622.58	2599.15	628.278	245.267	215.544	543.074	224.168	285.775	5319.23	3884.99	419.65	322.233	5315.96	3857.61	6670.42
14.986_356.27117	630.372	8322.31	599.234	15319.2	1043.57	6920.6	3913.67	22635.5	6979.13	9163.39	9807.36	3086.08	4787.47	7745.11	904.799	7052.24	4757.16	428.262	2263.74	202.386	1567.97	239.437	246.828	3571.98	196.409	12195	496.269	271.381	3819.26	1206.72
13.803_477.26583	1398.1	809.332	649.275	521.346	534.794	4455.82	704.987	1611.48	4878.75	3964.31	616.679	775.009	2270.02	3419.86	2647.73	1431.84	1430.44	993.519	704.684	583.702	507.583	676.355	645.504	1070.28	750.685	661.438	663.015	1503.63	715.653	738.041
8.955_488.29964	1415.5	6967.5	2541.05	14851.2	707.798	66144.8	5973.85	15944	47557.5	7945.08	1637.51	4512.69	6900.89	18492.5	676.924	3254.19	4920.68	18617.4	742.733	739.865	730.186	739.202	839.067	1507.96	2088.02	1165.69	716.283	763.771	10572.9	860.93
6.905_275.04692	1055.1	2308.68	781.769	1752.06	762.34	813.942	975.49	1058.69	1035.2	2031.47	2809.97	983.336	814.84	657.099	2217.6	772.727	1122.3	939.175	1099.4	880.545	1331.8	702.774	1151.56	1448.55	937.848	1115.57	690.255	785.779	1063.41	919.798
0.728_514.00033	1772.5	8452.29	5981.69	21494.3	4063.18	8389.76	3354.79	3151.79	303002	6081.88	11411.5	1097.72	3132.02	8130.54	7607.14	8031.37	7342.21	23700.5	3907.8	3463.3	2364.95	10620.5	53096.5	16076.1	25395	10904.2	11865.3	4647.92	15077.1	11564.2
13.642_337.13767	9195.65	4828.43	1204.49	11633.3	1244.03	76164	18241.5	112633	16360.1	35973.9	1665.23	17616.8	22569.6	70847.3	1577.29	31189.5	23235.1	150789	10296.7	1167.58	1243.16	1208.76	16975.7	3224.25	200745	6179.14	1494.51	1346.21	33456.4	11459.1
9.698_270.19408	17318.5	66473	27342.9	59623	7638.02	300537	32819.5	137260	4435.97	80131.5	3656.39	28286.6	116226	148319	9670.18	3605.87	4618.08	51505.5	1022.81	920.063	1485.26	912.548	1563.83	1649.38	2684.31	8202.12	1036.3	2111.43	1088.37	1757.84
11.344_197.178	22809.1	13537.4	12818.8	12451.2	12103.5	12886.3	14031.3	13920.8	299938	13681.1	11430.2	19463	14470.9	11254.3	14552	14161.6	10632.1	11854.6	18862.6	11092.5	8953.75	7147.35	30954.2	17893.1	20494.9	13931.5	11710.4	17686.1	10817.8	15066.7
0.749_561.92221	45667.9	46981.5	37278.4	172521	26355.8	108873	43251.7	72567.4	119432	54224.4	19386.4	36343.8	73437.2	63850.2	25426.8	23700.3	14789.8	59952.5	1903.03	374.546	7871.66	506.145	35307.4	23087.5	275393	10677.2	2587.57	20979.9	37189.6	22601.4
15.425_525.28536	32283.2	17875.8	14054.8	66194.3	20850	25728.3	10469.4	19927.8	163067	22472.9	35347.7	11535.2	23967.8	19438.3	38724.4	28707.2	34967.3	19795.7	42105.8	18001	60650.2	108628	137398	61716.8	52413.6	18133.4	41321.7	32296.5	173012	42485.6
1.088_290.06253	4896.05	19054.2	34368.1	12668.5	6348.68	15025.4	20005.5	23324.5	173568	13342.9	19925.1	17630.3	17514.4	21151.3	23747.1	7204.73	11841.3	5063.74	3556.18	3035.81	4300.85	5555.48	2725.94	2044.89	4829.46	11050.2	3969.35	3234.22	4336.94	4581.3
16.926_420.22487	38647	26698.8	17090.1	30484	22327.4	19391.7	75286	31686.4	135269	25731.7	17156	42930.9	22070	13697	17287.8	14554.4	19583.7	14256.6	45920.6	18752.9	15303.4	17132.8	19151.4	24998.9	18086.8	17310.2	12581.3	70900.3	11967.1	25673.2
9.623_228.13354	84378.5	82614.8	79252.5	46580.1	45723.9	59833.5	106120	94944.5	105865	52650	65229	58944.7	52516.2	82547.9	79132.4	106384	97798	28352.9	91745.7	93549.9	134895	82820.2	241914	191299	121600	95250.5	84679.6	145342	90134.2	138747
15.214_447.33451	8327.04	6128.11	8519.21	6899.66	13122.8	1932.63	4154.2	12842.1	4059.46	1827.48	10501.9	20802.5	2253.95	3659.39	4267.88	21978.1	68284.9	60941.4	6028.59	6857.5	3959.13	30415	37403.2	3574.17	53630.8	46556.4	11923.4	72933.2	28449.4	16098.4
7.562_312.14703	6143.54	29081.8	14175.1	27973.1	5303.41	7601.46	18586.4	2140.2	291208	26005.4	9515.2	18790	19421.7	29185.2	17896.6	9416.14	9531.1	32178.4	785.986	446.423	1416.53	1771.76	24018	6484.56	1239.88	24473.4	6355	6244.8	18188.4	5065.35
12.234_331.18132	166508	73831.2	160653	9752.34	157594	125732	59083.5	158583	1250.73	76124.8	12122.8	141606	290358	93071.2	26897.2	16744.5	22078.6	40908.8	7861.18	969.693	81141.7	2247.25	912.665	27810.1	6493.22	16662.7	4537.27	5567.16	1154.34	13191.2
6.422_293.05759	1108.32	1717.48	1033.82	1072.18	955.577	1678.81	1036.3	1698.78	1089.55	1859.33	828.356	1031.7	1022.97	767.431	1154.16	863.673	938.73	1073.64	738.232	965.627	1811.69	854.132	776.507	823.618	887.716	851.354	1088.91	816.959	1472.54	1029.13
15.424_557.27891	27956.8	21950.9	14573.4	40110.5	19869	34214.9	17319.2	30193.6	12315.5	14279.1	27678.8	18536.6	20752.4	17653.5	20465.6	34156.8	20730	9871.51	38125.7	30579	46399	26641.5	39174.4	55297.4	15883.9	52049.9	29844	30984.7	36569	35856.7
6.97_295.12772	396.829	248.412	325.417	570.37	201.848	258.903	234.742	737.121	559.097	276.762	533.12	255.939	418.985	265.456	184.73	886.004	190.719	233.993	213.414	317.177	202.426	235.284	205.94	209.304	370.472	641.501	277.17	221.856	217.91	493.024
2.165_341.05362	15620.3	30095.8	62304.9	29505.2	18649.5	29429.9	34002.2	57099.3	40159.5	34796.3	28780.6	37887	33103.4	35591.5	42559.2	6212.92	20536.5	8337.72	1709.71	1384	3999.03	2110.27	4567.5	10765.5	27607.1	27955.7	3805.72	6220.14	11345.8	8990.53
12.863_210.07917	33335	34883.9	17987.5	28638.8	18779.8	135381	16641.2	58171.8	5122.16	23734.1	14007.2	24035.8	47485.4	18326	7446.79	40343.2	19149	18715.5	27246.7	25536	131287	18069.1	55135.6	109110	29915.4	38243.3	39978.9	50731	47622.5	65968.5
22.292_337.33406	19595.6	12911.5	6751.61	3838.29	5888.23	5193.69	5800.47	18435.9	11628.5	4052.36	7556.07	6466.87	8447.89	5917.24	5464.96	8932.92	8139.36	7361.06	944.087	11426.7	5451.38	7955.49	5654.25	7335.83	3852.38	6666.52	6093.45	4125.86	6662.24	7347.88
9.993_332.17322	1751.24	6812.76	1462.42	857.398	2008.99	9379.2	5403.2	12927.8	414.405	4018.24	4078.74	4916.09	10424.2	7899.87	1250.78	8881.98	5566.58	11686.6	593.778	3970.94	616.347	3444.6	4460.34	6714.58	12316.7	11331.7	549.062	362.158	5046.98	3974.37
26.03_592.43142	705.468	383.139	456.683	422.803	566.074	566.161	375.927	2587.2	529.851	2956.16	382.541	1652.42	321.464	397.474	705.7	428.675	816.141	317.937	606.658	382.943	609.491	385.894	1140.9	375.383	313.923	818.617	374.73	1963.33	346.997	489.358
13.929_395.30312	2233.02	4003.78	16237.9	23253	7364.29	16024.6	15125.5	18750.8	2371.67	7691.02	10253	18421.7	12005.4	12576.1	2258.8	56444.3	108195	49754.8	7636.6	13011.7	10226.3	28225.3	39264.9	2894.22	70048	57919.8	27385.2	45652.9	66083.8	69922.6
0.752_577.89627	55791.8	30381.7	26488.7	133127	19761	99881.9	41825.2	81951.7	21701.7	46249.7	10218.8	39058.3	79631.7	46217	16213.7	13004.5	7855.6	35042.9	368.11	317.524	3787.97	321.391	12083.3	12609.8	240003	5145.17	547.449	14184.7	21366.3	11742.8
6.021_163.08576	579.96	487.667	506.118	522.684	483.194	505.724	439.099	424.788	543.891	423.039	401.836	362.623	414.349	395.986	387.568	481.813	383.879	380.632	426.626	407.78	383.185	370.667	429.238	461.713	405.195	494.507	380.339	414.447	388.284	431.33
5.455_129.05783	699.053	988.673	664.466	1105.06	538.188	1118.58	462.796	576.569	279702	750.899	469.272	476.332	460.826	446.798	428.305	464.161	411.475	424.807	417.656	410.829	439.097	454.762	560.138	528.575	441.216	463.518	484.272	428.733	435.689	597.502
0.941_190.01539	117383	84181.4	78295	56040.6	75132.2	65741.2	54489.5	112051	15272.2	77202.3	64189.1	81462.5	92383.2	57102.3	81147.7	61890.1	53234.4	39587.6	52662.2	57005	64138.3	55936.9	83567	105084	3421.91	76923	76209.3	131807	68654.3	82360.1
12.769_343.27179	9890.45	4354.54	12543	34906.8	7514.9	24031	8528.95	20871.3	9409.4	21765.2	18047.9	24149.1	50333.2	21802.5	7451.48	130845	138419	85523.8	32178.2	10771.6	10655.9	57071	64879	12376.5	100394	79479.5	24720.6	59546.4	38459.2	73572.2
11.537_309.16066	465.414	372.369	365.409	422.184	436.602	73093.9	461.564	9626.58	8909.86	9214.79	387.588	400.28	2593.74	2166.77	383.038	529.958	420.465	190356	432.226	378.024	382.389	383.854	495.498	507.587	176260	507.739	493.628	507.931	602.086	3696.07
27.085_540.11374	10017.8	4120.04	7576.03	4551.07	5183.17	4729.22	4542.16	4535.51	6270.91	13226.7	7891.31	10210.7	3573.32	10668.7	4001.86	81997.1	28644	19430.8	22377.5	14120.4	18368.4	18257.5	273251	166541	117294	107440	77289.2	79438.6	120835	141085
0.742_545.94837	29288.6	38094	33998.9	128880	22505.1	70429.3	29218.6	40603.5	272977	38210.5	27038.8	20104	39852.6	49386.3	26156	24147.8	18200.9	63635.1	4188.02	1269.59	10102.4	1457.83	55982.3	30226.3	180543	16222.7	7917.96	21353.2	38067.5	28561.2
1.413_173.98407	2211.39	16480.8	46474.5	41679.4	7482.51	65521.1	7868.57	13310.3	3365.92	18654.4	57814	21932.4	49999.1	12672.3	14016.7	11205.5	24017.3	9978.82	44115.2	7438.5	89361.9	11403.4	157556	25498.6	33756	19772.9	19435.7	13635.9	39523.1	49324.2
4.875_316.99556	1053.81	1107.93	878.169	52506.7	904.671	784.783	738.13	752.925	1690.02	727.681	691.301	701.899	606.153	614.261	616.99	753.23	4104.72	820.573	890.333	642.454	6677.07	798.343	2197.07	272137	1220.43	43135.6	610.34	10727.5	76522.7	1168.83
1.115_257.0575	39329	71740.1	24274	67293.1	45944.9	89121.9	27381.1	95590.2	6516.41	169950	91499.8	39992.6	28215.9	75790.8	57361.2	98959	140993	149693	74804.1	96265	50250.6	126408	154583	95262.6	2021.9	112624	102819	219300	123345	112403
14.022_553.24763	283.677	214.541	253.606	357.519	452.498	300.725	422.771	574.316	470.413	333.103	533.147	311.425	376.932	277.276	268.724	441.185	662.902	327.621	1096.49	273.481	331.837	298.428	416.858	602.165	353.958	373.512	524.686	402.03	337.055	419.36
10.111_218.16691	4794.87	34341.9	8903.06	12735.9	5665.97	62110.9	5165.41	76091	16723.8	29083.3	6819.08	16546.6	25294.3	19230.4	15630.5	33243	26509.7	13115.2	14173.8	15485	18069.2	14473.3	29457.6	4848.22	47026.1	14500.3	7953.39	25363.3	71959	36851.2
0.904_199.0548	63892.4	85609.1	34818.8	216243	29747.9	39057.1	28041.2	28776.6	268155	15868.3	11874.2	20333.5	21395.9	13993.8	11257	3899.87	1859.1	5719.84	3024.74	5253.02	7162.16	3627.66	3891.93	5006.93	10074.2	3806.94	6160.64	3697.15	7377.08	6045.28
1.708_123.03209	30424	33671.9	41584.5	85909.5	33782.6	54604.6	35172.1	44960.6	21995.3	44885.4	33754.4	51718.4	94114.7	40734.4	44494.6	2139.12	8600.45	3061.66	2313.78	1873.47	2330.21	2186.62	2280.56	3498.95	6338.54	2260.79	3419.2	2477.11	3997.98	7607.3
14.327_579.26877	292.55	316.748	821.07	368.181	357.213	317.118	352.305	400.242	339.762	275.147	334.526	608.598	453.239	860.744	299.375	347.878	268.818	494.825	333.224	290.396	361.795	280.054	305.703	375.446	550.418	406.35	397.871	501.355	412.41	415.45
12.39_385.28243	692	4535.93	3996.1	33675.5	2273.42	45655.5	19221.8	40381	10693.8	15629.5	3909.36	7329.42	21042	17430.7	742.196	15762.7	57038.2	18681.2	2695.84	686.688	2292.41	1756.31	13850	1590.48	8882.26	6468.78	1655.78	9163.87	9845	12347.4
15.441_199.19371	108986	112191	83294.8	43801	72396.7	37708.2	59047.1	65244.5	56263.5	90845.5	73735.7	79587.1	83256.8	47610.3	47355.8	89064.2	48426.6	75226	65347.2	69005.3	62524.2	47302.7	87814.7	141064	102096	97484.1	78218.1	90098.6	64442.4	109139
8.963_788.44316	558.887	487.509	482.079	598.413	441.903	528.002	452.633	506.577	262659	445.493	403.208	655.75	443.784	508.477	400.608	496.52	448.089	474.189	454.172	400.385	429.221	456.532	545.905	499.57	478.371	490.801	446.756	476.849	506.553	537.508
5.454_131.07349	729.554	673.848	752.284	958.544	561.671	1079.55	1026.69	735.189	261876	1056.21	489.747	713.914	468.154	466.293	446.993	484.414	440.312	443.342	435.879	428.755	458.256	474.605	851.039	542.817	526.473	511.416	505.402	447.44	454.7	490.358
1.158_260.12332	143098	120529	123353	110958	122731	149043	166267	160141	2806.62	86873.1	82158.2	154737	169287	135641	124078	163642	110261	138240	120142	122892	112940	116341	95472.5	138770	1878.89	90491.3	200814	180398	147268	124382
0.729_349.99397	5414.26	14055.6	11032.1	26271.9	7763.79	13909.4	8322.22	7684.67	260647	10098.6	16732.7	4221.49	7423.8	14313.3	11489.2	9995.98	9908.6	26000	5996.58	4731.01	6926.25	6395.32	49704.5	17564.2	34981.4	12622.1	11731.7	7258.65	17864.7	12913.2
6.689_162.08267	823.136	838.721	733.518	807.712	704.854	693.451	630.14	610.298	902.039	590.839	577.594	593.65	591.476	743.717	539.402	789.263	631.62	616.682	647.133	585.837	636.168	555.555	616.653	624.062	560.372	680.217	856.924	630.78	614.339	621.733
16.031_282.12046	817.349	675.162	371.273	9165.21	862.438	4594.54	1423.54	9402.63	255.549	2470.14	930.959	705.549	3653.55	3558.77	281.343	2795.16	216.843	756.099	4015.04	154.833	187.913	832.998	4023.21	2343.84	320.404	13996.2	171.001	173.881	1807.32	7042.44
10.778_215.18836	21664.4	12637.2	12295.5	12327	15414.4	14738.7	16446.9	13766.4	260402	17024.1	16691.4	20052.1	22044.5	20128.1	20062.4	15527.3	10101.7	15614.1	13834.9	10526.6	9427	11121.7	24647.9	29140.1	24067	16568.4	18461.5	28449.8	13589.3	20476.3
14.202_345.16059	1022.93	18200	1065.13	1073.31	923.365	35453.9	2083.59	259890	756.585	1689.49	2009.32	19119.5	17822.3	15863.8	859.737	4277.14	994.063	82705.1	684.334	699.457	779.931	871.719	4091.68	2563.78	197748	1451.94	1206.94	2476.63	81621.3	9625.22
14.967_380.25349	79831.3	69188.7	138428	48216.6	102918	39044.3	49724	49933.7	104435	34804.2	79036.7	102839	99696.3	114384	5486.24	14657.7	9989.79	9123.37	17915.7	5256.8	39101.6	18294.1	65320.6	18471.3	115676	259830	18405.4	18083.4	8125.5	174589
12.386_312.19095	51772.2	14133.4	23247.1	16368.2	26037.5	15385.1	21243.8	20729.7	44981.4	12838.7	54809	14671.8	53613.9	25047.3	37141.1	62474	47036.7	33160.3	47927.6	49556.3	89255.9	53608.5	131650	104656	59542.1	62641.6	69040.5	88876.1	128815	173162
10.81_295.08266	1466.86	2339.61	1338.04	1277.19	6280.97	40939.6	3176.22	1584.23	1552.65	8588.31	1131.7	17965.2	36437.1	5277.12	1883.47	56105.7	1983.12	6778.15	15608.5	1141.59	1202.31	1547.41	1532.26	19897.9	2558.27	6727.55	1302.95	1300.4	1337.11	6346.35
7.125_135.0684	3751.45	4183.72	1953.75	1845	1996.41	2817.71	1606.13	4410.87	1665.82	1838.68	1925.16	3318.22	2955.21	2168.75	1112.26	4522.28	1635.69	2175.41	2954.9	3095.26	3274.62	3436.82	6567.44	9040.69	12820.8	4898.52	4171.85	3927.25	2521.36	4789.74
7.582_343.24667	6875.44	19211.3	7739.77	17981.6	2922.83	78518.3	10887.8	66057.9	31112.8	33193.9	4054.08	10154.4	54342.3	91606.9	6528.46	6030.54	13981.3	69008.3	837.723	872.049	993.522	855.696	5232.01	971.993	34568.7	6719.33	895.378	2296.07	6261.98	3238.87
12.107_371.10756	2460.73	10158	13368.7	19820.4	1822.54	3007.92	13456.8	2427.98	4355.86	15722.8	13514.5	3572.4	2776.28	2778.38	1960.51	10268.1	13323.1	4204.23	2981.03	2356.93	2479.71	1917.63	63051.5	4070.17	3462.96	5594.57	21497.9	8818.11	254823	30859
13.8_299.28206	2661.32	2666.48	1277.96	16193.6	1069.05	12343.7	2276.04	7658.62	38836.6	2740.66	1118.58	10183.6	17628.1	7786.84	2080.35	1328.66	1152.36	3560.94	1278.21	1530.19	1200.92	1522.36	1578.78	1642.58	8194.21	1726.85	1202.62	1998.21	2300.42	1557.42
11.871_309.16065	1577.8	3346.07	21640.6	38496	2225.45	1275.1	19149.6	4001.25	17547	856.128	32401.7	11977.5	709.535	1069.66	955.333	8190.86	7575.6	190356	8098.38	569.786	513.9	474.729	84594.4	1360.11	788.552	2219.42	3131.59	13832.3	253765	51438.1
14.468_336.22733	1966.48	3247.64	2142.87	14983.5	1409.62	5215.62	3737.56	8633.25	7591.92	1671.06	26528.6	1521.67	1577.34	1562.41	289.674	848.928	905.174	537.752	892.353	761.972	528.564	289.73	632.853	1032.26	773.684	4607.45	1517.58	347.067	1139.82	421.513
14.469_296.23485	1352.92	1804.71	1131.63	10627.9	2629.31	1496.24	2424.75	5560.02	7931.35	1860.51	19084.1	2358.62	2593.2	2531.58	1944.97	3237.69	2474.81	2096.52	1232.33	1619.21	2244.02	1494.09	2642.68	1589.76	2838.4	3960.03	2587.13	1397.46	2345.96	2335.77
14.346_347.11386	72846.2	77401.6	110712	67230.1	21482.7	121314	95707.9	19429	22098.2	99424.3	4476.34	138542	249036	251113	11318.8	121753	25269.7	45011.3	11595.7	1319.07	2960.33	2905.39	9449.36	6088.47	14636.3	4824.75	1714.38	5262.02	4699.3	20307.5
14.735_1120.58034	4261.32	930.11	1034.19	1954.83	2027.33	1121.39	749.309	1272.97	451.172	970.05	1788.09	1502.23	3132.76	573.025	688.406	8111.42	4960.35	425.258	4178.18	4022.96	16455.3	3072.4	11832.3	11311.3	916.259	2574.14	4458.65	1593.12	8585.78	8961.13
7.539_219.08936	71784.6	136385	61928.3	5788.1	39044.6	152893	62886.1	250826	940.469	116774	90823.8	27299	124819	80277	59460.3	25706.1	13332.4	27993	10289.1	7949.2	50896.4	18816.5	85113.6	58614.3	24133.9	16476.2	16172.6	43105.9	93984.5	50700.9
12.038_365.25627	1192.21	910.823	4474.71	18507	21049.8	3795.22	2141.23	9332.36	3616.38	5256.28	1022.88	7621.99	1497.67	2343.02	1101.74	23639.7	22690.9	12774.5	2138.31	1141.92	1637.93	14450.7	7794.19	9373.81	13817.3	31731.3	1605.65	3767.34	13622.4	34431.2
9.217_488.29958	644.383	683.342	485.343	1634.33	495.14	14926.6	952.55	9691.59	47604.3	1607.88	487.329	519.51	1970.52	3467.57	472.891	637.781	6264.14	47948	504.48	475.139	500.38	479.874	1570.67	602.266	31284.1	556.129	505.137	542.983	3568.18	560.973
15.594_583.32739	403.468	359.126	439.504	476.935	586.219	631.273	452.654	652.29	442.541	423.737	472.439	393.257	378.132	502.443	342.039	748.149	338.55	801.477	491.807	515.016	497.084	322.823	513.405	393.236	547.242	494.595	388.644	462.495	398.82	443.734
10.951_329.12932	1871.19	5020.81	712.128	5387.44	551.503	2200.33	4580.47	18815.3	932.164	8832.55	720.746	4215.77	9444.54	1505.84	504.328	2385.05	1130.86	4821.67	576.597	599.192	585.851	509.412	5840.13	715.614	1943.38	734.753	572.58	1756.52	952.487	6504.96
7.112_342.122	7729.69	26076.8	10017.6	13322.1	7207.32	9209.95	6846.68	23576.8	16633.7	19651.7	8194.06	10799	17528.8	21298.8	10666	31495	34675.9	6998.35	23313	37789.2	35728.1	35978.4	31382.3	13322.9	7352.87	49314.5	40276.1	45308.3	42160.2	46433.7
0.739_381.94179	54169.4	59523.9	50894.3	166318	35954.7	117646	56015.2	88289.7	174404	66563.9	34345.7	45864.5	84931.2	75535.2	40215.5	31763.7	21625.9	72803.9	4520.74	1924.24	12297.6	2669.57	54668.2	34033	245344	18618	8277.98	25970.8	40677.1	35548.1
15.13_319.18132	22806.2	74771	96498.1	107178	15740.4	230702	27672.5	161459	8647.35	44192.2	38024.8	206920	67286.9	30530.9	11831.7	86218.3	34341.7	203647	122475	1139.22	3579.27	1366.33	81724.9	19534.7	90313.2	47591.1	2163.69	10267.8	66976	31946.5
11.337_470.17604	752.271	813.907	6178.1	14320.6	270.527	809.183	2532.01	2647.41	7781.09	947.756	297.377	5523.24	5304.02	1547.47	705.285	415.662	900.069	824.478	343.959	298.831	398.572	288.163	360.071	574.252	555.411	388.918	296.601	354.189	398.788	474.669
11.107_378.28781	1243.67	22274.7	4756.1	25143.2	1461.19	63534.8	11357.1	38074.7	21683.1	20006.7	4767.22	2810.66	16436.2	25786.1	857.881	24144.5	14326.2	24263.1	966.265	918.338	943.245	921.832	2373.7	5533.98	30661.6	5495.08	1080.6	6932.08	31773.9	11444.5
1.99_152.0334	19637	29035.3	19151.6	18138.2	8566.14	33055.3	14923.2	50262.7	32603.9	14489	45963	14478.7	39639.8	26940.2	40037.4	7189.18	8317.18	8648.19	18876.7	2171.79	18009.5	17449.2	54033.1	34231.3	24068.8	12672.6	8804.94	23725.8	15376.2	17161.5
13.311_369.28749	2985.68	1944.97	6281.52	12605.6	11451.8	12391.5	4957.63	7676.84	3831.84	9518.87	3767.24	6754.93	18463.2	5805.81	4119.06	77826.2	32033.2	29039.1	11165.3	2233.15	8124.23	26450.9	27216	11216.8	85934.4	21276	7816.46	6358.89	43260.9	70168.1
13.675_413.31374	6616.69	16729.1	4714.03	24286.3	13878.4	45451.8	27667.9	66633.3	8914.87	29803.4	9116.62	21636.8	36531.4	15327.6	1051.56	37151.5	31630.7	34164	15704.6	11535.3	13404.9	5132.59	21944.4	26663.5	24894.3	43163.4	5089.53	37151.6	20508	61586.4
12.558_428.20961	883.168	913.636	854.25	964.127	647.402	1132.13	800.96	1242.66	906.965	884.782	752.37	817.543	1064.31	988.797	705.107	991.013	931.591	1252.8	802.161	602.158	673.057	791.778	1251.2	934.394	1361.86	906.516	776.76	1066.95	935.056	1118.36
13.781_294.2192	1779.88	1502.8	995.191	6332.97	875.697	3277.4	1612.94	3954.56	1857.63	1315.66	21169.4	984.207	1410.32	2033.57	914.472	1271.69	1463.95	1429.9	2377.87	1364.4	1345.63	1631.2	2002.08	1672.17	810.136	3262.3	3567.41	2840.81	1147.86	1389.09
13.837_419.30319	629.698	762.557	1913.02	6166.56	705.417	1618.89	2006	4314.83	816.584	754.101	8298.73	1423.75	928.106	1161.01	1099.66	2435.77	10844.6	2848.07	1237.84	989.004	1042.06	2028.39	3532.04	751.749	6631.56	7894.87	1470.65	3927.75	5504.02	3743.57
11.421_380.1402	1176.84	1005.66	1014.71	1042.39	927.645	4908.33	1102.15	8026.67	2421.85	1048.26	859.254	1058.3	1132.71	1006.88	845.143	1617.75	1159.27	1455	965.659	1007.9	942.682	1011.91	1227.08	1244.6	2324.35	1276.26	1094.63	1374.24	1287.49	2041.31
6.272_278.16274	1717.55	1656.88	4350.17	7997.79	1841.72	15678.7	785.052	4583.38	238252	11099.9	3229.34	4911.61	5337.34	13502.5	6087.94	2216.04	3053.37	4601.81	701.418	662.759	661.376	659.47	6950.4	1601.63	695.359	3545.72	1069.83	711.029	6159.83	1325.04
14.529_479.30089	260.309	308.951	434.315	440.817	292.399	321.27	226.369	287.17	266.855	292.547	460.139	244.757	717.458	307.47	237.047	652.589	328.1	440.418	258.333	241.336	240.338	176.814	676.533	1218.43	280.472	419.887	368.612	323.085	367.319	463.816
14.508_242.14165	33973.1	328.667	278.885	245.875	984.683	354.718	13166.3	500.121	3758.82	306.778	363.284	273.373	486.279	327.091	275.587	652.345	349.038	468.523	299.635	231.537	255.675	248.794	355.591	2970.43	298.37	446.683	392.135	330.741	354.928	493.415
8.358_411.21541	1218.79	3805.68	1087.57	6983.02	781.408	16744.1	3354.57	6409.23	2432.86	3797.14	786.364	1825.56	4105.25	12162.3	2013.26	2036.72	865.828	3267.92	763.738	756.716	724.606	752.991	1242.44	884.303	3546.6	843.393	1415.57	888.244	808.441	1113.79
13.623_450.21849	520.539	615.99	642.257	648.808	578.934	768.521	813.508	792	694.219	717.846	516.415	622.837	868.189	717.824	694.069	829.531	656.744	908.902	747.074	612.71	742.452	721.908	676.551	843.092	855.121	942.716	644.502	793.934	799.175	998.739
10.211_362.12967	585.09	1220.26	1198.3	521.476	430.55	1173.37	473.003	855.629	736.865	2944.28	464.491	1250.65	1550.74	2175.24	1951.5	2957.52	474.204	875.311	490.836	945.051	446.303	442.875	918.73	685.847	598.657	1264.42	496.784	495.455	509.294	1276.36
0.745_397.91568	70563.5	40636.8	40326.8	140043	27884.8	115147	54705.3	101572	45311.4	50242.6	18709	49331.7	95245.3	58318.8	24540.4	20040.4	12434	46865.8	1731.8	386.374	6815.83	353.134	20271.2	15397.6	199195	11786.4	1613.17	19312.5	23467.2	19618.7
14.345_505.24779	511.664	523.639	359.589	445.778	406.929	554.754	297.496	416.812	535.326	328.512	857.12	488.483	472.004	388.253	521.663	435.436	378.229	515.311	2085.19	470.85	666.75	498.405	853.167	539.284	573.205	869.401	414.343	522.112	801.255	529.01
8.153_329.03876	628.272	579.921	555.638	559.969	488.156	623.675	480.76	521.52	722.796	506.523	454.284	463.358	481.923	473.102	490.536	591.29	473.753	465.907	473.966	498.067	460.929	417.982	512.095	523.562	498.381	586.451	541.14	470.169	534.601	564.239
12.3_191.131	26695.9	29603.9	26092.1	37045.3	22142.4	37755.2	24145.9	56248.9	55122	34427.4	26670.8	26674	44356	31080.7	21530.7	85247.8	42863.5	79375.8	48863	62999.6	60607.8	79840.3	230984	138565	182718	74184.1	90070.7	64796.4	178363	74225.5
11.654_537.2584	825.034	696.22	1249.25	705.244	720.716	1156.62	728.896	1243.78	970.674	862.218	732.814	660.243	2690.66	92963.7	647.669	914.315	879.702	1013.52	833.353	756.695	667.556	753.884	1050.45	1052.49	1514.55	994.189	772.302	973.074	940.782	962.776
6.792_226.11045	34826.4	56925.3	8993.77	21492.3	12738.6	16480.5	21022.4	20138.5	75979.1	39764.2	7705.45	27977.9	10815.4	13690.4	5360.45	855.767	2265.69	4703.73	4175.18	2072.68	41675.1	1678.86	4236.22	7848.59	794.851	1636.1	29878.8	6575.16	3082.32	7676.55
12.948_271.21454	15209.7	8108.28	7694.97	5637.78	7942.48	5380.04	8740.69	9045.1	229924	6989.04	5490.84	12224.3	8922.51	6279.71	8347.59	6641.25	4991.09	7065.82	11445.6	6429.32	5012	3520.42	12266.8	10754.3	8775.09	8403.17	7213.38	9855.36	4092.74	8017.7
15.877_300.20856	27203.7	21103.3	14554.3	18606.8	6917.8	5887.54	5310.16	24123.9	22292.1	3329.21	35807.8	5679.1	7511.38	10305.1	6349.17	25350.7	73489.5	23816.2	23655.2	23871.4	25892.9	16596.3	46661.4	106657	28080.5	36929	25551.3	77667.1	24544.4	65887.9
10.683_313.22495	3593.4	2885.96	7137.77	68980.4	12972.7	27424.6	6607.55	30093.5	10534.1	47357	4128.97	31261.7	44691.1	9436.87	3350.49	64251.8	67407.7	89331.2	16648	1336.05	454.116	1877.05	86271.1	31458.7	52910.1	32717.1	11352.1	5675.76	49216.5	139351
1.412_273.99993	14153.4	6767.71	13810.3	951.84	15234	5965.56	3571.16	2774.08	720.462	3912.42	3683.77	2714.23	3851.72	1313.82	4479.33	2084.96	3903.07	1604.45	2095.75	3385.73	31729.9	3112.36	4659.47	18204	1758.81	3113.89	6328.63	2441.58	22025.4	16453.6
17.265_278.15145	116511	136434	109902	91720.4	80084.3	108097	74187.1	114264	52215.7	66593.2	83879.7	76831.8	90909.4	56381	62286.4	143592	89154.9	67860.7	97723.3	92084.7	150018	105256	186428	228134	147519	134361	115559	121292	150737	130539
14.112_302.16606	5483.8	9019.66	4810.9	890.082	2273.94	21718.6	6911.41	4686.11	12461.5	10631.4	522.046	4070.16	5265.69	22455.5	4851.71	23239.5	3329.91	5626.79	4487.67	2888.89	7951.84	7364.66	10266.9	25996.5	1576.72	6896.2	4481.65	1462.63	6195.09	7247.55
15.508_605.27877	28478.9	14308.4	12628.2	43091.7	16383.7	36784.7	18169.2	37199.2	4375.37	12625.2	26089.6	11463.3	25536.4	12823.6	17711.6	42707.8	20871.7	12140.1	32128.8	20570.7	39243.1	25019.3	50765.3	57032.1	13433.5	32253.5	28016.2	26026.3	39410.8	41821.9
0.934_140.02354	3173.12	4564.26	2920.28	4093.71	2414.01	3517.87	1598	2277	3697.31	3546.14	2855.13	1185.11	2858.8	2472.62	3959.58	2825.13	1528.91	1248.43	2207.44	2269.78	3156.61	3204.32	3752.01	3734.57	452.505	2420.74	2091.35	2879.33	2305.44	2146.66
11.178_321.09834	704.965	618.16	798.455	640.041	624.091	4333.81	656.231	1041.45	743.785	627.092	637.828	735.35	1195.73	5478.24	598.358	1181.44	697.323	3586.7	777.696	624.325	641.258	589.887	842.898	825.866	49122	765.717	783.284	690.226	796.454	903.833
12.497_236.14107	1148.22	794.355	1638.19	3760.21	2007.46	2214.51	1289.36	7853.53	708.271	2469.98	700.605	1725.55	2254.23	2338.38	614.055	1839.69	634.939	2161.31	1105.06	320.717	511.915	770.84	2877.46	1474.45	2405.6	4781.55	718.009	932.696	3807.58	3186.23
0.738_611.97749	2245.15	10005.7	6244.87	25467.3	4291.64	8920.93	5072.8	5638.53	220769	7177.59	9707.44	2278.55	4362.91	10283.2	6465.91	8184.72	6292.65	22425.8	2413.2	974.193	4526.13	1074.63	38366	12276.6	33841	7755.66	5890.42	4415.94	13865.4	7887.1
14.013_368.30357	1648.12	14175.9	810.952	14588.7	1642.88	13276.1	7517.98	35489.4	9036.41	14324.8	2868.36	2120.66	4481.92	9173.87	1199.37	20857.6	9217.14	2822.2	2491.97	1284.18	1303.57	843.751	1764.24	4520.94	4314.02	17967.1	1320.66	5552.12	13137.6	6581.1
14.737_1667.91651	826.638	276.944	242.737	603.231	579.775	553.283	278.076	383.587	329.096	238.485	318.617	344.661	321.471	312.669	262.886	3286.45	290.335	310.193	2498.54	529.252	9785.15	439.895	3082.95	1997.39	496.92	418.264	1552	672.621	1374.4	4193.86
24.141_428.36498	83539.4	7373.03	22003.2	12534.7	14478	43624.9	29524	5996.2	5557.33	34990.3	46884.1	47593.5	67428.3	21283.2	18378.1	34977.2	21962.4	39861.9	39943.9	74373.5	63106.8	11808.3	166702	54397.8	55530.8	57479.8	48125	154904	44338	185576
13.011_370.13463	958.108	867.705	1104.23	834.763	528.387	2810.37	651.183	1597.52	836.132	926.806	811.648	978.881	708.779	2483.62	483.912	1040.94	1006.5	1682.63	585.903	528.823	512.063	486.188	2025.53	605.821	1454.65	756.848	749.352	716.108	1117.8	1850.77
10.92_270.14775	397.406	304.068	300.749	350.622	312.263	333.38	352.424	361.39	218601	674.216	321.178	298.875	327.613	308.419	302.176	398.462	329.07	313.527	350.614	322.723	368.984	278.264	416.937	413.342	390.093	424.397	330.725	317.793	364.219	422.561
7.669_616.39414	627.939	703.604	522.399	593.881	700.637	604.02	536.309	547.08	217973	510.555	465.57	461.59	486.346	491.467	475.587	682.152	535.415	502.926	489.015	486.815	510.78	580.899	493.418	565.394	516.627	503.837	520.828	705.899	566.55	528.999
10.32_294.13647	6431.11	14951.4	4745.01	44518.9	2293.26	37960.3	6722.73	16416.4	5483.14	13790.9	6176.76	4280.87	16263.3	19703.3	7024.84	16773.7	8299.93	5465.25	1033.19	691.536	3331.95	425.02	3732.5	7354.99	2330.75	4596.67	2238.21	4192.35	5172.95	5360.04
9.859_518.23371	95109.1	90310.6	122471	92872.8	84703.1	77477.9	70731.6	66347.3	93663.6	103739	82085.4	83013.7	84620	83718.6	86950	86215.5	96303.5	92413.8	88969.3	72153.4	75584.7	132361	181569	142620	212954	104411	168982	148020	135458	154969
11.652_357.09193	1084.54	16825	10408.6	181000	1607.09	50818.8	112141	85097.2	30620.1	58124.7	725.262	1042.97	24469.4	87163.2	539.994	33847	47840.2	59573.1	3457.43	630.894	556.575	628.55	59486.5	35233.5	1262.75	1272.5	8300.35	173116	77224.8	47758.6
5.516_135.03201	670.348	685.292	566.388	665.028	637.492	591.549	503.892	482.527	1811.38	457.453	484.069	464.717	473.072	460.872	489.111	442.659	456.52	438.202	430.826	405.081	474.601	421.92	476.191	495.879	470.1	445.133	470.198	470.679	483.177	479.235
15.429_268.1049	1163	1979.04	1398.4	9751.14	1759.71	10543.9	5598.5	39189.9	508.103	5831.34	2012.87	2674.17	6859.26	7661.54	734.063	3177.34	251.906	1363.74	3820.78	187.28	480.012	1026.19	4660.59	5800.06	764.177	15429.1	607.956	407.864	3088.57	11704.4
7.345_306.12459	398.613	415.858	371.907	368.806	342.87	385.636	308.263	339.729	382.554	289.23	276.313	300.706	311.856	293.384	281.398	311.671	302.79	312.942	298.178	277.069	311.569	298.511	297.83	339.382	305.825	341.199	304.374	304.813	286.341	335.152
12.516_376.05232	393.651	444.917	415.998	441.797	296.01	551.317	367.314	562.719	342.636	425.049	344.144	398.123	388.63	481.519	341.968	452.472	453.661	610.08	9326.23	290.181	326.149	275.11	431.254	455.026	665.226	401.905	421.118	454.728	455.349	544.612
5.719_260.12334	777.672	1395.85	1058.95	1444.32	778.525	679.292	1682.7	724.16	2063.19	506.982	817.644	1362	753.949	487.625	1083.26	832.186	1909.05	1163.97	612.8	923.194	1058.81	439.613	1209.49	1176.41	210705	1292.11	1148.79	1399.49	1182.17	1162.27
11.866_229.24037	15774.5	24244.6	17114.8	6691.74	11034.8	6764.11	6179.79	4278.49	24514.9	8261.99	9013.86	6619.52	12012.1	9756.5	3738.72	1419.55	2560.84	3625.36	2272.8	1726.96	11123.9	2821.2	8597.93	4650.65	1065.15	16175.3	4085.26	3478.85	2259.23	4900.55
14.725_597.23594	27524	12394.9	10088.2	36043.9	17566.1	10201.7	8300.99	12396.6	3624.06	8078.7	19389.1	10014.1	16591.9	8391.07	13742.6	36386.2	19300	7151.79	30533	37020.6	52336.7	27883.7	44452.8	51076.7	11764.1	20206.9	32172.7	24757.3	23966.5	40534.3
2.048_135.05454	13253.2	8908.56	5282.7	6995.13	7672.21	7001.38	5393.67	17016	52013.2	6667.17	3445.53	10210.3	5612.66	3221.19	6255.32	17075.7	13378.1	19129.9	12533.3	9041.85	5612.95	8594.18	19366.5	19062	47892	38457.6	9400.85	9107.62	12056	24100.2
14.064_394.22531	1122.03	2837.57	1142.85	839.179	1488.22	1430.36	434.33	1017.79	1402.33	455.475	842.073	1613.5	1481.6	1500.98	1777.64	86954.9	33824.4	54252.7	78174.4	80597.4	79363.3	53641.3	145990	145828	89798.4	115589	89816.6	93954.3	74139.6	130699
10.913_324.11808	89567.5	72900.9	91196.5	84773.7	84705.8	91938.4	66989.8	72416	80587.2	82472.7	75616.8	96967.8	69407	94324	98735.7	86545.4	117500	95929.9	102898	64926.6	67593.5	100166	208046	188325	167803	123599	144455	127603	128775	164843
10.663_284.25725	617.229	620.947	534.876	640.371	539.084	617.682	518.956	620.656	705.772	537.456	533.812	652.911	561.15	538.337	488.15	673.557	601.615	586.367	528.023	520.399	516.227	481.98	652.587	688.502	611.073	682.535	595.16	606.825	651.383	634.493
17.831_323.28203	176.207	443.236	275.676	14884	232.04	1283.72	1686.02	5388.27	1282.95	391.878	5296.73	970.06	354.271	655.451	96.1003	199.637	110.275	206.637	214.806	129.235	172.306	104.217	187.894	179.943	277.584	1941.06	175.304	320.461	211.233	123.057
2.869_224.01085	2314.76	1874.08	1461	1510.49	1207.53	1653.23	1660.16	3762.91	1081.58	2169.15	951.014	889.589	1531.99	1005.94	906.027	1208.58	948.643	864.673	1074.67	866.573	884.348	862.534	927.358	982.972	806.405	836.891	894.063	861.11	823.263	900.322
11.051_388.2433	46515.1	12384.1	12254.6	13750.1	17966.1	15084.6	13384.9	14071.6	192383	13057.1	39787.9	17407.4	183585	14127.4	16709.6	40708.3	18968.4	188243	41471.8	41914.3	43953.5	44912	61117.7	95825.9	53591.2	46721.4	48310.6	55272.2	92992.3	175887
10.201_199.57367	2217.41	5940.92	14849.9	9785.05	1209.03	11391.2	3045.12	5193.2	476.446	27058.1	2793.85	7824.39	17097.6	18787.8	10655.8	22820.2	7823.11	7598.89	1803.66	11308.5	4647.66	1136.18	7692.66	7096.84	3668.61	13804.9	723.841	2309.12	1295.92	9329.02
1.102_339.07431	11619.4	20325.8	5773.76	4609.48	2688.94	4477.68	10104	15469.4	6634.92	9927.04	2940.24	5026.59	5030.37	11490.7	4367.96	9040.53	864.26	6111.8	3580.65	4508.42	6052.66	1011.54	1653.02	3245.33	89126.1	6783.27	1675.11	10447.5	2373.18	10075.6
0.751_495.89298	53397.4	20838.6	23402.7	99375.1	23387.6	86949.7	39930.6	74672.7	9753.23	40305.6	8250.63	42337.6	69007.5	40477.7	12518.1	10277.2	6165.76	25490.6	348.742	310.181	2595.46	313.959	8359.07	7829.91	176990	4097.06	361.882	12353.2	14184.3	9816.89
10.843_390.05294	2480.03	3837.87	1767.3	61774.2	5798.77	12334.3	21297.2	27691.5	14497.3	1479.97	69111.6	2391.38	2934.1	1697.13	759.905	971.668	2758.75	1054.72	476.572	468.525	615.276	461.479	546.466	657.821	575.387	36149	485.772	542.104	1047.53	1236.01
0.735_201.96199	31719.7	38653.5	33637.2	94543.2	27246.9	64748.8	35258.4	49175.6	204318	40542.2	29655.7	30602.8	45684.3	47433.9	31224.6	30512.2	23626.5	64147.6	9039.65	3353.89	16202.7	4665.35	64476.6	38052.2	134898	21439	13282.3	22822.3	44787.8	29906.8
11.44_369.09197	1105.35	10280.6	11034.4	35964.3	1842.24	23723.4	19849.4	36669.1	10599.2	32112.1	5552.88	7433.84	2584.53	945.719	793.807	6229.8	6829.69	109972	907.002	946.68	885.421	950.446	105431	2891.26	5314.81	3200.73	9790.28	9725.56	203271	34572.2
12.256_180.11498	15338	16291.8	13051.7	42197	10603.3	32391.7	16559.1	29931.7	18067.5	17650.7	12881.5	14648.6	23544.2	17754.8	11231.6	22475.7	18126.3	22968.9	15293.1	14203.9	16198.9	17005.9	49955.6	39040.7	53963.1	27727.9	20183.1	20291.3	38941.4	24116.1
8.464_377.2311	580.076	686.099	486.595	5129.19	432.321	12677.3	475.77	4968.04	615.788	1520.23	451.694	1032.82	2774.66	7682.72	411.85	474.559	795.634	3194.37	429.72	427.349	410.141	408.593	812.181	515.378	3808	514.029	481.427	409.437	991.598	549.176
9.927_178.56827	9546.28	16391.7	6124.8	82533.3	1801.76	53757.9	5397.98	28340.8	3758.97	21670.7	7152.83	6650.08	30990.6	27103	7609.13	10454.1	5173.81	9717.65	853.327	369.196	4885.88	380.598	3218.25	6787.74	2703.11	7596.24	1767.94	2455	5838.67	5007.58
13.523_334.15689	25894.7	30329.6	19084.5	80150	34709	52030.5	35246.6	45796.8	10012.6	59191.2	12140.7	19200.4	36536.3	50646.2	11218.8	69141.4	23721.9	57027.5	17954.3	1831.24	23211.1	22784.8	42720.7	87584.9	36156.8	59977	22353.9	11015.9	29206.9	106287
16.63_294.2191	13709.6	16836.6	19849.4	16362	10390	13529.5	20093.9	15541.5	2206	3009.71	35723.4	11268.5	11249.8	5337.92	2582.67	3128.32	2193.99	2117.25	2555.92	3216.24	3685.51	1448.11	3580.18	8353.52	3521.53	5684.22	3762.69	2910.98	3593.9	2511.79
8.795_326.12723	19704.4	39907.1	32731.9	10155.3	16184.6	27543.5	20788	29255.9	767.637	27381	49771.5	48155	46796.5	42614.7	20404.1	199389	31593.4	8279.31	61880.9	46680.5	31245.1	48804.5	68770.2	182974	9626.06	101822	91284.7	53147.5	50860.9	95929.5
17.398_571.38732	142.291	140.212	127.721	112.374	108.383	146.692	156.078	118.675	117.422	110.949	103.392	110.038	96.9649	131.632	86.3874	1838.65	167.472	164.295	98.527	109.062	106.677	82.0946	103.771	89.2583	82.1536	237.952	88.2886	95.8097	174.218	111.462
14.067_454.22545	21581.9	18795	17219.1	15262.3	20443.9	22100.5	18940.7	12646.2	18335.3	13425.5	13056	14676.9	17815.6	14355.7	20359.6	141538	91232.9	112763	140098	161938	151776	134926	190491	196725	139242	177981	147398	146851	144633	176352
9.804_357.17186	6045.29	8425.43	870.455	6016.61	888.83	68827.6	4156.55	23565.3	1313.99	14119.4	865.463	1464.86	20921.5	44824.9	3243.31	34011	16116.5	6897.02	3365.32	734.661	745.19	756.11	953.024	2750.27	1858.41	1193.86	800.065	1429.51	2564.19	7332.56
11.352_313.06575	6812.12	31766.6	10043.4	37478.1	5871.66	69544.8	16904	32906.1	6229.29	25010.3	3508.22	31954.1	122365	21429.6	6117.28	185837	12004.4	29511.4	23671.5	941.27	1659.2	945.015	6576.74	30966.9	55726	15258	971.106	11435.3	3467.45	24843.6
13.68_317.13035	1919.11	10361	4818.78	23240.6	15056.3	20075.3	10654.6	34666.9	1708.26	47748.7	4965.18	3732.85	5424.61	5884.38	781.79	17969.7	9027.9	22059.4	2100.44	388.039	14795	7117.7	15694.8	111540	11583.2	28843.7	5048.63	3712.24	11834.8	116923
5.131_267.09651	14981.7	3097.49	15116.7	4467.09	54651.4	5173.45	5363.01	2243.02	107761	2600.48	4606.78	20135.9	3537.03	683.662	4288.84	8106.27	1900.15	4483.98	4640.01	82456.7	14217.2	18677.5	7302.59	7889.7	8122.05	9079.1	20533.1	5546.3	1889.18	2223.66
1.102_215.99455	69567.3	81337.3	83309.8	34376.4	56775.1	38733.7	19265.5	14596.2	12013.8	32411.3	48321.9	24300.3	41314.1	15474.9	39989.4	41756	61284.6	12459.8	44395.3	35053.1	23755.3	49481.8	35413.5	11868.4	26820.3	53590.8	27631.2	44769.9	73644.6	69587.4
18.444_299.28202	4322.06	7180.16	3358.42	15234.5	2462.71	23025.9	5750.29	17542.1	1111	3647.79	3587.31	2628.78	7257.89	13027	1296.89	6195.66	3926.08	8262.25	10129.7	540.632	3499.68	757.485	3357.79	2776.69	3548.56	18054.4	2504.56	4837.85	3313.13	7069.42
10.393_359.18755	3918.36	2879.52	1065.22	4093.78	689.762	25127.2	1080.43	11223.1	1761.23	5199.82	692.957	1196.69	11373.5	26599.5	1385.46	35750.2	13151.2	8652.63	4137.21	690.586	1111.1	802.965	2182.79	3532.1	1691.95	4760.57	781.379	1752.56	2275.82	6337.27
5.151_223.02684	12494.8	31620.2	6484.75	35163.8	3668.51	19482.2	16943.4	37492.4	23370.8	28419	10061.3	5477.7	11306.2	28098.7	11933.8	15357.1	15020.8	7976.5	3464.31	1849.17	4922.42	2622.71	3583.2	22230.4	18669.4	5856.68	2579.04	20839	16509.5	25484.8
6.255_350.15077	663.879	749.564	575.72	600.173	588.906	628.984	514.426	517.658	607.762	470.675	459.321	474.764	512.027	480.164	482.69	495.454	486.82	446.435	484.951	466.046	460.61	463.733	473.85	472.516	488.97	479.188	464.662	498.778	475.775	472.393
5.945_304.1494	33891.9	763.645	676.049	17998.3	642.54	23786.7	544.922	503.611	193148	25925.8	634.857	465.65	644.477	519.381	12656.4	37195.8	21552.2	482.095	506.605	488.149	460.394	16932.4	22610.1	30539.8	520.291	26901.1	48028.5	21867	22736.7	44182.5
6.841_268.08794	606.764	507.6	556.719	515.282	472.701	565.55	499.348	615.922	565.973	532.74	433.507	413.994	399.152	902.616	385.765	428.218	532.405	461.048	478.45	420.674	418.658	396.71	396.436	421.036	837.032	440.209	445.267	439.21	477.513	613.535
1.594_123.03209	23294.3	30132.5	27141.1	51824.5	31544.4	33001.8	24571.6	26714.2	4584.55	34024.5	18264.4	42972	33423.1	51708.7	41427.7	3647.72	4432.82	4472.87	4291.36	2411.24	4132.66	2594.61	5160.06	2770.11	4516.13	4497.35	3658.69	3782.33	3821.44	5914.61
4.877_320.04197	1054.72	1108.9	878.932	86960.3	1548.33	785.465	738.772	753.579	6570.7	892.097	691.902	1008.55	606.68	614.795	617.527	641.675	8568.76	1417.26	1674.17	643.013	10067.8	799.507	2584.11	191294	1982.05	74583.8	610.871	17786.5	131866	2552.84
24.255_366.32829	831.906	314.059	2179.9	872.866	308.592	1119.35	631.456	1044.92	1373.58	2471.56	212.082	2624.29	3931.41	256.063	884.735	1752.93	983.164	1110.68	867.608	809.314	473.9	1094.17	1388.92	2777.46	502.18	1980.43	271.026	2454.5	600.318	3524.06
6.904_293.05759	467.46	726.34	407.602	440.841	427.976	424.377	371.629	562.69	539.739	1167.35	1170.91	397.606	377.561	342.601	1207.96	402.888	926.85	391.646	943.673	387.025	639.64	417.722	577.082	1004.72	386.057	665.722	359.888	525.106	455.367	474.277
8.153_166.98631	320.583	295.912	283.521	285.731	249.087	318.238	245.314	266.112	368.816	258.459	231.804	236.434	245.907	241.406	250.302	301.713	241.738	237.735	241.847	254.145	235.195	213.28	261.302	267.154	254.305	299.243	276.123	239.91	272.787	287.91
10.532_256.25124	599.603	541.603	455.096	1227.53	492.143	584.149	487.277	553.217	776.53	474.801	473.951	565.104	516.973	520.276	436.935	619.711	543.711	551.752	518.856	478.206	469.301	460.147	558.779	752.85	649.931	618.327	581.752	508.514	577.713	599.132
1.119_236.07958	6939.33	6873.66	6596.45	10472.1	4918.3	7153.67	4069.28	7456.74	186145	5026.98	4342.36	4716.52	5788.5	6004.76	6583.89	5252.11	5265.61	4409.24	3976.09	4021.78	5135.33	3097.75	6366.48	5978.28	3116.47	4475.58	5129.87	4329.38	4625.64	5264.53
18.25_547.38725	354.079	814.903	314.689	3649.52	573.115	517.5	304.775	397.342	295.504	426.726	353.318	341.425	279.153	496.193	289.415	20671.5	3849.05	15801.9	285.588	322.846	375.379	246.986	283.216	1176.2	9192.17	4264.99	370.594	4375.43	14779.2	1405.87
1.116_298.08412	29790.8	50062.1	17940	46254.5	35735.1	64906	19817.7	68404.4	2269.78	123953	66322.5	31263.5	20528.8	55254.9	40648	76651.1	100100	104496	57668	73183.1	36761.4	88494.1	109424	70414.7	1032.51	81225.6	76223.4	147657	87446.8	79237.4
11.215_343.14491	724.032	894.191	445.802	944.646	452.307	28450.4	570.278	5868.29	805.929	643.902	462.263	448.954	3139.99	5438.96	433.658	543.522	575.236	547.963	525.258	449.237	446.461	436.412	818.459	578.886	185303	627.75	567.682	1816.32	2396.03	1904.76
12.232_309.12531	806.628	841.795	819.554	5755.09	982.919	1361.16	931.562	1290.67	1171.82	1321.86	735.792	1466.53	1556.22	1222.59	6063.08	1338.06	1109.12	1398.2	20837.3	658.542	881.419	2181.8	2128.18	1665.37	1395.78	24583.3	949.82	1129.67	1083.9	3418.89
3.207_122.04805	52549.8	117314	26311	137352	41321.8	60764.9	10297.4	99234	185069	13732.4	5448.6	70043.2	13915.5	45602.5	4859.35	4718.36	4328.07	5306.52	5099.99	2638.59	2167.77	3653.47	3865.07	12102.6	6885.78	4565.47	3192.94	5140.1	4622.71	20593.4
14.014_491.30101	340.543	265.005	265.842	441.615	558.935	371.461	522.216	355.412	423.086	411.456	658.554	384.678	321.895	342.496	331.933	435.76	313.097	404.685	808.351	337.141	409.893	368.625	514.912	743.807	437.217	461.37	648.104	496.595	416.337	518.003
11.339_357.09194	760.197	596.73	584.354	674.66	557.941	33941.4	825.469	55438	1520.47	622.008	510.357	627.97	16948.7	566.812	513.78	817.375	687.882	41248.9	638.955	555.124	555.194	535.306	2425.23	735.692	115082	722.474	617.02	663.877	934.09	881.77
11.714_433.25732	714.373	636.281	1871.66	800.243	614.95	2208.17	610.621	1022	878.333	1985.88	706.396	1986.8	5444.63	2224.05	705.11	24278.4	1047.42	6015.66	712.931	9393.56	1268.9	646.968	1006.37	4402.27	1319.34	9231.31	707.541	1462.87	970.109	2193.21
1.116_316.09468	36174.8	54882.2	16338.7	60851.3	37074.3	62347.1	26734.1	70767.9	2355.09	118139	64155.6	22924.6	22505.8	55915.2	45330.1	58575.6	107306	92825.2	58287.4	63999.3	31189.9	94143	96775.6	59226.8	1071.32	73369.5	69683.3	142612	84573.6	80253.7
3.646_114.04698	1229.59	934.427	1294.63	694.904	1202.33	620.16	858.801	900.997	589.173	716.116	543.007	566.121	517.012	808.755	374.444	458.001	422.053	551.316	378.943	383.162	730.933	382.74	304.4	595.323	305.544	447.117	602.363	765.233	534.796	835.155
7.142_348.10318	389.613	911.656	376.346	757.909	1011.29	978.281	747.778	697.57	343.395	369.756	528.407	746.812	950.04	895.292	332.738	597.238	398	293.058	260.171	362.071	259.638	340.76	286.79	290.637	585.395	312.438	672.358	512.762	617.757	265.548
15.712_605.27875	3138.55	876.155	862.737	2081.51	977.849	2339.35	715.274	1891.61	528.717	1557.43	1062.61	2308.39	1272.88	857.925	1953.94	1171.21	1712.68	430.877	3232.22	1136.34	1747.03	1223.26	2442.98	3391.39	1823.62	1665.88	2986.68	1777.59	2185.57	1581.63
11.7_329.25621	20162.4	4608.73	10903	15907.6	10876.9	43069	4369.96	24112.5	14504.2	15250.8	10866.3	7087.24	22279.9	29505.1	2790.93	20586.4	14732.8	17847.9	10770.6	795.325	7980.94	6460.79	29720.5	9410.25	5318.41	11613.2	4579.34	3789.51	22097	36512.6
13.781_334.21155	996.915	941.913	1472.13	6176.2	1136.82	3442.67	1604.96	5024.07	1749.51	412.787	21203.1	975.52	344.796	751.709	562.405	534.504	691.781	299.298	3426.62	1169.26	710.606	325.422	1085.37	4009.74	378.889	2997.37	1202.65	360.582	1364.15	4507.57
5.565_230.16283	22781.4	39899.3	21018.6	39510.7	14406	151633	23957.9	100595	106286	48056.7	8387.65	40131.3	63260.6	55815.2	9179.76	2579.48	5134.03	31594.7	566.459	531.127	1802.55	560.049	11107.5	2614.41	19509	9884.16	1210.59	1549.91	9022.27	2418.75
12.238_274.11543	4467.18	25067.3	5340.77	19466.1	11500.3	1225.3	4506.72	1161.85	33280.4	20477.9	727.639	11275.8	178960	1100.56	12076.9	85579.1	12556.3	1006.06	4635.57	592.811	664.952	624.87	18141.7	92321.3	1256.46	12767.5	1916.3	17960.9	1777.78	10611.4
6.657_301.19982	974.506	1002.96	924.383	1337.53	842.882	859.412	753.538	818.793	178470	763.239	795.409	709.902	736.453	740.193	682.385	763.354	761.718	744.546	773.858	700.558	680.298	760.667	737.41	746.269	3446.31	813.421	802.494	793.129	809.594	774.103
7.22_430.2246	719.661	790.408	656.615	599.124	564.572	623.764	565.075	583.919	790.982	568.41	521.949	560.848	529.602	569.556	553.939	632.786	571.348	526.227	543.355	491.802	518.857	552.363	527.958	622.925	563.948	579.666	549.995	568.075	528.379	564.882
11.409_304.17832	7229.48	42110.9	12487.5	23139.7	4118.89	177779	18888	84443.3	1992.97	41001.6	3608.66	9828.56	79605.4	89961.1	9819.1	3962.88	5869.51	35271.1	354.933	371.909	434.689	373.388	451.455	1086.05	1538.53	7833.3	383.697	806.68	1036.77	839.186
8.2_377.2311	1175.79	2797.03	1738.82	5645.65	659.56	43640.2	964.364	11769.6	2777.57	1770.52	789.075	1378.72	4905.03	9572.08	1856.97	2226.54	3618.89	20367.3	656.925	672.951	653.974	615.803	873.47	1020.7	9337.78	945.785	731.148	680.465	1394.03	765.114
13.521_349.12963	762.359	2910.15	1212.98	2723.57	1437.96	17431.4	1873.13	32706.2	1680.51	13637.9	586.355	4560.74	5610.97	1635.6	544.783	2362.57	3768.32	13624	571.727	521.714	590.566	539.368	3221.2	1221.93	40099.6	744.414	771.325	1046.84	7094.24	5324.17
10.839_367.0369	1179.26	3785.92	1375.5	41004.2	3739	10700.7	15430.6	22789.8	12183.9	830.103	52085.7	2205.91	1488.41	2714.94	1332.51	639.311	2258.21	672.958	626.484	518.418	646.184	510.622	604.659	740.481	636.659	26066.2	537.502	647.014	1415.12	905.371
13.519_293.13033	26251.3	34051.4	22219.7	93141.7	35776.6	58691.4	38057.6	48062	11365.3	66622.9	12598.4	19046.7	34051.9	58746.6	12978.1	70273.6	23816.7	58235.9	17018.6	598.74	25790.8	22290.4	41606.6	76952.5	32289.1	59021.7	20455.4	9652.5	25675.7	106158
7.805_495.23665	571.353	887.085	471.596	3921.73	443.356	11644.9	485.238	54465.2	1834.48	1378.32	562.948	414.962	4091.89	15547.7	399.22	1778.88	957.904	20414	419.67	410.639	423.058	417.054	419.564	493.185	15934.3	510.678	442.834	2373.4	2571.11	2682.29
11.344_340.16751	19502.1	10486.8	13472.8	9605.56	12648.9	7827.62	11880.4	7807.34	176552	10073.5	7892.82	15266.9	11001.6	7693.84	11733.2	10209.7	9725.05	11812.8	20813.4	10867.6	8112.25	6729.02	17686	16492.9	1060.54	12441.8	10913.2	17850	8336.51	12750.3
11.344_309.16069	438.993	344.595	337.449	389.598	317.864	58064	377.661	9626.58	878.029	359.193	285.836	362.635	402.296	327.319	296.694	445.898	397.233	498.567	368.979	320.569	309.48	309.124	386.263	424.842	176260	417.209	349.155	379.954	441.167	509.198
0.742_709.95487	2319.03	8685.06	7975.19	31017.5	4278.76	16476.6	6281.03	5878.96	176110	8484.04	6931.76	2157.99	5757.31	13490.9	6110.22	6102.11	3591.49	21331.1	860.279	462.413	3405.34	375.785	26980.2	9825.47	47226.6	5274.46	1071.12	4093.65	10993.4	7595.24
1.185_159.06839	1707.3	1439.21	1325.37	1998.08	1413.83	1356.55	1193.44	1340.98	176101	1278.52	1202.03	971.166	1145.27	1115.49	1178.84	935.848	1086.82	1196.74	911.637	1099.2	1024.71	1022.09	1276.3	1552.65	3053.62	1266.84	1311.27	1333.23	1752.02	1462.68
6.006_264.14715	1420.39	2634.87	1115.83	1007.01	625.921	108943	979.188	60934.5	115815	751.128	789.397	432.614	5421.14	2525.54	462.373	486.889	494.647	2548.96	508.97	486.486	457.144	430.034	795.59	637.752	2614.94	784.203	453.749	490.303	808.181	511.036
15.915_266.1256	956.065	1557.24	1584.55	18475.9	30052.6	8945.18	2304.67	14596	1215.55	6299.43	546.474	5434.6	1771.49	1388.47	204.285	3933.06	372.706	2271.08	1935.81	446.338	615.509	1980.56	3112.9	18188.3	1138.87	57953.8	849.56	463.612	2160.84	18983.5
7.796_312.14702	390.338	1094.68	436.199	594.669	323.68	614.051	354.256	377.001	931.713	421.215	303.475	293.315	343.246	367.697	285.229	349.482	322.438	349.304	431.717	290.816	308.861	288.419	431.268	442.626	306.914	354.583	323.299	340.619	531.371	337.168
9.737_226.16797	16588.7	18115.7	9545.09	174186	4342.65	113739	11747.7	47998.4	4213.65	31755.2	8340.69	10961.2	48072.4	65801.1	12457.2	5531.46	4983.95	9302.94	845.542	793.063	2773	671.549	2239.8	4328.62	3895.78	4451.78	1453.09	2716.25	3846.96	3052.75
11.381_333.22999	17351	7620.56	10408.8	24810.2	8831	10455.6	12914.1	17805.7	10059.7	7372.83	4189.48	32849.3	12720.5	8118.08	4763.38	2939.26	2555.59	3338.92	2132.2	5339.27	10625.2	5464.65	10109.7	14207.3	174122	15831.2	26758.7	21344.3	19109.9	14128.7
14.983_240.11001	12949	13712.3	7961.98	55307.2	21687.7	53852.4	14379.7	75604.6	3153.8	46823.4	3075.96	43388.2	58584	14603.6	1616.76	50849.6	2907.24	16804.4	25163.9	3046.54	6848.35	26421.6	23321.9	40482.6	7437.31	44211.3	8293.94	4399.73	8959.65	99619.2
11.667_317.12929	835.936	701.948	542.956	1046.44	585.775	123887	592.423	173643	995.786	6641.68	595.608	536.624	132081	50134.2	526.405	743.126	714.994	47423.6	677.323	615.018	542.568	612.733	5272.76	935.302	68207.7	808.045	627.703	819.839	13571.4	782.514
14.735_2209.23269	251.31	255.22	223.697	231.568	268.266	509.883	256.263	353.497	303.281	211.161	293.624	317.625	296.254	288.142	242.265	2050.02	313.79	285.861	991.957	487.736	7122.49	378.385	1657.8	2034.95	457.94	385.455	539.978	452.19	396.228	3129.87
14.049_255.18332	4866.32	387.118	1904.17	5940.61	1733.78	2021.44	1234.74	11569.3	2766.4	12084	776.481	5285.78	5714.04	3603.67	657.506	54795.2	3021.56	15765.8	4882.57	2122.82	1455.01	45872	4075.95	18191.9	8099.29	142466	2314.39	1901.97	2619.79	59648.2
12.292_556.21312	718.407	651.38	783.011	11647.7	254.622	851.164	2771.19	1345.64	5675.09	1559.96	270.19	1259.69	4673.17	2011.73	274.06	514.21	430.49	433.784	307.408	254.285	271.229	244.137	499.493	528.651	515.066	279.86	310.307	489.558	479.501	478.567
16.904_294.21914	3130.92	3739.15	10258.7	7875.17	2465.92	10071.9	3015.4	10838.9	876.983	1460.77	24734.8	7904.82	6572.34	1314.19	6443.83	965.928	528.837	577.54	711.757	792.253	1301.18	488.759	1550.33	3746.7	484.059	1840.44	1123.04	1699.66	776.541	2459.25
11.183_315.08138	631.851	554.049	551.319	573.661	559.364	837.011	588.171	696.024	666.644	562.055	571.677	551.938	588.755	610.296	536.301	672.17	625.002	731.066	591.383	555.567	574.751	528.708	755.478	740.213	30099.6	686.302	702.047	613.039	713.39	810.094
7.616_310.09838	12687.8	22036.3	10405.3	18907.5	3056.01	66853.5	19134.7	21055.1	3031.08	43277.3	2398.53	2429.66	20741	92890.5	21017.8	49040.5	30075	8574.95	30482	2640.78	10493.3	7502.53	12476.4	74816.5	1056.04	5746.49	16646.9	6989.45	4799.44	35382.9
14.855_380.25349	48089.8	42141.2	83656.7	21899.5	81815.7	28232.9	32368	38037	65855.9	21315.1	53468.1	26627.1	58975.2	81174.7	3840.3	11146.3	6423.72	3554.71	8354.21	3995.67	24916.2	11825.9	35627	7656.22	88630	168962	13221.3	12068.1	3499.23	101417
1.114_158.04735	36174.8	54882.2	16338.7	60851.3	37074.3	70692.4	26734.1	67570.9	2308.92	118317	64155.6	22924.6	22505.8	50688.5	45330.1	58575.6	100470	88355.6	58287.4	63999.3	31189.9	94143	97178.8	59226.8	1050.32	66933.5	68292.6	140307	94590.5	80253.7
12.45_644.26569	72210.6	55979.3	70893	51318.8	66335.1	55318.7	50850.4	47549.9	59765.9	59298.6	60889.2	56103.4	51267.8	56851.6	66916.8	75056.4	79890.9	50681.2	60702.3	67403.1	73243.4	83334.7	145151	133946	90601.4	100601	107806	89917.6	109726	108983
4.364_274.06755	2721.01	6386.92	1994.87	11944.9	1006.24	2545.61	2587.7	5751.29	19966.7	5405.57	1947.73	757.643	3436.15	3931.56	1067.74	5114.37	3314.31	2184.19	697.097	766.772	2237.59	1148.51	675.729	8011.41	4301.45	2041.02	1634.43	4421.66	2721.28	7554.25
9.097_129.05784	734.933	489.879	854.774	441.378	501.617	1001.69	915.479	1060.07	1636.9	1315.98	375.086	984.588	353.547	477.93	365.262	1369.88	1653.53	1917.41	720.652	960.894	3120.13	1393.75	4388.13	10891.7	4278.45	4072.16	6626.94	1911.09	2366.3	2457.22
8.92_221.10499	1878.75	2590.94	3380.19	3561.13	1795.32	967.593	1844.29	1048.15	1978.22	1033.41	2635.6	1907.85	2085.6	1830.02	1152.47	1728.73	1937.4	2227.82	2106.24	1900.56	1903.49	2051.89	1612.72	1113.23	830.172	1247.32	1857.42	1881.35	1786.69	1001.44
23.371_568.44902	379.987	6132.02	706.943	6571.44	532.63	8536.62	1821.87	9823.4	287.924	3474.63	355.248	2424.57	6177.98	10452.7	406.571	6941.85	1103.22	2684	1188.3	290.726	1199.25	364.371	1543.34	6667.43	384.772	1219.75	297.845	966.696	1034.98	411.359
15.928_390.23784	330.036	832.644	1007.06	3038.36	475.021	1629.9	2537.14	2367.08	580.701	1973.86	5956.04	808.596	581.632	1714.44	871.359	111.426	248.475	238.656	190.336	264.239	155.861	213.322	407.169	1191.98	829.898	938.864	464.123	524.759	153.778	509.607
15.503_1110.66539	318.272	317.267	228.2	406.201	268.184	553.97	291.096	610.073	243.012	239.983	1012.13	224.865	357.234	220.451	404.569	562.157	411.037	249.844	1424.52	269.142	2986.35	345.126	1285.15	683.361	289.921	717.274	715.914	661.537	882.4	726.287
7.222_301.19982	711.014	780.912	648.725	3655.95	557.789	1044.07	558.285	576.903	164930	561.581	515.677	554.11	523.239	676.802	547.283	625.183	564.483	519.905	536.826	485.893	512.623	545.727	521.614	615.441	664.441	587.324	543.387	561.25	522.03	558.095
8.067_532.12163	1952.85	7138.65	1533.73	22262.8	778.698	40537.2	1529.46	15119.4	4786.24	13878.5	6905.47	352.927	13758.5	13033.3	2926.09	28074	13534.6	28079.1	5227.1	600.808	713.574	648.553	4809.51	11764.6	8271.5	3014.74	1175.97	12001.4	31653.1	11774.6
8.605_502.24594	319.717	300.535	253.808	286.481	264.81	288.423	257.085	265.643	339.658	230.381	247.081	226.685	288.626	277.731	224.873	310.568	271.969	260.917	248.147	225.907	259.95	240.42	262.313	299.051	245.99	272.398	260.392	269.01	253.298	275.75
14.309_241.13592	47728.5	54179.3	37372.4	45623.7	42176.8	38861.5	38368.2	43040.6	40007.4	47344.4	46662.2	43433.1	54934.3	39184.6	32783.6	56554.1	54141.5	46466.1	70221.8	66026.9	39472.1	53790.2	79636.2	141447	60744.7	64600.7	80966.5	71699.2	88840.9	55048.1
14.201_328.12828	13813.8	10325.9	13918.7	21159.5	19125.7	10366.8	28575.9	11308.4	36154.4	72571.6	11844.8	9612.48	22333.7	18799	25269.7	27068.9	35102.9	16427.8	9675.73	36526.6	37934.3	11802.4	66599.5	26023.2	20880.5	22192.9	28802.3	32604.5	28749.9	52215.9
8.921_355.21032	780.281	12463.3	1740.7	2444.67	662.635	15876.5	1588.33	3850.48	3779.87	1131.32	3084.61	925.722	8537.26	3897.56	2050.5	5765.46	1365.98	1918.53	7239.71	6937.53	4643.89	3079.21	2978.72	4832.14	1110.86	22056.8	5989.86	9516.39	1700.99	2630.31
11.533_367.23549	1926.81	412.715	2355.6	5763.75	963.213	7508.72	1816.75	32868.3	620.886	4028.24	645.678	14884.2	6698.47	2771.99	454.266	23541.8	9094.56	14801.1	6067.26	418.983	2235.86	13814.4	27847.4	4032.91	9721.82	7167	6657.06	2158.9	47866.4	28161.5
10.017_362.12967	620.635	569.445	470.133	510.216	476.954	578.517	512.474	1049	585.5	506.964	410.172	485.708	562.438	652.66	469.705	755.867	547.726	599.488	618.793	470.041	477.697	441.517	530.773	570.051	1381.93	637.331	532.209	501.159	551.277	613.105
0.753_643.92555	20509.9	21886.4	18353.6	77700.8	12836.9	48545.8	19280.3	30483	61394.6	26272.4	11712.6	15332.4	32103.2	31114.9	13748.9	11029.8	7546.27	33316.9	816.842	383.661	4357.08	388.334	22282	13961.1	141300	7282.73	1408.05	9548.89	18642.7	12067
0.748_627.95162	9303.22	18646.8	13654.4	54320.4	8715.87	31354.8	11801.8	15192.7	158865	18015.2	11803.8	7063.22	14101.6	23189.6	12602.1	12799.7	9258.36	32643.7	1582.92	685.092	5394.51	676.923	36155.5	15292.1	77830.4	8141.4	3132.15	9681.14	16914.6	13409.6
6.688_330.09259	783.114	904.73	697.854	768.441	670.583	659.735	599.503	580.625	954.53	562.112	549.511	564.787	562.718	588.886	513.176	617.259	600.91	603.564	615.669	557.353	791.672	537.288	586.671	836.314	533.126	1190.83	897.145	902.215	584.469	591.504
11.706_258.13658	29548.1	302.703	287.266	277.223	527.356	497.902	9936.19	391.737	1977.65	345.237	310.105	284.222	398.088	374.388	253.299	410.709	378.695	510.739	339.169	325.743	303.068	307.788	413.866	1603.78	536.615	453.366	336.605	325.469	404.989	394.126
13.366_176.0473	18978	12492.1	16598.6	14954.4	14197.2	13231.9	11170.3	16458.1	17768.5	12065.2	12456.4	16565.6	15987.8	10996.5	14466.7	50377.9	23825.4	34544.4	35309.5	46177.8	32689.4	67129.2	157075	135469	86187.6	34610.6	60544.2	21643.8	108816	25265.2
14.623_238.09437	48559.3	50749.7	17542.5	111403	26391.4	79966.8	76676.8	156931	15924.7	27882.6	12533.9	27409	106164	109106	10443.5	68322.7	4330.62	5277.73	3569.25	1163.17	7303.92	1320.03	9403.88	25310.1	3586.22	7792.83	12423.1	5478.72	5562.53	39610.2
9.99_186.0793	36375.5	12684.2	1955.24	5537.31	3021.7	11128.5	14632.8	8155.36	2299.9	6028.24	3568.41	2724.59	10937.9	9654.53	2775.19	1075.19	591.951	1764.91	777.63	477.245	1211.57	452.062	734.614	3883.37	653.302	1098.57	544.92	881.064	780.387	1029.87
12.124_331.14495	384.037	2255.41	396.853	76451	311.509	542.307	15762	68549.3	5269.17	914.661	372.827	5705.6	485.316	21694.2	303.802	466.926	9189.1	62659.5	361.331	312.737	302.235	378.745	31354.6	485.806	1216	405.057	491.64	31993.8	30369.3	23605.8
15.162_600.38494	211.671	263.661	202.833	304.461	248.805	349.309	245.577	324.129	156216	593.562	310.448	312.558	244.424	581.876	277.055	225.374	225.252	229.855	285.155	296.756	231.72	316.638	334.136	266.001	402.676	362.86	241.249	371.605	462.384	441.192
10.22_274.13487	682.304	626.678	513.42	569.522	502.087	726.596	551.594	611.894	741.234	542.82	493.938	521.504	506.235	530.009	469.053	662.796	590.936	543.134	572.39	549.707	520.457	516.459	578.557	584.556	638.334	680.497	579.326	616.393	546.101	657.811
6.147_260.12333	37946	25137.1	26126.7	17527.3	32566.7	27747.6	36145.5	33369.9	134582	29158.9	15400.4	35747.6	29194.3	35381.8	28486.1	34194.4	23048.7	29698.9	29263.3	33150.2	24523.6	32423.9	39099.8	48894.8	133016	22653.2	31240.8	29639.9	47749.2	29334.3
10.92_148.0636	890.693	577.178	373.527	1198.77	1359.85	1095.61	689.394	732.66	154975	396.864	511.977	701.565	527.962	585.544	307.708	437.057	599.412	765.964	937.281	888.124	563.762	831.485	424.569	684.19	1500.28	432.165	512.649	323.61	648.183	430.296
13.08_241.1676	57551.4	46445.9	52738.6	49135.6	53873.4	34696.5	41260.8	39506.9	48174.5	44004.1	41615	50943.8	50099.3	45789	42386.3	57551.3	48879.2	46431.4	55523.7	50515.9	50385.2	54104.9	140846	119773	110829	74309	73088.1	64179.4	89637.7	83729.1
7.139_162.08267	377.824	363.203	336.174	326.286	283.269	331.222	299.431	277.858	373.644	256.289	277.475	250.892	276.191	409.387	261.2	445.443	254.083	245.79	258.799	254.847	265.627	257.33	261.732	297.341	283.793	319.646	256.86	267.846	268.821	271.674
9.722_383.17334	1292.24	3085.8	18822	5750	1975.17	11870.5	3529.26	3201.87	548.656	24759	1658.11	13401.7	17335	12724.7	3006.73	9888.45	2458.18	15678.9	628.868	3507.84	1754.69	424.141	4502.37	3929.7	6118.53	6544.18	602.308	987.83	605.97	4931
4.878_302.03115	1005.44	1057.08	837.864	68855.1	863.149	1125.04	704.252	828.732	4888.98	694.283	659.573	695.831	789.022	586.068	588.672	611.692	7302.22	1252.67	875.072	612.968	8736.68	799.761	4707.85	153200	3230.8	46926.1	582.327	14612.7	90463.3	2706.44
5.702_170.05547	13016.8	8043.71	6360.68	9390.04	6637.04	6654.69	8572.08	7540.7	153190	11126.4	6704.21	11568.5	8648.92	4731.39	3270.14	3752.06	929.421	5201.32	2845.04	2666.09	3606.07	1578.65	5188.42	5715.23	15076.7	6063.94	6017	2425.88	3547.74	3075.19
0.745_233.90974	49453.4	17466.6	18382	73213.5	17418.6	69678.6	38550.7	71505.3	7848.19	32848.4	8804.98	46965.1	75785	35257.2	14398.2	10058.8	6043.38	20523.5	1033.33	348.832	2660.07	318.822	7585.07	6703.13	99805.6	3627.67	367.488	12817.5	12368.4	8940.38
7.924_270.10767	38872.8	31441.1	35748.4	34246.3	26548.4	29462.8	27843.2	30545.3	30116.2	30992.9	28380.5	31950.4	27936.5	28338.6	28799.1	36470.8	34575	32007.6	34661.4	30508.9	29532.3	32011	92191.9	77861.4	152997	46905.6	45885.6	46897	59319.2	59092.9
15.275_886.52341	163.15	186.995	225.029	166.127	186.361	247.156	178.614	200.006	152952	250.397	163.204	243.425	195.656	318.078	166.636	218.753	185.124	165.246	236.551	140.573	257.597	191.847	174.99	247.969	208.758	289.33	224.015	374.304	208.475	159.779
14.815_519.35584	235.201	221.284	275.833	251.28	311.205	328.791	240.396	301.151	309.675	292.771	350.007	409.395	298.632	211.509	234.7	249.21	216.994	341.058	293.989	343.779	218.013	322.399	326.633	360.292	312.041	339.006	281.215	454.067	329.325	334.186
2.867_298.99629	2194.09	2639.17	1757.84	1244.1	1133.01	1434.65	1241.7	1817.11	1068.97	1107.47	939.922	879.214	1806.31	1467.5	1409.57	968.715	937.579	854.588	997.772	973.79	874.034	852.474	916.542	1633.28	2202.03	827.13	883.635	851.067	813.661	1190.94
3.725_151.04939	1282.76	1484.88	2309.58	1104.02	1045.86	1726.74	1252.06	1379.56	151485	1719.05	2267.48	906.859	1574.93	2386.29	2313.55	1552.9	775.008	1129.28	822.536	993.415	1160.76	673.382	2285.43	1302.89	2419.46	2803.97	726.585	1418.26	840.601	946.356
12.446_260.0981	4587.31	15544.1	8797.9	837.639	11133.6	30584.3	8525.68	740.339	10057.5	15124	1888.46	13467.7	3229.61	44572.3	305.681	15476.4	7061.54	1165.16	367.24	14572.3	3814.91	6265.85	2073.17	41112.2	559.464	60645	14816.2	436.908	23528.8	32253.1
0.733_596.00377	1383.22	3216.59	2157.98	4359.17	2538.62	2816.52	2247.58	1624.24	150473	1129.78	3369.39	1078.54	1163.8	3146.86	2724.81	3637.7	2827.8	9906.95	4219.68	682.763	1782.23	2032.23	26514.2	7042.53	9853.16	3793.71	5989.31	1476.2	5941.76	4177.15
0.74_693.98094	1751.71	4377.52	3600.11	14115.1	2049.2	4742.63	1489.54	1367.27	150277	3549.31	5220.24	946.544	1008.18	4142.03	3041.41	3484.39	3125.6	11052.7	1113.81	599.204	1996.93	1075.84	23562.5	7511.12	17005.1	4686.21	2803.83	1914.35	6471.22	5076.87
6.616_300.11157	369.32	883.906	374.599	1865.59	334.181	2134.21	468.242	1088	390.66	1571.74	738.634	270.436	411.477	4414.26	1613.82	2957.03	2859.87	444.229	1352.64	606.911	713.451	308.254	269.206	905.724	296.563	307.075	788.61	1053.57	858.359	2401.99
8.656_326.12724	18345.7	34854.6	30326.5	9310.89	13750.3	29377.3	21505.6	27472	747.346	26974.6	40926	39678.3	41787.8	38768	17990	148481	28785.2	11817.2	52201.9	40688.8	22875.3	36070.1	55783.6	134144	1638.09	80646	67248.1	43926.4	39184.2	78883.9
8.964_826.38946	348.47	303.254	281.622	463.4	310.211	745.606	281.56	315.115	148413	277.118	336.394	286.594	358.35	910.943	261.292	309.868	285.173	294.968	393.311	249.059	273.969	287.081	301.084	373.882	297.57	332.782	277.904	296.623	315.101	334.356
7.577_417.13544	333.411	325.788	285.016	300.813	277.069	309.603	255.986	258.592	378.897	256.947	249.505	229.234	240.837	242.964	224.658	244.505	272.759	236.535	235.722	227.947	230.081	249.76	248.828	259.699	229.1	281.101	241.065	262.61	288.394	301.34
13.782_276.20864	912.046	970.033	250.263	4497.54	644.927	1162.9	892.899	2749.09	811.386	667.068	15484.7	366.03	783.92	582.743	430.276	629.964	657.198	690.647	783.224	989.977	912.886	997.204	399.654	754.05	383.387	1702.16	799.115	2458.31	613.164	510.52
8.661_294.1552	3701.02	3479.49	28035.6	5605.65	5819.92	13303	5682.49	10142.9	409.162	34465	2148.29	31997.7	28052.1	16505.5	7306.51	7793.5	3913.59	15112.7	571.75	3854.58	4432.71	275.656	2473.17	3908.83	18090.6	5000.19	456.754	605.204	1101.66	5627.68
26.417_428.36499	7748.09	10372.9	9418.85	2382.84	31025.7	26739.8	2340.13	6181.25	806.395	6481.78	19531.9	25315.9	10109.7	23782.6	8829.29	1956.5	2503.72	4325.74	3652.67	9449.97	2498.4	2826.99	146699	7482.52	1226.95	10534.8	2844.18	7010.43	6268.32	6035.13
12.209_240.08969	12971.6	17556.8	8825.72	74271.9	13242.3	37173.9	2592.54	8406.6	146464	24537.7	2275.17	22346.8	36556.9	18652.1	1322.7	3361.87	751.344	756.68	709.854	1682.64	37460.7	833.811	2160.13	22026	5306.32	9830.23	1275.31	4121.77	14311.5	9602.76
15.183_644.41112	252.387	206.277	166.622	267.4	390.592	331.853	320.611	231.705	146439	1344.17	194.976	489.576	200.788	526.577	571.588	939.401	455.981	243.591	347.554	382.795	185.712	418.726	262.584	259.122	1294.46	530.061	391.14	765.216	1319.56	973.708
12.747_285.13951	1947.4	1014.67	1092.94	987.406	649.557	1056.71	927.431	1129.92	146023	1079.08	836.448	845.916	1089.54	1011.45	748.565	2321.57	938.236	1223.27	799.401	782.816	786.007	688.559	1170.14	885.676	1504.21	888.972	881.86	1005	1047.88	940.536
12.775_342.2878	24958.5	11898.9	13463.8	13533.4	13534.7	7828.64	13846.4	10930.1	145491	11437.3	17045.5	10521.9	14396.7	12508.4	15274.1	24980.9	15719.8	10977.7	11223.6	6795.01	10065.7	8266.22	28688.5	11002.7	21376.8	18822.7	21703.5	12969.9	8225.69	11282.8
0.753_593.87025	40624.1	12818.6	10397.9	57562.4	9644.65	62280.8	23874.8	47022.6	1735.41	25295.1	2747.53	30964.8	50860.3	24346.2	4542	5265.96	1647.78	10859.7	310.958	276.574	443.069	279.943	2294.88	2814.22	112957	954.871	322.675	6251.01	6597.72	2706.97
7.55_317.17352	627.167	4950.83	1284.65	9827.2	485.875	3856.94	5485.02	4644.55	43125.9	2031.33	1177.37	1994.67	1545.35	5245.81	4570.35	443.773	462.196	436.562	413.368	446.354	403.476	437.984	584.632	465.053	4643.08	691.036	434.864	440.54	529.231	528.437
6.692_274.1349	772.995	787.631	688.836	758.511	661.918	651.21	591.756	573.122	847.092	554.848	542.41	557.488	555.446	581.276	506.545	609.283	593.145	579.117	607.713	550.151	534.24	521.713	554.113	586.048	526.237	595.431	526.735	575.41	576.383	583.86
10.951_369.12175	893.959	1786.79	837.796	671.004	436.063	1308.03	2363.4	1472.3	613.491	834.82	403.463	404.985	461.19	430.695	406.791	1538.55	461.104	817.912	706.23	483.309	469.746	410.892	582.236	577.215	22335.4	592.653	461.844	474.519	553.456	547.923
10.016_284.0682	577.24	1375.02	797.951	32957.3	443.605	1722.49	4692.14	14697.1	3232.01	1700.52	34509.6	932.173	1457.65	1995.71	436.863	2230.85	736.999	715.345	507.107	433.523	516.057	410.646	493.661	1049.15	868.542	24037	494.997	466.117	662.024	672.02
0.712_261.97399	37484.2	52567.2	52258.1	47525.6	46461	19715.6	26148.5	20142	21744	25763.8	80214.9	23817.6	23559.5	34245.6	59610.8	73268.3	55388.2	37825.4	36181.8	30980.5	41592.2	42117.5	73686.2	93308.9	5262.88	73467.8	64886.3	42122.7	53480.4	51186
15.281_930.54953	183.009	189.054	227.507	167.956	188.413	249.877	180.581	202.208	142866	354.386	166.749	246.105	197.81	568.569	260.186	177.993	187.162	170.169	239.156	142.121	260.434	154.872	208.861	250.699	211.057	228.631	226.482	378.425	187.855	249.921
15.831_705.16513	258.886	271.73	279.284	244.285	262.548	260.653	410.914	388.504	230.283	342.333	349.543	248.674	324.995	428.582	258.868	331.292	337.081	393.306	218.472	304.269	281.566	305.897	173.566	236.19	246.937	246.922	219.336	246.27	250.719	781.106
12.038_375.27703	1116.16	852.72	1145.78	3309.48	857.713	1012.76	857.865	881.941	1290.08	944.121	957.626	7280.05	1390.8	1260.24	1031.45	853.32	1241.47	1272.14	1112.44	1069.07	1943.31	869.813	1393.08	9044.43	13448.7	16706.2	1627.58	7861.51	11319.4	1445.21
0.959_351.08414	10454.8	11837.9	8224.25	11840.9	5929.14	5514.41	2976.53	6942.22	5975.64	5782.91	5920.1	5637.11	8240.23	4034.06	7169.29	1776.8	1487.28	3537.54	2903.22	3244.19	4514.54	3825.08	16832.8	15292	245.634	6117.65	14484.4	6763.14	11260.6	5180.35
0.757_659.8995	28001.2	19759.9	15691.8	74346.9	9213.48	53183.2	22143.9	37340	15618.6	23755	3859.7	19018.5	38770.6	29482.9	11404.9	8361.18	4516.39	22263.5	429.38	350.548	2500.21	354.818	8986.16	7295.28	136655	3177.19	408.978	7030.72	12856	7823.47
9.592_237.1339	8109.35	5796.37	5817.95	3472.6	4794.81	4552.08	6346.06	5764.35	141070	5281.38	4493.75	9720.16	6922.41	3783.17	5778.53	3959.74	3850.91	3475.2	15087.9	2943.65	2261.5	1971.33	7598.84	7511.65	7352.62	4237.8	4023.57	4747.72	3666.16	3924.27
9.729_410.18376	541.054	876.655	522.63	7369.17	446.769	3729.64	2924.08	8527.77	4064.06	478.701	4239.6	734.929	703.249	2275.94	442.449	1144.44	1225.55	518.961	475.325	418.843	461.836	440.47	506.436	541.23	2013.03	17768.5	565.494	557.182	2155.13	1159.74
1.113_476.16803	8452.48	15739.9	3464.04	36144.3	5944.11	16174.8	3184.95	19095.4	1773.08	57400	23735.7	2994.54	4251.58	15436.8	9954.32	17796.3	41424.6	39926.2	13219.6	19027.7	11194.1	31554.4	39203.6	31427	645.806	21404.6	25253.9	87674.2	31312.6	34796.6
16.964_537.343	205.89	207.557	221.951	201.56	198.27	203.67	328.651	207.187	192.989	192.217	180.846	183.032	241.413	188.192	530.806	162.744	143.184	161.265	165.756	236.748	164.882	194.035	240.692	256.795	174.42	243.475	176.4	204.592	147.848	269.633
10.2_292.08785	1549.31	1649.44	790.163	1174.69	1006.21	5285.25	637.917	4656.14	764.078	3906.89	530.452	804.622	2419.04	5066.94	503.728	2709.47	740.592	3428.74	2085.33	590.344	1046.69	554.639	1675.44	1970.49	3240.42	976.119	745.06	2809.88	2608.94	5092.03
15.601_539.30114	5133.22	199.205	330.194	230.812	588.356	932.603	1299.75	315.674	901.702	861.337	318.314	190.316	2023.74	370.395	549.745	1057.23	300.884	387.873	1061.41	249.241	2232.1	375.214	2960.87	2157.91	2551.15	290.754	517.949	964.518	637.784	1887
10.984_331.14485	801.949	618.19	651.434	631.624	617.354	1210.1	626.973	3879.21	868.546	594.21	632.377	576.981	712.329	617.666	570.833	841.975	664.529	1169.03	659.745	684.242	665.039	649.785	824.296	817.189	18978	778.518	659.95	692.047	1055.88	805.105
0.942_204.97977	42966	22760.9	35070.8	44613.6	29249.7	19446.6	11343.6	13856	8930.77	10703.4	13123.2	12647.1	16109.2	11397.2	10947.9	23570.4	15918.5	10956.5	25869.8	19732.2	28701	22957.7	32351.1	37750.6	40873.6	23215.8	30254.8	25190.3	25854	31454
15.649_285.23009	187.523	236.623	362.03	4922.72	226.406	201.689	359.391	2584.29	429.134	207.056	349.873	1207.81	1443.6	208.805	190.207	835.336	343.635	813.945	562.084	532.355	181.456	653.03	159.909	368.542	273.917	9257.51	258.807	518.074	202.406	358.359
15.039_556.35863	159.6	156.892	169.828	172.316	263.452	201.389	194.096	200.242	137215	245.269	143.325	218.689	228.42	283.318	176.193	242.609	178.397	269.484	202.161	144.393	130.172	169.896	171.871	281.495	179.794	311.525	261.655	252.98	261.724	241.802
5.144_321.06375	7199.5	13390.5	2288.34	21946.4	3083.61	8632.71	7352.64	13898.1	15096.4	19487.7	6984.29	3644.94	6505	15983.1	4894.4	12715.6	8500.91	5348.78	2318.48	1765.81	2362.76	1360.63	2223.06	15862	17476.7	3433.04	2350.46	10154.5	9243.95	14861
5.486_262.13155	836.062	1598.43	2767.55	6384.24	1253.29	9254.24	1919.96	3501.71	136925	2438.11	1143.64	1756.14	2288.69	5702.52	706.582	810.384	1020.63	829.204	515.66	498.129	568.056	561.473	628.407	642.171	562.668	572.284	528.541	649.229	746.903	580.11
4.891_230.01016	12903	8436.89	7797.33	135968	12425.8	12369.9	18379.9	18506.6	47516.6	12110.4	4110.06	13940.7	13190.3	7713.19	7000.88	15183.2	47353.1	27713.9	24494.7	12744	58471.5	19215	36812.8	121777	31970.3	124849	9155.71	68999.9	118428	28956.9
9.14_291.04201	1929.8	1057.6	2513.1	2675.52	2331.52	1041.64	1513.76	1436.66	8145.83	1779.17	2725.44	1685.8	989.643	1929.11	1754.79	2086.41	1117.97	1583.8	8740.15	2191.91	4552.32	2051.46	7267.43	7048.16	4829.03	5993.96	4282.27	4372.42	4323.38	5723.72
0.855_138.52375	49126.9	117985	28631	42398.6	40023.6	82848.1	53264.8	84012.5	21737.1	58803	53498.9	26611.7	102705	69963.5	76571.9	26511.5	21308.4	15326.3	11052.9	18492.9	20293.5	24853.3	79356.4	17945.2	1945.37	39962.2	42902.9	52131.7	108352	44033.4
12.343_232.10494	2006.3	1592.5	1492.47	894.527	13966.6	1336.41	473.611	683.073	428.163	3274.95	1735.46	13550.8	1016.4	504.298	2502.36	6917.84	522.961	564.745	34927.5	670.32	4297.61	23120.2	517.839	41427.6	618.134	33250.7	2682.43	442.136	624.397	3759.03
8.119_210.13669	18502.6	16594.3	14310.4	54016.3	7738.76	33383.2	14815.6	25238.7	16071.5	10442.5	11148.9	15325.6	20857.6	16400.6	6739.32	20569.5	14495.4	14310.7	17385.7	17375.7	15562.8	10177.9	26904.8	41015.4	69240.9	23338.5	19945.6	23484.7	16364.2	39701.1
5.232_152.0334	335.776	333.241	356.013	296.459	291.631	261.32	256.32	254.72	324.494	236.892	225.017	235.666	246.835	219.225	212.742	226.932	211.331	212.719	227.05	208.781	203.475	216.883	220.39	254.052	216.026	225.542	230.264	218.279	234.631	220.646
6.607_376.09814	17798.1	35583.7	21159.8	25011.2	10062	21804	17636.3	30362.2	593.361	28219	14195.2	17245.7	32296	6675.36	28543.5	91696.3	75964.7	16951.3	56799	80127.3	51332.7	77754.9	98473.5	134177	19495	105242	89867.3	112150	106256	96956.1
15.565_264.10994	359.408	503.236	510.836	12144.1	6904.07	3205.21	1447.47	10652.6	386.72	1660.09	412.846	553.376	548.692	526.144	421.236	653.779	543.786	700.381	523.075	473.621	434.383	523.782	744.674	7478.97	641.95	10757.3	446.528	1002.47	582.212	13535.5
16.809_447.18646	222.336	204.494	226.128	180.735	238.559	214.515	288.553	247.914	188.491	214.007	216.398	237.287	193.073	228.004	260.966	279.321	177.568	258.212	183.134	190.308	161.486	169.499	205.271	230.114	206.553	173.68	189.749	192.642	187.281	213.736
15.266_842.49735	216.54	248.188	298.668	1093.63	771.012	606.169	200.175	265.456	134108	736.675	243.12	323.083	259.683	274.274	398.19	290.338	303.533	270.835	495.839	252.202	568.457	254.628	605.623	329.114	319.508	384.01	430.682	496.791	277.762	212.065
5.9_288.11818	65912	57867.7	40147.7	52854.2	39318.5	40283.7	53079.9	56139.7	28454.9	54759.4	51079.7	40377.3	54262	36774.5	39059	65251.6	46378.9	42078	43493.6	48376.3	48681.9	44646.6	133679	95974.2	597.128	76717.4	58302.9	48859	83215.3	67299.4
15.464_1086.66533	166.884	158.177	171.878	187.291	233.399	184.858	201.401	221.57	233.903	188.829	296.596	147.323	142.996	195.516	161.96	233.32	182.142	208.977	177.942	149.707	499.169	174.546	442.437	569.366	174.138	838.677	339.657	275.263	258.464	317.136
0.835_180.97209	18824.8	46834	28590.6	79416	19351.6	29347.9	25424.3	34214.1	29209.8	32474.5	32976.6	33203.9	20051	24395.5	13026.7	7786.76	9054.02	14985.7	7919.84	12001	15945.9	14420.4	60017.3	22475.6	552.783	21437.4	24739.8	19277.5	39744.4	25605.4
15.097_512.3322	203.223	204.324	229.335	201.135	250.805	243.24	249.453	339.136	132737	538.974	241.354	190.857	202.184	396.49	226.482	261.041	227.967	242.491	195.379	195.568	230.391	226.878	310.727	435.065	246.282	290.303	479.867	296.07	227.234	409.498
11.226_380.1402	545.296	522.669	484.374	506.839	491.442	631.347	488.581	547.464	638.948	466.62	462.664	456.335	507.964	506.93	471.179	590.55	625.007	595.374	570.704	488.106	510.497	479.061	663.742	638.604	793.404	682.064	616.799	547.542	614.206	823.831
7.057_312.14702	4196.33	18626.9	9719.29	21044.5	2960.29	22382	14520.4	11120	52132.3	16951.5	7090.16	15854.6	11683.8	17677.9	11673.5	4589.25	6133.98	13780.3	1047.19	858.483	838.378	918.865	14009.8	4857.65	565.315	14973.4	3995.55	3202.57	12391.8	3157.07
7.214_268.08794	517.835	537.228	348.061	325.807	307.018	954.714	326.326	389.656	430.141	467.281	283.839	304.993	288.001	846.463	344.849	762.759	596.973	492.6	754.658	267.445	282.158	300.379	286.762	303.087	292.487	315.226	299.091	307.535	264.18	461.946
0.75_413.88967	45251.2	14406.6	14683.6	55107.3	11978.1	63296.6	27260.5	59001.9	3035.77	28903.4	4388.34	36532.7	57606.6	25409.9	8453.51	5107.93	3613.56	13175.8	399.421	393.43	1089.61	359.583	3006.5	4725.43	96035.9	1690.35	414.471	8193.4	8486.85	5837.51
16.577_509.34791	241.699	217.024	245.79	219.734	243.979	271.634	205.21	428.398	196.054	219.014	251.086	235.568	458.834	232.156	357.104	199.789	323.986	213.009	226.275	210.85	254.08	162.901	241.791	314.63	321.065	394.251	274.154	233.025	324.886	239
15.718_319.21434	224.209	313.168	324.539	13589.4	1728.88	1905.15	201.654	10343.9	255.801	788.166	283.065	2611.54	2975.9	375.702	251.112	470.872	377.51	2868.72	1275.04	256.863	438.741	373.02	224.371	575.745	310.275	16871.9	318.774	469.94	353.692	929.193
6.603_342.12211	11289.1	25008.9	13023.5	16459.7	6170.61	14007.4	12586.3	23404.7	572.044	19642.6	10254.6	13132.2	18577.8	4568.03	19313.8	64619.7	47727.6	12992.4	35379	45458.4	30819.6	45920.8	64502.7	104954	10766.5	99943.4	56796.2	91381.6	80427.7	73462.8
14.901_499.26982	4799.5	901.191	1197.01	20698.9	2241.72	1953.52	282.275	1294.73	14607.6	1327.64	1383.78	2277.55	2302.02	645.035	1894.03	805.342	1974.09	694.05	988.033	525.587	4376.79	4048.08	7442.13	4014.17	3940.14	1061.55	1985.32	584.6	9254.96	1943.82
11.964_226.11794	6805.08	4535.32	3636.96	5216.4	8221.94	4714.97	4286.26	4529.7	14063	6773.51	4650.13	6934.51	5523.37	2067.64	4754.29	48499.8	10215.9	18272.7	30113.6	58241	43041.5	85662.9	113759	129635	49392.9	38999	78438.5	12567.9	117284	10874.9
12.007_317.12938	588.285	4968.57	2876.85	1307.37	620.084	609.491	5024.25	1001.85	1796.14	65343.1	1953.58	2861.97	125880	79350	745.691	5149.12	16424.6	44189.1	1443.66	540.235	450.373	450.254	4204.22	4310.7	1056.19	923.788	1028.93	3915.21	1100.76	10236.3
13.567_477.18969	382.263	551.824	296.26	379.164	401.522	438.026	350.624	645.536	376.849	321.422	1129.09	421.041	395.67	10715.8	408.871	10300.5	3765.11	585.347	901.336	378.528	333.87	380.316	9405.85	687.318	464.193	8482.98	484.519	659.369	2442.2	846.371
6.5_348.17555	12494.6	10474.7	11894.5	8497.67	10719.5	9476.48	9684.2	15848.2	125333	9192.53	10182.9	11970.4	15804.3	7933.86	7853.11	11588.4	11283.8	15216.6	14494.2	14026.3	13196.5	9043.61	12604.4	12475.8	402.643	15372.5	17005.9	9227.91	9920.09	15517.5
10.272_270.14781	387.713	314.718	322.391	354.524	332.528	389.521	324.254	380.9	124904	423.504	303.437	295.22	305.278	331.352	298.47	387.398	374.319	362.884	324.788	342.189	323.981	276.974	375.52	385.274	411.669	385.287	360.627	383.7	363.493	400.645
16.685_571.36373	178.739	135.863	155.735	276.626	152.747	159.601	134.01	497.926	152.14	133.235	150.684	240.353	164.119	228.081	125.156	123.775	108.275	115.545	160.422	133.784	726.108	129.416	132.463	202.113	155.546	430.865	121.599	109.27	187.753	250.196
9.93_357.13651	6039.72	16391.7	6124.8	82621.2	1801.76	53853.4	5397.98	20425.2	3758.97	21670.7	4911.22	6650.08	30990.6	33555.3	5709.08	10454.1	5173.81	9717.65	679.346	293.922	4885.88	302.999	3143.69	6787.74	2703.11	7596.24	1767.94	2455	5838.67	5007.58
15.132_556.35863	161.719	201.44	182.425	188.943	205.959	266.877	180.908	278.495	124431	750.309	204.703	227.299	248.04	396.959	211.674	166.091	172.096	173.275	180.894	165.189	189.194	160.816	151.305	217.269	277.195	216.874	214.916	201.692	228.839	337.076
11.106_276.13344	933.357	989.614	919.059	1769.9	1192.95	1449.6	740.236	1318.36	123787	2246.91	1505.67	990.744	1229.91	1266.31	1016.1	1571.19	1333.43	1907.47	1592.32	1480.05	1002.52	2049.76	3076.68	1908.06	2432.55	2526.56	1694.49	1594.82	1900.99	3133.71
15.449_292.20354	2589.56	6769.38	4204.37	7086.88	2888.89	4617.46	4458.68	6953.77	1814.66	3263.76	8505.72	2373.89	2695.1	4235.45	1676.68	2364.84	2413.19	2004.52	2706.89	1894.45	1350.65	1689.76	1346.96	5499.67	2051.1	4480.47	2446.4	4411.18	3349.96	2395.88
15.069_228.07846	5410.96	5134.83	4438.5	3493.29	3750.67	2451.75	3390.38	4973.45	4962.17	3322	3073.15	4124.32	4581.65	2557.54	1897.08	8206.07	4185.68	3103.61	4996.94	5536.03	6405.03	4354.13	9328.26	12232.5	6119.2	7383.02	8105.04	7349.26	6328.93	8658.18
15.208_688.43761	246.426	244.201	240.783	317.002	309.634	316.061	416.731	474.007	121763	597.868	253.066	274.735	258.023	274.955	258.354	188.153	471.461	242.651	351.499	253.174	297.156	289.28	225.646	582.066	340.071	377.895	439.982	585.823	348.688	237.834
11.738_410.15486	282.814	285.049	263.794	255.419	260.477	440.61	263.654	428.179	520.478	310.079	278.525	266.192	403.405	321.68	237.622	368.884	333.676	458.727	272.196	257.505	272.205	274.757	398.823	377.014	563.74	407.196	302.685	320.692	332.936	365.039
15.294_593.27875	401.264	223.676	289.977	279.353	240.148	703.184	268.215	751.388	471.566	209.369	212.536	313.681	258.064	230.456	805.43	361.904	375.558	216.894	356.754	181.145	592.56	226.587	1055.05	429.975	269.01	291.409	918.985	534.858	467.745	545.238
7.156_417.13544	543.578	522.544	483.657	469.43	407.541	476.532	402.251	399.756	520.818	373.116	368.33	360.96	397.358	391.028	375.791	412.984	403.496	353.621	382.945	366.651	393.966	370.223	376.557	432.21	408.295	459.877	369.546	385.352	386.755	390.859
11.071_218.16692	6442.73	10127.2	7182.2	5514.59	8334.08	4331.21	10591.2	7222.2	5856.6	8388.39	8193.78	14206	3391.67	8657.24	6808.54	4963.88	7523.06	4203.62	1229.64	987.417	6127.72	660	4186.06	8492.68	88234	8133.33	8520.25	9534.91	9261.28	1412.96
12.861_224.18871	4276.35	3766.84	3958.47	3962.36	3140.91	2641.1	3175.51	4279.75	120466	4808.54	2799.55	4427.25	3457.09	3788.75	4289.77	5093.31	4387.28	3607.79	4052.51	3412.17	3250.1	3288.64	12556.4	8773.5	8779.73	5392.58	5252.2	6988.46	6380.05	8154.2
13.394_374.18718	6584.24	5501.76	3681.33	544.448	3236.7	8585.68	3289.4	4536.76	1138.06	3722.24	811.316	4471.43	7134.8	15848	1601.97	6177.59	2989.02	4832.68	2735.41	1158.71	7556.71	1553.64	1173.61	9010.88	811.539	9859.85	1568.03	1504.04	1339.94	4157.51
15.078_600.38494	177.459	195.566	162.178	222.778	186.451	162.604	191.609	209.32	119836	825.542	191.377	206.508	225.91	369.678	187.764	373.122	375.164	201.036	155.316	176.534	230.331	188.092	180.973	360.689	265.753	167.409	397.832	208.728	188.388	339.493
14.329_224.09482	8311.53	7038.01	929.061	2197.6	3414.49	30007.2	1293.71	15054	357.908	2723.3	1079.05	2532.75	10724.5	1060.87	340.481	1564.92	518.4	1311.93	1071.17	1190.22	47285.7	791.852	5873.89	30256.8	1744.49	2221.33	4241.74	5807.52	8078.41	13477.9
14.447_260.13618	486.56	957.963	941.776	36549.5	2402.29	5208.88	5036.28	6238.77	1988.43	18080.8	1065.88	1646.75	2323.46	1827.82	1147.73	9269.82	7633.58	3043.09	5257.99	243.507	1000.41	3698.37	3751.27	11182.3	2504.3	59531.4	914.797	718.542	2797.88	28754.3
9.147_314.05793	10517.8	6104.77	6452.5	6890.58	6744.39	7259.47	5786.76	10552.3	20316.1	9926.17	8766.04	8491.61	5727.05	7751.81	4995.62	14172.1	8996	18553.6	15910.4	23580	15594.2	20742.2	91617	85709.7	78061.6	33911.2	55935.2	27567.3	75592.2	32161.1
16.73_302.22418	27831.3	20561.4	19600.7	15191.7	11698.7	7325.24	9130.22	25807.9	20359.4	5210.16	21797.6	8539.86	7807.41	6755.71	6712.31	46100	95417.3	29119.8	27619.9	22989.4	31766	20775.3	47764.6	106044	26425.3	40071.7	25643.1	70647	29354.1	64012.2
15.414_2121.29551	203.561	187.494	165.301	242.553	201.938	378.535	242.659	317.817	264.675	262.77	347.004	240.447	197.569	224.515	237.355	219.566	245.107	257.514	212.093	192.886	294.975	238.008	231.426	583.907	248.262	307.189	182.905	350.249	322.166	312.097
7.346_288.1107	1233.94	3739	565.425	3128.52	8442.34	34749	391.918	669.08	578.868	1653.88	370.075	1090.56	4009.96	1036.78	356.291	422.44	521.861	396.23	377.79	413.28	14712.6	377.958	377.097	3458.86	808.097	564.015	393.344	913.051	9299.5	1281.41
2.17_526.0857	1864.67	2200.89	7268.92	1612.68	1092.99	1319.15	2199.77	4042.94	2248.47	1504.63	1598.51	2463.59	1976.52	2022.64	2813.65	521.396	938.013	460.7	497.137	471.496	453.582	464.737	454.018	669.708	1403.28	769.819	449.743	459.952	452.099	500.98
14.86_1024.58038	211.232	232.94	198.815	249.415	329.702	245.313	205.941	195.611	200.359	206.989	286.069	218.537	220.334	271.141	214.412	247.21	237.903	197.568	284.562	200.089	196.055	288.591	350.366	253.87	218.369	430.684	243.375	289.654	390.046	287.501
4.606_151.04938	996.665	5499.95	1202.1	6777.88	1967.81	2043.64	1484.23	4054.19	32316.5	3842.46	1516.09	838.648	1134.43	3590.22	1280.5	2301.63	3784.08	526.114	2956.62	1979.25	881.236	1215.46	2998.53	3161.69	2662.33	1127.79	2155.67	3676.99	2949.74	3454.05
11.343_322.15696	16596.3	9877.62	9794.99	9074.49	10141.7	4860.39	9164.71	7086.13	115772	6736.67	7048.34	12781.7	8683.45	5818.61	8902.02	9244.88	6832.6	9544.29	15707.6	8542.38	6696.62	5761.49	14422.8	10619.7	785.389	9824.49	10383.5	12134.4	7355.96	10264.6
13.675_294.11437	1521.13	8168.58	3787.23	19026.9	10276.6	16481	8231.38	23863.1	966.745	33867.1	3987.24	2189.14	3361.03	3058.89	1092.26	10094.6	5369.52	13809	1343.02	484.962	7912.43	3088.72	9179.35	68256	5317.99	17981.8	2967.08	2272.46	7878.19	72377.1
0.75_331.88652	45526.1	11520.9	12465.5	43022	11433.5	54160.8	29202.1	63597.6	4157.53	26066.7	3606.68	39292.6	58599.4	22470.1	8254.83	5550.49	2420.96	12423	346.978	308.612	1308.58	312.371	1971.95	3106.87	73989.1	1377.98	360.052	7850.55	5624.79	4914.07
0.966_630.17881	641.429	1435.34	552.381	1757.06	399.153	449.655	383.898	694.506	1848.05	553.214	339.199	315.735	321.79	283.372	442.535	260.889	274.013	291.578	261.561	250.174	280.513	243.549	282.447	832.796	237.587	726.831	300.778	281.602	296.293	316.119
15.201_886.52341	181.561	208.151	185.337	194.001	203.011	269.403	355.212	220.934	115117	413.55	215.707	234.178	203.291	366.831	220.215	160.377	277.857	206.83	184.335	210.661	253.289	234.991	205.331	496.139	289.868	322.109	375.03	499.342	220.872	327.317
12.523_309.12526	2750.18	5204.29	1306.88	5725.11	17318.8	8641.85	1562.99	5589.48	563.17	10223.6	1763.95	2972.14	10783.8	1224.03	2546.59	24775.7	1519.45	3670.56	13708	527.634	8995.14	7641.28	7348.13	32185.8	3771.91	9699.96	4928.28	1917.06	2758.3	43991.9
14.004_390.28546	494.333	7402.91	206.2	9546.97	805.929	9032.87	4862.88	20186.2	5679.16	8616.09	993.04	1109.27	3313.11	4195.92	363.245	9946.12	4163.3	1035.22	1152.28	268.651	289.37	240.241	993.213	2732.72	1798.77	11495.7	343.17	3521.15	8408.5	4162.87
17.516_131.04968	232.478	192.697	226.163	214.063	203.427	647.649	186.575	185.282	211.92	170.109	169.852	192.768	172.84	174.824	425.373	166.731	183.471	293.263	151.932	228.754	159.827	170.001	149.814	187.142	195.345	220.923	210.021	153.692	202.113	154.26
0.958_409.08936	3078.12	3669.35	1747.03	4264.64	831.894	1339.51	1246.14	2714.29	5245.35	2029.68	1036.3	951.225	1410.2	1770.28	1437.26	496.696	521.924	1955.05	495.538	702.897	610.527	763.712	1233.76	1336.27	529.928	3461.95	1229.09	1288.47	701.722	607.192
12.503_351.17119	1906.61	1262.14	2435.54	772.089	515.829	1263.52	669.595	980.597	913.165	865.12	599.707	3779.56	818.025	992.254	1052.71	788.481	790.553	1063.13	1053.78	590.857	569.719	616.478	1049.58	2378.5	1159.23	700.363	1242.72	792.411	1075.18	949.043
15.223_732.46385	226.697	224.65	221.505	291.622	284.844	241.678	249.893	436.057	114112	339.442	232.805	230.509	237.365	268.175	237.67	173.089	433.715	200.576	323.358	232.904	273.365	266.12	203.245	535.465	312.844	347.641	225.291	399.57	320.772	381.275
12.524_291.1147	1907.51	5221.74	545.184	5396.95	16460.8	8644.64	1373.73	3470.85	448.715	8448.41	543.244	3407.34	9967.27	675.123	874.662	22906	1446.3	2002.25	13072.1	380.02	6541.48	7482.16	7029.87	31912.6	2248.56	8894.7	4440.67	732.493	2594.41	44701.5
9.44_332.14015	2491.66	11642.7	8376.53	2838.13	2924.77	21685.1	6192.84	9319.57	867.802	9994.17	1496.09	655.234	4861.45	22413.7	4414.27	11902.1	9681.47	10791.7	4580.5	2459.29	10472.3	3029.31	3068.42	15160.3	1017.42	7583.82	3481.98	3124.63	2495.74	6604.47
0.891_232.98592	28244.6	22720.6	77744.9	15383.8	41343.5	66663.2	34203.1	46815.5	7885.78	23977.7	48726.3	31375.1	31144	22951.2	34909.4	47267.8	91512.3	77042.1	45999.4	41589	44828.5	28133.7	34750.5	45251.4	16496.3	69330	38565.9	48612.7	35989.8	41665.9
9.146_238.02161	559.002	533.802	1541.94	906.741	2349.33	1228.03	1117.3	1191.33	10773.8	1253.25	2215.9	1064.03	1655.84	1095	1234.62	1577.85	1086.75	942.351	4511.82	1761.25	2122.82	1042.56	6748.57	6741.67	2923.53	3201.3	2695.87	2870.09	1455.33	3713.28
14.312_328.22212	24136.4	11008.2	17500.2	13523.5	20208.2	14702.2	15865.4	17251.4	20633.3	16240.9	22881.7	12506.6	35266.4	16295.3	20118.3	47650.2	33807.8	23429.7	29534.3	26608.6	45707.7	26951	90593.5	53287	56102.6	36494	45704.7	48751.1	83748.3	84946.8
11.1_375.10237	617.632	507.507	511.918	4296.93	469.216	932.752	508.621	1962.96	7207.84	531.469	480.207	458.821	1016.74	478.751	443.475	643.959	544.76	881.603	603.968	527.076	454.289	469.037	1438.16	1172.93	77809.9	1319.4	1005.57	825.375	2109.21	634.032
1.317_290.06236	720.725	683.915	705.499	568.425	525.564	502.185	437.253	731.56	1689.06	494.355	530.59	627.195	445.444	498.601	389.137	437.042	395.628	365.292	382.74	367.7	357.364	334.233	377.384	499.827	4829.46	373.963	371.002	366.268	443.111	409.435
12.38_285.19374	1898.58	368.916	302.006	5573.8	649.581	739.054	3614.27	1362.41	3038.51	5302.53	1992.79	381.551	736.362	8791.34	1287.53	2627.49	10719.3	2808.17	269.538	247.613	613.181	269.22	1129.23	6427.54	2957.59	1865.55	696.241	1604.48	1457.79	7045.87
14.335_214.09441	8185.61	3320.2	2799.31	8210.42	4757.13	14195.6	3615.69	3153.26	1261.68	6980.66	1789.97	7388.07	6407.52	2020.37	1317.85	7626.47	1029.56	816.784	5879.52	6841.66	6239.62	10053.7	5607.86	17800.4	1545.25	7697.03	5791.48	4917.37	2918.43	20531
9.136_297.05249	5889.7	7529.01	8844.7	5903.35	6654.77	5815.37	7402.46	8053.16	9874.75	7944.54	5786.75	6455.04	6381.8	8431.42	6566.41	20973.6	10167.9	21400.4	15327.4	31727.4	21673.6	24910	111543	73483.6	97467.7	42555.2	57154.9	28786.1	103658	40100.3
15.107_316.18163	780.789	1558	1564.83	438.54	588.509	3388.53	645.197	1134.01	2903.56	1340.89	418.19	698.915	1035.73	4341.24	588.564	8810.67	1255.14	2127.94	1774.92	784.004	3216.08	2207.49	3887.89	8187.45	736.684	2465.77	1026.07	638.975	2601.46	2056.24
12.812_439.2695	348.494	402.91	288.695	340.164	261.417	279.906	384.572	477.85	316.476	362.146	267.81	348.556	294.719	309.103	322.427	487.845	436.897	438.849	358.406	258.971	482.122	274.935	848.707	389.08	545.969	440.199	311.294	419.759	383.422	414.013
6.792_306.12459	692.626	615.053	601.993	592.31	543.415	551.84	494.339	544.984	738.428	506.44	470.972	475.926	491.786	448.182	431.296	535.288	504.934	497.72	448.287	482.541	481.287	487.508	468.541	488.141	533.334	502.948	498.389	548.832	510.261	500.758
20.774_309.30275	44379.1	2703.35	11234.9	5054.23	2078.87	8199.45	1987.14	19366	14792.3	11226.6	11879.1	12922.3	57610.8	18252.9	1255.72	6486.7	3268.32	8557.54	15273.1	5710.07	2566.92	4600.76	12232	10114.6	3444.32	6313.65	14491.8	3322.95	8956.82	2308.97
10.29_270.19408	6240.3	19043	6863.24	25713.7	2045.15	109805	11091.8	48319.2	1000.94	27760.5	1463.03	5608.98	40915.8	72478.5	5314.7	989.442	1489.66	15463.5	484.781	442.952	543.763	477.157	560.504	575.063	859.437	1745.71	474.533	779.735	566.615	542.204
15.238_286.15177	188.988	171.708	184.66	405.064	237.463	594.242	197.333	363.523	437.671	425.305	201.526	226.294	197.881	227.351	198.135	2715.79	361.57	246.41	1097	338.683	189.971	1482.6	223.009	2809	264.845	26040.2	357	218.014	2468.27	2841.73
8.013_316.07355	2024.57	680.327	1421.47	6036.24	2419	4865.9	1612.03	6966.11	9024.69	2365.13	8376.51	355.797	4887.08	4087.69	5324.25	1117.77	785.784	398.787	1907.43	406.501	7279.84	361.525	2124.51	14931.2	484.617	440.765	3358.25	655.447	3144.78	2765.54
17.517_133.10167	224.914	186.428	218.805	207.099	196.809	336.76	180.505	179.254	205.026	164.575	164.326	186.497	167.217	169.136	411.535	161.306	177.503	283.723	146.989	221.312	154.628	164.47	144.94	181.054	188.99	213.735	203.188	148.692	195.538	149.241
11.344_207.16223	7282.37	3735.2	4064.67	3849.36	4082.77	4040.03	4706.96	4710.75	107556	5288.86	4105.18	6297.79	5143.8	3453.39	5425.13	4375.46	3798.87	5079.88	7538.89	3836.09	2458.91	2219.39	7997.21	6773.96	7358.68	5034.29	4120.68	6154.46	3562.66	6261.12
1.117_137.53409	14833.8	26532.9	10720.3	32561.7	19406.9	33834.5	10700.6	37181.5	2511.87	68904.8	36086.3	11921	11438.2	28309.6	23276.8	31682.8	53512.2	45178.6	25265.9	32172.8	18272.1	46677.5	50087.1	35601.8	1142.64	35417.7	33467.9	73943.2	37400.2	35785.9
13.524_403.14009	366.702	1874.76	1920.1	1926.99	390.224	13087.4	3955.25	13307.7	1203.82	7308.23	33977.6	1337.66	320.588	699.332	295.465	3628.43	1025.7	28157	2271.86	309.226	412.49	376.73	2479.77	811.593	40151	511.04	9768.8	6386.69	38326.5	5359.74
14.218_322.13884	4489.35	4069.91	6082.3	4032.66	4518.21	6305.82	6841.85	9518.45	6029.42	4846.61	5059.91	4679.75	4295.3	6059.61	5110.14	19986.2	6434.23	8138.8	7570.07	22357.9	14617.2	44281.6	51921.5	29727.5	16349	14650.1	15759	8984.62	22827.5	10617.7
14.961_597.23594	1776.03	790.104	515.615	2046.92	518.953	464.601	415.212	358.559	347.023	372.399	718.988	620.384	931.549	392.379	610.911	1220.31	538.088	425.057	657.996	547.859	1458.99	678.279	2325.4	1186.94	593.866	638.548	782.701	915.093	1902.92	1458.85
8.318_532.12163	1088.19	3265.41	815.212	14404.8	272.121	17893.1	1771.06	5991.22	2719.92	6788.85	4271.45	258.186	6006.8	4675.34	2040.41	13945.2	7644.22	11142.3	3133.19	737.121	260.088	350.759	2671.96	5479.51	12587	1829.7	1282.29	6284.68	16474	8141.36
0.766_725.929	6595.25	13713	9786.71	46085.4	7323.46	25575.8	10787.4	15307.5	58165.1	13855	7067.22	6055.37	14443.9	17206.2	9462.08	7557.78	5951.58	22917.1	909.769	457.941	2801.26	443.96	17549.3	9869.58	71905.8	3138.01	1003.87	5071.45	11527.3	6827.73
0.922_338.05259	2007.3	2024.24	1513.57	6299.84	1917.14	1202.73	1470.73	1478.26	7112.44	1044.69	1291.84	1491.32	1566.34	1266.39	769.752	623.231	550.083	728.94	789.442	615.08	1317.31	822.206	619.039	961.392	840.878	1009.89	817.321	762.406	938.759	893.131
10.092_412.12091	1690.37	3291.7	736.538	14452.2	487.737	7953.66	1803.79	3344.58	1910.96	2329.74	1486.27	617.038	3964.63	6314.14	2718.33	1203.66	509.903	665.86	466.225	325.1	898.566	294.358	964.449	659.072	1725.81	724.036	467.1	449.381	844.715	1053.79
14.827_513.28535	4820.09	170.297	301.156	193.381	805.797	426.169	723.034	231.761	774.424	331.183	269.36	315.064	2578.66	611.092	1135.51	406.44	494.439	233.919	1005.54	334.197	1524.83	248.113	2069.31	1396.83	2447.78	210.032	742.003	743.21	1128.66	1504.24
5.156_764.21703	305.518	2197.08	300.728	2127.55	248.478	254.409	239.106	2187.47	977.915	1261.94	226.668	223.404	288.638	1491.73	190.952	577.944	208.915	334.828	210.218	184.742	200.884	192.134	182.113	911.827	393.432	176.123	205.383	440.024	190.075	1127.93
7.14_274.1349	357.037	343.221	317.679	308.334	267.684	312.999	264.209	262.57	331.988	242.188	262.209	237.088	260.995	256.837	246.83	400.46	240.103	232.267	244.561	240.826	251.013	243.172	247.332	280.982	268.179	302.06	242.728	253.11	254.031	256.727
13.379_489.2853	308.643	255.16	254.568	238.525	246.239	308.759	336.341	301.571	358.724	293.736	388.848	286.77	242.482	334.381	317.592	255.995	322.093	331.765	266.665	263.202	294.031	248.204	292.043	307.889	413.046	294.14	293.558	393.053	291.739	374.911
8.818_145.05272	24268.9	33515	9095.71	12402.1	8996.6	26794.1	14068.5	29596.2	19186.9	19121.7	11395.9	14930.5	16290.4	16224.8	6188.43	16052	8268.08	17288.9	15563.9	15612.1	25770.1	11551.9	64432.4	48586.8	48297.4	28877.6	27007.6	26030	30057.6	27932.1
8.938_180.01628	32895.1	9571.75	10132.7	13497.1	15179.1	6622.79	17466.9	12478.8	4997.86	7955.2	6496.29	29440.3	18258.9	7449.48	6212.18	30051.4	11573.8	10369.9	32608.7	37902.8	27098	35254.8	30096.7	50596.4	104841	34645.9	38990.9	37880.5	19531.6	36329.3
6.913_392.20177	4607.02	3747.17	5061.25	3526.48	4689.19	3761.68	4430.81	6505.27	104829	3500.35	3154.6	6668.06	4564.4	2552.92	3312.9	3880.24	3736.7	5084.73	9997.84	5341.45	5263.66	5667.74	5355.34	5446.98	5292.81	8534.97	5372.27	3212.94	3788.48	4326.18
15.189_842.49735	146.028	183.812	148.476	1542.11	397.906	298.278	323.991	179.666	102544	289.03	173.492	308.47	163.505	861.026	156.445	154.539	191.727	193.858	156.943	188.081	156.08	268.722	257.066	399.041	247.369	232.14	301.633	401.616	140.379	263.258
10.492_183.16228	3526.82	1891.54	1809.01	2509.99	1795.58	2291.34	2286.91	2192.93	102425	4840.68	1885.37	2011.22	3198.68	2570.17	1361.88	3471.45	1037.58	1483.13	4540.96	988.29	1356.13	1580.75	3214.33	2715.54	1330.91	2451.71	1952.08	1912.3	1523	2359.91
16.884_321.26634	142.388	144.233	124.923	2565.52	127.202	252.334	182.089	1259.03	318.313	107.097	1672	162.791	140.71	161.26	129.307	101.869	118.342	120.479	154.823	91.4271	104.991	87.5377	304.529	102.347	101.703	1119.16	136.859	86.6211	171.565	196.581
11.196_304.17833	4370.27	26050.7	7398.12	15219	2632.94	102135	11664.9	42337.5	805.472	26093.3	2515.82	6323.18	47212.2	57946.9	5692.18	4696.72	3733.55	19463.9	345.865	324.918	1921.55	309.209	459.49	1202.32	1756.1	6023.21	410.585	806.68	679.986	810.047
13.677_220.1462	385.889	812.735	346.06	3352.74	1345.67	1198.21	904.909	5629.06	487.061	7430.99	644.451	467.095	510.008	592.627	248.206	2336.17	987.511	2266.62	421.518	593.703	889.393	603.718	1329.64	25476.2	619.185	4998.29	572.583	662.608	1212.84	32600.5
15.231_358.2253	172.277	137.018	168.331	2503.56	216.465	704.365	189.904	3318	398.97	388.923	148.072	633.511	702.432	169.694	180.615	140.42	329.599	304.117	961.069	190.569	122.277	202.236	154.454	177.81	237.744	3175.74	171.208	198.736	243.768	289.747
17.246_211.1359	32922.3	40177	33946.4	21627.9	29944.2	29137.5	29357.4	40779.4	6891.51	22245.3	19043.6	31299.5	30394.6	26209.6	16764.3	57999.7	27364.9	27578.7	46780.1	50734.5	52332.5	46219.8	61202.3	92391.4	35055.3	66551.6	61140.7	68202.5	45079.8	63708.7
15.925_2025.29563	141.481	173.575	126.092	132.634	133.085	200.817	122.596	162.13	176.362	158.808	183.156	171.264	123.396	123.088	131.813	125.203	179.325	205.234	201.198	135.376	159.615	225.495	168.773	146.346	126.06	204.703	286.878	196.038	137.384	181.841
15.438_164.12009	470.238	1106.12	316.08	3868.79	755.07	1325.15	1481.93	10762.3	237.899	1838.26	620.707	1250.64	1793.67	1466.39	297.638	1657.33	286.641	502.538	1311.44	190.202	573.091	684.371	1233.6	2319.22	556.505	4932.33	316.794	374.679	1460.14	4250.33
15.533_581.2789	16081.8	6402.26	6368.73	18328.3	9476.02	16003.6	6090.56	9475.73	2051.87	6677.75	13447.4	7472.63	9705.42	4885.09	6886.93	17935.6	12018.6	7690.83	18233	12227.2	30208.5	14429	38696.7	28899.5	10076.8	13344.1	15015.7	11257.5	14963.5	25644.1
6.782_402.24742	523.225	464.624	454.758	1314.75	406.883	4030.28	355.978	411.693	100317	1133.91	342.39	351.006	438.523	2740.68	325.81	922.267	531.695	375.988	338.646	364.521	339.337	368.274	353.945	368.752	402.892	379.938	376.494	414.599	385.462	369.382
9.576_182.07074	14461.8	11851.9	12945	14345.2	12955.3	12804.6	13537.6	12542.7	16409.9	14745.6	11432.5	12051.4	12407.4	10765.8	12205.3	20638	13095.1	16681	16380.3	23442.4	23275.9	28415.9	93753	99994.7	72726.7	54859.8	49776.5	32109.5	66194.9	44617.5
0.769_741.90297	12369.6	13180.8	9621.23	53293.3	8890.67	35141.8	12463.9	22426	18033.3	15466.4	3785.1	9080.24	23871.7	19180.4	7472.85	5106.77	3343.6	16009.9	428.242	398.577	908.914	386.408	7356.89	8088.91	77082.5	1733.2	553.237	4969.83	7646.32	5164.05
10.09_333.14733	3020.37	3270.07	1611.72	16710.6	499.311	9181.55	3139.68	3629.84	1212.59	2713.09	1943.08	1081.83	6425.77	7620.74	1473.8	962.08	878.405	611.786	401.58	349.285	432.95	316.256	637.984	1428.32	1170.07	1927.04	922.138	448.497	1460.06	574.238
16.298_302.22423	1100.1	813.992	1084.73	244.445	1168.47	1098.22	955.616	1691.21	328.552	1043.55	5401.82	436.153	602.069	1286.21	2120.82	1433.42	526.065	462.028	734.002	377.214	288.699	274.942	1460.38	1489.22	377.169	1490.02	428.516	1116.18	694.534	526.795
8.016_237.09992	2452.64	508.809	734.508	3491.54	712.38	4407.46	1136.02	5944.07	5978.28	1143.77	4441.07	333.753	2653.62	3225.42	3536.79	428.978	355.235	374.08	1060.57	329.629	4248.97	345.994	619.817	10371.3	372.541	536.978	1549.65	345.46	756.301	2521.78
11.894_222.12545	2661.61	3254.59	1767.94	3202.04	2384.43	1887.15	423.534	7490.11	602.355	1456.41	370.708	283.948	3413.85	1333.99	1110.3	727.149	383.329	2154.03	2774.11	5541.31	2374.09	1175.61	2611.4	621.5	705.792	1282.6	1926.02	6597.23	918.838	4703.36
12.115_346.16241	16737.8	15516.3	19049	16296.2	16854.9	2325.55	13605.2	25948.6	17751.8	22542.1	14684.7	18069.9	24104.3	29831.5	17105.8	23077.3	19190	36428.5	19037	23440.5	19956.7	22198.3	56093.8	40704.1	91352.9	33674	28277.9	28481.5	34240.9	32723.7
11.553_396.1392	38057.7	31188.7	45762	28095.6	36130.5	35844.2	28592.1	30150.5	33737.7	36097.4	31055.1	42541.6	32185.5	41856.6	41211	40366.9	47962.9	46397.8	46009.5	27791.5	29726.1	44798.3	97452.8	80406.5	49949.7	45673.4	68110.5	53969.2	62117.4	69480.6
0.711_343.97692	20785.5	33846.9	27622.9	32010.3	29570.7	11177.4	15473.9	9612.59	22007.7	15676.7	40038	11944.5	12827.5	20737.7	27205.6	32128.7	22775.2	28804	22469.1	20844.4	26258.1	25174.2	57516.9	43117.6	3927.82	40292	38369.7	23709.7	42387.9	33578
15.433_501.28543	17892.8	10832.1	8050.64	27897	13049.5	14985.9	4409.8	8577.48	60069.9	10284.6	18101.1	6072.03	13271.8	8773.78	18910.6	11927.2	14856.2	8525.55	19541.3	10639.2	32999.2	52964.2	97226.9	36818.8	26985.4	8679.04	17606.7	14236	82797.6	23624.3
8.193_246.10024	2208.7	6776.49	3527.21	3343.64	3626.41	6826.3	2558.39	5130.67	2388.15	13239.3	1606.2	8350.48	2536.23	4414.57	1445.66	2028.42	1045.62	1049.1	775.177	1863	10808.7	1030.88	2776.08	12839.6	2743.93	4726.09	3529.07	1319.06	2849.89	4560.99
16.755_276.1722	49996.3	72910.9	47058.2	60159.4	58235.2	30055.6	32357.7	36389.9	33842.3	31727.2	32499.5	39448.9	46974.8	36133.7	35384.1	44668.5	31008.6	40022.6	42114.2	37251	41775	74539	94346.3	89714.7	79526.6	42356	63846.5	28808.2	65069.3	43528.3
13.117_642.24999	263.617	250.559	231.913	4279.39	204.334	279.829	782.032	339.348	2933.43	292.12	278.416	589.045	2106.59	570.735	226.174	457.457	288.367	371.977	252.593	195.894	152.556	185.442	262.046	357.212	351.926	254.989	219.861	275.388	369.817	353.173
15.246_581.27884	348.692	544.712	627.819	345.201	351.991	746.718	314.244	778.328	365.409	346.652	508.565	376.649	1021.94	477.855	360.362	501.998	738.021	185.231	680.836	894.627	1639.3	3919.11	1120.54	1935.39	694.584	881.899	629.25	1110.38	1006.31	939.546
13.677_514.26032	288.57	360.245	373.068	2243.87	898.12	787.539	402.718	3920.58	347.917	7178.66	370.515	379.002	311.006	384.019	267.577	704.774	459.576	1742.16	313.325	341.001	1690.62	385.409	864.112	31645.4	603.787	1478.77	505.36	467.019	508.188	38866.6
9.1_175.0633	510.765	1020.01	357.093	1475.91	310.405	1199.68	409.497	614.504	1517.69	690.28	366.26	876.513	1034.17	286.64	295.851	508.438	1351.82	944.177	290.944	684.242	2072.55	1151.61	3732.74	8134.54	3335.86	1981.25	4681.46	1372.53	878.157	2329.64
1.086_309.15738	1901.08	8761.53	1572.42	34898.5	1347.4	9908.9	2119.29	10079.8	4211.49	1966.17	2292.89	1759.84	4354.48	2697.78	1803.71	26194.6	7003.03	19666.8	1089.28	3206.88	1406.86	848.65	1386.83	14327.9	294.43	63314.2	1405.36	7666.35	11918.6	6230.81
27.072_801.52904	1357.38	1867.02	1858.6	93659.3	15820.2	10745	4180.95	11920.1	5734.02	9705.46	6901.94	4224.12	6830.49	10058	3358.07	2291.02	5394.23	6150.08	4516.82	2179.38	11141.3	13504.2	13128.8	1511.53	2976.73	3609.05	2103.35	2768.12	1375.04	5963.76
13.09_229.16762	3995.83	692.052	3414.25	11730.1	3216.21	4769.95	904.502	15805.9	4009.47	12978.3	783.522	7828.91	28616.4	5961.83	417.418	36791.2	8623.98	27889.6	7278.08	348.47	1413.99	22056.9	1290.11	11658.2	11561.2	65839.9	420.35	855.467	1283.63	28311.3
17.517_134.10948	223.674	247.27	225.739	373.52	195.723	422.197	179.509	178.772	203.894	219.591	180.589	203.378	228.037	168.203	409.264	222.376	228.122	282.157	157.462	220.091	188.951	163.563	201.425	180.242	204.5	212.556	202.067	193.037	218.283	215.901
7.809_317.17351	422.687	3390.76	788.934	6795.48	346.342	12642.3	3554.02	4715.96	23339.3	2947.3	328.625	1994.67	3529.19	8264.7	2366.17	378.445	349.16	1538	330.952	314.917	334.457	317.188	899.735	389.898	4442.19	691.036	350.092	368.847	516.155	361.308
13.63_312.24098	547.403	11672.4	1904.81	7511.33	712.029	27115.2	2830.06	13954.4	289.63	7819.51	847.199	3964.53	9387.78	24332.2	959.191	691.364	621.64	8262.01	386.673	317.129	384.281	373.648	350.172	436.371	931.465	2530	318.613	410.928	413.64	358.796
8.629_284.1733	8010.44	9144.51	1808.44	1030.09	1787.47	11972.6	2233.76	17214.1	516.06	5582.78	2716.66	1892.64	27231.7	7685.98	889.843	7922.12	2693	11866.8	958.32	585.767	2380.93	614.288	7033.86	3513.02	11781.2	5658.2	527.077	3078	9147.23	4592.05
9.138_158.05786	7707.55	4363.11	4233.88	5342.86	5137.94	4952.3	3747.86	4985.37	7213.67	5043.79	4369.05	4379.75	4311.38	3514.38	5485.62	14091.1	8123.53	10836.4	9557.87	15125.2	13226.1	22147.5	91267.3	90384.8	77731.6	40311.1	38934.8	19983.4	77049.8	29364.5
10.565_207.06761	412.168	631.832	586.92	768.974	1210.97	761.434	331.463	331.731	2760.68	637.03	519.948	994.42	309.998	441.78	440.594	516.535	699.434	1143.07	1165.21	378.07	1151.32	505.718	1000.91	424.882	1518.76	1187.98	754.324	654.797	1521.44	430.679
0.963_185.06877	8382.57	12976.6	5666.88	27405.1	4767.11	6102.32	4041.59	8407.63	90962.5	8552.36	4797.33	3577.26	6221.92	5227.53	8839.93	4199.7	2394.32	8451.61	2414.55	2497.67	3531.04	4806.14	10833.8	12675.8	8660.9	7986.87	9587.92	5070.95	8570.35	4203.46
13.678_752.4169	247.572	309.065	320.066	596.143	226.329	471.461	345.504	1267.01	298.488	2576.58	317.876	325.157	266.821	276.875	229.562	339.975	287.869	452.947	295.994	292.555	230.497	302.867	364.294	24425.3	518.007	404.678	433.563	400.669	291.047	30738.9
8.501_244.12094	4200.06	9656.3	4299.73	43074	2241.16	21640.6	5228.62	18447.8	11037.2	7146.05	8230.28	9052.52	13643.8	13899.5	3887.48	5065.7	1421.9	4080.23	1270.97	1870.5	3637.99	1686.89	3791.88	6761.63	6368.92	7672.32	3211.85	2356.21	2893.23	3820.22
11.431_252.13354	2605.79	3606.82	2452.32	25353.4	6325.37	13672.7	5838.28	30195.6	6961.97	12633.2	8229.12	2015.89	7295.93	6720.69	2825.18	5910.89	3504.86	11973.3	4045.13	838.693	6612.55	2223.73	9275.05	13766.3	4182.77	7282.34	5550.83	1798.05	3344.63	24743.2
1.088_274.06764	3614.68	13201.6	6140.73	6837.86	1137.95	6962.51	7192.51	11928.8	16514.3	9162.48	2942.41	6543.88	4509.75	6914.27	3579.84	5578.96	4837.16	3656.42	2249.04	1021.03	2345.71	1859.91	1171.25	3652.71	5488.63	3213.86	1528.97	4635.08	3173.22	3067.02
15.252_798.47098	212.84	243.947	218.966	288.279	281.578	322.43	233.993	250.148	89987.5	209.257	238.965	237.253	220.474	517.806	217.387	285.377	428.743	187.418	308.596	247.893	336.052	250.277	228.285	220.033	314.048	377.449	423.323	488.303	317.094	376.903
1.08_135.10482	29367	26543	26621.1	24571.1	29667.8	13757.4	15362.9	17370.4	18835.5	22750.5	26100.5	30310.7	16535	27435	25343.1	29652	32459.5	19432.7	29913.9	26074.3	39501.1	18410.7	60858.4	51093.9	303.232	47073.8	75677.4	47175.9	35385.3	53874.1
15.279_925.59439	257.525	295.164	355.199	298.056	294.162	390.124	281.934	315.7	89558.7	256.461	289.136	384.234	316.107	282.29	406.218	345.291	367.347	265.678	373.385	221.888	406.606	302.822	276.213	391.407	379.982	456.693	512.2	590.821	329.069	390.193
15.543_240.16992	7263.92	4697.79	5593.15	6348.5	7288.91	9999.21	6187.09	8559.16	11415.8	7820.85	6271.84	6307.71	8740.42	5409.08	4764.6	27232.4	7760.47	22364.1	17111.8	31564	24022.6	48099.3	89268.8	64654	66182.9	24068.1	38757.4	9913.12	73478.1	12122.6
13.324_462.18628	283.986	374.549	271.252	343.789	267.736	474.511	250.838	380.14	257.886	311.253	265.304	268.574	274.015	285.721	232.808	595.443	277.185	328.696	363.719	259.088	263.394	288.224	516.335	346.963	343.194	335.889	598.641	307.578	440.367	335.101
14.9_384.22731	188.739	280.271	185.278	1395.92	178.546	498.172	574.979	1556.14	228.232	167.895	3235.6	277.119	264.517	260.604	195.942	784.308	222.373	302.611	209.208	181.777	218.977	198.904	182.221	212.357	391.161	507.88	224.612	223.074	343.783	512.682
15.607_148.01599	1434.09	4624.35	1751.12	2306.36	5170.42	3766.18	4140.98	4552.75	8435.56	4236.26	4735.45	4295.87	4299.26	4693.02	4558.53	1577.11	5317.26	1551.84	4860.63	1793.76	2217.2	4667.15	1327.74	1818.62	1423.06	2288.4	1390.97	756.416	4190.58	1743.42
9.74_351.04195	400.569	545.838	634.039	32906.5	969.344	4635.23	7048.51	16113.2	7191.77	347.975	44541.9	774.106	749.265	564.52	304.62	830.92	362.004	357.297	327.254	288.368	317.967	303.257	348.674	372.629	334.803	14568.5	345.772	323.478	467.968	438.192
7.712_304.08782	491.981	513.815	381.487	433.005	365.527	429.782	358.792	408.421	536.084	345.986	350.622	328.285	352.107	341.937	326.416	391.16	389.012	355.384	362.148	331.872	373.003	326.564	360.324	359.14	377.273	380.104	346.195	369.189	395.598	386.307
1.117_293.07874	18390.4	26820.8	9241.55	26185	17974.9	32634.8	14128.9	34373.2	2351.15	58142.8	32998.7	10111.1	9490.4	23895	20853.5	29172.9	43322.2	41736	22253.7	26746.3	15011.4	37365.3	35750.9	27984.7	1069.53	32199.3	30858.6	63346.1	37115.9	36505.2
9.149_143.01334	3624.86	2462.5	4417.83	3998.87	4083.86	3145.33	3763.1	2730.71	15003.1	4814.3	3218.85	3636.76	4996.43	3565.37	2308.35	12223.6	6683.94	10356.6	10609.8	14806.7	10534.4	18745.9	44405.3	40856.7	43590.7	18954.5	22907.5	15489.6	42407.7	19984
9.912_537.17844	387.227	345.809	306.072	6907.26	307.668	1983.32	1430.25	3863.52	1952.26	688.239	1719.92	403.202	601.552	1053.09	281.405	926.636	1074.5	754.812	304.177	266.984	293.018	285.701	355.358	823.177	2173.89	21757.8	349.365	504.156	3568.61	3473.22
10.492_560.19425	458.628	307.181	316.51	361.448	313.329	349.912	323.873	340.761	524.528	320.717	320.143	329.268	323.726	351.434	278.481	418.601	367.264	372.696	350.475	323.017	316.359	322.486	337.095	389.062	393.551	87470.6	392.96	359.991	370.214	391.99
16.042_178.13571	383.128	586.76	435.011	4616.33	479.132	872.308	689.775	3663.57	259.685	896.594	622.335	292.336	1415.48	899.546	270.863	1184.35	283.566	372.393	1770.8	321.123	217.173	595.775	2274.51	1090.52	431.483	4294.15	223.278	227.385	1289.17	3002.76
7.798_219.08936	35064.7	84367.7	31423.1	3465.45	21187	56113.8	30809.4	86965.9	1670.38	45735.7	41144	12605.9	44558.7	44647.9	42878.4	9124.97	4104	8080.28	7361.08	5273.38	45322.2	11082.8	43876.6	47238.3	16211.6	8797.33	15872.9	19081.3	44257.3	27429.5
6.272_288.11817	10408	513.598	746.07	307.981	410.874	459.594	519.525	4152.56	8164.57	351.469	943.863	4160.12	832.235	584.289	620.073	621.307	504.765	396.321	502.853	705.927	678.297	735.286	1456.71	1150.72	86344.6	8858.8	766.633	699.972	790.558	14146.7
0.837_162.9615	12953.1	27781.9	18371.9	55360.4	12507.7	18417.2	15400.6	19491	22429.4	18657.8	19461.5	19590.9	13613	16665.3	9468.21	5216.71	12215.5	10962.9	5202.25	6432.56	9571.69	8499.93	34787.8	12763.6	344.252	13028.1	15739.8	11722	22350.7	15514.9
11.344_287.14702	7857.38	3970.66	4015.42	3619.29	4722.77	2449.26	5254.15	4275.26	86101.8	4363.97	3952.92	7274.47	5129.03	3888.3	5332.55	4483.34	3799.63	3271.93	6977.18	3603.42	3013.28	3077.9	7678.81	5715.64	690.913	3868.43	4209.72	6050.28	2457.96	4495.73
16.314_609.34307	148.105	144.88	174.211	184.196	161.596	235.866	161.027	252.597	171.459	138.302	155.211	153.079	131.873	134.503	143.512	138.369	112.237	118.137	151.666	348.348	112.877	117.716	143.016	180.2	141.749	102.121	220.078	170.757	148.621	116.506
14.052_1163.70407	362.656	266.18	289.491	358.027	453.14	457.531	442.887	311.778	495.917	398.729	533.903	337.068	411.209	614.723	452.097	19555.4	5694.08	12156.6	17053.3	20560.4	17488.4	10566.5	47830	52006.1	25028.7	36290.3	23896.2	26531.4	13757.1	37170.2
8.979_285.19371	395.702	5068.39	306.184	13726.1	312.143	20818.5	319.723	12298.8	33239.2	22822.3	284.811	474.282	24082.7	7638.86	298.528	18645.5	24150.7	19299.5	627.604	282.817	311.104	511.95	9826.93	533.62	43380.8	346.683	315.571	1545.48	8353.06	1230.32
11.324_350.20895	452.538	434.819	347.86	401.618	505.87	478.758	389.314	403.289	905.12	333.508	303.811	412.348	414.708	320.823	305.848	914.315	761.262	750.284	407.752	348.933	330.502	356.462	398.181	2137.33	660.152	630.361	1063.55	391.677	440.996	567.093
15.098_644.41112	268.985	279.919	303.546	304.539	331.964	321.951	330.173	448.878	85687.4	673.474	319.455	366.361	360.671	311.414	299.77	345.512	301.735	320.959	258.602	258.852	304.943	300.293	564.583	575.849	446.783	384.243	635.148	391.876	300.766	542.008
15.396_276.20864	783.677	1789.79	2154.55	3060.66	720.278	4486.77	3700.69	6023.95	356.59	2704.04	6095.13	1851.7	1623.26	1834.01	793.409	618.45	743.514	562.76	274.382	358.66	461.213	393.593	981.559	584.841	846.097	1722.27	553.451	629.073	589.833	1544.68
0.768_675.87358	21420.4	10576.1	6598.45	37639.8	6860.36	37031.8	13457.5	27757.2	1517.01	16861.4	1362.51	15783.1	31028.6	16662.1	4105.9	3389.97	1405.75	9434.66	341.382	317.734	532.703	301.455	1571.37	1568.69	62293.9	980.395	354.246	3825.64	4633.26	2774.13
0.723_359.95091	44030.9	38947.2	44707.8	47148	39354.2	25005.8	30415.4	20113	14903.7	26038.8	34253.1	31822.9	28488.4	32118.7	41034.5	32914.8	32867.3	37187.3	15211.6	9345.58	21529.5	9881.83	44626.7	40614.4	9434.92	31043.7	19668.9	35700.6	38637.2	36462.3
14.599_226.05631	247.278	311.787	286.519	307.898	277.961	337.88	358.156	390.166	341.279	256.817	272.088	292.219	250.016	249.165	1737.37	1351.79	388.488	308.295	357.304	335.927	309.581	646.553	8119.7	386.549	2153.59	6115.31	1314.97	516.135	240.205	1215.17
9.215_360.11165	4639.26	9313.92	7295.48	5101.95	2524.7	9044.43	5394.29	7670.59	765.722	14687.4	10874.7	12039.2	10959.9	14139.5	5290.37	39652.2	10595	2385.57	16665.1	11650.1	6171.06	9643.28	14593.6	41143.9	3032.81	26119.6	22136	13415.8	8652.74	22569.5
14.067_413.19885	9157.5	8316.03	7416.12	5990.74	8886.43	9657.05	8896.18	6217.89	10356.3	5232.95	5356.44	6199.15	7239.46	6591.06	7836.63	49429.7	44849.4	56513.5	64755.1	70810.5	55430.4	49719	83251.4	84322.8	51092.3	69312.4	71595.8	68118.6	49006	72576.6
8.796_383.11923	10333.4	19733.4	17389.8	5142.78	8803.23	11492.5	9387.46	11744.9	736.216	10751	22223.5	20333.1	18183.9	18205.5	10042.6	80903.4	17363.9	4065.88	33632.8	23658.9	18036	26621.2	37804.4	84286.4	4288.87	48751.1	52369.3	23829.1	23838.6	44468.9
12.514_451.05463	454.716	513.936	480.531	510.331	341.929	636.841	424.294	650.011	478.017	573.465	397.529	459.882	448.917	556.216	395.016	522.663	524.036	704.72	7917.17	335.196	376.743	408.647	498.153	525.613	768.421	464.252	486.445	525.268	525.985	629.095
1.075_301.19994	2394.06	5123.79	2866.24	26830.6	1696.81	23745.1	2707.1	12760.7	20794.8	4420.27	2561.75	5288.49	11290.1	12599.4	2271.44	1811.97	1816.63	7209.86	1371.75	1387.51	1771.68	1068.72	1746.46	2062.5	370.781	1544.07	1769.8	1493.63	1595.84	1816.26
12.095_310.18651	3572.18	1047.09	37767.8	25002.9	2863.5	1118.05	17794.5	5643.2	536.743	3109.82	83276.4	14421.2	675.384	716.086	60331.6	840.808	14282.8	7814.62	1098.26	2264.05	3010.72	2408.03	1230.58	2557.2	700.811	20823.4	1698.01	3118.83	1801.76	727.89
16.732_549.40306	104.933	103.538	103.889	132.065	171.617	89.8029	81.2806	94.8394	155.352	97.9862	123.711	101.233	118.158	90.4919	84.4228	71.3801	72.9715	76.8204	66.6119	74.5231	77.6849	87.1487	164.7	104.165	81.5098	71.9621	111.91	69.6111	135.895	84.4527
7.142_330.09259	354.188	340.482	315.144	371.695	265.548	310.501	262.101	260.475	329.339	236.373	239.998	235.197	258.912	271.242	244.86	361.427	238.187	230.414	242.609	238.904	249.01	241.232	245.359	534.231	266.039	299.649	240.791	251.09	252.004	291.45
13.08_276.17228	445.423	1635.02	1131.21	1336.52	313.97	1037.76	1064.99	1388.52	912.409	831.959	1989.27	923.065	1063.2	2157.11	565.478	1360.96	382.342	399.904	720.877	573.056	430.67	243.98	473.137	1291.44	754.661	6639.87	648.605	1645.26	1422.18	605.528
3.632_116.06262	476.876	426.523	432.473	361.016	950.356	318.3	332.578	327.177	323.992	284.182	300.244	286.734	286.894	296.252	271.452	290.335	277.607	295.244	282.235	269.861	249.536	260.244	265.364	258.523	272.113	272.003	272.996	272.126	270.166	252.109
14.643_233.15447	17700.7	14181.7	12057.4	18264.2	16415.6	10683.6	14867.3	17314.3	81243.5	15302.7	12778	15798.8	14862.6	15218.2	11212.4	12327.1	8483.48	7384.42	7860.31	6809.89	7815.38	9921.45	18546.9	28742.7	18071.9	12310.7	10104.6	19979.7	9481.78	18552.5
14.672_537.21634	16924.7	5691.17	4858.31	17847.8	8645.89	24347	5145.17	5580.86	43628.2	7390.05	15610.5	3887.81	10195.1	6397.93	15948.7	7917.05	15304.1	2968.9	13363.8	12353.3	29826.1	43691.5	58241.1	21265	15064.2	6771.79	19980.4	14812.8	56109	12774.4
1.085_129.15174	20839.1	14012.9	15152.8	29013.9	16385.6	7871.86	7402.15	5505.99	9219.62	8055.44	24219.7	12326.3	5458.23	11896.7	21313.4	23216.8	11303.2	4986.41	23821	16682.9	27804.8	15012.7	24684.8	72492.8	392.679	22422.7	23451.4	14590.9	13758.2	18087.1
17.266_204.07841	27260.4	45331.9	34238.5	22698.9	22648	27024.8	20752	33240.6	11693.8	25659.7	21920.4	22528.6	25098.5	16058.2	19140	41232.3	27494.3	22883.3	31324.2	27027.7	41719.3	32843.3	52583.9	68065	42047.6	34145.3	37078	36613.9	43110	39303.2
15.777_390.23784	974.182	2512.73	3655.59	3047.12	1635.38	4322.26	7906.02	4106.33	565.935	4651.93	9565.81	2087.2	1542.07	5073.57	2952.11	244.413	273.184	595.214	414.535	357.104	689.922	237.328	717.309	1522	944.976	2634.71	1296.64	1138.25	658.132	1627.63
13.2_308.12322	13567	15372	15634.3	12626.6	18230	14973.1	13254.7	17238.6	16195.7	13396.8	12800.7	13507.1	13682.1	14652.2	13525.3	17267.5	14494.8	14538.4	18238.6	23607	15179.3	18292.1	23548.3	20671	19017.1	16594.9	21697.4	16175.1	18817.8	19111.5
15.39_334.21401	40826.2	21560.7	30650.2	12401.6	14257.7	11143.6	20854.1	9868.34	1468.8	11202	79797.6	14758.9	8820.88	13967.5	21257	1515.19	2672.16	3980.31	2841.49	258.19	197.422	724.622	3732.56	3436.74	2022.32	3413.25	1270.53	1399.55	1081.74	2297.72
16.327_497.37163	221.937	235.568	261.057	276.019	293.731	353.447	241.3	378.518	256.932	207.246	232.584	229.39	197.612	201.554	215.054	253.86	168.188	252.058	227.273	522.001	272.835	259.101	546.634	321.422	212.411	179.774	329.789	255.88	209.869	246.992
12.591_299.20931	383.376	343.09	377.769	727.536	281.032	463.028	488.718	428.999	331.051	741.025	292.18	334.742	407.008	1221.53	306.081	1069.26	1369.99	2115.88	375.779	297.775	292.169	343.704	650.626	389.017	5833.7	391.487	302.311	519.004	357.401	1481.15
13.53_654.26847	1075.13	1582.04	1730.85	300.392	337.904	6555.11	1010.13	1555.01	226.653	3638.17	1966.21	828.983	1176.54	5433.29	263.8	8711	2400.94	4247.69	5373.03	2437.18	1681.54	2593.19	2773.84	3642.62	3221.38	3073.52	402.935	994.14	9383.84	2842.64
5.302_219.11051	995.336	4697.3	498.829	25938.1	1698.23	4220.72	5453.44	14704.3	701.396	31223.6	5584.94	6887.66	4533.14	15629.6	12089.1	13380.7	25889.6	3086.25	25249.7	5413.82	1698.18	2738.49	43745	11773.4	1576.85	6207.5	4458.55	36769.6	8251	1311.18
14.65_467.301	3639.13	2969.99	2931.33	5131.35	2632.27	1231.29	2854.76	2651.88	4278.66	1493.2	2436.48	1904.21	3270.96	1934.93	1780.49	4920.97	3370.98	1151.39	6156.56	1778.89	2149.07	2651.61	5802.33	5388.7	2246.11	2497.14	3729.97	3819.31	3504.52	4696.89
9.595_197.14163	5049.04	3846.56	3476.55	2771.99	3035.05	3581.38	3585.15	2745.17	77165.7	3990.48	2798.36	5234.54	4541.88	3059.58	3241.58	2877.53	2385.44	2798.93	9732.36	2543.26	2424.03	1315.42	4715.76	4357.17	4491.85	4039.09	3001.9	4187.08	2218.17	2829.61
15.482_240.11003	1025.51	4011.47	5110.98	8269.1	3109.44	11156.2	6906.4	21428.1	426.227	6686.33	831.224	4453.8	3097.76	2056.4	579.689	3330.01	669.246	3781.38	2648.99	562.838	1042.51	1547.66	2510.74	6181.56	1547.88	6034.78	1104.68	1135.6	1517.99	7905.42
14.165_529.24765	224.581	216.689	222.298	242.395	282.615	399.828	233.984	333.201	265.298	288.083	214.739	320.573	329.437	311.523	235.947	379.835	384.448	417.709	287.49	270.511	300.179	249.69	260.691	405.124	431.261	334.365	315.524	270.433	350.157	565.935
17.197_148.01602	27203.1	9536.44	5309.59	2471.15	15513.7	16909.2	5830.71	5574.52	7014.57	1197.11	15338.1	15383.3	16594.9	14224.9	3651.3	3375.21	5057.78	13019.3	3772.25	2411.3	3559.9	14015	38996.7	22957.5	39478.2	76558.8	24769.6	11315.3	36108.7	1190.06
15.416_1076.61277	385.379	245.257	224.546	801.368	390.616	418.377	268.2	809.365	325.384	290.427	679.01	319.03	218.365	248.147	262.337	1449.59	513.936	284.618	1192.14	469.661	926.017	606.08	1447.82	1628.38	274.393	1322.64	479.757	387.115	1203.03	1752.06
8.645_238.08152	3293.72	2610.47	2351.81	3375.7	5162.75	7301.18	3221.06	6129.1	19813.9	5659.51	5392.98	4264.51	7093.49	3343.94	2121.24	30277.8	6515.17	18073.2	16364.1	29005.1	24347.9	33897.4	67038.7	67318.5	75573.1	18442.7	34137.4	7743	49690.6	6755.05
12.517_371.09697	376.313	425.322	397.677	342.609	282.973	527.036	351.137	537.935	327.545	406.329	328.987	380.588	371.514	460.312	326.907	432.544	380.217	583.211	3079.54	272.099	311.784	262.993	412.26	434.986	635.928	384.205	402.571	434.7	435.294	520.626
11.343_421.25487	740.496	783.331	6854.06	2306.68	454.621	3230.56	2109.32	1831.08	826.192	9696.83	1112.46	5215.54	5797.07	11644.3	1804.55	7924.97	1172.35	13473.6	445.038	2778.77	999	290.874	1033.66	2071.31	1968.63	6145.48	581.601	1977.09	798.757	3264.67
15.592_350.24532	1667.39	4514.99	1007.5	3587.85	298.954	780.738	1355	2876.7	369.297	216.093	4965.51	396.31	2189.88	1381.33	697.741	381.533	172.65	530.318	260.745	483.67	526.779	245.744	408.448	200.538	384.48	898.091	691.73	422.564	247.982	852.885
6.748_350.15077	423.013	375.636	367.66	404.265	317.815	337.029	287.799	332.842	385.62	283.931	276.813	283.28	266.788	282.132	265.939	319.816	282.571	303.976	284.258	285.21	285.299	263.255	282.38	306.582	308.446	312.546	269.894	335.192	311.635	298.635
11.814_432.22715	295.328	277.337	251.7	275.048	279.75	493.477	330.81	393.796	74111.9	341.696	253.604	239.549	369.625	333.886	257.444	386.778	320.66	367.302	283.126	245.314	303.528	237.119	431.832	394.413	418.164	408.37	309.475	318.888	439.042	394.62
19.751_322.25035	154.69	98.133	93.9163	158.663	95.2348	101.69	119.374	125.691	83.2814	101.756	193.779	84.2992	256.891	96.6741	77.1412	71.7169	71.3081	74.1812	77.3371	72.3962	76.7392	107.138	72.2193	131.005	84.9522	113.446	72.1696	71.6601	118.141	72.6524
11.691_366.12868	339.264	330.991	286.767	302.882	292.047	7297.98	448.042	776.81	1959.65	806.13	599.693	419.332	397.396	6350.15	252.859	722.004	378.037	435.544	440.645	325.177	286.871	381.371	1006.8	1064.1	4304.25	540.807	524.233	825.67	687.067	712.061
15.118_519.26337	423.189	272.38	262.939	443.245	242.975	384.556	241.665	414.017	315.525	259.007	427.712	268.152	295.974	297.662	251.21	252.892	192.138	226.436	398.978	194.878	750.215	189.719	238.621	264.746	327.015	389.115	290.077	416.73	228.819	384.604
13.198_487.26062	341.953	2212.1	531.697	5255.83	901.574	2165.32	835.328	7116.69	8639.01	1643.83	6742.52	532.027	1436.84	2812.28	346.101	1074.09	1554.69	378.108	738.806	358.206	1898.19	488.373	733.058	814.05	361.491	6044.71	639.451	372.332	2475.48	484.339
8.216_546.27233	298.165	283.225	293.413	275.028	241.922	282.314	232.998	232.941	332.487	220.232	243.548	235.129	224.93	236.658	222.033	259.619	215.155	251.18	215.703	216.111	227.969	208.908	268.026	257.466	262.634	261.451	225.837	241.612	287.646	282.817
14.304_358.21166	830.125	665.009	334.743	594.888	580.569	475.006	1061.22	528.865	440.765	732.713	2345.03	1869.86	476.259	649.847	720.337	596.789	321.297	802.345	658.355	438.372	418.057	323.605	1504.64	525.335	695.02	3394.26	1167.68	579.32	476.543	565.715
12.156_239.18834	3650.01	2529.27	2518.18	1852.78	1928.09	1947.85	1716.81	2485.26	70578.1	3358.38	1561.22	2034.67	4368.3	2740.98	2726.72	3325.33	1767.67	2758.9	4195.69	1625.18	1355.84	1148.32	4777.17	3195.14	2664.5	2494.81	1910.42	2604.86	1843.82	2327.12
9.007_285.08886	15617.8	13793.1	14197.4	14673.5	16506	14194.8	7966.8	15516.3	70552.9	10691.4	16964.1	8951.25	10645.7	8972.57	10798.9	14393.1	10188.1	12339.2	40903.3	9884.58	10697.5	9289.58	23570.3	20134	21497.7	15383	13732.5	13538.1	13807.4	18579.4
19.216_328.23979	156.762	175.991	444.019	902.297	101.333	196.638	206.826	329.176	87.3043	153.039	282.557	93.8064	241.224	306.965	132.724	336.267	121.377	147.716	153.659	139.818	90.1217	153.146	74.4065	191.734	73.1049	279.61	87.5449	159.688	182.702	107.16
6.908_512.14682	289.321	260.776	251.914	263.213	246.004	254.822	221.085	221.869	334.056	227.574	216.652	189.23	233.681	192.384	210.403	216.597	208.183	198.288	368.781	189.121	195.178	207.888	194.739	213.907	238.939	222.247	207.343	253.568	243.289	219.514
15.131_688.43761	179.053	223.031	201.978	209.194	228.034	295.481	200.298	308.344	70430.6	494.087	226.644	251.662	274.625	279.357	234.361	183.893	190.541	191.847	200.283	182.894	209.472	178.052	167.522	240.557	306.905	263.945	237.951	314.341	214.747	373.204
15.177_798.47098	141.936	182.847	147.696	178.218	181.172	206.696	178.821	178.722	69702.2	279.303	226.058	227.594	177.981	287.168	164.923	153.728	190.721	167.373	156.119	187.093	155.26	230.565	148.224	139.878	215.805	264.223	175.67	399.508	149.506	286.345
7.278_436.22801	2721.82	1831.53	3038.88	2917.29	2684.73	2467.86	2134.6	5297.78	69571.7	2259.55	1784.72	4235.77	2365.32	2136.33	2732.38	2924.11	1887.71	3624.43	10828.2	3322.64	2490.85	3433.1	3312.91	3780.97	3215.02	6503.44	2786.87	2128.79	2249.63	2056.67
14.459_332.19837	44444.4	7787.13	18443	14061.1	11947.9	9456.65	10853.8	3721.16	351.876	6590.06	69538.1	6991.52	19395.4	8524.19	15158.4	659.335	2608.17	1569.78	1397.95	738.664	486.37	353.273	1941.95	6738.65	1769.27	3140.4	982.328	3149.55	1588.97	4613.83
15.609_286.15178	181.398	208.262	197.6	4537.76	240.331	1478.82	411.84	1257.27	1210.63	2481.15	212.407	401.304	180.214	571.97	207.421	903.454	880.491	2762.91	340.946	231.55	223.488	352.033	1405.56	2009.96	364.129	11652.6	207.155	207.937	1605.3	5920.93
0.869_259.03696	22962	56507.6	34549.6	16482.3	26759.4	42839.5	28834.2	47776.3	23663.3	37676.3	9398.34	7492.55	36404.3	57575.1	43400.6	17094.8	11957.1	16883.1	8328.2	9469.78	10588.1	15494.5	54299.5	68485.4	1254.3	36002.8	26841	30007.8	63605.4	38912.1
14.862_2017.2341	182.289	201.023	171.574	215.24	284.526	211.7	177.723	168.808	172.906	178.627	246.872	188.593	190.144	186.918	185.033	213.337	205.305	170.497	245.571	172.672	169.191	249.048	302.358	219.084	188.448	371.671	210.028	249.966	336.602	248.107
14.299_276.12593	13698.5	261.207	242.526	321.176	335.126	358.599	6182.74	327.116	1137.48	293.843	275.097	262.729	252.228	289.153	261.155	450.536	201.548	279.658	349.512	330.942	251.864	235.561	247.467	1177.02	524.695	262.241	411.622	362.018	327.379	273.675
6.593_304.1494	11181.1	7850.11	8704.35	5201.73	10668.2	9864.5	9088.37	12953.7	66046.9	8710.64	8479.84	9158.94	18043.6	8108.08	4246.88	12926	8230.74	12566.8	275.625	9878.38	7094.4	6542.31	7534.47	9357.71	14666.8	10128.8	14383.5	7070.81	8729.01	16417
11.68_292.1209	18292.9	303.431	282.799	307.176	296.188	504.084	3344.01	434.855	885.006	375.777	279.214	287.751	403.031	387.162	260.578	384.723	383.397	441.719	325.259	329.787	290.938	328.562	419.004	918.799	476.215	328.211	336.589	329.509	410.017	361.595
16.415_316.20342	32156.6	22439	25383.7	37621.2	24353.8	13187.9	16016.5	51126.8	3907.97	6601.02	65404.6	12528.7	22572.2	13637.6	28510.6	3519.79	6923.41	2193.5	2814.11	1441.83	1377.44	1381.77	5411.86	8347.27	3474.85	1132.9	2535.58	6586.78	2436.51	6077.65
16.428_248.17735	6942.89	7188.26	5437.73	7075.93	5850.95	5000.48	4223.84	7114.23	7528.48	5206.12	5141.08	4599.73	6746.31	5089.86	4353.94	22777.5	5805.33	15108.8	14663.7	19968.9	18687.4	57767	65310.3	42170.7	52795.7	9696.35	19674.3	4730.07	56619.4	4612.57
15.929_350.24532	183.58	2368.02	2677.68	1802.91	678.404	2076.61	4933.63	1422.33	174.501	759.796	2990.47	706.687	191.482	2903.13	318.235	220.57	177.433	530.318	199.075	133.947	157.931	223.116	166.992	660.669	384.48	307.212	691.73	559.191	135.935	478.214
0.762_511.86687	23767.5	5386.78	5040.84	26498.9	2345.09	28411.4	13935	30808.4	1132.38	12205.8	304.752	19646.7	34704.6	10895.5	2995.16	1866.69	450.246	4708.99	286.568	254.882	257.096	253.052	475.113	722.714	43297.6	252.412	297.366	2717.06	284.71	1254.52
13.826_728.2871	181.828	182.188	161.042	893.169	213.098	221.071	170.654	213.263	663	225.319	210.689	177.338	905.686	196.896	230.278	245.718	253.147	260.276	201.965	232.587	202.256	174.676	257.213	250.273	180.767	207.704	262.021	298.117	183.868	263.909
7.64_209.10263	5758.92	4794.61	5782	3465.09	7969.58	4403.33	4709.93	6298.67	64115.2	4376.66	5765.01	6741.1	5855.73	4805.11	4623.46	7308.99	5766.18	6887.97	46161.2	7983.3	8335.99	4968.45	8302.29	17073.4	13267.6	9061.72	7140.55	8470.1	6062.79	9593.56
14.445_281.19878	356.78	302.717	297.756	3659.62	359.235	286.472	400.555	341.342	341.871	413.451	245.554	1062.41	1064.55	668.685	358.668	497.101	391.896	640.283	347.651	222.824	643.591	373.832	502.427	327.767	488.15	502.812	330.101	294.043	540.092	558.704
13.25_170.13065	18521.9	16730.8	14062.3	9935.99	13859.3	13253.5	11526.7	18748.6	4550.85	12535.8	11572.5	16000.8	16651.6	11753.4	9462.68	37514.7	19419	17611.3	27144.4	30627.4	26174.7	21989.3	44738.4	62745.1	31591.8	37810.8	34298.8	39029.7	27025.8	46561.9
14.057_358.21184	313.895	956.835	250.567	2047.08	616.123	1092.14	546.783	563.633	442.368	776.532	2621.38	306.577	383.82	532.07	391.31	1434.89	848.229	874.29	681.056	1263.38	865.939	1684.67	1168.31	1548.78	355.648	1982.21	1377.39	1131.95	1559.15	1322.06
15.976_306.21916	417.289	226.537	278.102	1461.87	463.109	503.499	225.462	1728.27	480.187	243.731	1626.75	307.085	498.094	148.116	188.654	2364.92	339.966	271.544	230.53	187.335	401.9	172.889	1559.97	946.671	775.949	553.376	440.01	408.42	672.089	760.253
12.986_242.14166	18737.4	409.344	425.094	355.862	523.713	445.627	7849.31	486.698	320.909	436.586	401.617	463.186	391.873	337.711	224.866	377.877	424.514	403.658	289.427	338.409	243.683	260.956	514.108	554.771	443.069	436.503	334.32	405.908	447.676	440.045
20.879_350.28166	153.48	101.731	109.183	449.387	93.8705	97.5651	97.5571	262.596	95.3147	113.708	317.038	103.281	183.328	439.783	184.015	80.8957	88.323	83.2234	98.5511	76.7152	123.98	78.9784	224.266	417.12	94.9887	113.093	98.7316	158.331	154.885	111.733
13.383_451.24681	337.369	278.909	325.732	264.187	306.345	337.497	367.645	380.635	392.112	321.075	425.039	313.461	265.051	365.503	347.151	279.821	352.071	362.643	291.485	287.699	321.398	271.305	319.225	336.545	451.49	321.516	380.679	429.636	318.892	409.806
16.915_492.30596	2818.58	4254.45	4685.09	3105.47	4882.32	2341.41	3797.93	8691.32	59863.6	3824.72	4760.27	8620.71	3204.42	2411.15	1990.91	2204.42	1681.73	3008.36	4375.32	2061.93	8413.27	756.341	58421.7	3454.44	2330.77	3043.06	2653.03	2212.01	1551.34	2969.39
14.658_232.10326	333.937	295.035	222.256	314.784	316.944	381.237	285.869	355.378	421.726	291.179	381.593	264.395	244.122	317.396	231.445	373.765	377.24	350.063	292.731	261.678	279.459	281.908	497.688	427.793	495.424	390.057	372.985	497.615	461.138	574.002
14.23_565.24759	197.07	194.869	174.25	183.686	235.231	279.449	203.338	226.233	180.674	156.083	223.393	217.332	205.231	210.233	262.096	290.223	166.584	371.021	203.439	165.21	193.718	265.749	273.764	235.976	219.785	247.364	259.091	246.549	215.792	222.147
12.719_820.37096	22744.6	15261.7	29849.5	18455.9	17580	18581.8	16169.1	22915.6	18109.6	18960.1	20358	24117.2	17743.1	18482.6	22012.3	23340.3	20380.2	19001.6	17818.1	16756.2	21951.2	22404.8	58915.8	48617.1	34042.1	34320.9	36953	30073	33203.6	28622.4
6.553_288.11817	17541.3	14584.7	10501.9	14474.4	12143.4	9520.23	12497.4	13043.4	8639.07	13480	13201.2	11144.9	13075.3	9566.05	11614.2	18750.9	11470.6	10397.7	10198.2	15372.1	15058.9	11766.5	38987.2	26270	57948.8	23127.4	16722.4	14560.5	21723.9	18538.3
6.068_249.08597	745.29	785.26	616.034	340.81	1240.46	504.416	585.771	642.444	361.461	959.361	1083.56	663.415	714.139	743.412	310.488	358.044	239.953	269.038	375.77	789.403	622.846	597.674	554.64	934.4	8863.56	1162.72	786.847	1420.47	1040.96	732.982
10.086_114.04695	596.335	390.59	482.972	272.441	471.765	286.566	548.965	268.182	361.94	779.636	415.773	829.431	548.437	772.132	508.316	1510.71	479.041	439.497	357.477	227.148	540.369	243.749	525.411	647.109	512.602	308.408	998.737	400.384	662.429	662.969
14.679_208.10979	351.957	500.987	260.197	3997.14	440.551	1016.01	380.593	3140.21	363.333	936.745	353.122	244.668	714.291	564.378	270.48	1048.62	358.29	709.209	1107.73	255.529	549.015	241.545	866.181	1450.41	800.995	4725.18	805.808	315.393	1256.6	6998.08
26.283_123.07965	6761.92	41392.3	6156.51	27864	9799.19	11747.2	7813.16	14153.9	15219	21509.3	5953.54	9203.43	6431.95	9018.4	6584.41	10377.5	13430.8	5223.63	21909.5	140.675	47184.8	13548.4	5896.74	10125.4	10291.1	11003	7572.8	29426.9	10274.9	8545.48
13.299_254.14173	299.098	280.329	279.21	264.53	306.47	399.065	355.875	400.368	297.768	319.761	279.422	247.43	334.341	452.843	299.157	339.939	306.688	309.715	383.074	272.875	277.41	303.561	306.738	485.949	4584.72	403.257	345.218	323.551	463.8	424.912
13.427_582.22893	235.996	209.504	205.7	264.225	235.369	326.906	205.1	280.053	220.619	242.908	256.284	241.978	289.167	295.298	337.4	339.982	302.993	263.862	251.387	225.401	296.529	210.794	316.55	321.948	311.025	239.323	287.513	263.248	235.077	370.507
6.963_348.17555	4850.35	4483.41	5141.79	3595.07	4067.8	3698.14	5265.96	6705.12	54282.6	4111.11	4441.86	5059.37	7286.87	3517.57	3401.74	5133.68	4620.51	6721.72	6793.16	7302.48	4858.39	4973.95	5886.55	5712.22	8419.52	7830.78	6926.52	3865.87	5291.32	7360.32
7.474_190.07758	948.559	3413.87	2003.97	1213.05	1165.25	1106.85	622.424	2602.07	3116.21	1518.07	964.936	1876.95	1991.95	4270.52	804.179	2774.16	3162.54	729.025	1184.63	1330.32	2487.78	1409.07	890.729	2494.72	1594.05	1655.07	1499.25	1774.96	1439.95	3407.04
14.734_2210.23594	165.402	164.026	117.452	160.898	186.397	194.566	178.057	245.617	154.118	132.915	204.016	220.692	140.521	200.208	168.331	205.99	185.907	198.622	217.797	338.889	312.977	152.88	272.842	256.112	195.469	215.519	157.104	314.191	275.308	235.888
16.143_458.34804	6635.06	5255.12	8859.98	3788.3	19332.1	4682.96	14966.4	8830.81	53572.1	10758.4	7498.99	12600.3	17504.9	6392.57	4434.05	4109.83	3082.39	2404.63	2468.07	1903.17	3443.06	1370.45	5741.53	5805.24	5656.77	3376.5	2779.38	4659.33	2184.56	5530.18
15.546_491.30098	181.031	162.917	170.799	176.558	236.504	179.515	169.586	193.421	159.694	262.116	185.093	203.606	203.402	250.582	200.619	255.917	258.984	151.333	185.817	225.568	152.424	211.24	308.988	192.301	305.736	183.801	212.664	477.439	188.512	445.084
16.758_276.20864	5602.95	8081.38	7915.63	3821.33	4497.73	4960.02	6861.24	8879.51	462.029	4199.99	15479.3	3411.42	3224.04	4228.96	3069.8	281.689	267.071	897.201	786.165	357.354	645.441	670.311	498.891	1677.23	676.417	880.062	1003.53	1153.71	557.908	1423.25
16.872_404.2534	4338.66	4251.28	5092.36	3056.52	5322.05	4716.92	4813.47	8980.79	51103.8	3248.32	5954.75	11787.9	5521.7	3305.07	2691.75	2698.58	2257.31	3354.62	4595.75	1845.65	7182.84	696.9	29781.9	3376.76	2769.34	4086.04	3483.62	2039.72	1918.38	2513.33
1.075_229.03829	4735.86	13105.3	1524.6	20795.2	1306.43	24016.6	10177	18131	4083.42	14588.3	8879.81	4693.63	16246.2	5319	18082.7	7758.81	16042.7	9213.03	6257.79	1068.29	1364.08	1089.5	3375.22	6439.31	19404	4077.54	1522.02	13086.6	14006.6	6716.34
7.294_392.20177	1983.59	1722.19	2089.97	2012.69	1862.92	1415.67	1724.2	2940.99	48038.8	1909.02	1202.36	2479.47	1667.97	1779.01	1965.52	773.067	2153.28	2943.49	4120.26	2620.15	2136.7	1840.14	2919.65	2690.3	4552.71	3754.31	2771.61	1916.33	1735.75	1869.16
16.897_473.37126	84.1832	75.4225	77.0191	72.9782	71.1885	78.1595	108.496	70.6009	72.1496	60.5906	104.125	66.0664	82.656	99.4223	79.7224	72.8166	72.9621	74.2796	95.454	52.4602	64.7304	51.5722	82.0529	49.508	61.5591	138.541	75.3188	61.5141	57.6215	55.0535
7.139_465.16074	262.878	234.789	233.9	227.02	197.089	205.324	194.531	193.325	244.435	170.114	178.127	174.563	192.165	175.512	153.705	184.609	164.309	169.681	180.064	177.315	184.815	179.042	182.105	206.881	197.454	222.4	178.715	186.359	187.037	189.022
17.291_318.21901	28103.8	14004.6	15220.1	11250.7	10637.3	6436.28	11443.5	13430.6	1822.61	4819.49	40522.2	9020.21	4900.61	6866.23	10678.7	2803.67	2354.72	1803.65	4875.38	1668.25	1207.71	686.239	2822.72	4103.19	1342.38	1070.53	563.715	1204.72	1732.15	1336.28

## Sheet: 360features_NEG
Supplementary Table S2. Metabolite profiles comparing between Top- (T) and Bottom- (B) weight groups of 5-month-old P.monodon (n=15/group). Three hundred sixty metabolites were acquired by negative ESI mode.
Primary ID	B1	B2	B3	B4	B5	B6	B7	B8	B9	B10	B11	B12	B13	B14	B15	T1	T2	T3	T4	T5	T6	T7	T8	T9	T10	T11	T12	T13	T14	T15
11.847_321.16118	3429.77	10136.8	6817.27	2948.75	1399.97	3.46275e+07	12069.7	3.55381e+07	53236.6	59443.5	3023.81	5653.8	162009	2.49955e+06	3330.17	10160.6	6702.27	6.2413e+06	1278.83	359.393	1275.04	434.933	17741.2	4468.01	1.02723e+08	2570.69	3531.52	8825.87	46857	10311.6
12.133_321.16117	4259.5	755444	21625	3.63297e+07	2141.18	1.27016e+07	972991	3.52898e+07	461260	3.82452e+07	4278.87	14213.6	1.50394e+07	4.41356e+07	4822.09	371795	1.93147e+07	3.55727e+07	2025.26	317.618	406.707	299.637	108204	10131.6	643459	7544.49	8144.5	901302	592882	57657.9
12.574_315.15067	10639.3	3.00799e+06	444981	254113	308.578	1.55982e+07	57311.6	4.22483e+07	1242.68	658162	5878.54	11096.9	7.07101e+06	5.20075e+06	1938.39	210908	475948	1.06724e+07	406.276	286.212	369.116	272.682	2451.63	3450.21	5.12779e+07	6512.34	560.967	33388.5	110407	6489.92
12.95_315.15064	3.55113e+06	1.29753e+07	7.26214e+06	9.08674e+06	15010.5	8.87554e+06	6.57433e+06	1.978e+07	2.099e+06	2.32459e+07	4.39728e+06	4.55207e+06	4.31656e+06	1.53244e+06	744075	8.22464e+06	1.65825e+07	1.30922e+07	35888.2	346.113	579.385	406.818	1.12084e+07	718057	4.71578e+07	39615.7	11214.5	1.243e+07	8.52442e+06	9.01942e+06
12.3_315.15068	1476.79	9959.62	2518.08	2895.11	446.209	1.72525e+06	5213.93	3.04006e+06	2537.92	4393.67	620.759	3865.86	301131	21099.2	1213.58	16016.2	5687.1	754003	1786.27	215.046	388.431	181.866	8300.58	3414.6	9.72552e+06	1077.12	1421.64	9771.23	16340.4	6702.6
12.399_321.1612	1.07125e+07	1.34038e+07	7.01458e+06	3.29436e+06	2635.03	8.61299e+06	2.63428e+07	7.83824e+06	3.15417e+07	1.20013e+07	7.45112e+06	7.12521e+06	41684.6	3.77627e+06	1.60217e+06	1.50199e+07	1.93147e+07	1.13074e+07	584561	262.102	349.124	1616.71	1.31911e+07	1.17501e+07	277999	1.81521e+06	6899.54	2.83819e+07	2.03516e+07	2.56465e+07
12.27_277.13501	511113	3.06257e+06	2.52895e+06	24846.8	15469	6.55423e+06	2.72612e+06	1.04539e+07	2.81622e+06	15562.5	47420.1	2.34829e+06	2.67398e+07	2.49377e+06	351438	5.21422e+06	794350	898122	968219	5359.27	54102	30794.1	419375	584152	2.23795e+07	15790	11361.3	1.32116e+06	244839	734098
12.493_291.15077	346586	4.90298e+06	2.52069e+06	896272	18690.6	2.2742e+07	1.2486e+06	1.81538e+07	589917	1.54574e+06	528718	2.09785e+06	4.17694e+06	582944	8846.23	3.45464e+06	927352	2.77808e+07	59290.5	374.943	6516.59	8829.39	774814	427340	1.83164e+07	53943.3	5681.87	539428	848582	625898
12.093_277.13499	41526.7	718903	474980	1.39287e+06	6159.45	350596	1.13784e+06	266773	124049	2.66966e+06	208634	160964	3.72086e+06	19582.8	9607.16	1.20708e+06	642083	29794.7	100898	142.364	701.012	725.906	4097.72	18486.2	1.19373e+06	112754	817.185	774761	116818	275039
12.847_291.15078	1.00538e+06	6.98695e+06	6.86418e+06	1.27301e+07	90521.5	2.68238e+07	5.40587e+06	9.01275e+06	2.02976e+06	9.01845e+06	8.10208e+06	7.23998e+06	2.80441e+06	1.36174e+06	237815	3.50386e+06	8.4755e+06	1.19082e+07	2.97704e+06	577.792	102899	28365.9	2.18781e+06	555681	9.0341e+06	772013	95131.8	543655	4.24174e+06	3.88384e+06
12.408_277.13503	842135	328383	137976	115310	17323.7	6.55029e+06	16203.7	1.0453e+07	10842.7	181292	500522	2.35011e+06	957997	1.76165e+07	649798	591731	31064.4	7.47241e+06	970132	2310.25	63884.9	26131.3	419375	938646	6.6022e+06	694099	79276	22508.8	20903.1	719309
11.888_277.13501	231487	28294.1	153477	1.27434e+06	37308.4	7.41202e+06	79690.8	5.03679e+06	9.48124e+06	7.14838e+06	451333	72324.3	2.51385e+07	6.756e+06	104586	84612.8	16675.4	4.86319e+06	334698	260.614	759.376	498.106	764007	6840.04	17792.3	13037	6528.44	289169	112282	223737
12.411_301.1349	22037.9	1.12189e+06	797086	35273.3	4521.95	1.88858e+07	529473	2.88613e+06	346432	324578	31308.5	46669.9	1.94215e+07	2.30884e+07	3362.07	700354	216663	8.87657e+06	10853.3	210.92	656.619	235.819	32872.8	44041	2.4256e+06	3909.4	1267.57	410262	18425.1	109502
12.603_321.16119	1.07125e+07	1.34038e+07	7.01458e+06	3.29436e+06	22474.9	42861.7	2.99129e+06	34706.2	698894	1.20013e+07	7.45112e+06	7.12521e+06	22846.1	53943.4	6.84782e+06	865033	5.62498e+06	30348.7	1.37849e+06	194.967	314268	1255.73	6.98903e+06	1.17501e+07	64889.7	5.89211e+06	737192	2.30215e+06	2.03516e+07	1.06951e+07
12.775_301.13494	1.66662e+07	5.49358e+06	4.9522e+06	7.08251e+06	26945.5	4.55395e+06	6.19989e+06	3.03125e+06	447501	1.14807e+07	506564	3.42524e+06	1.66276e+07	2.55793e+06	76721.8	6.54513e+06	1.29884e+06	3.52792e+06	23779.5	368.977	3776.8	949.635	619245	40311.3	2.45695e+06	60079.5	6467.83	2.99129e+06	320120	248644
12.617_277.13501	602491	1.26164e+07	6.14588e+06	9.59703e+06	168513	1.35273e+06	174753	3.31657e+06	153873	7.74577e+06	149972	2.72129e+06	1.38543e+07	1.51246e+07	624045	1.40369e+07	2.09077e+06	330525	14205.3	3715.1	92175.3	31688.7	288714	935323	6.60103e+06	692378	72660.7	2.26945e+06	292702	1.01183e+06
11.607_277.13498	6745.76	25673.7	13300.2	18729.1	1603.22	3.2839e+06	25975	1.6534e+06	39012.7	60760.8	4449.08	6498.74	97666.9	46025.9	18260.7	11545.8	25350.6	79384.4	4148.58	121.016	370.722	119.937	20185.8	26712.3	5.67345e+06	8568.31	8679.12	33619.1	45363.4	35052.5
12.771_335.1769	119388	298680	678198	886212	725.559	383900	1.23513e+06	812385	479865	1.29424e+06	398120	107209	20588.9	68465.5	993.52	269652	928858	5.74136e+06	65773.2	279.491	274.977	260.693	4.38915e+06	46422.1	4.29746e+06	3671.32	1228.66	296326	1.77613e+07	2.38101e+06
11.775_277.13507	1534	11768.6	45756.5	45037.6	930.816	7.64458e+06	24285.8	4.41443e+06	562077	6.00956e+06	8362.05	25498	6.08956e+06	6.28232e+06	11487	51455.9	24279.5	7.17749e+06	5381.51	242.27	424.041	377.909	36998	1701.66	41893.9	4223.67	330.887	5903.44	63431.5	2083.21
12.995_301.13502	1.63988e+06	464251	180717	2.9348e+06	674590	128647	6.19989e+06	91495.2	9.23371e+06	993221	506564	3.42524e+06	1.66276e+07	4.36469e+06	158889	2.13681e+06	700904	61387.9	759461	310.267	19350.4	3186.77	619245	2.00424e+06	44272.5	127942	2543.97	752355	1315.75	2.78814e+06
12.114_230.15183	844.506	560.552	2199.63	275743	1136.46	17565.9	2730.95	204650	3481.42	2032.65	569.013	54283.6	67789.9	65002.3	146400	40519.2	727.829	98359	270190	273.45	707.692	519.851	42372.7	1588.17	4704.57	240237	868.459	919.479	3640.93	70572.7
11.645_337.15614	2493.27	1105.29	6072.57	12482.6	2978.47	1.43108e+07	10567.4	984446	452664	119539	2162.08	5462.77	4.11701e+06	1.61737e+06	4331.09	7917.58	19481.6	1.10925e+06	20535.5	315.114	427.479	261.779	7200.79	2279.8	4.11281e+06	3824.2	1237.25	285960	18746.3	20461.7
11.679_291.15068	994.899	436.913	732.48	1619.86	333.371	28275	723.144	22169.8	948.512	4839.45	302.929	564.745	9565.9	971.037	282.289	759.961	579.432	13253.1	334.975	301.755	893.179	267.354	454.479	1095.6	4.08074e+06	339.144	296.617	1130.24	3198.77	899.085
13.469_214.15676	9630.96	908123	11936.2	2.23932e+06	795810	4789.46	1.27786e+06	2.64994e+06	279771	2.47913e+06	7826.21	717387	1.44925e+06	2.15419e+06	382489	3.09659e+06	719683	2.76438e+06	22637.4	22667.5	523448	543734	944097	2.69997e+06	2976.62	2.91588e+06	473973	337133	949210	5.57928e+06
11.75_337.15614	402.977	8979.87	38985.9	43827.6	875.686	1.35251e+07	22954.3	2.76103e+06	298354	5.98474e+06	4629.33	19613.9	3.81243e+06	6.21996e+06	13525.6	47415	26549.3	5.37211e+06	2545.08	187.411	1141.91	200.696	42880.9	945.832	76218.8	2370.29	599.682	5854.39	24755.6	896.768
13.109_291.15077	1.31339e+06	2.52258e+06	4.30781e+06	3.74565e+06	254996	8.39355e+06	2.24368e+06	1.26519e+06	4.4747e+06	6.95894e+06	2.07119e+06	4.7184e+06	5.00765e+06	485424	1.66571e+06	3.91196e+06	7.15296e+06	4.32251e+06	3.0868e+06	6233.37	168893	38327.9	790489	1.90683e+06	3.53112e+06	3.17651e+06	149740	4.01495e+06	1.10163e+06	3.26326e+06
13.21_315.15064	1.08676e+06	7.78045e+06	7.26214e+06	6.33542e+06	883309	6.07286e+06	1.92208e+06	7.29049e+06	4.57153e+06	1.32978e+07	3.91551e+06	4.55207e+06	8.81774e+06	3.80944e+06	3.01388e+06	2.35645e+06	1.51262e+06	1.88732e+06	893687	1093.66	96376.2	13568.8	2.38566e+06	5.75458e+06	8.62033e+06	2.32161e+06	396004	2.33046e+06	4.87076e+06	9.01942e+06
12.113_301.13505	5017.79	35904.1	10945.4	341910	563.765	745735	49619.2	732727	72452.2	455109	4692.65	4797.7	2.50379e+06	400481	2138.68	52881.8	84751.6	333134	821.936	198.616	262.269	208.355	6690.93	2909.14	2.4256e+06	1400.35	249.848	8899.14	32331.8	12450.1
12.777_321.16123	563059	12503.9	586037	3211.35	2.69903e+06	33822.8	362299	25055.6	1.31892e+06	82106	7.45112e+06	1.39164e+06	16653.6	38715.2	6.84782e+06	29872.7	1.29163e+06	30785.8	1.37849e+06	27609.8	844834	74864.2	6.98903e+06	1.17501e+07	49888.3	5.89211e+06	3.67224e+06	68093.8	122914	536220
12.804_277.13505	1.6222e+06	839238	6.14588e+06	252335	5798.56	14479.7	3.86696e+06	13709.9	6.17552e+06	93945.8	304904	8.96788e+06	3.69597e+06	160031	13048.4	2.23533e+06	6.82962e+06	14795	35723.2	162.777	590.333	1059.35	288714	263723	31188.7	15762	969.687	9.61185e+06	648510	3.6046e+06
12.495_335.17687	17855.9	298680	3262.91	227423	258.106	982760	4964.21	1.27111e+06	1400.61	1.29424e+06	1173.27	1328.94	35455.6	76169.5	725.822	51306.1	56047.3	7.94564e+06	396.338	279.211	297.684	305.132	4083.96	1257.43	9.82315e+06	558.155	335.398	6823.41	565824	1840.05
12.049_322.16417	583.981	1911.95	2924.01	4.83341e+06	428.893	6.76346e+06	25311.1	5.40204e+06	11415.6	5.04939e+06	785.138	1592.75	1.91345e+06	5.76882e+06	854.31	4777.22	34288.1	4.60161e+06	570.791	285.553	384.957	306.152	4539.73	1351.64	977422	1088.22	1305.72	41938.1	12027.2	8865.13
11.883_337.1562	218985	23433.3	1.51534e+06	1.25246e+06	36405.7	75923.1	61715.3	2.76103e+06	9.31263e+06	5.98474e+06	436140	531105	51283.5	5.26569e+06	168899	68129.1	36349.6	5.37211e+06	309727	292.463	264.197	241.492	2.7219e+06	147810	7355.35	4780.71	11840.2	283837	2.13168e+06	224020
12.157_291.15056	1469.01	155920	18432.5	1.28522e+06	440.188	276566	193405	9.18156e+06	11284.6	1.43426e+06	1194.17	8808.41	6.18979e+06	278041	813.278	37708	77376.8	2.81508e+06	2336.47	257.442	326.206	269.983	7624.11	6735.31	341381	7665.1	3593.88	49999.6	16868.4	6930.01
13.571_317.16621	137294	403861	367865	460430	13882.9	9.1728e+06	562625	4.13219e+06	1457.92	92830.9	255924	3.39882e+06	203682	105312	3857.03	150064	318833	6.51633e+06	340387	1030.35	8633.66	4924.72	351066	59340.7	2.39957e+06	399071	10900.4	13073.9	436966	353964
13.352_315.15067	1.07761e+06	1.88177e+06	570205	6.33542e+06	883309	3.4065e+06	2.03576e+06	3.71615e+06	4.57153e+06	1.25596e+06	3.91551e+06	865173	8.81774e+06	3.80944e+06	2.2698e+06	2.30562e+06	1.01829e+06	4.66349e+06	893687	10221.3	217280	31238.2	2.38566e+06	5.75458e+06	4.05508e+06	2.32161e+06	1.22775e+06	2.33046e+06	3.28343e+06	3.05765e+06
12.322_335.17687	507.973	3147.1	518.783	1439.4	225.514	982760	3396.93	1.27111e+06	5434.38	3224.44	269.724	713.345	21944.7	54858.7	293.123	2349.49	2144.27	7.94564e+06	297.848	257.574	289.52	226.962	8306.75	350.379	6.01319e+06	266.936	322.572	2526.98	38183.3	6861.1
12.899_277.13505	48463	54778.6	24406.9	42349	7729.58	7765.2	3.86696e+06	15943.9	6.17552e+06	12172.8	304904	411342	904530	417814	521080	2.23533e+06	112401	10153.6	649695	143.428	932.571	1483.94	525974	3.79473e+06	33177.1	556370	2188.81	208178	7202.94	3.6046e+06
13.749_317.16628	431456	1.13092e+06	819550	2.14385e+06	81679.3	3.50794e+06	1.52582e+06	4.13219e+06	275763	1.13801e+06	643465	3.39882e+06	2.40196e+06	1.70663e+06	219916	3.01771e+06	638994	6.51633e+06	827500	2168.64	18235.6	8685.73	781204	205693	2.39957e+06	884376	49160.2	218929	1.08693e+06	492995
12.28_291.15075	6542.62	598259	50197.6	579759	136.01	6.46984e+06	213145	994420	151245	232395	1764.51	3420.25	707989	131894	247.271	214504	250731	1.85903e+06	4307.84	108.416	86.4145	91.6883	42512.9	1651.9	1.47395e+06	687.636	175.843	108961	142540	185003
11.452_337.15626	366.69	1026.73	767.085	201.736	145.148	55476.8	228.705	3000.93	1029.38	477.188	217.058	1034.15	387.085	468.986	437.806	302.528	175.173	4909.69	171.187	146.108	149.237	131.941	197.129	615.054	31678.7	336.887	164.858	169.534	227.66	144.155
12.894_303.15059	595300	387198	596201	879583	22947.8	2.40033e+06	643388	728890	335507	682810	64298.1	2.85521e+06	2.36975e+06	2.49552e+06	4100.65	1.93144e+06	278931	1.21515e+06	79109.9	413.871	2548.43	401.604	85245.1	61309.3	228981	7498.01	2618.4	134158	76442	575751
12.128_335.17677	265.42	416.908	376.426	4464.11	286.36	982760	580.53	125032	1253.33	11400.1	182.901	293.345	7549.72	2171.11	330.647	465.249	800.546	1.20256e+06	272.352	202.845	257.025	204.189	1168.92	255.547	6.01319e+06	242.239	220.616	500.374	7988.92	782.435
12.268_345.16114	366.324	967.837	253.494	1262.72	227.06	938419	837.539	1.61067e+06	1061.79	2251.75	399.405	565.194	46169.6	257191	204.699	4474.79	1497.42	923944	203.819	179.874	160.005	152.121	1039.91	727.139	1.14634e+06	186.412	256.98	969.462	3451.89	782.066
12.374_322.1642	1.39185e+06	1.6778e+06	805035	5.46441e+06	360.356	951188	3.4713e+06	1.09827e+06	4.15666e+06	5.49163e+06	47089.6	920902	10389.5	456483	18033.5	2.00507e+06	3.64841e+06	1.58168e+06	70479.9	348.383	391.591	332.522	1.7366e+06	33838.6	40235	196842	1190.85	3.68311e+06	2.64271e+06	3.45634e+06
11.99_277.13498	12599.6	27349	68824.6	937844	2044.16	18811.9	109402	28865.9	62690.4	1.16364e+06	158528	28488.8	3.76387e+06	2.33605e+06	3772.89	110820	24222.2	4.70097e+06	32708.1	89.8881	567.779	614.897	3615.82	11052.3	16466.2	10074.4	835.945	7260.36	72621.8	6802.42
12.601_316.15361	32949.3	241852	55328.3	32778.9	283.912	1.54442e+06	11719.4	4.17905e+06	1360.16	146772	6644.1	1878.8	952277	1.11603e+06	1112.25	27762.9	296835	1.27903e+06	560.267	313.269	404.011	298.46	7634.34	998.778	2.59646e+06	1271.73	488.398	10193.1	32660.3	5246.77
14.349_317.16624	173710	574136	199402	957744	92592	2.84954e+06	348045	4.98941e+06	175647	1.26698e+06	809695	2.24426e+06	950144	246077	109600	2.07036e+06	1.69602e+06	2.9399e+06	288624	630.346	2234.69	9435.19	720144	145974	4.38884e+06	39264.8	47227.8	240952	996508	907666
13.629_238.15695	12363.4	74213.9	32108	190157	86660.9	181894	93967.8	508313	8682.39	463842	44649.6	40401.6	61019.5	62671.5	161.817	167049	76988.2	257270	18622.3	2678.41	70894.9	41476.3	103716	1.03884e+06	100929	302420	43666.2	31298.8	109007	1.74777e+06
12.847_279.15056	49115.5	246902	274903	200714	4573.51	372225	175874	166627	183160	671823	37074.5	513049	863710	88123.6	828.45	773074	190540	292049	89896.9	324.94	745.416	433.847	44618.1	88935	57923.3	4274.16	1428.46	127508	45288.7	236872
13.066_277.13506	15189.2	26002.9	21739	19817.6	566705	10117.1	10274.5	9782.99	26028.5	15342.4	1334.54	16544.1	132430	42483.9	1.64764e+06	41366.1	9869.32	6382.77	781262	502.475	40600.5	921.473	1857.04	3.79473e+06	21031	1.77717e+06	187690	304883	2310.12	13944.5
13.302_291.15086	508867	1.07873e+06	561648	670541	749890	1.90601e+06	2.24368e+06	604527	2.44494e+06	567448	2.07119e+06	4.7184e+06	954614	876778	1.66571e+06	3.91196e+06	495193	3.85472e+06	3.0868e+06	10372.5	252824	84581.8	790489	1.90683e+06	504277	2.26922e+06	249624	239372	117746	167644
12.977_321.16118	7603.05	8059.65	3507.78	8946.68	2.69903e+06	12065.5	14195.3	13335.5	15081.6	19825.5	5209.12	4188.18	5961.13	12028.5	121331	6883.23	13740.8	12886.6	2278.86	47852.6	844834	103674	10428.2	198202	25300.7	10926	28020.4	12834	7059.63	12697.7
13.139_301.13507	591322	164077	55334	50303.2	674590	162809	161678	96733.3	1.36494e+06	119648	8654.66	402880	3.72948e+06	4.36469e+06	1.93954e+06	818413	47153.5	80047.9	380442	789.793	22891	1593.97	12633.2	1.33799e+06	51517.6	193239	77246.9	352002	5567.94	81452.2
13.186_277.1351	2748.26	8737.39	4996.56	7611.2	1.20977e+06	6576.58	3025.55	5523.73	9597.74	5059.4	616.71	13920.3	58305.6	10883.1	1.12656e+06	15770	7164.75	4768.77	3647.31	16793.8	120210	37400.1	719.466	6357.01	13110.7	1.17584e+06	235938	9735.89	575.122	4589.64
12.045_337.15621	621510	637717	1.51534e+06	1.25246e+06	459075	8861.6	1.24287e+06	4728.47	302184	176962	1.21523e+06	1.28988e+06	133990	84642.8	2.52914e+06	1.46888e+06	786897	9825.45	814219	292.463	32712.6	21534.8	2.7219e+06	293308	2237.2	209011	290884	850618	2.13168e+06	777269
14.1_347.17687	29673.4	65392.3	51832.8	148798	893.181	1.20404e+06	229077	1.12232e+06	67293.5	367901	76608.5	92752.4	64346.7	160429	48396	100610	192638	1.0839e+06	25866.2	321.535	2584.86	1482.67	151516	26621.9	1.38731e+06	4302.73	2867.63	51101.9	128415	270912
11.623_275.11957	8836.17	17755.1	11233.5	14610.8	1126.52	963743	14396.7	68691.8	325865	40251.3	2854.03	9990.29	2.86023e+06	122460	5894.51	42497.2	7035.54	46578.2	4751.69	163.592	874.228	419.013	3924.86	9583.71	4.14766e+06	1032.22	938.841	23978.8	3902.73	7535.69
11.972_289.13509	199132	1.03712e+06	493225	959593	8954.36	1.48625e+06	613878	3.60837e+06	542741	1.22636e+06	269524	492186	1.54651e+06	420838	112696	443929	350363	3.13573e+06	214330	335.229	5016.85	1817.91	93741.9	252748	395087	202126	35052.4	385309	474951	313006
13.241_301.13505	501008	128474	49697	70086.7	1.61177e+06	100170	36312.5	73915.3	210307	77877.1	5234.33	31971.2	211482	1.74402e+06	1.93954e+06	102415	32963.3	50514.5	23660.5	6896.08	29788.3	22679.1	7364.19	17882.3	35847	193239	114966	42559.3	5008.41	22606.9
11.653_307.14564	26658.7	39221.2	8207.33	113631	1108.57	2.55323e+06	54839.6	889820	184962	217415	14718.3	49061.3	1.21e+06	161245	27769.2	45314.9	34019.3	158364	27207.7	324.751	407.049	258.419	31977.2	31255.2	3.80679e+06	15583.2	975.247	44008.3	32535.8	40711.2
14.527_317.16628	151067	1.14966e+06	1.10879e+06	957744	238040	2.84954e+06	653013	3.80245e+06	233420	1.26698e+06	809695	2.24426e+06	950144	625662	176236	2.07036e+06	1.69602e+06	2.9399e+06	516724	1828.69	48126.4	20908.9	720144	211678	3.21091e+06	583832	103176	451815	996508	907666
11.683_289.13506	3667.84	18480.8	74016	72869.8	1221.96	2.55039e+06	16617.8	3.60837e+06	44359	687626	2109	29570.1	956211	304862	3034.93	180593	8448.75	810610	14667.7	239.513	633.894	212.208	15078.6	3085.55	3.78553e+06	10745.4	1553.75	11185.1	70975	6518.03
14.337_303.1506	249961	382606	617801	127398	86282	1.41244e+06	166259	265849	118698	292387	22384.7	565972	1.65568e+06	1.88374e+06	28678.9	1.16548e+06	108810	400293	102896	328.258	7601.31	2795.06	49967.3	23806.2	407524	9293.73	2443.82	26200.5	28386.7	76671.8
28.113_239.8991	3.62908e+06	3.11665e+06	3.21144e+06	3.21677e+06	3.01811e+06	2.88594e+06	3.0035e+06	3.1705e+06	3.0048e+06	2.86677e+06	3.08344e+06	2.84034e+06	2.82528e+06	2.68442e+06	3.11909e+06	2.91126e+06	3.13516e+06	2.9632e+06	3.00684e+06	2.74501e+06	3.13899e+06	3.30077e+06	3.17346e+06	3.23583e+06	3.57641e+06	3.69088e+06	3.24741e+06	3.18552e+06	3.00216e+06	2.92826e+06
11.378_275.11959	47238.2	115804	85182.1	171592	43856	520681	165749	173681	32660.3	165540	24517.6	202552	688840	125062	50924.1	847473	75454.6	196784	102679	509.312	9205.86	3589.9	17319.6	143641	3.64517e+06	72523.4	4060.12	37662.2	28073.4	141019
13.656_293.16648	6279.4	6198.5	596433	612908	24581.3	3.47671e+06	234901	1.51748e+06	47343.3	474818	50277.5	901501	683751	43184.6	5041.7	740172	74179.2	3.40075e+06	849098	316.215	7143.63	628.349	18824.1	8929.19	897474	64617.2	4105.76	43559.6	46555.1	5750.09
27.508_218.0104	2.50855e+06	2.37687e+06	2.43676e+06	2.51463e+06	2.42129e+06	1.61153e+06	1.18325e+06	2.15927e+06	2.09751e+06	2.19959e+06	2.43489e+06	2.70969e+06	2.68151e+06	2.4983e+06	2.60392e+06	2.72816e+06	2.56016e+06	2.62386e+06	2.88804e+06	2.70508e+06	2.06098e+06	2.34233e+06	2.03508e+06	1.89238e+06	845947	985949	2.54872e+06	2.52805e+06	2.64109e+06	3.56179e+06
12.482_303.15054	56780.6	330771	98479.5	23722.4	18062.3	3.52661e+06	104299	313524	123259	83521.8	79996.8	142848	1.48464e+06	235410	56170.5	129899	122277	1.14614e+06	27407.8	159.749	581.625	154.749	71493.8	57549	167808	51370.7	2859.36	211479	304402	110975
13.846_305.16637	151258	418463	195562	186715	83532.1	1.66437e+06	237692	2.81257e+06	124886	266502	160280	147463	579370	162639	69036.9	270417	344403	834260	38579.4	372.743	8841.74	2007.44	249508	139292	2.80842e+06	125049	56945	214180	191029	290990
11.927_331.14533	387.021	1502.07	1931.51	173913	353.841	300193	1686.71	3.50126e+06	3193.15	107221	646.218	1259.78	282136	106628	670.636	1265.45	1185.85	123053	294.504	190.464	221.594	169.44	1487.28	517.726	29240	511.701	196.059	1425.55	3464.27	2023.6
12.812_345.16113	39607.4	55913.7	226863	133347	639.394	20996	615114	18897.8	275511	200786	177708	213431	12393.9	80375.2	6282.48	50843.6	1.34388e+06	15300.6	16111.5	188.218	409.162	175.559	313544	567214	30881.1	6360.01	827.419	1.87572e+06	358957	1.5233e+06
27.064_142.02398	2.43013e+06	2.53844e+06	2.9079e+06	2.52534e+06	2.62094e+06	2.29948e+06	2.2905e+06	2.39355e+06	2.32657e+06	2.36989e+06	2.52027e+06	2.43503e+06	2.12851e+06	2.50951e+06	2.04151e+06	2.74139e+06	3.01091e+06	2.93878e+06	2.89734e+06	2.7384e+06	2.41515e+06	2.32619e+06	3.25731e+06	3.35029e+06	3.40119e+06	2.69319e+06	3.17504e+06	2.91543e+06	3.05319e+06	2.71488e+06
13.858_293.16643	185024	499607	596433	612908	109873	1.28577e+06	302153	33052.2	262908	560043	248401	901501	683751	442274	73483.9	740172	338117	3.40075e+06	849098	2145.64	28113.9	15976.6	165007	132273	897474	303768	19896.6	263299	308509	160344
14.927_196.14656	189819	176083	105089	471595	310232	439193	155584	939383	54805.4	461504	970.411	504634	622183	142083	24786.7	804981	92255.7	287599	371175	47067.8	93503.9	344444	271713	580611	177572	743794	136072	80739.6	139619	1.33563e+06
13.888_317.16628	431456	1.13092e+06	819550	2.14385e+06	199241	793466	1.52582e+06	233274	275763	1.13801e+06	643465	3.39882e+06	2.40196e+06	1.70663e+06	219916	3.01771e+06	638994	688182	827500	3755.6	44022.9	19345.5	781204	205693	240704	884376	101199	218929	1.08693e+06	492995
1.085_148.03693	399350	141808	94034.1	158371	241010	568570	231568	649822	32918	376949	565527	8641.9	710499	482915	597471	596831	267674	8348.8	677487	420770	510437	16266.4	667164	1.02301e+06	128998	40007.9	1.49979e+06	134395	442065	331130
13.178_303.15057	532786	170017	596201	246596	338290	128179	704941	40979.2	643150	1.05906e+06	6218.19	2.85521e+06	958124	1.07297e+06	138839	1.92421e+06	113833	76369.9	527704	241.833	20410.9	538.88	64024.1	400026	14818.8	576967	14659.3	21034.2	32871.5	575751
12.473_212.14123	898.469	123499	482.616	100474	138633	2369.94	25818.7	178402	3674.52	255000	457.414	55136.4	394338	24924.7	408.665	462697	18483.9	89051.3	6327.67	964.383	45662.8	60367.9	67943.8	546523	1925.78	105019	38597.6	10181.4	57934.3	731793
10.823_251.11932	3091.84	25696.4	21600.2	11385.7	53384.7	497464	19506.3	28345.7	24483.8	83366.2	6858.4	139877	363212	56754.7	9632.25	648630	25643.6	77500	145245	295.57	7601.27	19485.6	4234.55	147442	38225.7	76302.4	2357.93	1831.61	8670.13	70970.8
12.594_345.1611	27586.2	227932	55606.4	288188	178.104	519873	170356	1.06363e+06	7039.24	2.41087e+06	14634.6	15143.8	40084.1	76367.3	437.549	104973	70077.2	559909	460.74	158.49	242.704	179.296	8143.16	27335.5	692019	631.287	226.105	57599.3	358957	476037
14.396_305.16633	18168.4	86728.8	102070	134879	20016.6	565034	141175	160185	13428.1	236707	83456.1	290763	144703	42461	5261.62	432744	98454.1	272947	175099	328.721	5910.88	16776.5	42449.6	112448	339613	180524	6072.31	36070.8	66526.9	161398
11.527_319.14554	859.04	1344.48	1793.22	3905.54	1091.29	785727	2446.51	880282	227447	35983.9	1116.28	2576.32	326744	663100	753.448	2404.88	9518.93	926225	19088.3	137.766	165.739	154.895	10439.5	4400.27	2.19398e+06	797.959	557.277	8495.74	12107.4	3878.91
27.289_218.01041	280933	236076	351160	1.25797e+06	333160	152975	1.18325e+06	174967	190530	286941	214580	1.04944e+06	1.07315e+06	89029	1.12968e+06	256105	351646	287965	1.37183e+06	399751	177128	217357	161271	237498	1.11964e+06	1.20568e+06	164456	134698	120463	1.04889e+06
14.593_240.17263	7594.6	13630.6	15996.8	218829	40532.1	128411	62752.2	238649	8150.19	269615	22784.1	25627.1	26909.2	41021.5	8031.93	145611	75330.2	308895	45396.1	4648.39	25778.7	41727.5	87212.7	526176	96911.9	529256	36827.6	24391.4	190399	866707
13.401_214.15679	610687	973.477	379822	113487	8988.03	4173.04	1.24417e+06	1605.69	278879	926.979	283002	710577	900.64	2007.59	380370	9130.74	709849	2714.34	472110	1027.65	732.504	782.81	28242.5	4101.78	1503.95	66382.8	18981.2	335664	1017.8	90712.2
11.867_275.11949	486525	974062	181987	576745	23292.6	89625.2	236599	930965	724679	301813	30437.7	290665	2.86023e+06	80495.5	195018	1.45817e+06	391347	138203	167408	447.424	6584.28	1413.34	12737.5	530579	502490	197157	2836.05	523838	62863.5	195124
11.774_275.11951	17883.3	41970.2	71012.6	58207.2	2380.73	47030.9	14518.1	930965	724679	301813	3595.08	27862.1	2.86023e+06	2.26766e+06	10805.7	166842	36833.3	848636	105263	141.324	1244.27	425.784	5424.22	26860.8	502490	6651.51	1424.33	38206.2	4359.64	18949
13.545_214.15682	9626.87	17897.7	9535.6	75712.8	28947.5	1.88365e+06	28993.4	2.54964e+06	5687.21	84038.3	12137.6	16587.7	35722.4	15095.9	7915.82	40615.1	40055.4	2.63231e+06	7433.21	1877.38	9582.5	10132	85588.8	213626	1.29892e+06	100569	15766.8	7703.33	8789.8	201769
12.163_337.15623	621510	637717	1.51534e+06	1.25246e+06	459075	7892.46	1.24287e+06	3860.13	459161	133944	1.21523e+06	1.28988e+06	3519.45	1883.6	2.52914e+06	1.46888e+06	786897	2896.95	814219	4926.82	84740.3	51898.3	35269.5	293308	4197.21	209011	290884	850618	2.13168e+06	777269
12.895_292.15419	154048	1.39497e+06	1.40161e+06	1.91419e+06	15804.8	2.51346e+06	674922	1.83886e+06	351921	1.92024e+06	977173	893231	847351	65663.4	34336.1	473557	1.0527e+06	111973	396074	515.652	11411.8	3170.45	264623	56901.8	1.05041e+06	211827	10720.7	644815	653818	480020
14.269_347.1769	63074.2	79645.9	119315	221754	18948.1	745417	291187	1.12232e+06	67384.1	1.02756e+06	114109	112155	56949.3	253943	47707	125830	1.11011e+06	1.0839e+06	54600.9	1248.99	2597.35	3214.41	259674	809454	1.04314e+06	153310	22948.9	916382	183663	909608
14.02_305.16634	236993	746682	227219	445621	166544	1.66437e+06	443365	2.41571e+06	251164	1.05574e+06	255851	390645	658967	487079	190887	457607	641309	431187	78268.6	1409.77	18354.7	1630.57	351323	287653	1.78094e+06	242511	105958	753612	919727	403966
12.702_345.16103	40276.8	227932	226863	421535	207.095	169284	615114	42085.5	275511	2.41087e+06	108824	157722	30858.1	76352.5	963.756	99830.5	1.34388e+06	155783	1147.47	129.059	192.548	138.881	216104	88533.4	44402.3	2417.99	451.873	1.31983e+06	358957	468263
12.43_212.14126	40836.3	123235	11431.1	100288	138366	1110.52	25598.8	1121.09	3527.77	4595.77	4997.06	54961.7	13112.9	1318.6	12434.6	459530	18295.5	670.512	1336.88	918.034	451.036	60314.5	67646.3	543708	1180.24	104926	38543.8	9819.77	57704.3	724848
13.156_335.17689	36722.8	52070.7	16686.9	72480.2	137945	38038.4	33825.9	123061	176970	344684	98487.8	323646	15252	10341.4	88710.7	112808	26145.7	1.30946e+06	154780	889.831	3125.34	2347.65	331198	134429	1.10967e+06	147678	916714	160693	1.08122e+06	119955
11.603_278.1382	853.866	3419.89	2250.99	3093.12	318.671	396348	6670.06	221988	2500.39	4704.57	969.186	1709.94	384501	8350.58	1467.81	4000.79	2772.04	16282.6	660.199	183.54	223.929	169.276	2308.32	2281.75	632879	1941.95	1070.02	4422.25	5592.06	4035.31
12.188_333.16108	13790.8	68007.8	62903.5	240719	1097.82	10349.4	131269	11591.8	62899.7	14298.9	64363.9	60986.5	152772	12486.7	9023.18	88123.2	127377	7621.38	45634	226.545	1870.78	228.046	234801	17259.8	26523.1	25736.6	90092.7	110511	2.34751e+06	130085
12.295_188.14117	11253.7	43101.8	14583.1	65492.4	74824.7	156577	18861	59549.8	11270.6	157635	8986.4	99093.5	362610	9461.38	14848.1	335494	14482.8	54938.4	204392	4007.91	18432.6	120762	23708.2	289814	34003.6	198645	13804.6	6085.49	32954.4	306676
11.683_333.16109	123.515	2079.25	1389.52	4248.54	164.357	517710	1128.53	594929	2150.81	4826.3	756.577	1166.5	26197.1	2357.15	196.719	731.979	1218.82	411659	384.322	144.059	166.897	140.209	1103.7	1097.81	2.04242e+06	323.332	157.249	1078.22	1410.11	1206.34
13.203_302.13827	248640	24539.6	9614.53	8102.66	274551	21462.3	5985.6	13807.2	25854.4	11213.3	1992.13	54289.1	9598.11	444127	246804	34851.6	6765.46	9986.82	46354.1	643.316	26981.3	978.086	2264.45	214554	8366.99	37978.7	21796.7	89680.1	1351.76	4313.38
12.055_275.11953	486525	974062	27473.3	173871	46504.3	1531	236599	19972.5	50781.9	159075	29592.6	290665	1.95635e+06	636333	195018	77402.5	391347	214893	167408	1369.07	21887.8	5192.83	14064.4	530579	1990.25	200326	21468.4	523838	34287	195124
15.168_172.14622	121331	74733.9	57008.6	184709	85017.8	103074	63456.2	123600	41192.3	58266.6	39048.5	173839	104887	42090.4	35320.8	159783	28742.8	51644.3	97778.8	73293.7	48370.3	125771	65545.9	141140	70019.3	283419	90321.7	76003.7	58923.2	127754
14.459_303.15072	855353	382606	617801	205878	78270.2	16731.5	505123	18865.3	149796	440242	41036.8	565972	1.65568e+06	1.88374e+06	31615.2	1.16548e+06	134491	5557.82	157088	723.819	11937	794.504	38960	73402.2	17972.3	38128.8	4260.1	122017	14274.2	147386
11.773_319.14557	135863	259170	105098	716879	27565.2	21002.6	499670	880282	482465	1.15186e+06	139858	98103.2	326744	663100	106213	439009	751863	926225	56902.3	775.203	10564.9	2621.66	436732	446785	7305.12	212251	123881	892163	769963	654290
12.449_345.1613	370.724	49378.2	857.553	3472.38	174.39	380517	690.835	343716	633.937	357815	189.239	508.347	28425.9	257191	220.312	6677.78	12473.7	923944	180.113	132.324	144.333	147.945	1726.64	345.387	692019	222.066	204.269	12865.7	4229.41	2895.47
5.37_204.08949	166.24	1537.53	143.754	7986.85	149.987	9441.05	6458.58	1339.97	1.7101e+06	8877.01	144.881	148.989	924.745	874.823	134.481	146.266	150.647	153.258	162.235	147.378	149.429	155.85	5723.59	163.67	166.95	153.81	182.667	178.104	160.957	157.677
11.989_292.15401	829.692	8154.29	4294.95	7832.26	786.127	1.29183e+06	4897.12	1.28259e+06	1957.84	47636.1	977.345	2427.44	734760	48574.4	1241.95	1620.28	7455.72	651928	1787.56	523.396	705.597	579.781	3818.31	1739.75	239439	2339.39	827.16	4688.36	18050.3	897.447
13.148_279.15066	13874.7	120910	40484.2	54917.6	54665.5	7824.04	49863.1	1315.45	243224	208337	37074.5	679752	248235	19922	48592.3	243217	18576.7	1624.39	185739	186.374	6954.45	30152.9	47440.1	248430	1584.02	315169	15129.5	51966.3	14059.5	49143.1
14.184_303.15082	54841.1	76516.3	116560	18250	11055	1.41244e+06	166753	395020	20375.3	320422	2023.93	196398	736019	182155	3063.53	540962	29067.1	398170	35547.5	232.056	1823.06	2082.67	15339.3	23945.5	407524	23179.4	2104.07	8697.41	11193.1	20564.7
11.89_333.16078	639.457	2983.58	1689.05	27353.2	281.818	517710	2181.7	594929	35014.8	390051	805.027	1864.21	73039.4	83388.9	738.546	7272.27	1447.14	1.20254e+06	745.719	179.888	209.29	203.672	2513.53	467.131	19928.1	380.552	217.996	2035.75	4349.04	5456.24
13.343_214.15673	498.258	1745.45	379822	4567.1	2654.47	3769.59	1577.48	4519.93	3975.34	6135.97	283002	1598.02	3340.86	1996.42	1313.11	3602.74	994.644	4030.01	472110	1402.15	1157.01	1276.49	1777.35	2804.92	1942.79	1992.79	1418.44	1050.64	1857.3	7482.55
10.784_270.05311	17910.8	50902.6	20733.5	345159	51069.1	147829	177513	333023	144250	19037	499823	31763.1	32654.8	35490.8	5500.49	6238.56	28437.3	9855.27	5884.44	1704.99	3935.75	649.747	479.023	6073.35	3637.17	269354	1914.09	4518.38	10439.4	7408.42
12.399_230.15173	5450.26	2274.64	28584.7	25680.9	11797.7	32217.1	5848.85	203362	12713.5	12498.1	7130.97	70456.3	113643	71379.1	163361	66961.6	2199.36	113271	171051	1458.55	28420.5	25534.3	50668.4	68198.6	11865.9	240129	21938.3	1944.27	10132.4	108401
14.557_361.19268	3060.33	20009	55655.3	57198.8	6428.18	309118	96116.9	222067	6839.8	185286	222305	40086	5870.1	7977.87	4693.36	72718.9	111332	1.59934e+06	12100.6	237.49	674.453	310.418	761018	4230.04	1.57514e+06	42275.5	11668.5	253623	1.4705e+06	237602
14.704_361.19266	5194.23	32489	31284.7	70470.7	12025.9	309118	92927.9	61964.9	10365.7	151719	222305	55497.2	8076.6	10356.3	8751.76	110348	110458	631285	42810.9	107.305	1313.78	617.928	761018	10890.8	1.57514e+06	32418.6	65851.3	136783	1.4705e+06	237602
11.286_243.18358	127098	71905.2	74609.7	54527.5	73269.9	80942.7	86995.6	75445.3	1.54578e+06	80691.2	60227.6	114236	98590.9	66560.6	77243.1	74763.8	60933.8	79490.4	102498	57005.4	48307	43069.1	63177.6	75189.4	69957.2	70824.2	73677.8	94088.2	47524.2	71503.8
15.856_222.16197	6176.8	9467.81	8155.07	75079.2	94189.5	32918.3	19065.6	63390.3	4515.87	27665.4	1991.67	26313.4	11167.2	6673.68	1158.21	50125.7	2997.44	18861.1	17043.6	1756.95	6596.78	16261.1	13682.1	92941.4	5102.66	372794	4669.14	1890.57	23979.5	122030
12.69_303.15027	51862.8	84063.7	60872.6	879583	21980.4	297034	35905.2	118707	15533.5	682810	77579.9	30677.1	1.48464e+06	1.34159e+06	59692.3	373359	24629.6	1.14614e+06	22311.1	385.738	3974.89	678.757	17949.8	57549	160475	56997.1	17255.4	18303.1	58784.2	26503.8
11.95_275.11954	486525	974062	181987	576745	21483.3	110784	236599	279940	21146.5	23729	32701.2	290665	156751	636333	195018	1.45817e+06	391347	138203	167408	447.424	6916.74	1496.31	14031.7	530579	2916.07	200548	2777.14	523838	60850.7	195124
13.902_331.14552	123159	280526	164026	213160	19439.9	258671	224655	952116	38128.8	792125	147969	513752	732529	219121	51850	336208	239148	262563	66863.7	194.076	4493.8	4626.99	254689	112403	1.10082e+06	42887.4	43483.4	223709	226506	174325
11.968_333.16099	710.409	3477.59	3936.92	30730.1	361.719	18846.2	4958.33	29375	10871.2	390051	2268.67	2602.84	18725.5	72713.7	1379.2	2778.97	3196.44	790885	1294.73	118.692	134.181	130.067	6801.95	778.438	8176.4	227.468	851.683	2256.22	272454	21618.1
13.7_331.14542	10087.6	8066.86	18486.6	33536.9	2862.5	404792	77100.5	1.36098e+06	5423.44	52581.7	3600.66	18760.1	210391	18073.1	5163.35	10576	52604.1	518523	11063.3	417.248	726.007	362.845	12741.4	37303	433558	2624.78	4992.29	127342	118375	131287
15.969_198.16215	32004.5	23628.8	22461.1	82332	50575.8	71669.1	38141.4	110974	9966.12	84371.1	11394	111256	48505.4	23006.5	12792.5	288026	20562.3	40894.6	180234	23968	30810.3	136633	80216	207400	30502.1	804236	43834.5	33441.5	97176.9	400611
13.456_291.15092	508867	50938.9	39731.2	57475.1	749890	139756	35363.2	68801.6	36314.9	82391.7	37060.8	749388	103498	53635	560.116	95829.1	33114.8	74202.2	53659.1	19520.5	118982	65523.5	12671.2	14039.7	72612	14165.3	249624	23169.5	19150.6	16222.6
13.002_345.16115	23279.1	4964.45	3197.34	7032.94	35303.3	9668.14	11120.5	15867	109755	56579.1	8967.95	52003.7	12296.4	76022.3	90227.2	15234.1	9424.23	10210	29542	503.74	4827.83	295.092	6803.21	1.36029e+06	13404.1	160656	41716.3	36542.5	5378.83	253210
13.116_345.16119	2796.86	2335.99	731.582	1744.27	39397.8	6053.17	4290.89	6719.1	73424	12825.1	783.078	1482.76	9299.64	24581.5	44545.8	1234.16	7932.13	5225.45	12755.6	503.74	26111.5	1697.4	3813.82	1.36029e+06	5655.19	160656	40077	5187.14	2432.73	5931.91
12.444_323.15669	393052	476675	221995	165114	452.009	28955.5	1.01165e+06	5312.9	1.1901e+06	536898	274498	260561	18425.4	130269	55825.9	559661	930251	432355	19332.9	335.78	625.604	366.954	768435	432390	5707.99	54636.7	31253.2	1.03748e+06	748040	957655
4.051_165.07886	453.405	1572.22	3941.95	24796.8	1434.6	11279.4	4906.51	1247.66	1.35029e+06	5606.08	1193.89	3450.6	605.327	3924.14	4798	204.816	187.185	181.82	167.224	260.494	329.591	177.358	746.427	184.578	708.356	203.611	249.741	242.052	386.091	211.536
13.605_214.15673	7795.77	22927.7	3215.55	172276	26409.5	51309.2	47884.8	117883	7336.05	244371	2345.91	23470.7	30813.7	43272.9	4671.45	123063	45220.8	97687.9	2591.42	2640.38	13899.6	19672.7	85588.8	213626	77396.9	162954	28774.2	10386.3	142813	421439
1.222_148.03694	129442	33761.4	22228.3	20769	83544.6	74294	43435.4	64455.6	2730.37	63884.3	137996	1921.19	110221	78161.5	168797	128402	85180.4	734.027	300946	228898	380901	12964.5	186609	809857	6496.69	12475.6	398277	28791.5	313626	232456
12.6_303.13081	69230.1	357413	30882.1	186160	2479.05	531815	52752.1	97336.5	10014.4	382153	3496.98	8660.05	850087	1.23782e+06	2048.49	322869	9672.49	726279	1204.44	576.966	744.091	630.531	6442.76	3253.5	160714	3236.87	2533.32	12057.5	14572.6	5745.17
13.334_277.13511	1589.2	7180.84	4164.47	8922.47	1.20977e+06	5630.54	7690.54	6174.16	5877.64	4596.61	335.44	9136.66	41678.4	10002.8	1767.26	14593.4	6502.39	4211.02	1431.25	31894.7	126623	47444	487.629	5137.71	12956.1	983.245	235938	9500.58	665.083	4034.56
12.207_305.1664	3338.85	3162.38	1146.5	6346.03	490.26	15906.9	11084.7	18721.6	1.20064e+06	27299	458.998	1046.98	2590.13	2091.48	594.904	14094.8	13633.6	5196.46	4043.83	224.172	231.73	224.15	7533.91	538.511	7372.59	2567.54	246.005	9319.73	10957.2	7068
14.27_170.13055	60846.8	37683.1	30112.5	73939.5	34980.3	109719	31482.9	66235.3	13483.7	72702.8	17694.9	94732	93196.1	22564.4	14407.8	162673	22010.5	32633.1	91556.2	66663.9	50642.5	113702	51414.6	228142	45555.4	100553	65713.1	67647	50606.2	240846
11.547_309.16137	183.604	114.731	486.023	902.106	129.026	267692	285.235	1248.61	3212.65	246.13	303.722	265.263	8984.84	1012.62	121.253	320.704	285.521	280455	139.777	113.227	139.99	130.831	577.863	488.385	467556	183.472	191.439	716.221	457.905	1000.55
11.963_319.14553	36431.7	259170	7438.93	79482.8	5328.38	4201.5	93558.7	1228.87	482465	1.15186e+06	19951	12238.4	15233.7	14535.1	12487.6	439009	751863	2672.09	3176.2	52.7678	981.497	1471.27	56114.5	446785	1311.23	10851.1	80425.1	892163	102156	654290
11.611_331.14532	4252.31	23969.9	484.424	77402.4	6128.75	16878.3	536.029	105948	47038.5	153105	17468.6	464.424	3838.93	4981.01	1181.76	24039.5	19858	382543	1222.4	137.216	137.244	106.61	1845.35	7328.04	457697	4077.14	28469.5	20156.3	680111	94168.6
14.394_216.17258	2520.77	5973.14	6098.52	112004	11014.4	12601.4	13983	29942.8	6034.51	56185.1	4421.23	9559.82	9550.09	6398.29	3073.41	63028.2	40230.5	23757.6	23505.6	1450.4	4033.7	16792.2	13569	34478.5	19500.2	256820	4137.76	4752.1	18041.8	132149
20.736_667.06831	17913.7	2210.56	31541.1	39909.6	43819.3	10916.2	22048.7	17850.2	92977.1	2359.95	18623.5	7284.05	8585.4	8412.3	3496.02	986.552	1504.37	2681.61	68518.4	5741.71	6317.56	6022.38	75434	2174.83	6300.6	21905.5	21040.6	46214.8	4094.63	32491.7
13.571_305.1664	4555.71	57604.5	42261.8	127275	5107.74	145675	60962.7	728532	9160.91	88309.4	17717	70671.4	50959.8	26281.5	6270.06	56385.5	69349.8	55241.8	7603.14	164.387	2656.99	304.468	63320.1	12524.6	832905	25084.9	2423.42	36880.4	112682	10062.8
11.83_303.15063	108.366	149.282	153.489	2897.66	106.342	414713	178.392	963698	4296.95	174573	127.564	203.307	67250.8	134777	123.574	249.049	301.784	434580	174.757	109.164	171.012	141.377	166.302	162.903	981160	149.403	142.562	155.281	165.693	185.296
12.197_307.14569	87619.8	1.03855e+06	494061	969653	36036.9	242316	618587	30897	50032.5	563280	98012.2	493050	909940	44728.5	93955.2	45390.1	352250	23146.2	51860	690.772	6966.51	1538.16	193242	146115	210474	202239	16940.1	42722.9	476137	314623
12.254_289.13509	96551	1.03712e+06	165705	959593	37261.1	287777	72209.3	195837	84827.4	103537	105394	492186	822380	124374	8378.08	290073	350363	26560.4	55148.4	615.378	7603.56	1491.86	191750	148813	208916	202126	17370.3	82702.3	66854.8	313006
11.704_263.11951	820.546	3526.44	1897.38	1514.21	114.529	4538.99	1070.97	336129	35740.4	35743.1	739.007	1682.62	1.03159e+06	571484	914.45	5147.69	1825.97	161258	439.109	109.969	137.343	115.381	206.842	274.458	8114.73	462.538	109.074	594.742	204.037	521.597
11.608_263.11953	302.211	798.476	1566.03	632.803	106.558	411157	1777.72	1840.35	9823.17	2653.45	616.737	1063.13	215170	16966	439.486	3587.12	1064.69	53901.7	607.777	129.198	129.225	100.381	146.929	299.066	126379	335.776	126.999	679.905	337.639	435.764
11.276_287.11942	50170.5	179724	161659	108130	15520.4	545681	111460	739445	139997	170629	43785	123169	124976	130565	16705.4	52411.1	51124.9	170288	15696.7	407.748	2393.11	1291.53	33193.9	14120.1	242581	20931.5	9480.6	45620.5	66490.6	45587.4
27.061_388.0339	528999	666352	524902	580744	594826	483631	499460	498580	442588	471095	526030	521188	563876	525590	505121	741937	724998	619876	688546	659377	724140	685250	707088	793824	884489	832390	740858	719204	653718	747593
6.887_132.0784	113893	165702	83396	521949	109630	203181	194849	248269	176627	133585	92503.5	111453	176727	200332	102675	383904	150355	42816.4	227189	140317	489766	87231.6	130948	867933	143020	158792	172295	108137	343727	312626
7.033_132.0784	59089.1	272322	70811.7	323774	206221	128654	135927	104349	110793	123017	61058.5	34418	128294	64633.5	90399.6	133344	105635	10556.6	122178	43365.8	340079	16530.1	55033.1	857671	57982.8	136346	103583	27054.6	431823	287973
11.131_289.13509	4549.35	203734	93703.9	51787.1	2448.2	217534	89811	553737	30784.3	126167	15136.5	56031.2	49795.3	18621	18250.6	20130.6	77892.4	241427	34195.4	225.547	1589.78	279.377	80847.7	52063.5	485326	40175.4	18082.4	27028	446133	66078.6
11.473_307.14565	353.629	13274.4	7055.47	19058.8	171.218	284510	12552.2	43801.3	1974.77	5706.24	3230	6671.89	305305	149188	10130.7	2440.38	12134.1	101136	498.443	156.61	172.291	167.133	4580.13	1474.19	227351	807.648	1901.88	17390.8	5877.91	2726.01
13.332_359.17694	3413.75	13501.1	38246.6	70660.3	504.854	109363	36581.2	134784	8719.66	46435.5	337775	25942.2	1548.74	4003.14	505.433	20539.7	32604.2	615618	6916.89	241.325	415.593	280.674	331203	2690.22	364807	951.355	11456.2	251103	826047	93595.5
14.612_305.1664	18104.9	3439.23	31422	68603.2	44019.2	109287	82150.5	32795	24510.6	171110	17422.9	104807	60540.7	27786.7	7806.86	251720	90365.6	25647.4	79102.6	622.172	5492.46	29310.1	27738.3	127004	20774.6	121425	5571.79	23605.8	63135.2	161398
27.063_306.03063	538690	693183	567365	593193	593144	497851	505853	517309	460800	471935	562160	516737	575528	565267	536526	737033	702548	659185	671685	641111	713981	675444	679647	817688	770118	792817	709543	700274	670230	775269
11.403_309.16122	183.174	141.441	170.983	146.364	141.755	3595.69	151.195	203.857	248.269	177.186	161.649	167.12	150.034	388.77	164.851	253.773	188.917	182.572	167.184	173.009	133.907	285.245	179.773	143.382	179192	156.824	161.004	157.608	321.826	168.883
13.652_337.13827	8913.78	18078.2	3196.43	15063.6	5309.67	173132	64378.5	280299	49246	12896	34593.8	23724.7	63837.4	169405	591.275	5374.05	67663.6	493574	7907.33	154.333	170.984	175.696	3797.92	11917.4	231242	13158.3	226.807	43064.7	105413	4347.67
10.858_263.11952	1711.91	10699.2	125607	31649.3	1194.37	792341	45137.1	76048.5	30291.8	23121.9	50540.4	58100.6	54836.5	30717.8	7014.06	42020.9	7245.91	162668	76004	317.501	2817.1	260.678	2696.11	1974.7	8284.68	11076.2	889.945	428.647	11395.8	1381.66
14.042_331.14564	123159	144575	163175	48399.9	32434	243751	224655	15318.4	57024.3	792125	68826.1	510914	304263	219121	66533.6	336208	239148	257976	42304	420.287	9665	8116.86	254689	96627.6	52867.1	37729.9	58584.6	223709	226506	174325
12.252_331.14521	13631.8	34456.5	7297.44	380660	322.759	1887.14	151680	8762.37	48187.2	134268	3248.39	15171.3	295942	2736.69	279.841	14893.3	29514.4	2509.17	569.123	139.269	137.055	127.546	70160.6	1570.71	2345.06	312.284	271.359	101701	107451	79391.4
16.821_224.17761	1639.54	2177.62	2013.37	19551.5	36679.3	7261.78	5586.26	12466.4	2250.95	8082.46	1593.58	6451.56	2074.09	2258.67	1102.54	16789.6	3789.07	7041.04	12190.4	3814.34	4496.81	9376.45	8490.76	25614.6	3780.71	276485	4499.48	3380.37	27250.7	33070.9
13.86_337.1384	80933.5	83488.5	58279.7	140130	24610.1	2857.75	79552	1588.51	169512	145821	50477.3	22607.4	48583.8	120256	44986.7	205877	97762.7	13690.8	82327.3	309.087	3136.89	2046.98	83753.8	126350	231924	19315.4	7378.65	78466.2	106683	120606
5.106_242.09047	29975.5	102465	23498.9	110861	14763.3	49452.3	46430.3	87470.5	77214.3	83287.6	31945.4	21501.2	41924.5	74797.5	30150	53182.8	43604.5	20330.9	13947.7	9349.6	13109.8	9057.23	5993.93	43241.4	26631.6	16659.6	8815.22	54158.4	32923.4	59453.7
11.372_331.14539	4555.69	26403.3	27372.8	80469.5	6128.75	214827	57250.7	135658	48933.4	154962	19199.6	22492.5	5388.39	4449.48	1450.32	25169	19663.1	382543	1979.23	198.591	196.326	162.622	179395	8295.45	554519	5003.51	29259.6	20945	680111	95033.6
12.467_279.1505	4252.61	26374.3	24835.7	2263.9	901.022	679127	11569.6	112254	20626.4	8669.33	16549.7	24664.8	274070	71541.2	5198.21	10186.2	1588.2	207555	10878.1	233.178	287.598	254.826	14049.1	15423.5	112837	4728.09	1276.82	25817.8	17965.7	19094.5
13.541_359.17695	6171.39	16171.3	41967.2	20166.8	5019.14	109363	30343.2	83422.2	17357.3	52123.6	184538	28182.8	983.64	3304.4	4549.57	19737.7	37273.4	379541	12416.3	149.326	238.338	306.902	187884	9996.14	257402	20840.1	52998.8	156101	676388	72828.2
16.082_198.16215	4628.05	4499	4260.68	9950.21	8736.69	8455.37	4224.24	17210	1753.41	8848.11	2460.39	11106.3	8988.71	4030.25	2509.13	32507.8	4720.3	5067.01	19471.5	6509.79	5522.31	16348.9	11880.5	24822.6	4674.66	116504	6859.02	9503.02	16226.4	41942.3
0.67_142.02399	143197	186637	168662	313316	120163	248041	175623	198803	601383	163092	122811	151967	201472	199467	121420	139039	139556	222662	79655.4	58168.2	100487	63485.2	151190	143256	323864	140587	105312	115884	172939	132843
9.09_194.05792	8360.47	5120.55	7661.62	6895.17	9079.38	4748.63	4986.87	5399.52	45406.9	6126.95	7651.79	7366.16	9697.49	6455.5	7109.55	10584.8	8082.65	7799.88	25237	12562.5	14454.2	7851.51	23495.1	19862.6	10572.8	23735.1	18737.4	21495.5	11767.7	21545.9
27.064_224.02737	481831	523777	507250	509615	484594	462551	462616	470296	415796	425161	456169	405963	494553	474983	444783	583284	563061	551869	574552	468213	517276	515652	547556	581057	559318	596286	566641	518172	506260	566009
11.735_309.16133	109.591	7179.13	2185.23	29587.2	126.351	4927.73	3092.52	106973	61846.4	77729.9	1707.66	463.259	23295.1	5104.54	179.666	14684.2	998.807	595148	15209.8	99.961	106.868	101.33	76002.3	3472.78	34874.6	275.892	11336.2	1745.83	297684	51184.2
11.86_309.1613	9612.25	18031.2	52613.2	110022	8364.83	36943	54961.3	42474.3	61846.4	54682.7	76216.2	34596	23610.9	2355.05	5649.39	25929.6	17450.7	595148	37986.2	112.405	1887.66	451.952	113115	8706.5	41750.7	9337.48	37829.1	34788.4	524137	129820
1.091_204.08974	962.368	2666	1790.36	7891.78	952.399	5764.41	2846.06	1910.78	591490	3542.05	599.605	2404.52	835.653	1997.94	1283.31	628.657	558.272	549.642	620.02	591.986	263.695	812.72	2383.7	655.05	1517.31	203.909	275.968	169.191	883.39	676.807
0.906_257.06712	2829.37	5369.19	3747.97	102360	1745.18	4337.19	1801.18	4719.16	586002	4493.5	3297.24	1545.8	5310.44	4076.13	6668.01	1570.26	1251.46	5017.32	1134.49	1947.99	1543.85	1695.38	4658.1	7475.12	21481.3	3814.33	5009.14	2392.21	4504.09	2219.33
13.861_291.1509	283807	102227	29291.6	93271.8	13261.6	62483.1	64608.7	42295.2	104337	203506	20435.2	42286.3	272030	203104	40156.7	92211.9	72040.8	61451.1	7945.28	273.087	3320.47	867.887	33227.4	86797	135940	18237.4	4770.91	206674	17201.3	61439.1
14.74_345.16111	78250.8	79107.5	47477.7	85808.5	25415.6	300543	121851	157499	13627.3	252286	47603.3	133581	232040	214089	82474.8	140143	166016	211112	66582.6	297.222	4498.52	6250.59	106879	29402.9	270678	18169.1	40419.6	76627.7	50961.2	54418.8
11.809_263.11944	934.281	627.816	68567.8	24710.6	71.5306	555.635	10038.7	2393.43	122416	80210.3	1697.01	67069.2	1163.07	571484	3595.47	132813	2178.56	161258	18779.4	73.4294	90.9885	95.8478	390.661	935.369	1969.84	2108.71	132.169	1453.91	1265	2776.62
11.466_295.14559	19105.8	40502.2	51470.9	309816	11498.9	175440	134431	132588	306965	416346	21214.5	67098.3	145778	50508.5	29888	88955.1	98831.1	89262.1	31845.9	140.611	859.764	844.601	110126	75372.4	207049	40105.7	18339.6	196656	76195.2	126564
11.985_324.1598	589.011	943.544	765.961	15373.7	635.479	302667	773.785	292590	1439.56	64766.8	790.054	746.321	78402.1	148068	1003.95	2636.37	13094.7	191091	730.456	419.78	481.605	468.676	1411.71	567.102	505666	613.485	543.37	820.136	1505.85	4459.47
14.492_317.11218	26271.8	12411.2	5929.99	8856.56	13018.4	67794.6	6633.15	10539.7	43750.8	12454	1210.58	3147.35	68745.5	47180.6	5190.91	45032.8	4923.87	33192.1	18880.7	116.563	371.478	172.392	1355.38	7161.2	23227.9	187.682	169.126	2809.35	805.212	2742.65
11.722_218.07332	161915	161064	163506	196133	171186	101449	231676	536680	50177	412120	116035	200894	152403	281585	157043	314143	182265	387461	213642	168994	189550	178316	198625	225259	543367	224749	196497	204721	261813	213234
11.426_317.13008	2484.15	5680.74	2308.25	5321.54	868.482	11752.4	2658.96	6785.65	6779.95	6748.21	462.54	2432.07	11331.4	6457.76	547.493	3692.78	1727.54	2839.95	494.99	239.657	201.894	196.25	818.116	1671.84	18509	520.968	389.225	3047.49	1855.23	1707.1
11.715_317.13008	580.658	1261.62	1388.28	3231.35	463.141	127702	2411.43	538573	3979.55	8370.38	541.253	2530.57	66348	17907.6	380.15	979.113	1185.28	128017	483.042	146.334	182.762	153.536	745.073	782.003	209275	643.818	190.856	1834.37	2516.1	3367.8
11.849_299.1194	83.9327	156.786	160.841	103.96	77.3525	146975	352.976	323505	348.366	21292.1	91.6693	157.467	58987.9	252161	129.311	196.757	195.966	41100.7	135.354	84.4371	85.0824	109.5	123.963	126.173	44583	115.716	110.418	116.989	211.177	157.368
27.063_470.03698	82782.5	361378	277433	311341	314595	250436	251381	228420	234826	255201	289607	266739	287498	259750	252317	394082	389069	330238	381709	351982	402586	361542	421553	451706	531133	444295	423183	381292	361291	392313
14.226_345.16109	507.284	24202.7	18188.7	2891.31	403.092	71091.9	5064.8	530144	553.154	5145.92	1425.86	30925.5	13835.3	4055.07	355.413	23456.4	7456.05	112398	2947.87	129.109	122.58	175.588	2708.44	4715.44	257711	2351.48	571.503	6721.3	58884.7	9106.94
12.226_275.11954	14523.5	137008	22577.2	24912.4	1517.99	808.855	20272	985.599	67834	1153.91	2506.13	21160.8	2254.23	531.061	6002.88	203339	47892.2	804.985	7611.66	186.453	1007.68	81.3162	8976.95	5658.23	1243.42	2386.65	402.37	208433	10106.6	13022.7
12.395_275.11954	94722.5	177171	74383.9	582.414	2696.41	830.272	885.205	855.609	67834	497.85	1381.63	59470.5	1435.73	908.303	3848.18	385938	67158	1098.88	49899.5	86.0229	1372.02	259.908	50615.5	27720.7	1174.06	2553.14	768.729	208433	1146	36726.1
11.399_265.13511	602.373	15822.3	42338.7	11506.7	2999.91	525500	11392.8	48475.4	21767.9	31774.3	13963.2	84320.3	79735.5	15197.4	3782.42	144022	8390.76	200155	175769	242.237	6983.53	1268.84	5106.03	9363.97	15932.8	25539.1	880.174	1286.82	30575.1	7390.1
11.088_335.14054	28490.9	44690.8	45304.4	121402	10387.4	524392	72255.6	176559	297956	258747	61016.4	37946.2	113121	190664	58208.3	64346.3	58036.3	207497	14825	338.719	2193.8	416.686	65475.5	44590.7	140061	18269.4	15525.1	112923	92115.3	57128
12.279_333.16105	5448.24	12015.9	5484.4	7484.17	3708.25	4613.3	14017.1	4158.33	13302.9	5189.97	2457.42	43893.8	3230.89	3497.37	5411.81	13593.7	3717.26	4289.65	2829.95	140.195	1870.78	318.3	234801	16412.2	3029.93	22959.3	82914.2	8132.73	522302	130085
13.409_301.13502	45767.7	55862.7	22989.5	49288.8	41556.4	40203.5	19913.7	20141.8	79096.8	38049.3	2798.07	37239.1	116568	179408	11015.6	94191.8	21414.5	31201.6	7953.01	14652.7	497098	33379.7	2968.6	14595.3	7743.5	4145.69	107346	20536.4	2754.15	12886.5
12.097_218.07323	101507	109104	123784	193137	7048.37	13214.8	236475	445068	39358.8	266912	110516	104508	57022.8	284686	26632	237709	150004	496709	112215	87129.8	4265.57	93421.7	6706.86	110160	55904.4	93711.7	8428.52	159801	152582	128754
0.785_125.01442	26261.2	70575.8	43700.9	106250	29233.4	38479.7	33888.4	36915.5	496049	40839.9	38437	45828.8	28585.9	36416.9	20973	13331.4	14941.7	21072.7	12185.2	18150.4	25317.4	23634	60691.2	26954.1	50039.2	31880.3	35705.6	30766.8	56348.1	32709.8
11.581_287.1194	315.041	18916.7	2141.07	2324.63	390.91	45661.3	1442.42	139197	727.056	12052.3	4818.14	1759.04	93219.5	1552.2	409.438	25140.3	1783.32	78256	11794.3	153.63	169.403	183.414	29778.2	2226.72	319630	14287.8	3788.58	4500.42	36046.1	4121.83
9.95_294.10419	145050	129680	93678.7	36930.5	48728	309145	112513	205594	22586.6	216403	12540.4	66825.4	189795	482743	85402.8	450720	228855	220596	206921	5210.84	17729.5	15538.7	64016	95211.7	67182.8	33341	28428.1	87027.5	65666.1	221142
21.987_575.38669	2981.4	5732.59	6504.82	17794.9	2951.15	75381.3	7293.21	20311.9	3794.4	18790	40621.3	9648.12	5634.19	59290.6	11469.9	19856.8	7080.89	81189.6	17177	2923.64	2322.8	801.622	120729	3984.7	20036.9	14378.8	5298.41	10538.5	19131.4	4276.65
9_194.05794	3738.55	3215.23	5577.65	3993.63	6206.38	2831.6	4731.27	5707.43	41785.7	4331.43	4687.31	5487.76	5490.9	3826.6	4498.08	5514.6	5476.37	5933.34	12335.1	5996.71	5158.94	4215.14	12010.1	9631.19	10179.9	12267	6413.54	9520.53	13937.2	10320
11.625_317.13012	342.805	778.405	622.138	1295.3	251.959	19828.8	627.091	10572.4	2062.55	4072.05	238.431	893.882	5755.29	5307.85	239.064	1333.34	514.699	2822.29	145.897	145.615	128.421	113.135	796.286	465.426	475128	420.356	185.763	872.302	1067.71	660.813
9.688_254.05814	824.492	4400.39	3629.1	157718	3278.29	26208.1	38473.3	75993.1	61887.4	1017.5	203780	7700.89	4559.62	3713.19	818.135	3661.91	1040.6	661.151	420.861	151.103	279.396	176.282	106.165	1023.97	503.665	70287.2	363.514	743.513	3084.63	1806.7
11.452_273.10406	9648.04	14262.6	722.541	1238.18	153.856	32208.7	4811.49	91397.4	15414.5	9228.61	913.209	13291.9	9029.98	38752	6568.37	319698	23691	13490.1	7136.38	154.873	212.591	139.856	41918.1	11387.1	303395	15472.5	8404.8	61994	10671.2	1852.3
14.771_341.1664	24883.6	56462.5	65860.7	243282	202495	359435	105653	464288	16792.3	164744	46180.7	111733	12453	22018	541.647	80697.1	134354	201341	17471.9	204.891	2910.98	509.93	105559	36296.8	143766	81358.6	9211.81	31919.4	101364	43583.5
11.22_347.14051	22119.2	58470.2	20281.7	29619.4	6582.28	124152	43095.7	326741	14757.7	104240	12142	24089.9	63819	72652	7811.32	28401.2	35135.5	108716	6048.09	212.463	1622.59	512.142	26665.9	9693.39	188376	10242.3	8297.54	35340.9	36621.6	36938.3
13.157_200.14142	650.362	1329.36	3067.7	1172.11	998.829	6074.23	626.303	869.579	5747.69	1917.72	1000.93	2331.61	595.908	1975.67	2069.17	361.448	996.743	14845.5	7100	557.229	639.532	553.044	637.03	1120.75	477.841	864.793	1674.42	599.07	1463.36	1194.76
11.412_303.11436	35908.3	36922.3	23873.2	38383.4	4671.08	175752	16971.4	223797	57256.3	118548	15589.2	8454.99	138235	125818	20977.7	71904.2	58031.9	29686.4	2580.16	136.323	135.892	273.117	13708	12480.7	98171.8	11091.4	11645.6	32078.7	1676.82	1621.74
12.136_303.15067	134.437	68256	28071.2	215029	91.5303	58888.1	104299	95806.7	123259	352711	93.9068	30428.8	321387	134777	365.149	11817.4	122277	434580	618.802	99.937	131.965	104.837	4965.06	167.033	20664.6	340.129	164.46	211479	304402	110975
1.87_131.09442	611.319	211.571	1108.02	5537.83	385.163	2043.27	1167.17	610.33	430407	1053.19	872.683	877.92	223.212	1395.07	664.128	251.999	154.141	364.7	251.054	302.449	372.23	321.567	460.316	353.729	524.466	316.041	262.383	335.133	156.798	172.279
27.244_235.98321	266924	266282	382238	406555	283093	178131	251502	265781	257511	279647	271839	277309	251263	266283	272244	302262	319072	280920	306220	282220	297636	293456	300228	321122	292015	304761	422738	316305	304861	312315
11.169_186.12554	640.571	3378.81	1606.15	2582.24	1266.74	9014.81	359.223	832.405	432.664	3939.76	130.51	1936.13	24619	315.333	1452.39	31998.1	1606.4	1695.68	1740.46	1783.27	1971.67	9123.33	595.951	40336.7	1573.93	6957.63	1800.96	279.329	1315.6	13100.4
10.434_229.16788	13641.2	8338.38	10009.8	6968.41	8525.33	10608.7	9326.52	9153.83	412402	12136.3	5879.28	10091.3	12722.6	7835.13	10591.5	8791.35	7884.14	8224.25	17138.4	4855.55	5162.42	4688.33	8332.09	8162.32	8335	8456.12	7846.65	7143.29	5299.68	7784.84
11.558_263.11953	388.753	796.472	1738.67	648.943	133.87	411157	1978.2	4556.67	1080.4	1409.53	577.881	1074.02	216971	17444.6	513.122	3894.72	975.87	3136.82	571.464	121.221	149.873	132.289	164.821	389.414	126379	389.224	151.533	754.833	430.422	539.523
11.424_263.11961	568.884	2334.7	4236.68	2223.41	113.923	411157	8642.76	7350.55	2647.58	3654.76	1432.15	2233.05	191367	25114.2	971.033	11240.1	1039.65	9748.42	1521.73	139.222	107.617	113.858	454.676	460.692	126379	1529.48	368.676	617.469	1671.56	734.514
14.568_194.13071	2038.91	131151	1554.84	240028	54345.1	105934	104744	407503	28862.7	64168.5	300.478	59309.9	244259	174268	19326.3	195680	16421.1	20150.3	8613.01	2230.95	13486.9	3135.35	15552.8	83920	13835.3	22638.2	21901.7	16122.2	17103	142366
11.954_263.11947	38823.1	173351	92062.1	44840.6	738.353	2045.54	96739.4	986.207	122416	80210.3	21373.1	127319	898.688	926.306	26533	268722	83585.6	649.6	26199.5	112.045	890.179	161.915	2421.98	23834.7	2284.77	1720.82	888.153	84027.6	13678.6	31809.1
13.219_168.1149	16297.2	9214.88	4698.31	20076.9	9625.39	187.71	6072.07	22481	2981.06	15810.5	3158.91	20447.3	34119.1	3526.6	2495.44	30831.4	2829	5468.59	9259.13	9448.76	15319.8	12711.9	8928.82	45649.4	10754.3	11216.5	10524.3	7978.02	5846.19	72865.3
11.616_309.16133	191.451	364.196	830.206	2139.73	163.108	267692	891.562	107541	29625.4	29538.8	479.896	215.554	34111.8	4355.38	218.64	539.393	287.332	280455	200.248	184.831	184.869	160.223	840.454	238.272	20145.6	369.876	264.039	888.567	6872.68	1557.21
11.635_273.10398	10333.1	16007	14192.8	10224.3	746.591	19686.9	5021.85	94095.3	17861.1	21598.1	4198.18	8448.47	373098	75554	8809.38	319698	25403.9	62523.1	50203.5	218.96	1284.71	595.664	42550.7	12479.5	303395	15472.5	8404.8	65236.3	11054.4	12371.4
15.062_319.18193	16918	55197.2	52002.2	53840.7	12244.6	370463	31820	129514	11436.1	38768.2	33391.8	157467	54775.3	29916.4	10457.2	141925	53348.5	153299	119397	205.585	3494.88	1822.63	37179.9	16624.8	75082.4	44139.5	3186.91	12650.3	72424	27094.7
14.996_427.97561	128098	187340	76859.2	71946.7	68981	44310.9	128537	35251.7	123302	100933	87477.7	129738	140846	88269.3	124974	107029	139454	34238.3	208025	112470	127954	151878	127135	143453	369075	146100	204101	138379	139387	168498
14.322_307.18215	4798.19	18358.9	11160.1	50970.8	1855.89	240826	36255.8	368413	2557.12	11589	10911.2	25443.8	37877	11539.3	120.976	27958.5	15979	82422.3	24099.3	101.449	487.977	112.386	20046.5	2131.73	148714	6544.22	1683.73	17378.4	86552.1	13229.4
13.765_337.13826	3950.46	20917.7	57661.1	136371	5258.86	22992.8	134118	70132.5	47826.4	95924.8	23174.1	43664.1	74552.6	280167	16333.7	177901	65772.4	260170	80753.7	140.073	877.507	682.566	80911	45417.2	231924	12940.2	5258.4	41951.6	157354	4208.22
11.755_307.14566	22204.6	26297.6	6725.54	102274	4030.91	5433.27	41294.2	3241.19	20165.3	152185	10619.8	26957.2	4904.6	12252.8	21439.8	26465.7	12712.1	36586.5	1279.56	105.443	1151.32	142.293	20115.1	23924.7	21115.6	10048	5535.63	3481.17	18661	32214.8
1.024_129.04234	94359.2	132331	119124	75218	49716.5	151756	104270	77943.3	181122	82341.1	91003.1	138614	102676	203555	129281	212151	118426	242438	97951.5	133369	67100.2	247367	123848	110620	232022	108592	111556	257541	94432.2	104910
15.242_278.1885	245854	245479	215429	200836	206143	203111	241394	196353	196595	192265	191028	232579	204070	204026	241171	327843	276533	240720	317554	215399	204704	303543	217567	355791	272249	256609	301948	235765	233457	292300
13.997_375.25253	31194.5	20818.1	32609.8	15894.8	22470.5	21877.7	24160.6	16902.2	30375.3	20282.3	27057.8	21795.8	29673.2	26286.5	31671.2	249286	135763	127725	201481	147478	187534	180312	176107	248369	205686	215329	234030	300663	145362	222243
11.69_239.8992	8286.78	7835.58	601.387	10460.9	8374.76	33097.7	9992.86	14936.4	8793.95	548.737	8273.44	8624.48	2401.89	12058.7	291.367	8808.07	9575.72	12274.7	8880.56	8298.06	9749.12	285.673	10162.7	1176.88	357445	616.952	11729.9	13090.8	541.561	567.164
9.34_260.1197	29153.4	39354.6	18229.6	24027.2	5692.15	172221	29882.5	64541.2	5342.31	74667.5	2272.72	10555.7	66473.5	192672	23274.5	90400	50812.6	21408	21441.5	1741.63	3429.77	3092.7	6339.05	18271.3	2560.33	8353.29	6285.02	11848.6	11220.4	31717.5
10.171_307.14568	4224.88	39136.2	55247.4	124407	4783.5	238033	32758.1	180416	118923	52387.3	23553.3	59762.9	28428.4	12832.5	11765.2	23186.1	12310.7	38514.9	19550.6	278.761	1045.76	292.448	18750.5	6336.69	39537	15870.9	1519.77	6604.45	51507	13215.5
12.07_299.11948	137.756	59005.3	205.569	20341.4	107.773	146975	645.455	323505	27218.1	35493.7	71.1707	79.6593	162408	252161	112.3	101749	2881.78	39814.1	102.502	71.1922	67.2	74.1927	883.481	81.3449	931.465	85.1422	92.1523	34944.8	225.526	6689.8
10.138_320.17384	3042.62	6688.06	24731.9	14990.8	2602.65	17710.7	8915	10896.2	129.42	52157.5	5949.66	19559.4	30839.4	31528.5	17613	35031.8	9729.87	26284.6	1919.42	15773.9	6195.4	1030.19	3995.25	8386.83	5888.36	16048.8	1162.04	3111.93	2006.61	14990.5
13.46_337.13811	502.826	576.412	1096.99	3874.02	349.42	314241	577.416	78323.2	433.26	2872.17	960.768	1053.14	5211.33	16032.7	283.48	4591.24	917.499	37195.8	1929.11	178.263	303.74	315.612	510.741	834.874	295174	718.465	280.493	479.57	5374.32	1183.07
11.918_279.15074	121.667	1066	454.929	441.207	74.4419	312252	493.237	211511	383.87	63372.7	114.788	879.688	35432.3	35066	202.504	206.217	110.118	141992	164.164	95.8406	111.505	84.7354	235.21	398.721	2041.75	126.61	98.6561	332.466	2563.23	470.987
14.739_170.13055	16051	37924.1	16608.7	97545.9	15611.7	27213.6	22148.7	93783.9	10885.4	18657.7	7240.11	50257.1	53148.2	25705	6984.91	74867	11854	7819.63	11035.9	6894.98	5493.7	7816.43	5923.12	25625.2	8750.9	20805.9	8853.51	12338.5	6677.41	14989.7
12.639_212.14119	840.039	5196.37	1009.82	19040.9	7962.48	3879.16	7570.01	19870.8	1149.36	31781.9	1374.5	8084.68	12987.7	15177.6	677.087	27382.1	797.803	15070.1	461.496	322.665	3159.13	3743.48	10505.7	44106.6	5702.24	12108.1	4018.75	1587.81	17801	83980.6
13.395_281.06919	1982.31	130.631	2574.27	2804.41	3376.93	106.892	1630.7	1297.99	26307.9	210.154	1902.15	429.253	723.791	82.8045	359.691	76.0389	50.8797	113.464	7939.33	531.799	334.307	704.78	8936.58	191.832	1341.71	4056.7	1953.8	4865.23	512.055	2466.25
1.463_148.03693	57456.3	16555.2	14171.1	11061.2	40966.5	40288.8	24748.8	53552.3	2631.27	33305.2	78220.9	1238.15	59140.7	40030	69244.6	17003.6	31904.3	686.133	101246	62061	127291	4839.27	113361	161596	9037.16	1544	173446	14228.9	154959	101243
13.879_323.1768	5292.97	14368	14118.4	151424	4245.79	14801.9	41508.2	21562.8	36516.5	213337	12418.6	33295.6	21413.5	23181.1	6437.69	8941.6	89721.8	12045.7	1763.37	124.58	589.87	193.174	81411.8	22997.1	67594.1	19740.8	4803.24	59997.5	31069.5	64841.5
11.839_317.12998	664.725	3084.42	2171.03	5085.89	117.242	296284	3410.05	267311	2419.77	16972.3	465.506	3257.91	258120	79451.6	638.789	1066.67	855.479	40827.5	437.625	90.1217	90.8104	116.872	16808.4	1260.07	2420.89	529.049	197.837	3785.35	38735.9	2894.4
27.004_119.94948	103998	111594	107370	123213	112180	107139	106615	98118.7	70796.7	90535.7	100209	91231	93035.6	103069	102560	109030	130274	94389.3	138754	152805	174931	156796	151936	239995	292450	228331	197912	215668	174709	146118
12.544_289.13509	77750.5	201696	165705	15468.4	2202.14	4677.42	30724.9	12990	10476.1	17506.8	28593.6	40028.2	15731.2	124374	15928.4	290073	9961.74	24570.7	54065.2	77.7043	911.746	274.96	191750	20309.2	6258.62	28679.2	3079.45	7689	11436.3	10361.7
11.077_317.13002	17354.2	28369	17620.8	89331.9	3653.48	289270	38676.6	90831.8	115614	108680	14669.2	15089.2	23623.9	107489	18500.6	30330.8	36293.1	63770.7	2961.34	146.621	1416.96	187.346	15972.7	34983.7	53860.7	11594.4	1869.17	62184.7	16408.6	37154.8
11.316_361.15615	12138.2	30463.6	16703.2	22752.3	478.492	42895.5	30127.2	80664.2	15970.6	18740.7	8066.73	25714.9	25695.9	27245.5	8226.25	6218.32	1698.89	66057.5	7302.46	191.793	515.709	502.179	30863.5	4818.45	174246	447.444	376.729	24205.5	26134.3	19042.8
8.955_188.10481	40494.2	36822.7	45437.7	47159.6	40655.7	41120.7	26477.2	42778.3	285165	33997.8	48691.9	26478.4	31803	25895	31966	37577.4	29813.7	32630.2	107171	27102.6	26844.4	22798.3	32941.3	44389.7	29772.3	33638.9	27812	31800	29254.8	47035.1
4.945_148.07336	202.817	239.091	375.95	16872.5	382.862	18158	464.54	21348.2	283246	20606.6	12736.7	25760.4	21373.8	13754.8	422.636	422.93	280.87	16546	402.563	354.977	2495.28	257.981	244.366	397.166	22974.5	344.88	360.681	374.147	8603.73	263.111
11.543_317.13015	975.058	2282.4	940.205	3223.64	287.211	15851.6	1231.05	3359.52	4555.15	3042.23	223.381	1449.68	6927.84	3717.61	369.283	1887.28	731.413	5283.12	225.188	106.428	131.584	122.975	455.788	798.377	265853	396.112	184.294	1482.05	961.723	835.375
11.774_210.12563	4678.92	8419.73	789.651	21095.4	6447.24	254.281	7556.55	22093.7	903.873	17927	4805.06	8630.83	5692.25	8988.43	3706.38	23681.9	806.05	8193.26	5671.35	1337.9	1792.41	4667.2	7843.41	29329.3	2062.7	9169.18	4114.64	2812.74	19116.7	72930.4
11.916_317.13017	375.194	2588.46	9509.37	7557.68	114.029	645.024	3012.88	267311	335.412	70386.5	4980.05	5759.98	258120	191680	693.989	2136.59	2594.38	159590	387.417	50.4445	59.4592	41.5878	4643.56	1874.01	883.531	455.398	431.801	8949.08	60892	3075.48
10.41_293.12999	23866.3	27419.9	14971.8	122155	6406.13	267008	46109.2	69541.4	207568	133963	27036.8	19629.9	56006.1	124457	37697.1	27993.9	26163.6	79914	9457.29	290.637	2576	316.367	18358.5	29193.4	98674.7	13825.5	4720.3	53793.8	19123.9	26336.4
1.058_219.11072	51226.2	67606.5	28400.3	136867	50219.6	99397.1	34442	109321	16842.9	211817	127168	38877.2	40977.5	83358.9	82584.4	94547.6	145091	138962	88346.8	95180.6	69313.5	150312	97508.4	112860	72888.3	95804.4	132188	231014	108687	116459
16.295_234.16209	65405	66866	52989.3	28591.7	80628.4	55501	38416.1	116614	32797.7	62497.1	51853.9	91216.6	86039.8	29842.3	35674.7	100175	50236.4	84504.1	64822	121272	83316.2	110061	127689	149598	197100	151142	123250	145865	160913	120016
15.375_224.14132	1392.2	1902.19	1180.94	11314	2033.58	8404.02	5650.85	43376.5	424.865	5179.42	3014.84	3141.22	8249.06	5537.38	879.131	5770.35	295.66	2567.92	6799	337.022	746.885	2943.21	5992.68	9382.48	2793.43	24666.7	1805.06	635.821	7055.4	15106.4
11.137_273.10393	63883.4	28427.2	40069.9	21570.7	8327	255606	36793.3	34650.2	121831	49563.9	1884.05	46529.5	121497	174384	7676.25	50998.7	5068.2	19479.8	2774.77	249.966	1095.5	273.383	528.367	3187.67	5963.58	2234.31	310.357	8121.65	1302.85	3400.03
12.467_171.03531	225.845	383.267	237.032	345.554	61.3177	1481.03	420.856	1034.15	283.186	751.644	115.284	253.503	1089.33	607.447	134.214	694.777	273.278	1179.3	19676.2	67.2438	80.6428	79.8901	431.599	155.908	921.528	135.282	78.0766	524.626	362.21	414.243
12.643_244.16763	5048.65	4047.67	4061.41	3612.97	5336.47	3163.87	3053.14	2858.29	247237	3105.28	4636.96	4478.14	3255.96	2465.76	3943.1	3382.88	3402.91	4234.03	7104.14	5377.79	4077.43	3319.95	3426.08	3835.13	2218.11	5039.73	5923.37	6122.66	5548.94	5615.42
5.174_191.06155	34576.3	97335.1	42788.8	53434.5	10362.1	190053	63922.2	143551	57136.3	97545.6	86263.3	36184.4	120438	221523	30577.5	116285	48136.2	32437.8	34014.1	7674.16	3130.38	9991.11	16591.8	34914.8	12677.4	21060.7	16362.6	38701.2	36338.5	42496.1
8.522_208.01941	2602.7	2213.86	1740.41	1456.02	2076.74	1621.6	1836.89	1664.55	239823	1997.45	1096.12	1995.65	1443.6	1124.03	987.237	715.032	710.525	801.781	1264.47	451.057	642.626	512.45	1143.38	423.253	1141.13	389.04	563.111	507.138	501.884	469.821
27.065_552.04051	160077	211588	138684	176525	162321	129553	154773	137504	123593	139840	144331	138398	158574	122459	120649	202206	218110	171605	205317	192800	224151	196753	224784	239746	203524	234116	230973	164324	194400	203179
9.6_254.05815	578.751	1922.96	1326.26	55204.7	1850.42	14187.8	17806	49159	3896.67	708.64	143436	3877.06	2415.53	1934.59	138.44	1558.35	556.166	170.232	195.978	118.725	173.414	119.13	131.782	108.723	253.963	31458.3	135.791	260.032	205.46	836.876
11.996_239.89923	10456.6	11549.8	13095.6	11457.7	10649.4	201002	13441.8	197893	15794.9	35805.5	421.978	10927.6	14557.2	35016.2	512.216	14004.7	13037.7	191368	13174.3	11694.7	12296.1	12802.4	16258.7	13353.7	18362.8	17399.6	18460.5	18785.1	18293.6	16194.4
13_144.11481	6676.4	3433.32	2792.39	9585.92	7619.66	15205.9	3010.02	6190.48	13500.1	5697.9	2604.78	10878.7	9889.1	2902.05	3306.26	25568.1	689.079	16256.6	20681.7	31406.4	27124.8	47068.1	25590.2	49226.1	41150.1	21316.7	35282	9489.85	40452.3	10953.3
1.73_131.09442	726.839	644.057	1299.91	2764.24	856.359	1897.76	695.909	274.491	233687	446.461	313.752	1495.62	289.779	544.126	581.004	332.411	356.532	322.805	393.674	399.102	523.634	224.52	466.74	401.122	450.793	364.203	194.937	276.329	450.453	179.322
11.832_307.14568	5703.64	40407.2	93434.2	158180	1294.44	26430.3	45685.5	4940.52	20218.7	26840.9	2645.74	56852.4	8938.84	2262.9	28362.3	10802.9	1138.01	2657.2	3281.77	94.0479	1151.32	121.8	4207.03	2637.9	2522.96	694.041	472.431	5318.55	3193.73	2924.81
11.917_307.14564	4195.51	29499.7	49583.6	158180	1195.46	21036	26072.5	5778.91	14118.6	1164.82	1573.23	38905.4	87560.7	8611.77	12984.2	6821.08	1560.02	3631.6	1954.76	59.1177	279.1	64.4868	3038.65	2722.79	1022.04	3880.55	1181.73	1306.76	1621.67	1838.16
11.522_289.0988	370.693	727.217	139.285	1096.48	103.884	56460.9	336.51	178839	15251	34156.3	123.44	381.675	22347	20325	383.315	1559.6	625.84	23067.4	224.827	108.283	116.447	121.746	596.179	17279.8	229975	314.756	131.712	18357.8	24131.4	435.792
17.092_200.17785	9846.83	11936	10188.4	11179.3	7992.51	10013	10025.6	10925.7	22954.4	9728.44	13035.8	10660.8	8376.64	8807.58	6167.68	27417.9	12345.9	11406.2	21558.3	16876.3	13412.3	13978.5	15373.8	22274.2	10503.4	52018.3	18936.8	17768.6	13765.6	21195.4
11.876_287.11925	2012.33	43281.1	7472.18	19921.2	251.535	60901.5	6829.01	73592.7	4251.51	7256.46	11383.9	4563.82	230165	228267	1089.45	10347.2	5031.4	31200.6	3440.71	101.354	486.908	147.99	11320.7	3371.54	2334.37	2678.62	366.216	5917.57	31318.2	8276.61
14.513_194.1307	99040.5	193.41	39143.5	7763.34	119.525	1259.23	104744	3104.58	28943.7	517.958	25153.1	1548.37	3463.55	226.769	19341.4	1218.13	16466.1	282.365	8806.47	373.27	104.326	336.059	618.689	697.368	402.977	287.811	194.957	15654.3	119.964	5222.68
27.012_239.89909	84395.8	92335.6	88534.5	107928	90655.1	89980.9	89041	81658.1	53979.9	73925.4	81190.4	72444.4	74611.3	86827.5	84481.4	91955.6	88138.6	77223.8	145794	130473	140226	130235	127960	204005	225187	185241	167671	185387	148359	120304
11.553_303.11431	36637.3	40327.8	26404.5	38928.4	4940.67	175752	77107.9	223797	58823.4	120628	13128.8	57894	138235	93552	52920.3	73728.4	60842.9	84099.7	6485.66	134.718	668.908	273.117	17857.2	13416.5	98171.8	11683.4	12436.4	32240.4	2074.63	7109.29
10.907_216.13624	8942.18	9987.15	8604.74	13905.1	10257.7	11384.1	7360	12024.7	222308	8746.02	11318.9	7687.68	7859.65	9217.42	6986.66	11088	9217.66	13048.8	14639.5	9423.31	7743.12	6596.43	7747.46	13578.6	7285.51	13477	10795.5	13003.2	14766	15949.3
9.598_249.10365	284.087	855.015	1140.23	1521.61	631.258	18663.7	662.472	1133.5	2024.44	3737.32	452.295	1456.57	7075.71	2834.19	464.727	24387.3	631.746	4046.36	5782.77	268.061	343.421	990.438	272.24	7972.11	2017.12	4937.54	280.522	706.333	1067.03	3776.3
19.19_328.24055	15524.1	13959.6	19345.9	34186.7	8751.53	31652	24156.1	31807.4	7699.45	20791.5	33624.6	14932.2	19265	21745.3	14537.3	14352.9	12124.6	13000.1	8030.15	10914.2	10218.8	5733.67	10453.4	19821.8	7791.92	30602.4	31141.8	24867.7	20504.4	18250.2
0.841_177.10002	62342.2	56200	52613.7	200927	50432.8	38599.2	53559.2	39052.2	66139	46951.9	28235.5	66936.6	58149.3	33748.6	41537.9	23325.3	19945.5	27950.9	22851	28875.5	40396.6	26186.6	21452	48558.1	68343.3	35505	39664.8	32303.3	30576.4	39483.2
8.854_188.10486	35980.9	34679.6	31016.4	34448.5	35515	39485.8	23238.5	46739.3	217486	29520.8	51707.2	22003.5	29603.4	24389.5	28168.6	32880.9	27427.5	28562.3	92501	23534.1	25625.6	19668.5	28035.9	36404	21908.7	31822.1	26385.7	29081	25456	35561.9
1.646_181.07382	121.672	108.963	140.71	612.508	163.958	175.717	125.351	126.7	215619	188.731	263.812	165.387	116.834	104.312	123.009	117.197	125.326	120.627	133.985	121.005	109.526	116.889	127.628	121.14	141.25	127.265	126.888	128.425	284.662	124.951
15.715_186.16194	9697.69	5491.84	3616.17	14216.6	6578.2	9249.28	5151.86	16144.4	2262.32	7319.89	2761.84	14319	8465.17	3584.82	2242.75	11269.1	2246.15	3592.43	6244.95	5532.75	4213.97	12257.4	4924.87	17057.4	5134.16	49351	7244.97	6219.35	5350.64	19070.9
3.434_268.08113	2464.68	9934.66	12627.4	8779.04	3721.17	8020.56	8765.46	11180.3	211321	8952.48	11008.3	5478.95	11145.1	10405.8	13493.7	4704.51	5240.81	1468.67	1735.49	2225.78	2942.96	2926.89	1459.46	5513.58	1685.05	5259.91	2986.88	3293.3	3300.09	3495.9
12.117_317.13014	23392.2	13528.5	5878.16	34475.2	207.958	1495.48	69265.1	3257.66	36033.9	191131	1773.08	107944	1318.64	191680	983.891	126584	56351.9	797.089	3378.5	68.7473	166.391	925.563	16589.9	7777.19	1126.65	1627.96	442.769	2560.61	656.586	1813.87
14.091_291.15065	3563.93	10531.2	7728.4	11550.8	18413.6	27943.1	6178.88	51973.7	44673.5	16885	2050.41	17518.9	115135	36548.5	22968.9	36142.2	20123.8	18775.2	2526.76	128.005	1723.45	455.458	3262.42	69431.7	39847.4	2067.02	755.926	13759.7	2980.47	5329.55
11.794_230.15193	5855.49	5831.86	4242.92	5426.77	3298.41	2662.35	2827.77	2771.19	206072	3368.21	4714.29	4964.73	2593.9	3898.64	3590.42	4938.51	3938.96	6250.04	5927.35	4938.08	4003.18	3198.95	2767.74	5091.51	1464.64	7527.17	6582.27	7391.73	9502.41	9238.43
13.727_323.1768	1868.28	12202.6	8320.97	117398	145.693	16418.5	34065	4417.59	5147.21	106751	3443.93	23893.5	21005.5	19657	3522.19	7103.49	47113.8	34344.7	319.821	153.933	213.654	159.298	58650	7857.5	137808	11911.7	2196.14	21247.6	26252.5	15521.6
12.831_218.07312	14807.8	104534	62069.3	17511	29361.2	116857	56359.4	128834	70011.1	104464	26173.7	99446.4	15517.8	74824.4	14579.9	86873.5	102683	38906.3	48643.9	24078.3	33506.3	29027.4	27813.5	62339	121908	9698.66	29832.4	91276.5	27512.5	84573.7
12.569_212.14133	2731.01	1762.44	3246.19	1737.29	3276.47	190671	7570.01	3757.96	1450.08	825.741	2004.13	6729.74	11422.1	515.856	3000.29	5233.94	3318.84	1976.53	1050.09	267.923	950.067	599.192	10505.7	21267.3	75120.3	6577.02	3385.72	912.787	604.366	27687.6
9.673_286.1895	2088.8	3901.77	26554.3	6017.95	2591.91	13399.9	6319.99	4657.16	682.083	42499	2016.39	22560.4	30115.4	19159.2	5365.59	15523.6	5483.79	27537.7	893.559	6962.59	4195.65	388.799	2438.94	5712.69	5555.23	8174.51	476.692	1048.85	1116.33	6523.81
8.756_145.05254	30901.3	52218.2	17798.1	19411.7	15559.4	43575.2	36072.6	42041.5	38018.2	31230.5	17690.1	24315.2	28581.6	26915.7	10266.5	43755.6	15938.6	35048.3	31389.4	26430.8	41758.7	22114.3	54449.8	99504.3	70078.8	70392.3	53541.1	45315.4	69378	48573.9
15.557_242.18837	106.788	180.992	230.364	7762.4	434.255	1813.8	1286.22	1885.26	1795.13	4403.74	529.394	838.469	456.339	760.499	362.371	5481	3356.19	6018.25	1834.34	162.951	401.939	872.997	2303.59	5409.5	1772.18	35270.2	187.544	332.094	5383.14	17044.8
0.739_218.0733	6527.66	8356.37	11101.6	8669.07	43784.3	9813.39	6417.45	73171.3	182214	5594.42	3710.95	7583.02	9050.92	5938.72	4124.13	6148.96	65116.9	61932	4898.66	50314.4	53535	62417.4	61953	10434.8	13513.6	6198.55	63098.9	4392.97	9668.77	56887
18.585_302.22486	20803.9	37346.9	49170.4	60923.9	31311.3	36754.5	53499	49640.7	15662.4	32999.2	85188.5	28272.8	43340.9	47066	41055.7	33294.6	55378.6	29697	25505	26465.5	36634.4	31159.8	36685.8	44249.5	29974.1	68763.9	32896.6	78616.4	35263.9	52891.2
14.493_345.16121	25597.1	14822.9	10087.3	24046.8	4384.29	83478.3	20874.7	23383	1995.95	8040.71	16730	9019.4	14990.7	92879.9	34160	15685.7	28411.1	83612.7	28664.6	87.9347	1468.81	1146.62	48393.7	7432.35	159142	6753.68	20646	47852.3	70774.8	33231.8
5.495_182.05783	53016.3	17694.7	27353.5	88782.6	77782.6	44159	26677	41140.4	22643	62382.8	69436.9	6668.08	52728.1	33380.7	53502.5	48959.2	50116.2	5938.75	52271.1	27702.5	102098	10720.2	46494.5	174441	10311	20391.3	53055	23337	101713	75390.8
12.483_218.0731	8138.26	113457	74149.4	169740	25451.8	13934	116455	165457	102372	160205	32435.9	23596	11363.1	92556.8	4799.94	148545	80746.3	142884	44452.2	32670.2	4940.94	33780.2	126242	68463.6	139196	51598	33788.1	132028	10496.8	122275
0.83_153.05554	68.4448	53.2519	48.5261	2677.44	106.565	32.6832	106.145	28.2765	167698	32.5159	34.9679	136.116	104.731	45.7374	36.5714	44.6951	38.9566	40.2357	29.989	69.0128	57.3813	56.6902	33.0967	35.6206	110.607	30.8722	63.8818	40.7589	40.3419	56.1358
12.508_331.14528	256.387	58343.3	261.417	929.269	451.675	2387.66	784.163	2739.22	597.472	917.591	32408.7	85083.2	943.002	712.549	12681.5	8798.54	335.54	1684.08	1146.31	76.2037	162.816	65.3663	66469.5	20839.9	995.907	3732.84	6273.69	543.492	96158.5	75695.3
9.046_175.06323	564.37	1511.45	622.733	1132.85	414.348	1200.33	1030.19	714.064	977.368	1110.86	781.028	574.959	797.455	685.245	420.491	1128.04	2575.4	1671.07	737.494	895.442	3381.01	1626.27	3779.84	10000.1	2815.05	3813.06	6966.47	1721.02	1370.29	2415.27
14.425_194.13072	224.756	25914.1	762.774	26501.4	5984.72	22269.9	9967.39	86045.9	2819.95	11365	78.4508	18813	18465.4	9738.26	257.25	17745	2091.38	9621.91	374.988	1454.16	1920.36	1679.89	1492.82	13040.9	2995.22	11133.1	1486.26	3620.93	1673.63	17433.1
12.289_299.11942	3116.25	137380	35324.9	36995	869.994	1084.17	12919	885.379	40068.2	960.342	2894.49	3513.24	956.692	392.276	476.572	163109	31022	677.204	786.094	76.714	61.1462	64.8778	405.609	9775.76	1140.87	80.2808	54.1913	51884.6	2833.18	1427.59
11.586_330.24089	9475.02	14237	11511.6	24992.1	10279.3	13531.2	26263.7	19837.3	8572.6	9586.03	35351.3	9645.13	8615.14	10743.8	6944.54	3133.34	2764.23	2565.78	4002.04	2335.1	3247.45	2762.02	2314.81	6121.74	1917.44	9427.51	3934.03	5273.49	4361.52	4154.24
16.16_186.16197	1849.67	1585.5	1462.68	2236.82	1541.46	1395.72	1602.08	2734.16	3132.63	1308.8	1052.1	2921.63	1888.26	1268.76	873.783	4449.59	1296.2	1109.54	3958.28	2582.82	2096.59	3028.88	2163.15	3823.98	1421.62	11344.3	2790.03	2876.42	2198.76	3014.85
13.97_170.13052	930.44	1817.5	1486.81	5312.92	1459.54	7169.24	1175.37	4983.4	624.294	2229.24	491.461	5106.37	3981.15	954.904	381.159	7911.19	845.42	1596.21	923.973	2251.03	1534.56	8670.3	1949.16	13268.1	1762.02	6540.85	1969.82	2105.32	1673.1	5985.96
15.597_196.1466	6321.89	9620.44	8072.05	36210.5	6146.21	17853.7	14086.8	72230.6	1779.86	6862.02	2536.48	19886.8	19489.3	11825.8	1421.87	32936.8	2339.35	2782.55	7363.23	514.783	2488.91	2139.08	1942.3	12610	1878.31	12039.7	2093.26	1313.72	2271.74	25574.5
12.316_351.17167	2913.78	6290.8	5142.07	37603.1	128.731	1497.67	8397.7	1390.14	19277.1	2296.48	924.229	5832.67	1462.99	1178.37	547.563	6287.05	1166.38	1158.73	4949.36	119.737	99.56	99.9725	157153	2403.25	1780.7	325.058	112.303	6759.73	54977.2	7776.51
27.01_159.93248	47615.6	60707.1	55106.7	57603.1	69721.3	47395.8	59391.9	55297.5	46964.4	50532.7	56719.1	49343.7	50723.6	45772.5	54903.7	58142.9	70810.1	62721.5	73557.9	69176.8	87941.7	116002	82812.1	76038.2	154343	122930	91780.6	111879	75567.8	76830.7
12.701_224.03571	13455.9	4258.79	6101.83	4539.46	7939.9	5236.82	7361.26	6703.06	8668.33	4868.84	5586.39	7903.2	3820.77	4910.63	7580.68	11813.2	8892.41	6047.81	9961.34	8941.37	9567.5	9474.77	137551	84509.1	83081	107575	49975.8	66534.6	85624.7	72500.3
14.105_158.13049	38516.9	17788.5	16120.8	19341.4	20675	16968.6	18873.7	22474.5	41526.7	16401.8	11627.7	36066.3	25473.6	12631.5	12200.2	55802.9	20585	30379.8	64125.7	73052.3	64874	74553.9	74297	110316	67671.6	55632.1	70886	48824.6	70994.1	46830.5
5.208_311.12324	1594.48	2005.17	669.184	2435.61	2091.47	367.445	1262.14	1186.41	768.473	1259.03	1068.3	1365.94	555.139	748.906	1337.43	1605.15	1132.54	275.368	1311.89	1119.53	1680.99	1550.4	959.903	2962.88	1137.05	1020.11	725.314	4837.64	646.029	1672.14
12.182_287.11926	3928.86	80024.7	11992.4	33778	239.626	1330.76	7355.22	1325.43	34023.9	29330.1	2560.61	23775.7	970.443	1358.04	1533.19	138409	36090.1	856.669	12433	94.6374	187.211	95.2647	728.908	9335.45	1444.56	900.332	102.929	46223.4	662.434	5128.08
12.699_240.06712	14086.1	4420.07	6187.66	4761.14	7619.13	5058.02	7774.98	5430.1	7948.57	4509.78	6499.66	8384.05	4763.07	4619.51	8929.12	13222.6	9347.94	6488.88	11598.7	8613.15	10784.4	11278.3	134798	96257.5	92289.3	117486	55945.2	57173.6	84454.3	89676.5
12.213_279.15083	2975.46	12069.2	15767.8	38755	60.9251	42744.9	9000.19	4980.48	15950.1	62984.5	256.388	18513.3	36225.4	728.633	103.617	8178.57	13022.3	1690.78	682.567	68.0188	66.7084	56.6509	6814.26	198.222	9924.26	137.853	46.46	15796.5	14364.7	19031
27.057_634.04359	74445.5	104864	63332.7	83964.2	79393	60452.6	85313.2	60747.8	56941.3	61346.3	75711.7	61590.7	76140.3	62452.6	56548.8	93014.4	102644	75650.1	95052.3	79448.7	107770	89981.7	104776	107329	136871	107665	97227.6	90452.2	84967.1	87592.7
9.959_202.12059	10909.3	9881.88	8787.6	11553.5	8764.88	10458.9	5668.97	10264.5	136248	10680.9	11068.3	8595.51	8570.19	6441.63	6988.35	9244.19	8356.23	12281.9	18587.2	7142.08	6961.56	3799.54	7155.39	8581.46	7839.29	9012.05	7979.49	10536.5	12722.7	14631.9
16.155_296.23549	9524.35	13538.3	13488	9745.27	7585.37	30345.8	25763.6	25714.2	1244.16	12029	30960.3	8996.78	9976.5	15030	5495.95	3301.88	1257.11	1329.46	1893.11	1404.65	1530.27	1221.23	1475.62	4549.52	1936.2	6196.83	3676.06	4947.36	2490.36	3064.87
5.325_219.11073	25565.9	41690	14214.7	69416.8	24749.7	47041	15701.1	47792.7	5987.18	103256	64109.1	14621.2	15836.7	41967.2	39972.8	30909.5	51097.5	56482.6	39007.7	52039.4	50417.6	65631.4	54502.2	92201.1	26114.4	45235.3	71222.8	117549	46498.7	74821.4
8.144_246.10063	4419.77	12330.5	7713.11	8750.64	7297.15	15282.6	5351.81	7503.88	4209.38	14417.4	2518.17	14898	7314.39	5330.43	2461.8	3336.41	3919.55	3469.63	2248.09	4728.13	21820.1	3001.78	4566.95	18463.5	3140.02	5436.41	6711.98	3097.47	5962.08	11553.8
0.689_306.03065	8077.3	25563.4	21061.5	36830.1	14352	19947.6	15951.8	14394	129159	18599.8	21327.8	9241.46	12378	19444.5	15632.4	21338.1	21877.5	35512.8	14326.6	12123.1	14631.2	14970	29640.7	24008.9	38833.4	26229.2	22380.9	14685.6	26667.2	20039.1
13.464_296.16007	46704.9	59690.9	34035.9	58571.3	59710.7	57132.1	67636.9	58571	25465.4	85738.5	1769.05	53840.4	70296.8	87230.9	32497.4	86333.2	50964.6	90010	40417.7	3442.05	52161.2	54361.1	62725.9	102636	74097.5	123864	41034.8	31775.1	65869.4	104241
8.866_208.01941	1040.04	478.931	844.655	757.024	918.203	438.919	611.791	244.211	128493	490.895	491.558	552.935	345.021	200.775	349.417	476.529	138.987	161.223	440.292	451.057	344.033	210.661	367.541	361.141	167.344	171.289	601.915	243.854	367.389	216.595
19.545_280.24051	14873.4	23714.3	24054.6	37700.2	11136.1	32034.4	25264.1	32466	10765.1	22085.1	41715.1	16783.7	16776	23140	15510.5	22337.4	15831.1	12928.7	10289.1	11376	16706.5	8256.19	11811.9	26604.8	8817.57	41686.7	24405.2	26582.5	25686.6	25694.5
16.554_248.17787	2678.03	383.203	314.1	3621.21	2440.5	3265.36	430.98	2671.91	461.91	156.003	7609.58	462.73	462.377	2383.72	2482.53	416.022	3720.02	8816.07	7546.4	11773.2	10975.3	35058	23883.7	26919.7	30662.2	2336.31	16636.6	110.486	38286.5	200.633
7.577_166.06283	6670.22	5669.09	12479.2	40135.8	5926.82	15802.9	13948.3	13845.9	10627.7	13557.3	6348.96	5535.58	8315.3	8978.56	15246.3	10664.2	35825.6	6649	11332.5	5493.01	45945.9	4426.6	30673.3	82078.8	5104.14	18768.9	26751.4	5926.04	29360.5	34499.2
14.179_240.17258	382.625	752.651	172.605	2786.75	1593.45	3481.83	945.089	2491.92	241.58	3899.81	80.2334	809.015	1306.3	813.675	75.5206	11364.7	690.839	813.261	4354.29	95.1611	230.081	4932.29	1927.94	6342.27	1106.21	24253.4	391.452	169.707	2049.72	12774.5
18.678_278.22484	2478.77	5445.6	5121.6	12105.3	1718.82	9913.4	8607.99	12018.7	2561.49	4237.35	16271.2	2882.6	4628.97	5937.74	2111.87	4057.76	2246.35	1174.64	1302.62	1577.48	1803.48	880.075	1132.72	3595.14	997.388	10040.4	3585.83	4858.58	4113.29	3056.34
16.71_298.25105	732.643	1142	472.558	1291.97	446.662	1616.85	795.003	921.335	129.046	409.082	1149.93	432.544	141.147	686.317	442.848	311.707	251.273	347.479	205.072	216.745	167.032	240.696	136.637	578.324	175.952	335.002	204.088	325.407	135.643	181.114
7.237_278.16334	2505.6	1315.25	4766.84	1428.05	986.41	31976.5	1284.89	17617.6	10338.9	12637.8	3746.09	1156.17	17654.4	17306.7	538.005	2540.71	3115.13	15993.4	998.106	1217.59	1357.03	1632.08	694.481	638.204	1220.59	1495.98	1892.75	1657.66	5513.44	1250.03
0.824_180.06329	33313	60064.1	43026.3	37235.4	33038.8	78646.7	56742.8	77989.1	12364	63026.8	53005	25890.6	51102.9	83733.4	81400.8	21661	20825.2	18419	8902.4	12219.9	13556.7	16082.6	73921.3	35185.7	27710.9	30632.6	31110.4	40767.2	87944	30902.4
12.346_212.1413	341.901	442.468	11350	827.375	568.76	964.228	430.14	14175.9	430.22	949.45	346.117	510.002	13764.6	1829.3	433.016	865.902	625.601	772.739	112058	300.814	291.217	454.213	311.144	1332.32	574.212	629.098	348.66	1378.22	3387.44	1134.81
14.177_194.13069	923.836	2550.32	19740.3	3779.47	3871.01	4805.55	497.221	23003.5	744.002	2223.37	151.448	5722.23	3507.7	1179.47	145.663	10976.5	195.441	750.771	282.751	188.822	320.654	1190.83	500.436	2687.17	384.003	3283.52	530.798	465.148	832.428	3817.09
15.179_242.18837	130.544	189.196	84.2352	590.191	186.483	144.042	42.4397	294.013	255.951	839.937	82.2345	126.228	68.1698	156.662	103.987	12065.7	289.873	156.983	2817.53	327.085	186.453	3041.65	699.125	4574.8	250.759	62362.5	183.531	54.4703	6612.54	5278.12
11.603_351.17152	132.431	188.667	170.171	1878.41	105.448	1615.2	649.818	3391.7	2129.29	1444.52	102.083	175.969	342.472	188.31	151.238	163.669	154.443	930.6	133.386	127.852	127.878	104.357	3418.62	123.717	101737	126.824	365.145	158	10185.4	691.605
16.609_224.17758	488.578	505.313	401.983	1008.54	861.409	1017.42	353.427	934.873	331.982	1005.17	341.51	385.769	771.76	1046.88	164.087	3634.82	344.15	260.742	1843.27	155.131	122.467	874.626	390.099	1431.08	225.251	30356.3	222.355	108.538	1397.13	2508.55
8.745_304.14592	12060.5	25580.2	20982	7118.75	9401.57	17430.3	14354	14237.5	1563.31	17708.4	29182.3	24966.6	28852.9	21892.8	11849.4	102402	29098.9	6087.31	41440	30492.7	17663.7	34770.5	23700	76057.7	1570.51	50946.1	45467.5	31298.1	28066.4	49372.6
17.942_276.20921	354.832	1172.47	1535.62	4513.46	278.137	1726.96	1898.09	3241.54	703.22	450.237	6908.94	651.795	504.74	980.948	262.974	331.813	235.657	129.967	125.498	157.06	124.41	96.3903	104.913	478.413	56.1947	3478.73	392.003	497.088	403.047	344.797
14.652_601.33912	3356.11	1505.53	1225.36	2566.28	4023.43	1825.8	1431.06	1948.95	811.185	1590.89	3405.94	1703.76	2850.82	1326.69	1879.9	7283.89	5021.03	1542.64	6434	4911.16	6627.93	5495.47	4751.57	11391.3	1898.54	5344.8	7375.34	4868.71	4540.93	9222.7
21.498_384.19725	15680.3	13877.6	13245.5	17717.7	11195.9	13551.1	17683.3	17395.3	25508.5	20353.4	20064.4	7788.3	10306.7	12459.4	13136.3	11408.2	12356.4	7824.33	6353.74	6334.11	7093.38	8298.47	12667.5	13012.2	5969.64	11121.8	13818.4	12891.2	12095.1	11502.1
9.544_215.15224	5921.66	3332.77	7284.96	2350.83	3628.39	3421.73	4233.6	2446.49	98496	3968.62	2336.81	5428.84	5166.34	4695.74	3976.02	3280.14	2469.21	2927.16	10610.7	2284.75	1991.17	1433.24	2759.05	3678.95	3088.49	2845.5	2100.92	4057.32	2307.06	2559.83
0.679_157.99797	73948.6	44770	42398.2	78624	34636.5	85695	62120.1	89285.8	38507.9	54105.1	24242	72808.6	89441.7	57033.5	28697.8	30122.5	25354.1	44534.5	9707.74	6751.24	17703.6	5450.13	15659.2	21426.8	97543.8	17532.7	10276.5	30753.7	28679.4	25183.6
11.32_186.12555	1916.51	3100.48	365.71	4608.54	611.042	16445.9	932.08	5520.14	2379.13	8373.91	1334.96	1253.32	5478.69	3727.49	1590.12	7872.04	1491.28	4700.49	2735.27	1371.61	1722.49	2048.21	804.012	7950.11	1724.18	1261.77	225.052	1872.72	1987.53	10071
1.013_134.02131	10222.4	7918.62	4719.06	6115.06	9844.99	15216.7	4906.62	14998.5	331.004	11184.2	14472.1	1709.52	6504.69	6628.17	11989.9	18634.7	30715.5	2482.8	13787.6	17498.8	15050.5	12666.2	47270	43609.5	41920	4325.67	50207.2	21358.2	84503.3	80911.2
14.279_252.134	9150.51	5668.65	4870.51	10273.2	6006.82	10704.2	4165.01	5852.79	2079.98	8864.25	2818.99	11629.5	10822.7	2901.55	2406.07	16379.2	3237.89	3609.58	12327.9	10932.4	9677.4	19119	7976.59	30724.2	5676.3	15852.3	10225.9	8316.33	6938.66	28975.3
11.147_212.14126	5898.49	3685.57	4134.56	17772.1	17904	21000.9	3983.07	29817.3	146.221	26968.9	689.8	20506.2	33260.9	1960.29	143.241	4316.6	114.442	6908.12	4734.97	420.976	1511.8	3618.2	3637.8	8567.24	8525.08	7993.92	1129.86	205.217	1379.31	92651.4
11.615_279.15056	126.012	89.2163	107.406	113.554	100.336	1346.56	228.214	8905.54	383.87	147.28	97.1349	141.876	326.476	179.182	143.907	117.279	120.677	400.217	163.176	121.655	106.941	94.5195	113.269	117.721	24363.2	136.728	119.583	150.342	199.129	125.543
12.295_270.14476	2208.71	3442.53	2861.68	3357.95	15140.2	4621.93	1235.84	1431.63	705.72	7944.09	1684.2	17028.8	9518.5	924.136	2944.78	26573.4	1005.24	2000.61	35604.7	970.433	3974.29	24895.9	3217.89	42856.1	1795.8	30970.7	2920.65	727.179	2173.07	23928.9
27.003_261.88118	35670.4	34317.4	29900.3	25824.2	35392.2	24664.1	26552.9	28772	23864.3	20654.8	28069.4	22763.4	21136.2	21549.5	23228.7	28046.7	26993.6	21173.4	43982.1	38242.9	53414.6	48025.6	37204.1	42441.1	87166.8	57215.3	58008.9	37911.2	41876.5	38427.1
13.473_258.18333	2272.61	1897.79	1165.41	1488.75	739.884	1010.78	860.804	441.806	86326	862.955	1314.69	1948.37	1320.98	731.317	1374.49	962.73	1199.36	2668.88	2311.43	1954.29	1506.48	1460.17	1106.84	1635.84	739.571	1584.15	2121.86	3912.07	4280.97	1366.36
14.655_242.18834	130.931	1099.41	190.805	3795.65	1307.33	674.639	813.067	2836.73	1282.94	1606.68	216.354	999.532	819.103	1248.15	77.7214	4224.21	294.316	772.088	241.499	209.596	166.713	1146.87	1814.66	3225.6	653.222	28058.5	299.715	238.639	2328.19	5124.28
13.626_477.31752	37.8563	28.0263	27.6694	194.75	27.7615	64.1207	33.8111	798.553	27.9796	657.654	28.9325	32.9061	30.266	30.4047	40.163	72.0363	41.5391	151.335	25.5781	30.084	23.3698	32.2834	35.1847	3213.57	44.6932	290.068	28.134	31.461	54.859	15745.2
17.609_436.28297	14371.3	31737.5	38156.8	43611.2	20236.3	27163.6	52375.4	20397.2	8140.4	49616.1	74829.7	14228.6	18165	53825.1	45207	18927.7	24413.3	13999.3	6719.77	3128.39	5624.95	11581.9	7736.18	19002.4	10397.4	9415.95	8322.43	12374	17721.6	22413.8
14.595_218.07327	4060.97	13449.6	7876.3	13676.1	8711.31	10844.4	8346.2	5138.53	5331.22	13992.1	6849.46	8261.13	4944.9	3680.13	6799.1	7108.19	12681	31678.7	3433.78	7734.92	5948.81	2212.78	23375.8	15260.8	21582.6	21443.4	10390	16690	8324.06	6912.95
19.39_304.24051	18946.6	26294.8	30944.5	30909.3	15289.3	19204.5	27732.7	23008.1	9354.36	17780.2	48076	18287.6	24475.4	21572	24610.4	32731.3	48988.6	25205.8	21213.5	29417.3	25185.9	21748.4	29234	44405.5	24650.1	40736	27726.6	62047.1	30162	39185.2
10.986_186.12555	736.989	1506.58	969.589	4947.55	876.899	3858.77	753.473	8216.74	3597.73	2270.39	566.821	1894.62	5299.25	1037.36	1911.95	8914.34	1846.76	1730.54	4246.03	1814.16	214.638	2144.55	393.236	4986.56	1445.15	1303.48	1353.64	536.262	1994.36	4237.75
1.042_258.03541	33829.5	35494	42927.8	26208.2	41782.9	26896	4604.75	4093.73	337.771	10273.2	12079.9	18965.5	11344.1	2036.45	8600.73	21736.7	23200.3	17290.9	13271.9	11818.3	12973.4	14711.2	6933.9	4375.67	25382.1	34684.4	15937.3	13966.3	21423.8	30597.3
13.423_294.18349	32103.7	32835.8	23253	23486.7	20597.5	19509.8	26094	25585.6	34588.5	27804	24763.8	33730.8	27776.2	28770.4	35402.4	34527.3	25107.3	39301.7	37164.9	40433	27844.9	42685.8	34537.8	53970.3	114.915	47356.1	42373.2	29794.7	55543.2	26574.2
1.007_334.1017	19131.8	11612.8	22090.3	29124.8	10081	24474.6	52848.7	37830	39071	19715.6	11762.3	53993.7	28845.5	28588.3	69088.4	4579.19	5686.6	5486.19	871.462	1755.14	2336	2194.15	1811.85	3523.18	8897.37	9323.43	1358.83	2123.13	1312.08	1450.98
20.499_282.25621	6735.32	6002.11	8067.92	8637.8	7089.12	8118.64	7720.4	9076.77	5837.07	7477.55	16481.6	5152.1	5689.67	9286.67	7720.14	6398.41	5743.97	5840.32	3705.57	4501.87	5517.58	4592.71	4286.67	7458.54	3759.27	13854.1	13701.5	7158.98	7627.9	6934.67
15.569_220.14648	409.469	1285.98	661.418	17652	9282.73	3063.07	2789.31	18380.4	403.05	1335.25	408.738	1990.82	748.193	684.398	78.9141	3051.22	424.379	1072.58	382.446	59.5095	788.234	199.931	395.563	3138.81	235.577	4153.86	392.083	194.995	451.655	5109.32
12.359_198.12559	4912.1	9078.76	301.991	4438.61	4033.81	3580.8	3702.34	2709.93	3327.69	4864	5824.31	8640.65	2824.6	9020.6	2330.2	6609.82	3145.41	2803.87	8382.04	5670.94	4529.88	4514.86	3334.22	6124.26	2761.51	13405.6	4558.94	4319.16	4247.79	5455.28
0.83_182.07892	15305.2	16369.7	18613.3	8113.19	20721.2	16539.5	20029	19031.1	1157.35	17539.5	18580.3	10320.1	15541.6	15132.2	17255	37031.4	19442.1	23932.4	23767.2	27661.3	22434.6	20785.2	23640.1	33584.8	24221.9	19132.5	18074.4	19289.7	19565.1	27519.1
13.241_294.18333	32228.3	240.382	23251.7	23486.7	20638.4	171.074	26188.6	112.707	34644.3	27981.4	24763.8	34082.1	29277.5	28771.1	35406.7	34604.1	25214.4	151.062	37187.9	33555.5	28443.5	42732.3	99.6606	53970.3	336.537	47356.1	42373.2	29796.1	55543.2	26574.2
13.38_202.15687	92.575	1114.39	1030.95	11628	1280.96	261.832	2327.84	5427.9	4428.81	7342.03	569.349	1834.98	3180.02	1080.75	495.317	7247.42	2259.64	2623.53	2321.75	191.438	303.774	1144.8	1404.56	4442.59	111.858	8251.32	985.552	1040.39	2403.95	15526.4
0.852_254.10049	16105.2	6286.21	5751.83	5941.05	29094.7	17117.9	8538.74	11813.1	1813.81	8959.47	13220.8	15944.7	11287.6	16438.8	14109.6	10705.3	36632.3	15337.9	7954.88	19230.5	20951.3	15664	3037.41	17073.6	24102.6	45665	8566.8	16161.6	19149.3	12157.1
13.49_218.07332	7382.03	8669.64	5776.73	8938.81	11133.7	20476.5	5447.59	19425.5	14611.3	10318.9	5516.93	8116.81	13978.1	11948.2	10015.1	15218.7	4361.02	14832.9	6892.58	7442.1	6919.77	12917.4	14826.2	5056.96	15239.9	18964.6	13110.2	12212.4	18135.8	16979.4
