# Supplementary material for: Multi-omics analysis to examine microbiota, host gene expression and metabolites in the intestine of black tiger shrimp (Penaeus monodon) with different growth performance
Source: PeerJ. 2020 Aug 14;8:e9646. doi: 10.7717/peerj.9646 (PMC7430268; doi:10.7717/peerj.9646)
Supplement: Supplemental Information 8 — Sequences were clustered into operational taxonomic units (OTUs) at 97% similarity. Two alpha diversity indices including Shannon and Chao1 in each sample are shown. [file peerj-08-9646-s008.xlsx]

## Sheet: summary
Table S3. Sampling depth analysis of 16S amplicon sequences obtained from shrimp intestines in Top-weight group (T, n=15) and Bottom-weight group (B, n=15). Sequences were clustered into operational taxonomic units (OTUs) at 97% similarity. Two alpha diversity indices including Shannon and Chao1 in each sample are shown.
Samples		Raw sequences	Filtered sequences	Number of						Alpha diversity
				Phylum	Class	Order	Family	Genus	OTUs	Shannon	Chao1
Top-weight group	1	155351	121550	10	15	25	33	50	191	2.49646	261.833
	2	172850	144735	9	17	33	58	96	276	2.70027	296.667
	3	181209	152437	7	14	27	42	61	219	1.38659	256.417
	4	157077	134505	8	13	22	34	45	168	1.43068	201.3
	5	163637	135890	9	21	39	67	105	330	2.35212	366.886
	6	160988	135023	8	17	34	45	68	236	1.66471	304.077
	7	166079	146647	8	17	31	48	74	246	1.46361	281.429
	8	160293	139335	10	21	47	67	100	271	0.734359	307.676
	9	147271	119370	10	18	37	48	75	278	2.67165	354.957
	10	194022	165593	8	12	29	46	59	203	1.31502	234.25
	11	193038	164795	9	16	33	54	88	264	2.658	305.045
	12	201756	165238	10	21	38	56	88	313	2.56654	351.079
	13	185564	151256	9	18	33	50	69	264	2.06133	317
	14	162843	133777	10	19	29	39	56	222	1.78565	259
	15	183308	142764	9	21	39	65	98	317	2.44671	375.036
	Average	172352	143528	8.93333	17.3333	33.0667	50.1333	75.4667	253.2	1.98225	298.177
	Standard deviation	16403.6	14522.7	0.96115	2.96808	6.36359	11.0121	19.3718	47.335	0.625757	50.3782
Bottom-weight group	1	167250	145311	9	15	31	52	89	236	2.58132	271.435
	2	165659	137312	9	13	22	30	45	199	2.36565	244
	3	173132	140063	10	16	28	48	80	267	2.85676	318.333
	4	157645	133464	9	18	36	51	76	251	1.34359	370.895
	5	166013	135511	10	14	26	38	65	250	2.97052	322.067
	6	142132	117952	9	18	42	69	114	314	2.67404	384.333
	7	156446	129974	10	21	43	69	116	354	2.64153	376.146
	8	159561	135463	8	17	33	49	86	260	1.57486	285.385
	9	160406	134885	8	19	37	58	94	283	2.40648	324.25
	10	157427	137822	6	11	20	29	40	160	1.29774	205.556
	11	118749	98465	8	20	38	67	113	309	1.98307	353.406
	12	162174	132752	9	16	32	46	86	292	2.1576	368.241
	13	152443	126426	10	20	37	59	103	296	2.64987	337.364
	14	168310	123503	10	21	49	79	140	344	3.09029	351.156
	15	163457	143824	10	21	36	49	79	254	2.4373	272.571
	Average	158054	131515	9	17.3333	34	52.8667	88.4	271.267	2.33537	319.009
	Standard deviation	13161.8	11665.7	1.13389	3.13202	7.86493	14.357	26.763	51.2117	0.562124	52.9738
