# Supplementary material for: Multi-omics analysis to examine microbiota, host gene expression and metabolites in the intestine of black tiger shrimp (Penaeus monodon) with different growth performance
Source: PeerJ. 2020 Aug 14;8:e9646. doi: 10.7717/peerj.9646 (PMC7430268; doi:10.7717/peerj.9646)
Supplement: Supplemental Information 9 [file peerj-08-9646-s009.xlsx]

## Sheet: Sheet1
Table S4. Number of non-redundant transcripts i.e. unigenes that can be annotated using different databases
Database	Number of hits (%)
Non-redundant protein (NR)	32,928 (43.8%)
KEGG mapping	14,706 (19.6%)
SwissProt	18,690 (24.9%)
PFAM	14,746 (19.6%)
GO	21,548 (28.7%)
eggNOG	19,576 (26.0%)
Number of unigenes that can be annoated at least one database	35,199 (46.8%)
