# Supplementary material for: Multi-omics analysis to examine microbiota, host gene expression and metabolites in the intestine of black tiger shrimp (Penaeus monodon) with different growth performance
Source: PeerJ. 2020 Aug 14;8:e9646. doi: 10.7717/peerj.9646 (PMC7430268; doi:10.7717/peerj.9646)
Supplement: Supplemental Information 10 — The genes that were enrich by using KOBAS were denote by ‘*’ in front of UnigeneID. [file peerj-08-9646-s010.xlsx]

## Sheet: Up-regulated
Supplementary Table 7. 176 Up-regulated genes in the Top-weight. The genes that were enrich by using KOBAS were denote by ‘*’ in front of UnigeneID.
UnigeneID	Sequence length	Log2 foldchange	Adjusted p-value	Accession ID	Description	DEGs
TRINITY_DN73989_c2_g1_i1	1011	8.51881	0.00902901	ESU47826.1	Hypothetical Protein P376_4196	Up-regulated gene
*Trinity_DN38520_c0_g1_i2	1607	7.68141	0.0487122	XP_004519100.1	Patatin-Like Phospholipase Domain-Containing Protein 3	Up-regulated gene
TRINITY_DN47732_c4_g1_i5	1174	7.49798	8.13692e-14		_	Up-regulated gene
TRINITY_DN41987_c0_g1_i1	1591	7.3573	0.0162035	XP_012261621.1	Mucin-5Ac-Like	Up-regulated gene
TRINITY_DN34430_c0_g1_i1	1374	6.21692	0.00352555	XP_005147017.1	Histidine-Rich Glycoprotein	Up-regulated gene
TRINITY_DN50712_c0_g4_i2	804	6.01927	0.000139894		_	Up-regulated gene
TRINITY_DN53870_c2_g2_i4	757	5.64212	8.93326e-05		_	Up-regulated gene
TRINITY_DN79148_c0_g1_i1	293	5.40219	4.82474e-05		_	Up-regulated gene
TRINITY_DN34119_c0_g1_i1	208	5.28658	0.0224588		_	Up-regulated gene
TRINITY_DN35615_c0_g1_i3	1066	4.99772	0.00769491	XP_001951627.2	Uncharacterized Protein Loc100166829	Up-regulated gene
TRINITY_DN55601_c2_g1_i1	267	4.99106	0.0132421		_	Up-regulated gene
TRINITY_DN50252_c0_g1_i1	424	4.94516	1.38789e-06		_	Up-regulated gene
*Trinity_DN36612_c0_g1_i1	456	4.73872	0.00769491	AGV07535.1	Heat Shock Protein 70 Form 2, Partial	Up-regulated gene
TRINITY_DN53995_c0_g1_i2	1061	4.51735	0.0214258		_	Up-regulated gene
TRINITY_DN48547_c1_g1_i1	357	4.19562	0.0225403	AFA43700.1	X-Box Binding Protein 1	Up-regulated gene
TRINITY_DN42029_c0_g1_i1	1273	4.1714	0.000750147		_	Up-regulated gene
*Trinity_DN53866_c2_g1_i1	366	4.15854	0.000101932	XP_027214936.1	Cytochrome P450 3A13-Like	Up-regulated gene
TRINITY_DN52665_c4_g2_i1	1278	4.15619	0.0273699	ACN38704.1	Heat Shock Protein 70	Up-regulated gene
TRINITY_DN42994_c1_g1_i1	748	4.11225	0.0288146		_	Up-regulated gene
TRINITY_DN39023_c0_g1_i1	2906	3.99887	0.0440234	AIN44010.1	Hemolin-Like Protein	Up-regulated gene
TRINITY_DN53713_c2_g1_i1	412	3.9733	0.045543		_	Up-regulated gene
TRINITY_DN44171_c0_g1_i4	1986	3.92186	0.0234039	EGD17169.1	Hypothetical Protein Xga_4248	Up-regulated gene
TRINITY_DN28791_c0_g1_i1	380	3.87248	0.0214258		_	Up-regulated gene
TRINITY_DN28295_c0_g1_i2	5422	3.82275	0.0011529	XP_001945726.2	Hormone Receptor 4 Isoform X1	Up-regulated gene
*Trinity_DN30310_c0_g1_i1	275	3.80662	0.00423779	XP_013380527.1	60S Ribosomal Protein L15-Like	Up-regulated gene
*Trinity_DN54093_c0_g1_i4	384	3.72964	0.0487122	XP_008217767.1	Asparagine--Trna Ligase, Cytoplasmic	Up-regulated gene
TRINITY_DN48710_c4_g1_i1	1286	3.59665	0.00216599	ACN40429.1	Unknown	Up-regulated gene
TRINITY_DN12145_c0_g1_i1	683	3.58378	0.00071789		_	Up-regulated gene
TRINITY_DN53155_c2_g1_i1	908	3.57327	0.000642268	XP_642871.1	Hypothetical Protein Ddb_G0276785	Up-regulated gene
TRINITY_DN33265_c0_g1_i1	336	3.5235	0.0274174		_	Up-regulated gene
TRINITY_DN42546_c3_g2_i2	1670	3.49284	0.000101932	XP_013774725.1	Hsp70-Binding Protein 1-Like Isoform X1	Up-regulated gene
TRINITY_DN56810_c2_g1_i1	325	3.32342	2.82621e-05		_	Up-regulated gene
*Trinity_DN55188_c1_g2_i1	450	3.27216	0.00308036	AKB96227.1	Heat Shock Protein	Up-regulated gene
TRINITY_DN29487_c0_g1_i1	2141	3.18992	0.00319066	EFX83073.1	Hypothetical Protein Dappudraft_101007	Up-regulated gene
TRINITY_DN11051_c0_g1_i1	269	3.16356	0.0203867		_	Up-regulated gene
TRINITY_DN37157_c0_g1_i1	533	3.06942	0.0162035		_	Up-regulated gene
TRINITY_DN42813_c0_g1_i1	1112	3.03151	0.00440002		_	Up-regulated gene
TRINITY_DN40449_c1_g2_i1	1656	2.98137	0.0226952	ABW87872.1	Serine Protease	Up-regulated gene
TRINITY_DN8729_c0_g1_i1	247	2.95319	0.0106929		_	Up-regulated gene
TRINITY_DN2608_c0_g1_i1	355	2.906	0.0345368	P21997.1	Ssgp_Volca Recname: Full=Sulfated Surface Glycoprotein 185; Short=Ssg 185; Flags: Precursor	Up-regulated gene
TRINITY_DN52196_c0_g2_i6	657	2.89969	0.0158899		_	Up-regulated gene
TRINITY_DN2020_c0_g1_i1	262	2.88213	0.0331519	EPF41504.1	Transcriptional Regulator, Partial	Up-regulated gene
TRINITY_DN43093_c0_g1_i2	3572	2.87578	0.040783	CEL65391.1	Tpa: Mucin Family Glycoprotein	Up-regulated gene
TRINITY_DN34768_c0_g1_i1	305	2.86666	0.0269981	ABW87872.1	Serine Protease	Up-regulated gene
*Trinity_DN50261_c1_g1_i4	1878	2.84239	0.00320876	AGV07535.1	Heat Shock Protein 70 Form 2, Partial	Up-regulated gene
*Trinity_DN50400_c0_g1_i2	2557	2.82138	0.0273699	XP_001809957.2	Sortilin-Related Receptor	Up-regulated gene
TRINITY_DN43964_c0_g1_i1	265	2.78121	0.00641572	AGI99530.1	Mitochondrial Manganese Superoxide Dismutase	Up-regulated gene
TRINITY_DN21449_c0_g1_i1	319	2.76632	0.0315949		_	Up-regulated gene
TRINITY_DN46689_c0_g1_i1	2215	2.76166	0.0109019	KDR13799.1	Dnaj Protein-Like Protein 1	Up-regulated gene
TRINITY_DN37401_c0_g1_i1	1231	2.70016	0.0382388	KMW68940.1	Hypothetical Protein Bddg_13146	Up-regulated gene
TRINITY_DN41882_c0_g1_i2	1224	2.69524	0.0128528	XP_003885261.1	Collagen Alpha-1(Iii) Chain (Precursor), Related	Up-regulated gene
TRINITY_DN52946_c1_g1_i1	863	2.6751	0.00540898	KOB65432.1	Cyp6U1	Up-regulated gene
TRINITY_DN47538_c0_g1_i1	3687	2.6699	0.045935	XP_968019.1	Cell Wall Protein Dan4 Isoform X2	Up-regulated gene
TRINITY_DN49034_c0_g1_i2	1947	2.63348	0.0352712	AFA42361.1	Clip Domain Serine Proteinase 3	Up-regulated gene
*Trinity_DN46739_c0_g2_i1	3810	2.54902	8.07521e-06	EFX79494.1	Putative Positive Regulatory Domain/B-Lymphocyte Induced Maturation Protein 1, Version A	Up-regulated gene
TRINITY_DN37937_c1_g1_i1	251	2.54147	0.0248692		_	Up-regulated gene
TRINITY_DN83664_c0_g1_i1	279	2.53814	0.00663078	XP_013772648.1	Glycine Receptor Subunit Alpha-2-Like	Up-regulated gene
*Trinity_DN51570_c3_g2_i1	1970	2.52941	0.00398376	NP_001137200.1	Cytochrome P450 Monooxygenase	Up-regulated gene
TRINITY_DN37938_c0_g1_i1	1380	2.52863	0.000101932	KOF68482.1	Hypothetical Protein Ocbim_22007232Mg	Up-regulated gene
TRINITY_DN50062_c3_g1_i1	2653	2.51995	0.0141291	XP_002424189.1	Predicted Protein	Up-regulated gene
TRINITY_DN39439_c0_g1_i1	783	2.48896	0.0302061	EFX73018.1	Hypothetical Protein Dappudraft_110228	Up-regulated gene
TRINITY_DN50022_c2_g3_i1	1555	2.47844	0.0441666	XP_001605896.2	Solute Carrier Organic Anion Transporter Family Member 5A1	Up-regulated gene
TRINITY_DN53693_c3_g3_i1	966	2.46092	0.0258488		_	Up-regulated gene
TRINITY_DN40417_c0_g1_i1	1075	2.4485	0.0397879	WP_051551163.1	Hypothetical Protein	Up-regulated gene
TRINITY_DN42164_c0_g1_i1	2506	2.44742	0.0130008	KDR17787.1	A Disintegrin And Metalloproteinase With Thrombospondin Motifs 18	Up-regulated gene
TRINITY_DN78480_c0_g1_i1	348	2.44077	0.0315949	EPF42751.1	Sn-Glycerol-3-Phosphate Transporter, Partial	Up-regulated gene
TRINITY_DN44109_c0_g1_i1	1411	2.41448	0.0168158		_	Up-regulated gene
TRINITY_DN52865_c0_g1_i1	216	2.39381	0.00188431		_	Up-regulated gene
TRINITY_DN88449_c0_g1_i1	262	2.3864	0.0258488		_	Up-regulated gene
TRINITY_DN28800_c0_g1_i1	791	2.36805	0.0443494		_	Up-regulated gene
TRINITY_DN37813_c0_g1_i4	1162	2.30727	0.00921719	CDQ98495.1	Unnamed Protein Product, Partial	Up-regulated gene
TRINITY_DN56876_c4_g1_i1	290	2.29478	0.000209306	KRM61856.1	Hypothetical Protein Fc26_Gl001300	Up-regulated gene
TRINITY_DN39096_c0_g1_i1	416	2.28077	0.0122612		_	Up-regulated gene
TRINITY_DN43121_c0_g1_i1	1383	2.2473	0.0117299		_	Up-regulated gene
*Trinity_DN44526_c0_g2_i1	2713	2.2419	0.0273841	ABCG5	Atp-Binding Cassette Sub-Family G Member 5	Up-regulated gene
TRINITY_DN45869_c4_g1_i1	1680	2.2313	0.0322301	XP_010336509.1	Low Quality Protein: Basic Proline-Rich Protein-Like, Partial	Up-regulated gene
TRINITY_DN33883_c0_g1_i1	2059	2.21845	0.0113886	XP_014231767.1	Atp-Dependent Helicase Brm-Like	Up-regulated gene
TRINITY_DN52967_c0_g1_i1	363	2.21398	0.00663078		_	Up-regulated gene
TRINITY_DN20064_c0_g1_i1	242	2.13514	0.000525808	CEP24827.1	Putative Cell Agglutination Protein C1289.15 Flags: Precursor, Partial	Up-regulated gene
*Trinity_DN81078_c0_g1_i1	261	2.12314	0.0487122	KFR13461.1	Glycogen Debranching Enzyme	Up-regulated gene
TRINITY_DN55494_c2_g1_i6	329	2.11196	0.00646628	XP_003282867.1	Hypothetical Protein Dicpudraft_146480	Up-regulated gene
TRINITY_DN43098_c5_g1_i8	1594	2.10039	0.00141701	CAB62280.1	Hydroxyproline-Rich Glycoprotein Dz-Hrgp	Up-regulated gene
TRINITY_DN19180_c0_g1_i1	719	2.08858	0.0103155		_	Up-regulated gene
*Trinity_DN46709_c0_g1_i5	855	2.08685	0.0203867	CAL68989.1	Heat Shock Protein 70 Kda	Up-regulated gene
TRINITY_DN53664_c0_g2_i1	560	2.07826	0.0382388		_	Up-regulated gene
TRINITY_DN50758_c0_g2_i5	4336	2.04673	0.00654135	EFX69031.1	Hypothetical Protein Dappudraft_259237	Up-regulated gene
TRINITY_DN56835_c0_g1_i9	334	2.04547	0.00466781	EGT54950.1	Hypothetical Protein Caebren_32639	Up-regulated gene
TRINITY_DN6928_c0_g1_i1	349	2.04448	0.000723308		_	Up-regulated gene
TRINITY_DN39127_c0_g1_i2	434	2.04427	0.000856715		_	Up-regulated gene
TRINITY_DN52491_c0_g1_i1	2824	2.0306	0.00817465	XP_013185473.1	Toll-Like Receptor 6	Up-regulated gene
TRINITY_DN40933_c0_g1_i1	1214	2.01896	0.033546		_	Up-regulated gene
TRINITY_DN55501_c0_g1_i1	417	2.01161	0.0382582	KRM61856.1	Hypothetical Protein Fc26_Gl001300	Up-regulated gene
TRINITY_DN56542_c0_g1_i1	357	1.99515	0.00578688	KRM61856.1	Hypothetical Protein Fc26_Gl001300	Up-regulated gene
TRINITY_DN40051_c0_g1_i2	460	1.97333	0.0413566		_	Up-regulated gene
TRINITY_DN52652_c1_g2_i1	4034	1.97082	0.0168158	XP_004921552.1	Probable G-Protein Coupled Receptor Mth-Like 1	Up-regulated gene
TRINITY_DN44976_c2_g1_i2	1185	1.97036	0.000770472	XP_001608209.2	Aminopeptidase N-Like	Up-regulated gene
TRINITY_DN54349_c0_g2_i1	1645	1.93636	0.0122612		_	Up-regulated gene
*Trinity_DN19634_c0_g1_i1	423	1.92721	0.0382388	CAB85964.1	Phosphoenolpyruvate Carboxykinase	Up-regulated gene
TRINITY_DN56056_c2_g1_i3	302	1.88519	0.0306605	KRM61856.1	Hypothetical Protein Fc26_Gl001300	Up-regulated gene
TRINITY_DN55752_c0_g1_i2	399	1.86356	0.0169892	EGT54950.1	Hypothetical Protein Caebren_32639	Up-regulated gene
TRINITY_DN56230_c2_g1_i2	332	1.86153	0.0112415	EGT54950.1	Hypothetical Protein Caebren_32639	Up-regulated gene
TRINITY_DN44454_c0_g1_i3	1755	1.85682	0.0443494	EFA02811.1	Eyegone	Up-regulated gene
TRINITY_DN48878_c0_g1_i1	2556	1.77532	0.0487122	XP_008330704.1	Coiled-Coil Domain-Containing Protein 147	Up-regulated gene
TRINITY_DN53240_c7_g1_i1	1857	1.76177	0.000365503	XP_013416627.1	Krueppel-Like Factor 9	Up-regulated gene
TRINITY_DN44937_c0_g1_i2	1333	1.75377	0.0112415	XP_003150565.1	Hypothetical Protein Loag_15025	Up-regulated gene
TRINITY_DN51689_c2_g1_i1	3705	1.74669	0.0343344	KFQ37761.1	Hypothetical Protein N332_09774, Partial	Up-regulated gene
TRINITY_DN50343_c0_g1_i3	3776	1.73965	0.0365488	EZA51692.1	Acetylcholine Receptor Subunit Alpha-Like Protein	Up-regulated gene
TRINITY_DN56311_c2_g1_i5	295	1.72211	0.0451307	EGT54950.1	Hypothetical Protein Caebren_32639	Up-regulated gene
TRINITY_DN51447_c1_g1_i17	1653	1.70682	0.013831	XP_013786777.1	F-Box Protein At1G78280-Like	Up-regulated gene
TRINITY_DN56516_c1_g1_i1	230	1.7043	0.0315729	XP_003282867.1	Hypothetical Protein Dicpudraft_146480	Up-regulated gene
TRINITY_DN56768_c0_g1_i1	1511	1.70248	0.0174665	XP_002976387.1	Hypothetical Protein Selmodraft_416325	Up-regulated gene
TRINITY_DN50102_c3_g1_i4	1376	1.70122	0.000247944	EHH17232.1	Hypothetical Protein Egk_13580, Partial	Up-regulated gene
TRINITY_DN56209_c0_g1_i9	461	1.68256	0.0273699	EGT54950.1	Hypothetical Protein Caebren_32639	Up-regulated gene
*Trinity_DN49765_c0_g1_i1	3649	1.65556	0.00266708	XP_011313787.1	Alpha-Aminoadipic Semialdehyde Synthase	Up-regulated gene
TRINITY_DN56538_c0_g1_i2	343	1.65166	0.0481809	CEP24827.1	Putative Cell Agglutination Protein C1289.15 Flags: Precursor, Partial	Up-regulated gene
TRINITY_DN44876_c0_g1_i1	3063	1.63313	0.0278922	XP_013406000.1	Transient Receptor Potential Cation Channel Subfamily A Member 1 Homolog Isoform X1	Up-regulated gene
TRINITY_DN50425_c0_g1_i4	2471	1.6099	0.0331519	XP_012809043.1	Neuroblast Differentiation-Associated Protein Ahnak	Up-regulated gene
TRINITY_DN49701_c7_g1_i2	5373	1.60205	0.00598479	KFM69036.1	Hypothetical Protein X975_06281, Partial	Up-regulated gene
TRINITY_DN52659_c0_g1_i1	8931	1.5785	0.0117389	XP_006623889.1	Uncharacterized Protein Loc102677948, Partial	Up-regulated gene
TRINITY_DN22018_c0_g1_i1	244	1.5734	0.0273699		_	Up-regulated gene
*Trinity_DN50138_c0_g1_i1	3522	1.56118	0.0254646	XP_002404032.1	6-Phosphofructo-2-Kinase/Fructose 2,6-Bisphosphatase	Up-regulated gene
TRINITY_DN41523_c0_g1_i2	3135	1.54109	0.0440234	EFX90292.1	Hypothetical Protein Dappudraft_309832	Up-regulated gene
TRINITY_DN54937_c4_g2_i1	793	1.5266	0.0462893	Q9U572.1	Clot_Penmo Recname: Full=Hemolymph Clottable Protein; Flags: Precursor	Up-regulated gene
TRINITY_DN42398_c0_g2_i1	1590	1.5235	0.0179054		_	Up-regulated gene
TRINITY_DN46306_c0_g1_i1	2709	1.51406	0.00477864		_	Up-regulated gene
TRINITY_DN25018_c0_g1_i1	918	1.50011	0.0141291	KDR11189.1	E3 Ubiquitin-Protein Ligase March8	Up-regulated gene
TRINITY_DN51547_c0_g1_i12	2523	1.49924	0.0315949	XP_013384971.1	Collagen Alpha-1(Iv) Chain-Like	Up-regulated gene
TRINITY_DN44831_c0_g1_i1	578	1.49147	0.000770472		_	Up-regulated gene
TRINITY_DN55671_c3_g1_i1	617	1.49039	0.0171679		_	Up-regulated gene
TRINITY_DN53196_c0_g1_i5	4823	1.48778	0.0118232	EFX67223.1	Hypothetical Protein Dappudraft_331275	Up-regulated gene
TRINITY_DN28065_c0_g1_i1	251	1.48657	0.0466871		_	Up-regulated gene
TRINITY_DN55391_c6_g1_i1	877	1.48543	0.00559065	XP_012288919.1	Aminopeptidase N	Up-regulated gene
TRINITY_DN35902_c0_g1_i1	227	1.47393	0.0169376	CAB85964.1	Phosphoenolpyruvate Carboxykinase	Up-regulated gene
TRINITY_DN52059_c2_g1_i3	1045	1.46783	0.0172137	XP_004031989.1	Hypothetical Protein Img5_133010	Up-regulated gene
TRINITY_DN43840_c3_g1_i1	1775	1.44591	0.00235349	KFM81017.1	Microtubule-Associated Proteins 1A/1B Light Chain 3C, Partial	Up-regulated gene
*Trinity_DN54440_c1_g1_i3	6781	1.43453	0.0464828	KOC65261.1	Plexin-B	Up-regulated gene
TRINITY_DN46775_c2_g1_i3	2235	1.42575	0.0413566	EFX82963.1	Hypothetical Protein Dappudraft_302120	Up-regulated gene
TRINITY_DN35748_c0_g1_i2	460	1.40862	0.0361192		_	Up-regulated gene
TRINITY_DN52529_c3_g1_i1	495	1.4078	0.0154058		_	Up-regulated gene
TRINITY_DN51513_c0_g1_i1	2808	1.40309	0.0402626	XP_013190773.1	Protein Extra-Macrochaetae	Up-regulated gene
TRINITY_DN45529_c3_g4_i1	3022	1.3838	0.00763127	XP_013785716.1	Thiosulfate Sulfurtransferase/Rhodanese-Like Domain-Containing Protein 3	Up-regulated gene
TRINITY_DN47170_c0_g1_i2	1567	1.36773	0.0433901	ERE69653.1	Transcription Initiation Factor Tfiid Subunit 3	Up-regulated gene
TRINITY_DN54784_c5_g2_i1	4410	1.3665	0.00114284	KPJ04206.1	Putative E3 Ubiquitin-Protein Ligase Ie1	Up-regulated gene
TRINITY_DN36484_c0_g1_i1	430	1.36352	0.000480213	KDR17869.1	Catenin Delta-2	Up-regulated gene
TRINITY_DN53558_c2_g5_i2	2509	1.35424	0.0382388	CDQ77565.1	Unnamed Protein Product	Up-regulated gene
TRINITY_DN53943_c1_g1_i1	3241	1.34701	0.00232709		_	Up-regulated gene
TRINITY_DN45997_c1_g2_i1	2504	1.34223	0.0463519	XP_014480586.1	Protein Split Ends-Like	Up-regulated gene
TRINITY_DN47578_c7_g2_i1	3730	1.34043	0.0443494		_	Up-regulated gene
TRINITY_DN51723_c3_g3_i1	1111	1.33549	0.00437355		_	Up-regulated gene
TRINITY_DN50077_c4_g3_i1	1268	1.33238	0.00862005		_	Up-regulated gene
TRINITY_DN52549_c7_g2_i5	454	1.32957	0.010564	KOF69527.1	Hypothetical Protein Ocbim_22004669Mg	Up-regulated gene
TRINITY_DN53258_c1_g1_i1	2965	1.32276	0.0445997		_	Up-regulated gene
*Trinity_DN14121_c0_g1_i1	258	1.31669	0.0374462	XP_013779485.1	Myosin Heavy Chain, Non-Muscle-Like	Up-regulated gene
TRINITY_DN40818_c0_g1_i1	908	1.31661	0.0382388		_	Up-regulated gene
TRINITY_DN52176_c0_g1_i1	4274	1.31327	0.0454469		_	Up-regulated gene
TRINITY_DN39469_c0_g1_i1	499	1.30429	0.0273699	XP_008478290.1	Eukaryotic Translation Initiation Factor 4 Gamma 2	Up-regulated gene
TRINITY_DN49678_c2_g1_i3	4613	1.30115	0.0315949	XP_002428969.1	Hypothetical Protein Phum_Phum412540	Up-regulated gene
*Trinity_DN50849_c0_g3_i4	3348	1.28932	0.040783	KOC60786.1	Myc Proto-Oncogene Protein	Up-regulated gene
TRINITY_DN48492_c1_g1_i3	5287	1.27817	0.00234568	XP_013384700.1	Ferm Domain-Containing Protein 4A-Like Isoform X6	Up-regulated gene
TRINITY_DN42291_c1_g5_i1	650	1.27497	0.0440874		_	Up-regulated gene
TRINITY_DN45339_c0_g1_i1	900	1.27164	0.0364295	CDQ98416.1	Unnamed Protein Product, Partial	Up-regulated gene
TRINITY_DN47350_c0_g1_i1	3760	1.25587	0.0400822	XP_011774504.1	Hypothetical Protein, Unlikely	Up-regulated gene
TRINITY_DN55239_c1_g1_i1	567	1.21736	0.0228342		_	Up-regulated gene
TRINITY_DN51226_c0_g2_i1	5162	1.20441	0.0176897	KDR17240.1	Gram Domain-Containing Protein 1B	Up-regulated gene
TRINITY_DN47060_c6_g1_i9	8295	1.19695	0.0448601	XP_014279236.1	Tyrosine-Protein Phosphatase Lar Isoform X4	Up-regulated gene
TRINITY_DN47360_c1_g1_i1	1025	1.17878	0.0387854	CDQ69651.1	Unnamed Protein Product	Up-regulated gene
TRINITY_DN54301_c1_g3_i3	2709	1.17341	0.00831493	XP_005079933.1	R3H Domain-Containing Protein 1 Isoform X1	Up-regulated gene
TRINITY_DN41157_c0_g1_i1	3831	1.15016	0.0464828	XP_002954239.1	Hypothetical Protein Volcadraft_102187	Up-regulated gene
TRINITY_DN48378_c6_g1_i2	2032	1.13941	0.0306605	XP_010752116.1	Low Quality Protein: Zinc Finger Ccch Domain-Containing Protein 13	Up-regulated gene
*Trinity_DN50572_c0_g1_i1	2500	1.13787	0.0327895	XP_013398292.1	Phosphatidylinositol 3,4,5-Trisphosphate 3-Phosphatase Tpte2-Like Isoform X1	Up-regulated gene
TRINITY_DN54536_c1_g1_i2	575	1.13431	0.0258488		_	Up-regulated gene
TRINITY_DN50140_c3_g1_i5	4260	1.11851	0.0440366	XP_014260770.1	Solute Carrier Organic Anion Transporter Family Member 3A1-Like	Up-regulated gene
*Trinity_DN43796_c2_g1_i5	4699	1.11837	0.0382388	AKA62189.1	Nf-Kb Transcription Factor Relish	Up-regulated gene
TRINITY_DN54151_c2_g1_i10	1856	1.10003	0.0382582	CDJ83342.1	Similar To Piggybac-Derived 2 (Agap012114-Pa)	Up-regulated gene
*Trinity_DN45830_c2_g1_i2	1834	1.09017	0.0338207	AGZ84433.1	Camp-Responsive Element Binding Protein, Partial	Up-regulated gene
TRINITY_DN31119_c0_g1_i1	415	1.08638	0.0226952		_	Up-regulated gene

## Sheet: Down-regulated
Supplementary Table 7. 268 Down-regulated genes in the Top-weight group. The genes that were enrich by using KOBAS were denote by ‘*’ in front of UnigeneID.
UnigeneID	Sequence length	Log2 foldchange	Adjusted p-value	Accession ID	Description	DEGs
TRINITY_DN40143_c0_g1_i1	690	-1.01018	0.0361809	XP_002014760.1	Gl18776	Down-regulated gene
*Trinity_DN55201_c1_g1_i1	426	-1.04014	0.0487122	KDN35057.1	Hypothetical Protein Rsag8_11895, Partial	Down-regulated gene
TRINITY_DN23682_c0_g1_i1	376	-1.04945	0.0466871	AFY10818.1	Mitochondrial Cytochrome C Oxidase Subunit Iv	Down-regulated gene
*Trinity_DN29052_c0_g1_i1	221	-1.05115	0.0440874	ABW23194.1	Ribosomal Protein Rpl39	Down-regulated gene
TRINITY_DN38474_c0_g1_i1	1112	-1.06041	0.0443494	AEI88083.1	Peroxisomal Delta3 Delta2-Enoyl-Coenzyme-Like Protein	Down-regulated gene
TRINITY_DN13770_c0_g1_i1	223	-1.06705	0.00764686		_	Down-regulated gene
TRINITY_DN32741_c0_g1_i1	747	-1.08615	0.0161471	XP_014676379.1	Predicted: 28S Ribosomal Protein S23, Mitochondrial-Like Isoform X1	Down-regulated gene
TRINITY_DN8280_c0_g1_i1	202	-1.09158	0.0382582		_	Down-regulated gene
TRINITY_DN55804_c1_g1_i1	426	-1.10085	0.0387854	XP_011419976.1	Predicted: 26S Proteasome Complex Subunit Dss1-Like	Down-regulated gene
*Trinity_DN50622_c4_g2_i2	1196	-1.11444	0.0130008	EFX80638.1	Hypothetical Protein Dappudraft_318250	Down-regulated gene
*Trinity_DN30626_c0_g1_i1	239	-1.13252	0.0454469	AIU99750.1	Mitochondrial Cytochrome C Oxidase Subunit Vic	Down-regulated gene
*Trinity_DN56008_c0_g1_i1	491	-1.14455	0.0390244	XP_003142272.1	Hypothetical Protein Loag_06688	Down-regulated gene
TRINITY_DN55293_c0_g2_i3	399	-1.15216	0.0331519	XP_014095225.1	Predicted: Uncharacterized Protein Loc106621058	Down-regulated gene
TRINITY_DN39065_c0_g1_i1	356	-1.17664	0.0136774		_	Down-regulated gene
TRINITY_DN11239_c0_g1_i1	253	-1.20314	0.0225403	EMC82806.1	Dna Topoisomerase 1	Down-regulated gene
*Trinity_DN40961_c1_g1_i1	872	-1.21694	0.0122612	AEB54627.1	Trap	Down-regulated gene
TRINITY_DN75304_c0_g1_i1	345	-1.23488	0.0331519		_	Down-regulated gene
TRINITY_DN88168_c0_g1_i1	490	-1.24561	0.0317583		_	Down-regulated gene
TRINITY_DN37944_c4_g2_i1	621	-1.24632	0.0461521		_	Down-regulated gene
*Trinity_DN56167_c0_g1_i1	477	-1.26686	0.0335047	ADK60919.1	Ubiquitin-Conjugating Enzyme E2	Down-regulated gene
TRINITY_DN40861_c0_g2_i2	1376	-1.27067	0.00185957	XP_013385782.1	Predicted: Dehydrogenase/Reductase Sdr Family Member 11-Like Isoform X2	Down-regulated gene
*Trinity_DN56263_c0_g1_i2	344	-1.28685	0.0434453	ACR54103.1	Atp Synthase Subunit G	Down-regulated gene
TRINITY_DN40385_c0_g2_i1	941	-1.29363	0.0478536	XP_001655229.1	Aael002418-Pa	Down-regulated gene
*Trinity_DN54885_c1_g2_i1	794	-1.30634	0.0274343	AEP84099.1	Acyl-Coa-Binding Protein	Down-regulated gene
TRINITY_DN52126_c3_g2_i1	590	-1.33092	0.0203867	AKR04375.1	Histone H1	Down-regulated gene
*Trinity_DN36315_c0_g1_i1	230	-1.34343	0.038618	AAL49373.2	Rh59211P	Down-regulated gene
TRINITY_DN42725_c0_g2_i1	547	-1.35376	0.0244505		_	Down-regulated gene
TRINITY_DN35025_c1_g1_i3	376	-1.36248	0.00115323	ENN72863.1	Hypothetical Protein Yqe_10512, Partial	Down-regulated gene
TRINITY_DN24556_c0_g1_i1	256	-1.38688	0.00437355	AEB54627.1	Trap	Down-regulated gene
TRINITY_DN68305_c0_g1_i1	330	-1.40114	0.000831029		_	Down-regulated gene
TRINITY_DN3822_c0_g1_i1	209	-1.41496	0.0346898		_	Down-regulated gene
*Trinity_DN54492_c0_g1_i2	1449	-1.42556	0.0463209	ENN79154.1	Hypothetical Protein Yqe_04340, Partial	Down-regulated gene
TRINITY_DN25448_c0_g1_i1	279	-1.43973	0.0224588	AEB54627.1	Trap	Down-regulated gene
TRINITY_DN55886_c2_g1_i1	501	-1.45857	0.0100939	XP_002739473.1	Predicted: Failed Axon Connections Homolog	Down-regulated gene
TRINITY_DN54599_c1_g1_i6	277	-1.46622	0.00624987	WP_047493546.1	Histone	Down-regulated gene
*Trinity_DN29000_c0_g1_i1	207	-1.48867	0.0258488	XP_011554368.1	Predicted: Cytochrome B-C1 Complex Subunit 8	Down-regulated gene
*Trinity_DN33105_c0_g1_i1	293	-1.51405	0.0485224	XP_004530208.1	Predicted: Atp Synthase-Coupling Factor 6, Mitochondrial	Down-regulated gene
TRINITY_DN37036_c0_g1_i2	348	-1.51936	0.0494721		_	Down-regulated gene
*Trinity_DN40798_c0_g1_i1	552	-1.52974	0.0241407	ACU82846.1	Acyl-Coa-Binding Protein	Down-regulated gene
TRINITY_DN42628_c0_g1_i1	1718	-1.55445	0.0258488	EFX79132.1	Hypothetical Protein Dappudraft_225197	Down-regulated gene
TRINITY_DN50717_c2_g1_i1	1161	-1.56101	0.00862459		_	Down-regulated gene
TRINITY_DN42375_c3_g1_i1	1025	-1.58734	0.0196276	EFX86930.1	Gst-N-Metaxin-Like Protein	Down-regulated gene
*Trinity_DN55227_c1_g1_i1	359	-1.59115	0.0203867	XP_014085676.1	Predicted: Nadh Dehydrogenase	Down-regulated gene
TRINITY_DN54346_c0_g1_i1	473	-1.62488	0.012308	ACR78715.1	Polyprotein Pp3, Partial	Down-regulated gene
TRINITY_DN28929_c0_g1_i1	258	-1.62635	0.00235601		_	Down-regulated gene
TRINITY_DN61005_c0_g1_i1	250	-1.63027	0.0198171		_	Down-regulated gene
TRINITY_DN54710_c1_g1_i1	327	-1.64231	0.0323694		_	Down-regulated gene
TRINITY_DN56599_c0_g2_i1	889	-1.6494	0.0093498		_	Down-regulated gene
TRINITY_DN39934_c0_g1_i1	413	-1.65046	0.0397879	AAP13578.1	Lysozyme	Down-regulated gene
*Trinity_DN5741_c4_g1_i1	753	-1.65725	0.0262887	AAN16375.1	Lysozyme	Down-regulated gene
TRINITY_DN54668_c0_g1_i10	760	-1.66178	0.0152554	CEH44534.1	Hypothetical Protein Xac3610_10050001	Down-regulated gene
TRINITY_DN10396_c0_g1_i1	336	-1.6731	0.0344133		_	Down-regulated gene
*Trinity_DN50056_c2_g3_i1	4001	-1.67722	0.0334802	XP_013387692.1	Predicted: Methionine Synthase-Like	Down-regulated gene
TRINITY_DN33333_c0_g1_i1	327	-1.70878	0.0303509		_	Down-regulated gene
TRINITY_DN42221_c0_g2_i1	454	-1.71386	0.0142902	WP_045060218.1	Hypothetical Protein	Down-regulated gene
TRINITY_DN10938_c0_g1_i1	273	-1.72611	0.0139182	WP_015477851.1	Outer Membrane Autotransporter	Down-regulated gene
TRINITY_DN54521_c1_g1_i2	337	-1.7484	0.00567846		_	Down-regulated gene
TRINITY_DN56101_c0_g1_i2	299	-1.78235	0.0285173		_	Down-regulated gene
TRINITY_DN58270_c0_g1_i1	370	-1.79258	0.0440234		_	Down-regulated gene
TRINITY_DN34073_c1_g1_i1	552	-1.7933	0.0200324		_	Down-regulated gene
TRINITY_DN24413_c1_g1_i1	275	-1.79888	0.0338207		_	Down-regulated gene
TRINITY_DN32691_c1_g1_i1	827	-1.80866	0.0382388		_	Down-regulated gene
TRINITY_DN20887_c0_g1_i1	341	-1.82672	0.00655597		_	Down-regulated gene
*Trinity_DN37479_c0_g1_i1	686	-1.84327	0.0374462	ABA54612.1	C-Type Lectin 1	Down-regulated gene
TRINITY_DN38998_c0_g1_i1	1179	-1.86232	0.0451307	XP_001748625.1	Hypothetical Protein	Down-regulated gene
*Trinity_DN55724_c0_g1_i1	420	-1.86294	0.0131924	AAP13577.2	Lysozyme	Down-regulated gene
TRINITY_DN25299_c0_g1_i1	289	-1.89567	0.0413566	ADV04044.1	Atp-Binding Cassette Transmembrane Transporter	Down-regulated gene
TRINITY_DN32867_c0_g1_i1	379	-1.89783	0.00488706		_	Down-regulated gene
TRINITY_DN55805_c3_g1_i1	453	-1.90106	0.0496907		_	Down-regulated gene
TRINITY_DN35533_c0_g1_i1	249	-1.91219	0.00714202	AAP13578.1	Lysozyme	Down-regulated gene
TRINITY_DN37763_c0_g1_i1	1011	-1.98318	0.047989		_	Down-regulated gene
TRINITY_DN36997_c0_g1_i1	215	-1.98829	0.0262887		_	Down-regulated gene
TRINITY_DN55125_c5_g1_i3	350	-1.9924	0.0451787		_	Down-regulated gene
TRINITY_DN51771_c0_g1_i1	844	-1.99759	0.0128485		_	Down-regulated gene
TRINITY_DN39833_c0_g1_i2	275	-2.00662	0.0286113		_	Down-regulated gene
*Trinity_DN55955_c0_g1_i1	446	-2.02458	0.00987682	AAN16375.1	Lysozyme	Down-regulated gene
TRINITY_DN28958_c0_g1_i1	261	-2.0419	0.00369457	AAP13577.2	Lysozyme	Down-regulated gene
TRINITY_DN55658_c0_g1_i2	427	-2.0617	0.0445997		_	Down-regulated gene
TRINITY_DN8250_c0_g1_i1	305	-2.07677	0.0155693		_	Down-regulated gene
TRINITY_DN56365_c0_g1_i1	246	-2.08506	0.0419379	WP_036066092.1	Hypothetical Protein	Down-regulated gene
TRINITY_DN39812_c0_g1_i1	715	-2.0859	0.0180711	AFY05648.1	Copper-Induced Metallothionein	Down-regulated gene
TRINITY_DN36966_c0_g1_i1	310	-2.10279	0.013831		_	Down-regulated gene
TRINITY_DN56119_c0_g1_i2	242	-2.11124	0.00993012		_	Down-regulated gene
TRINITY_DN23438_c0_g1_i1	227	-2.11208	0.00687454		_	Down-regulated gene
TRINITY_DN54659_c1_g1_i1	1010	-2.11762	0.0231982	KNZ60973.1	Hypothetical Protein Vp01_1472G2	Down-regulated gene
TRINITY_DN26275_c0_g1_i1	396	-2.1329	0.0181417		_	Down-regulated gene
TRINITY_DN40585_c0_g1_i1	906	-2.14569	0.0443494		_	Down-regulated gene
TRINITY_DN50732_c0_g1_i1	519	-2.15589	0.0180524	ACF93414.1	Single Ib Domain Protein	Down-regulated gene
TRINITY_DN55401_c0_g1_i2	851	-2.15986	0.0317583	ADN43412.1	Hemocyte Homeostasis-Associated Protein	Down-regulated gene
*Trinity_DN39016_c0_g1_i1	1387	-2.17341	0.0262887	ACU57197.1	Triacylglycerol Lipase	Down-regulated gene
TRINITY_DN51470_c1_g5_i1	1176	-2.22091	0.047989	BAM35674.1	Putative Reverse Transcriptase	Down-regulated gene
TRINITY_DN56411_c1_g1_i1	590	-2.24855	0.00114993	AAZ29608.1	C-Type Lectin	Down-regulated gene
TRINITY_DN6824_c0_g1_i1	316	-2.25835	0.0487122		_	Down-regulated gene
*Trinity_DN47084_c0_g4_i1	689	-2.26003	0.0131512	EKC42792.1	C-Type Mannose Receptor 2	Down-regulated gene
TRINITY_DN44181_c0_g1_i2	1631	-2.28195	0.0464828	EGX54474.1	Hypothetical Protein Szn_37783, Partial	Down-regulated gene
TRINITY_DN69393_c0_g1_i1	264	-2.29527	0.0396691		_	Down-regulated gene
TRINITY_DN55186_c2_g1_i2	519	-2.2961	0.00888318		_	Down-regulated gene
TRINITY_DN52205_c1_g3_i1	2461	-2.31391	0.0433369	AAL78166.1	Transglutaminase	Down-regulated gene
*Trinity_DN37085_c0_g1_i1	1368	-2.31552	0.0488643	AKA64754.1	C-Type Lectin 4	Down-regulated gene
TRINITY_DN48363_c0_g1_i1	778	-2.33223	0.0103162		_	Down-regulated gene
TRINITY_DN37716_c0_g1_i1	860	-2.3412	0.0156826	XP_011747761.1	Predicted: Probable Serine/Threonine-Protein Kinase Nek3	Down-regulated gene
*Trinity_DN45686_c0_g3_i2	2017	-2.34614	0.000280562	BAF51711.1	Tick Legumain	Down-regulated gene
TRINITY_DN55253_c1_g1_i4	280	-2.37607	0.00764686	XP_013183307.1	Predicted: Uncharacterized Protein Loc106129326	Down-regulated gene
TRINITY_DN54649_c0_g1_i1	2059	-2.37939	0.00188431	XP_012559007.1	Predicted: Uncharacterized Protein Loc100199872	Down-regulated gene
*Trinity_DN47743_c2_g3_i2	1680	-2.40498	0.0143724	KKF21940.1	Carbohydrate Sulfotransferase 12	Down-regulated gene
TRINITY_DN68505_c0_g1_i1	288	-2.43304	0.0142902		_	Down-regulated gene
TRINITY_DN81888_c0_g1_i1	224	-2.45207	0.00809612		_	Down-regulated gene
TRINITY_DN6963_c0_g1_i1	248	-2.48357	0.0113886		_	Down-regulated gene
TRINITY_DN51376_c1_g1_i2	540	-2.50306	0.013477		_	Down-regulated gene
TRINITY_DN50319_c0_g3_i1	489	-2.50668	0.00840582		_	Down-regulated gene
TRINITY_DN56770_c1_g1_i2	334	-2.53877	3.51389e-05		_	Down-regulated gene
*Trinity_DN56118_c1_g1_i2	365	-2.54905	0.0168158	ACD11949.1	Hypothetical Protein	Down-regulated gene
TRINITY_DN47897_c0_g1_i1	2496	-2.5558	0.00407278	AIE45536.1	Prophenoloxidase 2-Like Protein	Down-regulated gene
TRINITY_DN36458_c0_g1_i1	665	-2.57963	0.00110738		_	Down-regulated gene
TRINITY_DN36403_c0_g1_i1	285	-2.58158	0.0340456		_	Down-regulated gene
TRINITY_DN41372_c0_g1_i1	1405	-2.59713	0.0401708		_	Down-regulated gene
TRINITY_DN29994_c0_g1_i1	791	-2.66068	0.0130008	EFX62881.1	Hypothetical Protein Dappudraft_336270	Down-regulated gene
TRINITY_DN52870_c1_g3_i1	835	-2.66419	0.0374462		_	Down-regulated gene
TRINITY_DN38178_c0_g1_i1	373	-2.67914	0.0273699		_	Down-regulated gene
TRINITY_DN33583_c0_g1_i1	1054	-2.69236	0.0320548		_	Down-regulated gene
*Trinity_DN44034_c0_g1_i1	2026	-2.72636	0.014119	ADZ96217.1	Jhe-Like Carboxylesterase 1	Down-regulated gene
TRINITY_DN41934_c0_g1_i2	2093	-2.73363	0.0109358	KDQ88522.1	Hypothetical Protein L798_06649	Down-regulated gene
TRINITY_DN35451_c0_g1_i1	595	-2.73679	0.0364295		_	Down-regulated gene
TRINITY_DN55064_c1_g1_i1	1020	-2.77945	0.0293469		_	Down-regulated gene
TRINITY_DN40424_c0_g1_i2	1213	-2.83859	0.00146843	EFX74564.1	Endoribonuclease-Like Protein	Down-regulated gene
TRINITY_DN36805_c0_g1_i1	207	-2.85714	0.0256901		_	Down-regulated gene
TRINITY_DN29758_c0_g1_i1	241	-2.86769	0.0109274	ADN43412.1	Hemocyte Homeostasis-Associated Protein	Down-regulated gene
TRINITY_DN38074_c0_g1_i1	1685	-2.86957	0.0124968	CDQ83817.1	Unnamed Protein Product	Down-regulated gene
TRINITY_DN50944_c1_g1_i1	315	-2.8851	0.00258511		_	Down-regulated gene
*Trinity_DN43785_c0_g1_i1	1342	-2.88826	0.0168158	EFX89258.1	Hypothetical Protein Dappudraft_303131	Down-regulated gene
TRINITY_DN32245_c0_g1_i1	816	-2.89023	0.000770829		_	Down-regulated gene
TRINITY_DN54253_c2_g2_i1	576	-2.92213	0.0081485	AAL78166.1	Transglutaminase	Down-regulated gene
*Trinity_DN49476_c0_g1_i2	3365	-2.92393	0.00764686	XP_008486805.1	Predicted: Basic Proline-Rich Protein-Like, Partial	Down-regulated gene
TRINITY_DN22182_c0_g1_i1	289	-2.97533	0.00437355	EFX73213.1	Hypothetical Protein Dappudraft_58148	Down-regulated gene
*Trinity_DN38497_c0_g1_i3	2020	-2.99081	0.000135433	EFX73213.1	Hypothetical Protein Dappudraft_58148	Down-regulated gene
TRINITY_DN26233_c0_g1_i1	491	-2.99926	0.0434637		_	Down-regulated gene
TRINITY_DN51343_c0_g1_i2	764	-3.03423	0.0141031	ADN43412.1	Hemocyte Homeostasis-Associated Protein	Down-regulated gene
TRINITY_DN17332_c0_g1_i1	282	-3.04951	0.00440002		_	Down-regulated gene
TRINITY_DN53892_c15_g1_i1	815	-3.07235	0.0210547	ABB73282.1	Reverse Transcriptase, Partial	Down-regulated gene
TRINITY_DN36897_c0_g1_i1	512	-3.11305	0.0171825	KRY96916.1	Hypothetical Protein T11_4388	Down-regulated gene
TRINITY_DN9419_c0_g1_i1	553	-3.1149	0.00763127		_	Down-regulated gene
TRINITY_DN19846_c0_g1_i1	273	-3.14349	0.0266508		_	Down-regulated gene
TRINITY_DN40733_c0_g1_i1	2085	-3.1701	0.0203099	XP_005511633.1	Predicted: Low Quality Protein: Phosphatidylinositol Phosphatase Ptprq	Down-regulated gene
TRINITY_DN43341_c0_g1_i1	1183	-3.20654	0.000278976	EMT05457.1	Hypothetical Protein F775_24688	Down-regulated gene
TRINITY_DN51686_c7_g1_i3	3662	-3.22215	0.000460558	EFN81652.1	Epidermal Growth Factor Receptor Substrate 15-Like 1	Down-regulated gene
TRINITY_DN34921_c0_g1_i1	625	-3.29013	0.0169892		_	Down-regulated gene
TRINITY_DN53954_c0_g1_i2	253	-3.35721	0.0382582		_	Down-regulated gene
TRINITY_DN35944_c0_g1_i1	419	-3.36306	0.000573092	ENN72237.1	Hypothetical Protein Yqe_11100, Partial	Down-regulated gene
TRINITY_DN28113_c0_g1_i1	266	-3.44649	0.00446576		_	Down-regulated gene
TRINITY_DN40820_c0_g2_i2	1212	-3.47903	0.00123695	ADE58567.1	Gh5 Family Protein Gh5A	Down-regulated gene
TRINITY_DN56634_c2_g1_i4	313	-3.49731	0.00437355		_	Down-regulated gene
TRINITY_DN37660_c0_g1_i1	1352	-3.5122	0.000911379		_	Down-regulated gene
TRINITY_DN46861_c2_g1_i1	3474	-3.54515	0.000754091	EWM26413.1	Hypothetical Protein Naga_101468G1, Partial	Down-regulated gene
*Trinity_DN38209_c0_g1_i2	1388	-3.63337	0.0148686	AFN66645.1	C-Type Lectin-Like Protein	Down-regulated gene
TRINITY_DN32512_c0_g1_i1	775	-3.69567	2.02277e-05	AGG23537.1	C-Type Lectin Lecd	Down-regulated gene
*Trinity_DN40721_c0_g1_i1	1937	-3.70183	0.0100391	KDR06530.1	Sialin	Down-regulated gene
TRINITY_DN40040_c0_g2_i1	1181	-3.7117	0.0322301		_	Down-regulated gene
*Trinity_DN39078_c0_g1_i1	2641	-3.78713	5.54463e-09	XP_011431243.1	Predicted: Alpha-Mannosidase 2C1-Like Isoform X1	Down-regulated gene
TRINITY_DN36525_c0_g1_i1	1246	-3.85501	1.46792e-05	ACV97157.1	Collagenolytic Serine Protease	Down-regulated gene
TRINITY_DN58477_c0_g1_i1	496	-3.85737	3.78265e-07		_	Down-regulated gene
TRINITY_DN25055_c0_g1_i1	218	-3.85856	0.00107424		_	Down-regulated gene
*Trinity_DN32839_c0_g1_i2	603	-3.88181	0.0241976	ABI97372.1	C-Type Lectin	Down-regulated gene
TRINITY_DN28675_c0_g1_i2	1429	-3.89787	0.0315949	EIQ01364.1	Polysaccharide Lyase Family 8,Polysaccharide Lyase Family 8	Down-regulated gene
TRINITY_DN36794_c1_g1_i1	452	-3.91429	0.0149049		_	Down-regulated gene
TRINITY_DN35841_c0_g1_i1	822	-3.95002	0.00694965		_	Down-regulated gene
TRINITY_DN37067_c0_g1_i1	762	-3.95074	2.79297e-06		_	Down-regulated gene
TRINITY_DN36839_c0_g1_i1	3092	-4.008	0.000135145	XP_006668303.1	Peptidase A1	Down-regulated gene
TRINITY_DN24207_c0_g1_i1	245	-4.01296	0.038618		_	Down-regulated gene
*Trinity_DN46559_c0_g2_i1	1222	-4.11674	0.0168158	ADG86240.1	Triosephosphate Isomerase	Down-regulated gene
TRINITY_DN39062_c0_g1_i1	1301	-4.24459	0.0391942	AFJ59945.1	C-Type Lectin 1	Down-regulated gene
*Trinity_DN40935_c0_g1_i1	1684	-4.24901	0.00997645	ABY70643.1	Chitinase Precursor	Down-regulated gene
TRINITY_DN39652_c0_g1_i1	1339	-4.30948	0.000970849	XP_001623698.1	Predicted Protein	Down-regulated gene
TRINITY_DN43473_c0_g1_i4	855	-4.31184	0.00460837	BAO00967.1	Neuropeptide Like Precursor 3-Like	Down-regulated gene
TRINITY_DN37375_c0_g1_i2	697	-4.51511	0.0450414	EFX89905.1	Hypothetical Protein Dappudraft_299805	Down-regulated gene
TRINITY_DN39274_c0_g1_i1	1294	-4.53242	0.0128856		_	Down-regulated gene
TRINITY_DN50962_c1_g1_i1	344	-4.53395	0.00666122	AAL78166.1	Transglutaminase	Down-regulated gene
*Trinity_DN38536_c0_g1_i1	1963	-4.55528	6.54644e-05	XP_014020567.1	Arylsulfatase D-Like Isoform X1	Down-regulated gene
TRINITY_DN32918_c0_g1_i1	1600	-4.581	0.0292876	XP_006825780.1	Predicted: Uncharacterized Protein Loc102808491	Down-regulated gene
TRINITY_DN37534_c0_g1_i1	1113	-4.69146	7.06693e-06	EFX79713.1	Hypothetical Protein Dappudraft_304421	Down-regulated gene
TRINITY_DN55433_c1_g2_i1	265	-4.70217	1.15744e-09		_	Down-regulated gene
TRINITY_DN42287_c0_g2_i1	308	-4.712	0.000137981		_	Down-regulated gene
*Trinity_DN32887_c0_g1_i1	758	-4.80502	9.02299e-09	ACJ23247.1	Gamma-Interferon-Inducible Lysosomal Thiol Reductase	Down-regulated gene
*Trinity_DN39477_c0_g1_i1	1933	-4.81112	5.26734e-05	AIJ02081.1	Amylase	Down-regulated gene
TRINITY_DN40130_c0_g1_i1	713	-4.82748	0.0118232		_	Down-regulated gene
TRINITY_DN37903_c0_g1_i3	873	-4.83701	1.17963e-06		_	Down-regulated gene
*Trinity_DN45803_c0_g2_i1	959	-4.98752	3.76981e-08	CAA68066.1	Cathepsin L	Down-regulated gene
*Trinity_DN30878_c0_g1_i1	674	-5.06239	0.0384797	AAM62944.1	40S Ribosomal Protein S2	Down-regulated gene
*Trinity_DN36174_c0_g1_i1	545	-5.06645	0.0494721	ADW08726.1	C-Type Lectin-1	Down-regulated gene
TRINITY_DN54529_c2_g1_i1	2219	-5.17638	0.0199756	XP_011156887.1	Predicted: Trypsin-1-Like	Down-regulated gene
TRINITY_DN41231_c0_g1_i1	1058	-5.19383	3.64714e-06	ALM09356.1	Glutathione Peroxidase 3	Down-regulated gene
TRINITY_DN53619_c0_g1_i1	230	-5.24657	8.9206e-09		_	Down-regulated gene
TRINITY_DN48612_c4_g1_i1	2522	-5.26698	0.0323521	EFX72698.1	Hypothetical Protein Dappudraft_200882	Down-regulated gene
*Trinity_DN43940_c0_g1_i2	716	-5.32391	1.19477e-09	ABB03697.1	Hepatopancreas Kazal-Type Proteinase Inhibitor 1A1	Down-regulated gene
TRINITY_DN32003_c0_g1_i1	626	-5.33879	4.69679e-10	ACZ63471.1	I-Type Lysozyme-Like Protein 1	Down-regulated gene
TRINITY_DN38160_c0_g2_i1	698	-5.44146	0.000879923	XP_003439241.1	Predicted: Nk-Tumor Recognition Protein Isoform X1	Down-regulated gene
TRINITY_DN5849_c1_g1_i2	1268	-5.4539	8.87503e-06		_	Down-regulated gene
*Trinity_DN27706_c0_g1_i1	845	-5.47981	0.00234568	ACU82845.1	Fatty Acids Binding Protein	Down-regulated gene
TRINITY_DN54004_c1_g1_i1	315	-5.50801	0.000365503		_	Down-regulated gene
*Trinity_DN38446_c0_g1_i1	1054	-5.5299	8.06698e-06	CTRB1	Chymotrypsin Bi	Down-regulated gene
TRINITY_DN41228_c0_g1_i1	1272	-5.67986	2.30553e-09		_	Down-regulated gene
*Trinity_DN41581_c0_g1_i1	1042	-5.70283	4.23768e-10	ASPP	Lysosomal Aspartic Protease	Down-regulated gene
TRINITY_DN35377_c0_g1_i1	751	-6.01029	7.06693e-06		_	Down-regulated gene
TRINITY_DN55826_c0_g1_i1	368	-6.04875	0.00109929		_	Down-regulated gene
TRINITY_DN37192_c0_g1_i1	707	-6.07384	0.000412674	ADG85663.1	Lectin A Isoform 4	Down-regulated gene
TRINITY_DN17900_c0_g1_i1	363	-6.07392	3.56504e-06	AHY86471.1	Hemocyanin Subunit L1, Partial	Down-regulated gene
*Trinity_DN41225_c0_g1_i2	1212	-6.14411	3.61538e-05	ACG70181.1	Cathepsin D-Like Protein	Down-regulated gene
TRINITY_DN35081_c0_g1_i1	736	-6.14859	0.00646628	AEX59149.1	Ecdysteroid Regulated-Like Protein	Down-regulated gene
TRINITY_DN37679_c0_g1_i1	1148	-6.17193	0.00440002		_	Down-regulated gene
TRINITY_DN41870_c0_g1_i1	3331	-6.19708	0.000666847		_	Down-regulated gene
TRINITY_DN68599_c0_g1_i1	929	-6.22473	0.000723308	ACG33657.1	Serine/Arginine Repetitive Matrix Protein 1	Down-regulated gene
TRINITY_DN36567_c0_g1_i1	618	-6.34784	0.000223764	AEX59149.1	Ecdysteroid Regulated-Like Protein	Down-regulated gene
TRINITY_DN13065_c0_g1_i1	359	-6.39641	1.88421e-06		_	Down-regulated gene
TRINITY_DN52406_c2_g1_i11	416	-6.40102	2.82337e-06		_	Down-regulated gene
TRINITY_DN54762_c0_g1_i5	399	-6.50889	0.000642268		_	Down-regulated gene
*Trinity_DN40603_c0_g1_i1	2434	-6.57009	0.00438451	ADG22162.1	Chitinase 1 Precursor	Down-regulated gene
TRINITY_DN40486_c0_g1_i1	1540	-6.5757	5.13372e-13	EFX80631.1	Hypothetical Protein Dappudraft_303899	Down-regulated gene
TRINITY_DN37658_c0_g1_i3	965	-6.60798	0.000227903	AHA51293.1	Gata Domain-Containing Protein, Partial	Down-regulated gene
TRINITY_DN40813_c0_g1_i1	853	-6.78211	5.25997e-12	EKC25506.1	Vitelline Membrane Outer Layer Protein 1	Down-regulated gene
TRINITY_DN46113_c3_g1_i1	535	-6.96033	0.000666847		_	Down-regulated gene
TRINITY_DN50999_c0_g1_i2	538	-7.06468	0.0333396	XP_014511078.1	Predicted: Embryonic Protein Dc-8-Like	Down-regulated gene
TRINITY_DN33420_c0_g1_i1	580	-7.17401	0.0183519	KRY96916.1	Hypothetical Protein T11_4388	Down-regulated gene
TRINITY_DN86653_c0_g1_i1	251	-7.17434	1.59685e-05		_	Down-regulated gene
TRINITY_DN38502_c0_g1_i1	1143	-7.20888	0.0346898	XP_002423671.1	Leucine-Rich Transmembrane Protein, Putative	Down-regulated gene
TRINITY_DN44713_c0_g1_i3	1565	-7.30897	0.00540898	WP_006860061.1	Pt Repeat Family Protein	Down-regulated gene
*Trinity_DN35434_c0_g2_i1	953	-7.42402	2.82337e-06	ABD65301.1	Zinc Proteinase Mpc1	Down-regulated gene
TRINITY_DN39427_c0_g1_i2	979	-7.48088	0.00113895	XP_008214976.1	Predicted: Uncharacterized Protein Loc100680479	Down-regulated gene
TRINITY_DN38778_c0_g1_i1	1633	-7.48693	1.46792e-05	BAR98202.1	Malate Synthase	Down-regulated gene
*Trinity_DN27525_c0_g1_i1	649	-7.51345	3.87389e-11	AGS42196.1	C-Type Lectin 5	Down-regulated gene
TRINITY_DN61724_c0_g1_i1	280	-7.56091	7.08808e-07		_	Down-regulated gene
TRINITY_DN55875_c1_g1_i2	389	-7.59361	5.13707e-07		_	Down-regulated gene
*Trinity_DN40665_c0_g1_i3	903	-7.5973	6.41537e-05	AAT01142.1	Proteoliaisin	Down-regulated gene
TRINITY_DN39329_c0_g1_i1	778	-7.5984	9.88904e-07	EKC25506.1	Vitelline Membrane Outer Layer Protein 1	Down-regulated gene
TRINITY_DN40681_c0_g1_i1	922	-7.79532	1.52389e-07		_	Down-regulated gene
TRINITY_DN39321_c0_g1_i1	695	-7.81985	1.0069e-07	ACK44247.1	Vitelline Membrane Outer Layer 1-Like Protein	Down-regulated gene
TRINITY_DN36005_c0_g1_i1	986	-7.9304	5.78093e-07	XP_008434341.1	Predicted: Mucin-2-Like, Partial	Down-regulated gene
TRINITY_DN37720_c0_g1_i1	699	-7.94867	1.67893e-09	XP_007518038.1	Predicted: Mucin-3B-Like	Down-regulated gene
TRINITY_DN37559_c0_g1_i1	893	-7.94966	4.98241e-07	ACK44247.1	Vitelline Membrane Outer Layer 1-Like Protein	Down-regulated gene
TRINITY_DN29303_c0_g1_i1	1149	-8.07862	0.000563199		_	Down-regulated gene
TRINITY_DN55555_c16_g2_i8	1232	-8.13359	0.00106957	XP_014369266.1	Predicted: Uncharacterized Protein Loc106719438, Partial	Down-regulated gene
TRINITY_DN34375_c0_g1_i1	563	-8.25254	5.54463e-09		_	Down-regulated gene
TRINITY_DN39139_c0_g1_i1	1154	-8.30946	8.85599e-05		_	Down-regulated gene
TRINITY_DN35918_c0_g1_i1	754	-8.34286	1.47518e-05	XP_005180903.2	Predicted: Apolipoprotein D-Like	Down-regulated gene
TRINITY_DN47313_c0_g1_i1	650	-8.3761	1.46071e-23	AEB77775.1	Hemocyanin	Down-regulated gene
*Trinity_DN22650_c0_g1_i1	625	-8.39873	6.86481e-09	ALF45199.1	Ctldcp3	Down-regulated gene
TRINITY_DN35164_c0_g1_i1	632	-8.57756	9.27663e-10	AEO92001.1	C-Type Lectin 1	Down-regulated gene
TRINITY_DN38060_c0_g1_i1	520	-8.69586	2.52979e-10	AEB96259.1	C-Type Lectin	Down-regulated gene
TRINITY_DN20131_c0_g1_i1	1302	-8.87185	7.79943e-11	ABD65300.1	Carboxypeptidase B	Down-regulated gene
*Trinity_DN2764_c0_g1_i1	216	-9.00526	1.09262e-11	AKC91366.1	Chymotrypsin, Partial	Down-regulated gene
*Trinity_DN53862_c8_g2_i1	3119	-9.08338	0.000259113	EFX65941.1	Hypothetical Protein Dappudraft_332703	Down-regulated gene
TRINITY_DN22466_c0_g2_i1	919	-9.0943	1.97224e-06	EFX90166.1	Hypothetical Protein Dappudraft_299971	Down-regulated gene
TRINITY_DN34249_c0_g1_i1	615	-9.11163	1.59449e-06	AGI92548.1	C-Type Lectin	Down-regulated gene
TRINITY_DN28353_c0_g1_i1	922	-9.23669	0.000178825		_	Down-regulated gene
TRINITY_DN44848_c0_g1_i1	447	-9.23979	1.36247e-06	KRY98163.1	Hypothetical Protein T11_10141, Partial	Down-regulated gene
TRINITY_DN42753_c0_g1_i1	866	-9.29235	1.05154e-07	AHY86472.1	Hemocyanin Subunit L2, Partial	Down-regulated gene
*Trinity_DN33050_c0_g1_i1	1301	-9.31482	9.19064e-05	ABI97373.1	C-Type Lectin	Down-regulated gene
*Trinity_DN33347_c0_g1_i1	855	-9.33915	2.02277e-05	CAB43519.1	Zinc Proteinase	Down-regulated gene
TRINITY_DN39201_c0_g1_i1	1043	-9.36006	3.56639e-06	XP_012216518.1	Predicted: Uncharacterized Protein Loc105668636	Down-regulated gene
TRINITY_DN54078_c1_g2_i3	848	-9.36321	5.85531e-25	AHY86471.1	Hemocyanin Subunit L1, Partial	Down-regulated gene
*Trinity_DN37616_c0_g1_i1	1083	-9.54134	1.47518e-05	XP_003371813.1	Putative Low-Density Lipoprotein Receptor Domain Class A	Down-regulated gene
TRINITY_DN41491_c0_g1_i2	570	-9.64607	0.000276578	CAB63874.1	L1332.3A	Down-regulated gene
*Trinity_DN43283_c0_g1_i3	737	-9.70548	6.60694e-28	ACQ45455.1	Trypsin-Like Serine Proteinase 2	Down-regulated gene
TRINITY_DN51147_c0_g1_i1	3914	-9.70905	0.000101932	KKF21718.1	Von Willebrand Factor A Domain-Containing Protein 7	Down-regulated gene
*Trinity_DN30924_c0_g1_i1	1022	-9.89589	4.80691e-08	AGS42196.1	C-Type Lectin 5	Down-regulated gene
TRINITY_DN31755_c0_g1_i1	1256	-9.99882	4.80691e-08	XP_007974085.1	Predicted: Chondroadherin-Like Protein Isoform X1	Down-regulated gene
TRINITY_DN39697_c0_g1_i1	942	-10.209	1.25025e-14	AAK61484.1	Glycoprotein Gp2	Down-regulated gene
TRINITY_DN44355_c0_g2_i1	2077	-10.7231	3.23847e-16	AEB77775.1	Hemocyanin	Down-regulated gene
*Trinity_DN37852_c0_g1_i1	1523	-11.2911	9.38116e-11	ADB66711.1	Trypsin 1A	Down-regulated gene
TRINITY_DN49759_c2_g1_i2	365	-22.6241	1.85893e-10		_	Down-regulated gene
