# Supplementary material for: Multi-omics analysis to examine microbiota, host gene expression and metabolites in the intestine of black tiger shrimp (Penaeus monodon) with different growth performance
Source: PeerJ. 2020 Aug 14;8:e9646. doi: 10.7717/peerj.9646 (PMC7430268; doi:10.7717/peerj.9646)
Supplement: Supplemental Information 11 — The metabolites selected from variable importance in projection (VIP >1) were acquired by positive (58 metabolites) and negative ESI mode (32 metabolites). [file peerj-08-9646-s011.xlsx]

## Sheet: ParetoScale_NEG_32variables
Supplementary Table S6. Metabolite profiles comparing between Top- (T) and Bottom- (B) weight groups of 5-month-old P.monodon (n=15/group). Thirty two metabolites selected from variable importance in projection (VIP>1) were acquired by negative ESI mode.
Primary ID	B1	B2	B3	B4	B5	B6	B7	B8	B9	B10	B11	B12	B13	B14	B15		T1	T2	T3	T4	T5	T6	T7	T8	T9	T10	T11	T12	T13	T14	T15
19.39_304.24051Arachidonic acid	-0.86175	-0.208322	0.205158	0.202025	-1.18697	-0.838816	-0.080456	-0.500588	-1.71474	-0.965474	1.72856	-0.920356	-0.370104	-0.628288	-0.358102		0.364047	1.80971	-0.305158	-0.660172	0.069346	-0.30693	-0.612605	0.053052	1.40217	-0.354572	1.07586	-0.080994	2.97094	0.135571	0.937956
18.585_302.22486cis-5,8,11,14,17-Eicosapentaenoic acid	-1.28859	-0.267645	0.462034	1.18739	-0.640129	-0.304206	0.729168	0.491057	-1.60589	-0.535962	2.68486	-0.827648	0.10227	0.33216	-0.038757		-0.517732	0.845169	-0.739752	-0.998458	-0.93918	-0.311618	-0.649475	-0.308448	0.158343	-0.72265	1.67123	-0.542292	2.27927	-0.396198	0.691663
1.058_219.11072Pantothenic acid	-0.935782	-0.605306	-1.3963	0.792045	-0.956092	0.036076	-1.27441	0.236284	-1.62947	2.30418	0.596352	-1.18493	-1.14255	-0.287499	-0.303124		-0.061764	0.957959	0.83431	-0.186867	-0.048992	-0.570868	1.0633	-0.002028	0.307703	-0.498745	-0.036407	0.697639	2.69148	0.22351	0.380301
5.325_219.11073Pantothenic acid	-0.852487	-0.244878	-1.28024	0.799952	-0.883242	-0.043238	-1.22422	-0.014913	-1.59027	2.0751	0.599941	-1.26492	-1.21911	-0.234433	-0.30959		-0.651123	0.109624	0.312549	-0.345958	0.145119	0.084001	0.657306	0.237921	1.65853	-0.831816	-0.111284	0.868004	2.61373	-0.063672	1.00361
6.887_132.07842-Butoxyacetic acid	-0.588013	-0.28102	-0.768725	1.82992	-0.613275	-0.058938	-0.108312	0.208231	-0.216285	-0.471332	-0.714758	-0.602471	-0.215694	-0.075818	-0.654485		1.01193	-0.371959	-1.00918	0.083323	-0.431442	1.63922	-0.745997	-0.486955	3.88005	-0.415422	-0.321968	-0.241956	-0.62212	0.773868	0.589576
7.033_132.07842-Butoxyacetic acid	-0.568367	0.69837	-0.498728	1.00402	0.305685	-0.15511	-0.111901	-0.299496	-0.261215	-0.188594	-0.556668	-0.714929	-0.157245	-0.53543	-0.382364		-0.127249	-0.291858	-0.85668	-0.19358	-0.661774	1.10089	-0.821194	-0.592462	4.1757	-0.574939	-0.109414	-0.304049	-0.758672	1.6459	0.791343
7.577_166.06283L-(-)-3-Phenyllactic acid	-0.664722	-0.724055	-0.320448	1.31863	-0.70878	-0.123467	-0.233386	-0.23945	-0.430181	-0.256554	-0.683762	-0.731967	-0.567226	-0.527918	-0.15646		-0.428015	1.06318	-0.66598	-0.388411	-0.734491	1.66297	-0.797691	0.757833	3.8044	-0.757537	0.052311	0.525398	-0.708826	0.680027	0.984574
5.495_182.05783DL-4-Hydroxyphenyllactic acid	0.103362	-0.890504	-0.618729	1.10974	0.800225	-0.145863	-0.637764	-0.230797	-0.751271	0.366912	0.565397	-1.20076	0.095251	-0.449137	0.117041		-0.010797	0.021759	-1.22129	0.082393	-0.608908	1.48439	-1.08675	-0.080147	3.51995	-1.09826	-0.814628	0.10445	-0.731742	1.47356	0.732924
1.085_148.03693D-a-Hydroxyglutaric acid	-0.004338	-0.777598	-0.921039	-0.727869	-0.479749	0.50374	-0.508098	0.747698	-1.10454	-0.071596	0.494605	-1.17743	0.92988	0.246564	0.590517		0.588595	-0.399689	-1.17831	0.83076	0.059977	0.329199	-1.15453	0.799767	1.86819	-0.81606	-1.08325	3.29971	-0.799857	0.123914	-0.209165
1.463_148.03693D-a-Hydroxyglutaric acid	0.069485	-0.730102	-0.776709	-0.837506	-0.252877	-0.266127	-0.569923	-0.006835	-1.00231	-0.402651	0.47542	-1.02954	0.102415	-0.271186	0.299938		-0.721336	-0.430039	-1.04033	0.925549	0.159504	1.43471	-0.95914	1.16238	2.10534	-0.877074	-1.02356	2.337	-0.77558	1.9756	0.925492
1.222_148.03694d-Ribono-1,4-lactone	-0.054499	-0.6152	-0.682786	-0.691337	-0.323464	-0.377673	-0.55851	-0.435328	-0.797046	-0.438676	-0.004368	-0.801788	-0.167134	-0.355009	0.176129		-0.060594	-0.313878	-0.808745	0.950539	0.528327	1.41908	-0.737073	0.28051	3.93282	-0.774975	-0.739938	1.52091	-0.644325	1.02485	0.549175
0.83_182.07892D-(-)-Mannitol	-0.638661	-0.48318	-0.155473	-1.68917	0.152427	-0.458384	0.051315	-0.094447	-2.70517	-0.312305	-0.160289	-1.36681	-0.604131	-0.663934	-0.353866		2.53478	-0.034404	0.621465	0.597335	1.16613	0.402685	0.161774	0.578778	2.03134	0.663757	-0.079627	-0.234184	-0.056665	-0.016443	1.14535
8.745_304.14592MFCD00021794	-0.720063	-0.090372	-0.304534	-0.95023	-0.843905	-0.469959	-0.613239	-0.618667	-1.20898	-0.457009	0.077399	-0.11895	0.062059	-0.262116	-0.729895		3.48768	0.073515	-0.99827	0.648316	0.138432	-0.45909	0.337675	-0.177941	2.26067	-1.20864	1.09107	0.835898	0.175944	0.025425	1.01778
1.013_134.02131D-(+)-Malic acid	-0.468555	-0.574719	-0.722163	-0.657832	-0.485946	-0.238405	-0.71352	-0.24846	-0.924376	-0.42423	-0.272716	-0.86085	-0.639876	-0.634186	-0.387103		-0.080894	0.475824	-0.825215	-0.304262	-0.133238	-0.246063	-0.355937	1.2387	1.07001	0.992155	-0.740291	1.37405	0.044614	2.95451	2.78897
27.064_142.02398Ethyl trifluoroacetate	-0.654503	-0.353371	0.673835	-0.38981	-0.124	-1.01775	-1.04273	-0.756202	-0.942436	-0.821996	-0.403904	-0.640894	-1.49308	-0.433818	-1.73498		0.21089	0.960205	0.759675	0.644462	0.202555	-0.696171	-0.943482	1.64529	1.9038	2.04529	0.076879	1.41655	0.694766	1.07776	0.137168
8.756_145.052544-Indolecarbaldehyde	-0.390929	0.671882	-1.04422	-0.963771	-1.15584	0.240965	-0.133097	0.164495	-0.036094	-0.374513	-1.0496	-0.719292	-0.506583	-0.58964	-1.41973		0.249957	-1.13693	-0.184167	-0.366591	-0.613815	0.150395	-0.829025	0.783145	3.02945	1.56237	1.578	0.73784	0.327726	1.52743	0.490185
9.046_175.06323Indole-3-acetic acid	-0.652919	-0.194897	-0.624694	-0.377992	-0.725472	-0.34536	-0.42764	-0.580525	-0.453188	-0.38863	-0.54814	-0.647798	-0.540196	-0.594462	-0.722501		-0.380322	0.319642	-0.117704	-0.569194	-0.492808	0.709245	-0.139369	0.902126	3.91035	0.435542	0.918193	2.44323	-0.093548	-0.263164	0.242202
13_144.11481Caprylic acid	-0.705572	-0.930454	-0.974898	-0.503819	-0.640164	-0.114117	-0.959807	-0.739267	-0.232401	-0.773424	-0.987907	-0.414176	-0.482796	-0.967294	-0.939265		0.60442	-1.12075	-0.041257	0.26559	1.00926	0.712365	2.09528	0.605955	2.24492	1.68491	0.309621	1.278	-0.510481	1.63652	-0.409005
14.105_158.13049Nonanoic acid	-0.128436	-0.927066	-0.991322	-0.867238	-0.815855	-0.958659	-0.885257	-0.746524	-0.012474	-0.980496	-1.16443	-0.222853	-0.630972	-1.12576	-1.14238		0.537565	-0.819324	-0.441944	0.858229	1.20216	0.887063	1.26001	1.25011	2.63789	0.994847	0.530984	1.11869	0.268705	1.12286	0.191875
27.012_239.89909trimetaphosphoric acid	-0.675818	-0.494595	-0.581354	-0.138704	-0.532952	-0.54834	-0.569793	-0.738305	-1.37005	-0.914801	-0.74898	-0.948604	-0.899144	-0.620314	-0.673864		-0.503269	-0.590389	-0.839516	0.72558	0.37588	0.598495	0.370433	0.318521	2.05421	2.53768	1.62593	1.22491	1.62926	0.784113	0.143773
21.498_384.19725Bortezomib	0.642338	0.246223	0.107334	1.09004	-0.343036	0.174489	1.08248	1.01919	2.80194	1.6692	1.60569	-1.0918	-0.53842	-0.065401	0.083346		-0.296379	-0.088027	-1.08388	-1.40702	-1.41133	-1.2445	-0.979697	-0.019662	0.056083	-1.49142	-0.359319	0.233231	0.029494	-0.145441	-0.27574
9.6_254.05815Daidzein	-0.368772	-0.321913	-0.342714	1.53547	-0.324441	0.105633	0.231763	1.32472	-0.25311	-0.364244	4.61116	-0.253794	-0.304742	-0.321507	-0.384121		-0.334623	-0.369559	-0.383012	-0.382115	-0.384808	-0.382901	-0.384794	-0.384353	-0.385157	-0.380094	0.707678	-0.384213	-0.379882	-0.381784	-0.359773
9.688_254.05814Daidzein	-0.450082	-0.376207	-0.392141	2.79123	-0.399389	0.074326	0.327716	1.10285	0.811436	-0.446095	3.74284	-0.308021	-0.372917	-0.390404	-0.450214		-0.391463	-0.445618	-0.453457	-0.458421	-0.463994	-0.461344	-0.463474	-0.464922	-0.445961	-0.45671	0.98497	-0.459606	-0.451755	-0.403389	-0.429791
10.784_270.05311Genistein	-0.456824	-0.196352	-0.434539	2.12681	-0.195038	0.568888	0.803239	2.031	0.54063	-0.447933	3.34789	-0.347459	-0.340419	-0.318029	-0.554804		-0.548977	-0.373717	-0.520423	-0.551773	-0.584769	-0.567158	-0.593101	-0.594449	-0.550281	-0.569515	1.52833	-0.583119	-0.562558	-0.515811	-0.539741
11.586_330.24089(15Z)-9,12,13-Trihydroxy-15-octadecenoic acid	0.026346	0.619045	0.279828	1.95767	0.126455	0.531191	2.11595	1.31608	-0.085974	0.040163	3.24702	0.047518	-0.08068	0.184261	-0.28861		-0.76297	-0.808911	-0.83361	-0.654847	-0.862323	-0.748766	-0.809186	-0.864848	-0.391019	-0.914307	0.020432	-0.663312	-0.496596	-0.610104	-0.635904
18.678_278.22484a-Eleostearic acid	-0.56615	0.196175	0.112924	1.90738	-0.761417	1.34418	1.00875	1.88513	-0.544894	-0.114284	2.97782	-0.462384	-0.013655	0.322632	-0.660423		-0.160428	-0.625869	-0.901244	-0.868359	-0.797734	-0.739665	-0.976933	-0.912015	-0.279299	-0.946789	1.37681	-0.28169	0.045341	-0.146159	-0.417743
19.19_328.24055Docosahexaenoic acid	-0.324573	-0.505786	0.118111	1.83711	-1.10903	1.54351	0.675275	1.56152	-1.23089	0.285547	1.772	-0.393127	0.10874	0.396023	-0.438873		-0.460222	-0.71833	-0.616918	-1.19259	-0.858531	-0.939079	-1.45859	-0.911905	0.173227	-1.22018	1.42194	1.48442	0.757693	0.252299	-0.008807
19.545_280.24051Linoleic acid	-0.676193	0.263612	0.299789	1.75034	-1.07347	1.14806	0.428364	1.19394	-1.11291	0.090421	2.17713	-0.473122	-0.473942	0.202559	-0.608466		0.117245	-0.57439	-0.882917	-1.16351	-1.04797	-0.481335	-1.37961	-1.00163	0.570883	-1.31994	2.17411	0.337052	0.568508	0.473276	0.474115
20.499_282.25621Oleic acid	-0.20622	-0.456622	0.248879	0.443499	-0.085395	0.266199	0.130195	0.593412	-0.512984	0.047261	3.12226	-0.74691	-0.563323	0.665098	0.130107		-0.32128	-0.54478	-0.511876	-1.24092	-0.968972	-0.622093	-0.937949	-1.04246	0.040769	-1.22258	2.22495	2.1728	-0.061534	0.098607	-0.13814
0.824_180.06329D-(+)-Galactose	-0.358599	0.743903	0.04172	-0.196943	-0.369901	1.50976	0.607022	1.48265	-1.22198	0.866006	0.452974	-0.664501	0.374582	1.7194	1.62326		-0.838818	-0.873264	-0.97243	-1.36464	-1.22792	-1.17282	-1.06872	1.31501	-0.281419	-0.589479	-0.469067	-0.449375	-0.051387	1.89293	-0.457948
16.71_298.25105ricinelaidic acid	0.627278	1.67434	-0.037971	2.05792	-0.10421	2.88891	0.786784	1.10992	-0.916612	-0.200331	1.69462	-0.14032	-0.885659	0.508783	-0.113963		-0.449399	-0.603977	-0.357901	-0.722152	-0.692294	-0.81945	-0.631033	-0.897195	0.232558	-0.796634	-0.389813	-0.724667	-0.414356	-0.899738	-0.783431
17.609_436.28297tenivastatin	-0.516178	0.469963	0.834487	1.14421	-0.183134	0.210232	1.64189	-0.173997	-0.870003	1.48521	2.91696	-0.524283	-0.300754	1.72421	1.23483		-0.257443	0.05406	-0.537305	-0.950674	-1.15461	-1.01284	-0.674577	-0.892957	-0.253203	-0.74184	-0.797571	-0.859666	-0.629599	-0.325934	-0.059486

## Sheet: ParetoScale_POS_58variables
Supplementary Table S6. Metabolite profiles comparing between Top- (T) and Bottom- (B) weight groups of 5-month-old P.monodon (n=15 in Top- and n=13 in Bottom-weight groups). Fifty eight metabolites selected from variable importance in projection (VIP>1) were acquired by positive ESI mode.
Primary ID	B1	B2	B3	B5	B6	B7	B8	B10	B11	B12	B13	B14	B15		T1	T2	T3	T4	T5	T6	T7	T8	T9	T10	T11	T12	T13	T14	T15
0.89_139.060912-(Trifluoromethyl)pyrrolidine	763.506	753.786	385.144	643.023	123.419	374.226	212.656	59.7625	-178.115	678.206	329.298	150.2	363.932		-945.393	-860.775	-564.184	-806.127	-790.803	-218.963	-803.25	-411.909	257.698	762.322	-135.317	-161.902	-43.5005	-84.678	147.738
0.894_117.078972-(Methylamino)isobutyric acid	1935.96	1965.74	1141.92	1308.61	714.166	757.139	491.183	-85.4908	-663.407	1684.16	927.889	109.254	-82.8699		-1667.07	-1597.72	-1289.71	-1484.18	-1290.51	-487.887	-1441.41	-1059.92	29.0336	2401.98	-530.639	-676.783	-526.782	-417.785	-164.856
0.997_138.050924-methylthioanisole	155.903	-170.497	317.792	97.8528	106.49	144.283	351.656	160.264	-171.623	846.445	296.368	168.439	278.341		-278.742	-210.521	-81.9821	-216.292	-361.658	-202.813	-265.164	-148.244	-149.302	309.913	-118.58	-311.374	-198.496	-107.165	-241.292
1.003_137.04767Methyl isonicotinate	617.695	-612.757	1306.56	34.8715	404.846	591.759	1420.72	640.599	-548.68	2928.44	1204.21	744.928	722.37		-954.315	-746.037	-367.823	-683.026	-1263.88	-874.564	-926.92	-501.995	-591.38	916.218	-560.358	-1071.56	-664.573	-347.832	-817.52
1.003_137.04767Methyl isonicotinate	617.695	-612.757	1306.56	34.8715	404.846	591.759	1420.72	640.599	-548.68	2928.44	1204.21	744.928	722.37		-954.315	-746.037	-367.823	-683.026	-1263.88	-874.564	-926.92	-501.995	-591.38	916.218	-560.358	-1071.56	-664.573	-347.832	-817.52
1.067_152.03339Xanthine	56.2117	224.493	-2.66647	-288.864	433.26	-37.693	270.085	-280.386	842.013	-285.002	483.665	-72.9609	294.857		-174.272	-331.693	-304.917	195.42	-478.429	167.981	70.9174	314.045	83.8205	-164.648	-190.004	-263.021	-84.9528	-198.35	-278.909
1.074_123.03208Nicotinic acid	-4.72685	510.727	650.928	180.972	1264.68	487.391	653.009	890.594	681.11	302.799	1042.42	838.232	531.361		-475.257	-558.072	-514.578	-581.677	-594.131	-584.004	-581.826	-574.677	-500.303	-534.771	-557.471	-545.253	-496.862	-510.806	-419.805
1.076_121.089162,4-Xylidine	430.95	23.0209	195.537	-53.6377	-314.343	-344.709	-262.431	-150.334	39.8098	-47.15	-248.091	-20.9782	-46.5235		-41.2831	1.93159	-241.993	-53.8998	19.5386	44.5789	-121.752	213.238	378.779	-568.513	374.698	577.193	-254.271	331.387	139.246
1.082_126.04294Thymine	175.312	480.741	-87.9388	-206.47	133.693	81.6138	545.807	322.71	-114.524	-103.427	99.1629	321.182	-133.866		117.138	85.841	20.8205	-257.939	-305.69	-224.404	-327.719	-306.773	22.8702	-150.867	-98.9954	-202.616	-20.2837	-152.975	287.594
1.105_244.17845Leu-Leu	-95.928	206.034	-35.129	-139.229	954.502	38.7062	489.585	105.911	-98.593	-14.8486	149.115	593.081	-11.4235		-163.826	-118.107	201.341	-180.881	-188.015	-185.685	-188.222	-151.355	-180.262	-189.909	-138.17	-185.696	-181.727	-121.851	-169.418
1.119_230.16291-BOC-4-(2-hydroxyethyl)piperazine	-45.0027	223.663	-10.1578	-120.31	1014.43	24.8145	584.185	101.205	-145.049	-26.8612	480.863	287.246	-32.4006		-203.058	-185.215	192.723	-217.064	-218.107	-209.767	-217.105	-121.12	-210.91	-92.0169	-102.946	-211.215	-217.455	-110.471	-212.896
10.843_270.05258Genistein	-110.616	-56.1129	-99.0118	-55.2573	130.554	237.138	589.563	-105.582	1259.06	-80.3654	-80.82	-84.1626	-133.715		-132.692	-96.9272	-127.705	-133.671	-140.273	-137.639	-141.073	-140.162	-131.751	-135.679	429.791	-138.892	-133.863	-120.839	-129.292
11.31_315.24057Decanoylcarnitine	-387.535	-405.446	-324.811	-319.357	-104.311	-405.316	-167.098	-23.0543	-403.139	-24.3769	236.654	-185.328	-408.074		1467.28	611.814	851.848	-49.8368	-436.045	-404.292	566.557	-126.304	-249.534	840.884	240.361	-412.661	-362.578	-110.502	494.203
11.35_243.18326N-Boc-L-cyclohexylglycinol	635.26	-33.2841	-30.7102	-122.159	-143.91	-21.8563	-84.7898	-66.6505	-59.8483	489.318	151.002	-299.311	-62.9385		112.265	-249.677	-47.2804	384.07	-292.483	-426.669	-570.24	499.216	228.201	-42.7833	-47.1903	-118.691	458.727	-275.608	38.0201
11.352_313.06575Triazophos	-106.44	18.0721	-90.3174	-111.132	206.57	-56.0856	23.7582	-15.6387	-122.925	19.0076	470.12	-33.5047	-109.907		786.82	-80.5327	6.81994	-22.319	-135.733	-132.151	-135.714	-107.614	14.0823	137.619	-64.2985	-135.584	-83.3723	-123.128	-16.4707
11.857_321.09827MFCD00056730	-151.38	-148.884	-129.672	-152.818	616.605	-150.738	320.337	90.2996	-133.919	-128.87	1799.55	132.924	-152.866		-145.115	-149.182	262.409	-145.257	-152.328	-152.611	-152.418	-143.685	-149.811	-142.619	-150.79	-152.41	-146.546	-139.272	-150.932
11.982_341.25616trans-2-Dodecenoylcarnitine	-327.489	-366.636	-267.2	-265.893	-224.549	-344.193	-166.245	-126.05	-364.19	-105.858	-176.553	-270.435	-356.511		1310.88	8.69102	376.289	-135.242	-367.891	-310.542	580.286	103.548	-188.071	641.262	338.364	-345.765	-354.893	445.452	1259.44
11.996_299.28209Palmitoyl ethanolamide	-299.169	746.094	-134.346	153.159	157.098	-214.095	-260.753	-209.248	-260.877	-228.846	-3.56874	1454.08	-357.242		-202.7	-339.599	-357.944	-230.561	-260.448	-328.174	-143.826	576.161	210.929	-358.167	-211.268	7.62867	16.7454	774.09	304.851
12.238_321.09825MFCD00056730	-112.756	324.513	7.39793	-252.483	323.985	83.2304	639.01	-269.199	-156.08	12.2914	454	-138.562	-156.608		718.182	-97.8023	88.324	-218.012	-271.965	-266.654	-271.168	-256.387	-116.63	783.33	-189.578	-268.044	-15.822	-264.11	-112.404
12.369_359.1076N,N-Bis(2-pyridinylmethyl)-1-benzothiophene-2-carboxamide	756.354	165.524	22.6293	-597.637	-577.808	550.487	-592.52	77.535	-546.661	-77.8517	-594.128	394.769	-591.327		306.578	1356.2	119.174	-596.938	-597.422	-597.34	-597.024	494.334	605.511	-593.622	-568.828	-596.694	1136.14	788.419	952.136
12.562_321.09824MFCD00056730	-162.219	700.39	-44.1387	-251.163	-285.157	-270.858	-284.311	245.897	-224.103	-68.5795	952.993	743.269	-151.823		1057.85	-264.702	-16.8501	-178.06	-287.903	-252.108	-277.16	-181.512	-151.536	-285.09	-191.383	-278.373	783.736	-225.697	-151.405
12.571_345.09821Nitralin	25.3828	219.831	-29.1907	-211.374	830.443	-185.373	-131.271	510.562	-212.376	-201.709	874.946	994.219	-213.812		-159.179	-187.973	463.537	-206.782	-214.42	-214.487	-213.868	-138.386	-204.078	-208.909	-206.501	-213.488	-210.568	-193.484	-161.691
12.612_339.081253-(Allylthio)-5-(4-chlorophenyl)-4-(2,2-dimethoxyethyl)-4H-1,2,4-triazole	-14.3641	65.41	-47.9186	-190.823	163.806	-187.921	-156.172	203.556	-202.335	-193.798	418.073	2381.07	-202.84		122.971	-185.993	307.262	-197.632	-203.508	-203.574	-202.972	-150.571	-195.333	-199.863	-196.766	-202.601	-173.428	-187.146	-166.591
12.612_339.081253-(Allylthio)-5-(4-chlorophenyl)-4-(2,2-dimethoxyethyl)-4H-1,2,4-triazole	-14.3641	65.41	-47.9186	-190.823	163.806	-187.921	-156.172	203.556	-202.335	-193.798	418.073	2381.07	-202.84		122.971	-185.993	307.262	-197.632	-203.508	-203.574	-202.972	-150.571	-195.333	-199.863	-196.766	-202.601	-173.428	-187.146	-166.591
12.739_321.09824MFCD00056730	-79.8018	714.798	83.0002	-305.881	-304.451	31.9248	-303.832	245.581	-267.893	631.166	300.532	-260.909	-303.123		1083.83	483.771	-304.188	-304.252	-305.72	-268.558	-297.44	-195.675	76.0184	-303.21	-295.806	-300.904	800.845	-264.365	214.537
12.945_345.09821Nitralin	1315.06	-158.258	78.3718	-174.291	-290.736	261.049	-306.603	-18.086	-263.369	203.258	807.832	1953.83	-186.271		355.203	-204.753	-304.734	-283.032	-315.789	-313.683	-315.853	-277.981	-90.3596	-314.162	-292.416	-314.245	-109.534	-305.765	-134.688
12.963_339.081283-(Allylthio)-5-(4-chlorophenyl)-4-(2,2-dimethoxyethyl)-4H-1,2,4-triazole	1506.72	-115.403	142.333	-103.794	-263.021	307.951	-269.953	-98.3549	-235.211	35.3016	1041.11	591.196	-150.176		597.622	-159.097	-273.616	-227.14	-275.848	-275.503	-276.075	-273.942	-40.4718	-274.226	-252.117	-273.308	-41.3376	-273.598	-70.0341
12.963_339.081283-(Allylthio)-5-(4-chlorophenyl)-4-(2,2-dimethoxyethyl)-4H-1,2,4-triazole	1506.72	-115.403	142.333	-103.794	-263.021	307.951	-269.953	-98.3549	-235.211	35.3016	1041.11	591.196	-150.176		597.622	-159.097	-273.616	-227.14	-275.848	-275.503	-276.075	-273.942	-40.4718	-274.226	-252.117	-273.308	-41.3376	-273.598	-70.0341
13.215_353.096972-{[(2-{[5-(Trifluoromethyl)pyridin-2-yl]amino}ethyl)amino]carbonyl}benzoicacid	-411.25	1060.27	204.58	-472.735	-569.031	392.947	-670.286	1151.25	198.266	-224.515	87.2522	76.5969	-225.136		248.165	449.971	164.343	-554.089	-704.27	-688.214	-703.61	-147.622	321.894	1146.62	-337.496	-612.952	744.133	-292.503	367.415
13.215_353.096972-{[(2-{[5-(Trifluoromethyl)pyridin-2-yl]amino}ethyl)amino]carbonyl}benzoicacid	-411.25	1060.27	204.58	-472.735	-569.031	392.947	-670.286	1151.25	198.266	-224.515	87.2522	76.5969	-225.136		248.165	449.971	164.343	-554.089	-704.27	-688.214	-703.61	-147.622	321.894	1146.62	-337.496	-612.952	744.133	-292.503	367.415
13.519_361.1296Bisacodyl	-228.82	-124.491	-70.8759	-268.428	2039.27	-126.907	745.169	-268.984	-147.335	-22.9545	561.986	-80.8781	-268.595		-114.402	-146.948	796.947	-232.989	-268.801	-268.543	-268.788	-240.598	-264.131	339.894	-268.131	-268.081	-244.677	-134.384	-154.524
13.528_258.12053{(3S)-3-[(tert-Butoxycarbonyl)amino]-2-oxopyrrolidin-1-yl}acetic acid	-226.582	-87.5782	-248.147	-68.7161	177.514	250.299	-77.6021	745.526	-301.122	-117.249	156.728	440.778	-277.838		331.026	-179.83	73.8771	-293.328	-506.314	-180.298	-230.481	71.5045	505.444	-215.355	282.072	-222.73	-356.473	-137.62	692.491
13.947_349.12956MFCD00237073	-115.625	427.365	-43.0722	-305.568	194.735	-13.0342	915.927	331.314	-85.9525	-99.1244	135.97	31.8441	-315.078		-134.394	123.776	104.082	-352.001	-366.672	-367.309	-365.394	130.412	-185.609	685.77	-218.932	-347.986	123.49	123.211	-12.1438
14.066_375.25189MFCD05720464	-2195.42	-2286.59	-2269.87	-2237.2	-2227.65	-2271	-2249.43	-2310.15	-2341.64	-2198.55	-2024.41	-2239.63	-2094.62		2122.29	321.09	1863.09	1597.32	1547.85	1189.9	978.816	4061.2	3305.05	1563.8	2701.46	1469.63	2090.98	817.924	3315.74
14.079_397.23372N-[[(8R,9R)-6-[(2S)-1-hydroxypropan-2-yl]-8-methyl-5-oxo-10-oxa-1,6,14,15-tetrazabicyclo[10.3.0]pentadeca-12,14-dien-9-yl]methyl]-N-methylcarbamic acid methyl ester	-1315.99	-1401.38	-1365.33	-1332.57	-1249.46	-1315.59	-1337.75	-1383.67	-1393.95	-1325.83	-1140.39	-1295.74	-1181.32		1342.26	267.725	960.518	1185.63	1080.63	857.99	769.788	2347.57	1818.96	587.984	1637.76	777.927	1112.84	391.218	1900.18
14.079_397.23372N-[[(8R,9R)-6-[(2S)-1-hydroxypropan-2-yl]-8-methyl-5-oxo-10-oxa-1,6,14,15-tetrazabicyclo[10.3.0]pentadeca-12,14-dien-9-yl]methyl]-N-methylcarbamic acid methyl ester	-1315.99	-1401.38	-1365.33	-1332.57	-1249.46	-1315.59	-1337.75	-1383.67	-1393.95	-1325.83	-1140.39	-1295.74	-1181.32		1342.26	267.725	960.518	1185.63	1080.63	857.99	769.788	2347.57	1818.96	587.984	1637.76	777.927	1112.84	391.218	1900.18
14.103_391.14018Dimetotiazine	-177.682	-147.368	-159.121	-193.946	411.123	-20.284	271.081	742.556	-126.256	-80.4091	-138.365	112.628	-156.068		-172.046	-16.8864	303.792	-194.616	-184.234	-185.278	-176.724	-54.9799	-10.1649	302.791	-171.419	-182.202	-42.2064	-142.088	588.374
14.126_303.15007MFCD09866183	-181.513	-134.34	-158.983	-189.681	756.684	-177.354	219.887	-8.1239	-192.365	390.847	866.478	572.045	-187.705		335.743	-145.273	148.079	-187.22	-180.58	-181.366	-174.922	-182.777	-158.38	-5.71086	-167.481	-184.785	-140.748	-176.608	-173.845
14.346_347.11386Met-FMDP	65.6675	82.7931	208.019	-127.428	247.875	151.613	-135.148	165.585	-191.361	312.642	728.033	735.842	-165.638		249.526	-113.191	-38.9744	-164.596	-203.23	-197.06	-197.267	-172.665	-185.3	-153.166	-190.051	-201.744	-188.407	-190.523	-131.845
14.424_414.20384Bis(4-ethylbenzylidene)sorbitol	914.828	-81.662	227.891	-175.977	-261.966	2.4769	304.688	-206.582	-184.697	-139.127	-115.697	-247.696	-186.303		1396.73	-143.573	-209.326	384.855	-202.399	-213.063	-229.315	117.027	11.1713	-176.187	-92.7261	-127.012	-180.716	-139.971	-45.666
14.666_499.26974(2R)-1-{[(2-Aminoethoxy)(hydroxy)phosphoryl]oxy}-3-hydroxy-2-propanyl (5Z,8Z,11Z,14Z,17Z)-5,8,11,14,17-icosapentaenoate	-5.24645	-287.477	-318.592	-199.324	-142.187	-310.224	-253.335	-223.354	0.187715	-335.465	-175.976	-262.89	-37.551		-126.644	-58.0332	-316.376	-136.092	-203.978	122.831	422.098	1645.77	257.941	-17.7969	-177.107	-5.28589	-97.6212	1165.66	76.0704
14.967_380.25349MFCD02673200	69.5266	26.1027	308.61	163.725	-96.8919	-53.3166	-52.4612	-114.192	66.2845	163.403	150.579	210.509	-233.815		-196.394	-215.44	-218.975	-183.101	-234.751	-96.6581	-181.557	10.3204	-180.834	215.781	803.954	-181.102	-182.416	-223.047	456.156
15.212_423.33453Linoleyl carnitine	-298.809	-300.171	-168.527	-274.534	-244.338	-190.031	-138.423	-324.346	-187.462	-141.422	-256.826	-275.858	-313.042		122.231	1051.23	55.3201	-279.803	-190.744	-241.537	157.152	166.262	-315.217	158.88	1292.08	43.3271	657.589	314.436	122.579
15.737_399.33448Palmitoylcarnitine	-262.564	-285.963	-143.09	-303.133	-250.069	-261.645	-216.913	-267.845	-137.725	-187.228	-247.063	-245.675	-253.712		150.803	744.907	797.497	-144.892	-193.139	-232.045	85.3618	72.3896	-290.437	248.09	1174.12	-207.807	582.992	121.571	153.214
16.143_425.35016MFCD22416941	-243.437	-235.874	-64.7836	-264.812	-171.393	-193.698	-183.663	-231.574	-200.201	-138.837	-272.047	-221.986	-232.231		178.598	442.908	679.393	-247.339	-161.135	-182.913	18.6157	128.266	-256.131	257.828	1073.36	24.1514	339.015	238.268	121.651
16.355_234.161763,5-di-tert-Butyl-4-hydroxybenzaldehyde	12.5261	-2.74639	-79.1695	20.0703	-262.982	-293.355	177.346	-210.529	-202.552	3.17971	80.6802	-295.019	-260.506		-110.627	-261.883	-62.269	-141.236	54.7993	-25.8043	87.0193	428.005	293.067	719.278	101.125	-57.1567	58.9058	224.703	5.13078
2.696_204.05667MFCD01924790	-1.717	154.323	-60.5248	-269.71	282.192	42.0621	-44.5473	125.813	-328.537	-325.775	-99.094	1156.74	-186.571		1490.17	295.363	-215.732	222.567	-168.955	-349.522	-112.559	-245.862	-242.359	-355.183	-232.066	-192.628	-94.2078	-261.558	17.8822
22.018_337.33407Erucamide	-131.296	8.51657	539.865	-222.307	-250.084	-169.423	921.196	-22.2816	107.063	651.753	331.383	43.4703	703.88		-446.7	-79.7831	-123.367	-277.18	-15.6547	-412.989	-90.1797	219.621	-347.604	123.182	-406.028	14.5318	-61.1673	-339.119	-269.298
4.067_204.05669MFCD01924790	84.8721	125.771	-148.631	-243.585	313.119	46.6074	-6.62223	29.7197	-303.193	-297.158	-36.2659	1334	-200.647		723.182	69.447	-148.336	-7.12638	-152.254	-7.09156	-133.689	-208.82	120.793	-313.364	-256.069	-193.633	-169.544	-261.919	240.441
5.375_219.11049D-PANTOTHENIC ACID	-269.332	-129.575	-332.254	-203.68	-89.779	-383.35	7.43177	403.11	132.335	-351.951	-367.344	-230.596	-172.097		-215.115	217.108	-41.3298	-192.852	-118.676	-29.8989	111.572	396.478	585.83	-30.8175	-90.5418	220.014	568.925	338.035	268.349
6.208_129.15174Octodrine	-74.6556	-23.5844	18.8669	-194.373	-132.793	-220.491	25.655	16.3432	37.3524	-198.018	-230.977	-9.95613	-142.685		896.925	81.821	163.094	-150.599	-332.741	-378.398	-206.073	1303.35	0.704685	-273.653	36.3962	-136.809	56.5389	5.88864	62.873
6.351_244.17845Leu-Leu	-97.7705	136.361	-87.338	-151.167	634.122	25.8068	657.881	221.701	-126.313	-32.2628	221.385	549.879	-67.1869		-150.808	-130.143	305.101	-189.338	-190.081	-188.476	-188.862	-88.8223	-174.298	-147.082	-131.969	-187.658	-167.567	-86.8412	-168.252
6.489_244.17846Leu-Leu	-129.17	-58.9177	-96.7424	-120.511	1147.08	-124.939	600.859	-38.4356	-122.765	-74.8965	277.814	106.716	-127.353		-123.428	-116.907	350.802	-131.777	-132.828	-131.967	-132.78	-125.944	-132.465	58.6918	-129.544	-132.723	-131.317	-96.5422	-130.011
6.761_244.17846Leu-Leu	-87.7227	140.315	-17.5031	-152.872	805.735	-22.8601	339.027	106.345	-125.402	32.0218	67.0699	463.023	-188.021		-135.694	-132.129	223.073	-187.909	-187.903	-178.948	-187.14	14.3221	-146.899	157.535	-97.723	-170.142	-160.209	-19.0233	-150.364
6.814_129.15174Octodrine	-44.9659	-44.1458	-44.5832	-46.1521	-37.3905	-48.1704	-39.0295	-41.7932	-44.5379	-45.2594	-40.3534	-43.9703	-45.5138		-38.4034	-42.478	-45.8121	-44.8872	-49.2412	-49.6903	-48.4972	-34.792	-42.9892	1182.06	-43.9563	-46.0603	-45.4652	-41.8141	-42.113
8.124_246.10356MFCD03832701	-30.8317	-29.9339	-112.937	-212.42	909.133	-19.5551	136.779	228.155	-231.476	-174.464	68.2515	1052.35	-124.084		406.637	83.0102	-91.1463	-112.549	-235.314	-228.815	-223.787	-149.871	-64.3311	-217.498	-167.936	-184.293	-151.137	-126.532	4.59108
9.398_260.11922MFCD07784454	-69.3802	-33.8415	-228.892	-373.21	1594.88	-63.5516	344.804	493.365	-418.556	-310.972	303.296	1870.86	-169.528		725.299	157.371	-188.262	-189.234	-423.037	-400.065	-407.529	-319.584	-158.859	-411.644	-331.661	-348.545	-301.92	-312.01	-29.5937
9.72_287.209345955761	-253.755	-221.282	-255.605	-192.975	263.322	-231.045	-29.6651	135.91	-206.951	-101.215	656.998	-63.5042	-193.379		366.145	385.851	412.676	-50.0094	-251.51	-219.103	285.442	-55.2589	-251.377	429.242	-17.2498	-218.069	-221.727	1.04609	97.047
